# Supplementary material for: Utilization of medicinal polysaccharides by human gut Bacteroides and Parabacteroides species
Source: Research Square preprint supplement (doi:10.21203/rs.3.rs-4750503/v1), 2024-07-26
Supplement: Supplementary file 1 [file 2c1d3ce8ff225ba54b617d47.xlsx]

## Sheet: SupTable1
Supplementary Table 1 Strains list of BacPUS
id	strain_id	species	Note
S1	DA21	Parabacteroides merdae
S2	DA26	Bacteroides dorei
S3	DA57	Bacteroides vulgatus
S4	DA173	Bacteroides bouchesdurhonensis
S5	DA320	Bacteroides cellulosilyticus
S6	DA347	Bacteroides finegoldii
S7	DA486	Bacteroides fragilis
S8	DA505	Bacteroides ovatus
S9	DA701	Parabacteroides johnsonii
S10	DA729	Parabacteroides goldsteinii
S11	DA1114	Bacteroides eggerthii
S12	DA1414	Bacteroides faecis
S13	DA1439	Bacteroides clarus
S14	DA1461	Bacteroides oleiciplenus
S15	DA104	Parabacteroides distasonis
S16	DA16	Bacteroides thetaiotaomicron
S17	DA103	Bacteroides massiliensis
S18	DA183	Bacteroides uniformis
S19	DA557	Bacteroides fragilis
S20	DA679	Bacteroides caccae
S21	DA816	Bacteroides stercoris
S22	DA904	Bacteroides faecichinchillae
S23	DA1209	Bacteroides sartorii
S24	DA1247	Bacteroides salyersiae
S25	DA1479	Bacteroides intestinalis
S26	DA14	Bacteroides xylanisolvens	Due to contamination of strains DA916, DA261, and DA1466, they were replaced with DA14, DA647 and DA672.
S27	DA647	Bacteroides clarus	Due to contamination of strains DA916, DA261, and DA1466, they were replaced with DA14, DA647 and DA672.
S28	DA672	Parabacteroides faecis	Due to contamination of strains DA916, DA261, and DA1466, they were replaced with DA14, DA647 and DA672.

## Sheet: SupTable2
Supplementary Table 2 prevalance and relative abundance of BacPUS
SampleID	scientific.name	p	mean relative abundance	median relative abundance	SD of relative abundance	prevalence
DA21	Parabacteroides merdae	Parabacteroides	1.47419	0.42037	4.12414	0.569279
DA26	Bacteroides dorei	Bacteroides	2.22276	0.17916	6.51583	0.635119
DA57	Bacteroides vulgatus	Bacteroides	4.09003	1.25477	6.86015	0.701204
DA173	Bacteroides bouchesdurhonensis	Bacteroides	0	0	0	0
DA320	Bacteroides cellulosilyticus	Bacteroides	1.03039	0.09041	3.05796	0.518425
DA347	Bacteroides finegoldii	Bacteroides	0.723318	0.0646169	2.54345	0.236519
DA486	Bacteroides fragilis	Bacteroides	1.19495	0.12083	4.53655	0.534455
DA505	Bacteroides ovatus	Bacteroides	2.30596	0.739456	4.34941	0.700528
DA701	Parabacteroides johnsonii	Parabacteroides	0.637362	0.05876	1.72563	0.3241
DA729	Parabacteroides goldsteinii	Parabacteroides	0.140464	0.0127197	0.741211	0.307825
DA1114	Bacteroides eggerthii	Bacteroides	1.69889	0.0269364	6.09313	0.403636
DA1414	Bacteroides faecis	Bacteroides	0.887637	0.06501	2.3845	0.12044
DA1439	Bacteroides clarus	Bacteroides	0.682015	0.1881	1.20483	0.07929
DA1461	Bacteroides oleiciplenus	Bacteroides	0.0734698	0.0103925	0.330991	0.144577
DA104	Parabacteroides distasonis	Parabacteroides	0.90092	0.278087	1.97718	0.628056
DA16	Bacteroides thetaiotaomicron	Bacteroides	1.01786	0.394232	2.19898	0.647402
DA103	Bacteroides massiliensis	Bacteroides	1.88362	0.323517	4.03018	0.479179
DA183	Bacteroides uniformis	Bacteroides	4.60875	2.11033	6.38664	0.737133
DA679	Bacteroides caccae	Bacteroides	1.45274	0.478471	3.18564	0.616632
DA816	Bacteroides stercoris	Bacteroides	2.71697	0.293889	6.10007	0.544958
DA904	Bacteroides faecichinchillae	Bacteroides	0.0174525	0.00421959	0.318964	0.107296
DA1209	Bacteroides sartorii	Bacteroides	0.0336224	0.00548908	0.673311	0.204336
DA1247	Bacteroides salyersiae	Bacteroides	0.385562	0.0161577	1.00055	0.254207
DA1479	Bacteroides intestinalis	Bacteroides	0.46159	0.04513	1.76755	0.453077
DA14	Bacteroides xylanisolvens	Bacteroides	0.483161	0.09392	1.5705	0.579843
DA672	Parabacteroides faecis	Parabacteroides	0	0	0	0
DA25	Alistipes shahii	Alistipes	0.660715	0.262368	1.08451	0.576403
DA253	Alistipes onderdonkii	Alistipes	0.926195	0.213999	2.16638	0.576526
DA338	Alistipes finegoldii	Alistipes	0.341573	0.082294	0.858086	0.514187

## Sheet: SupTable3
Supplementary Table 3A Source and taxonomy of herbal medicine polysaccarides
No.	Medicinal polysaccarides	Abbreviate	Phylum	Class	Order	Family	Genus	Species	Source
No.1	Ginseng polysaccharides	GPs	Angiospermae	Dicotyledoneae	Umbelliflorae	Araliaceae	Panax	Panax ginseng	Ji 'an, Ji Lin
No.2	Dendrobe polysaccharides	DPs	Angiospermae	Monocotyledoneae	Microspermae	Orchidaceae	Dendrobium	Dendrobium officinale	Wenshan, An Hui/Ningbo, Zhe Jiang
No.3	Ganoderma lucidum polysaccharides	GLPs	Basidiomycota	Agaricomycetes	Polyporales	Ganodermataceae	Ganoderma	Ganoderma lucidum	Tai‘an, Shandong/Guiyang, Gui Zhou
No.4	Lycium barbarum polysaccharides	LBPs	Angiospermae	Dicotyledoneae	Tubiflorae	Solanaceae	Lycium	Lycium barbarum	Zhongning, Ning Xia
No.5	Astragalus polysaccharides	APs	Magnoliophyta	Magnoliopsida	Fabales	Fabaceae	Astragalus	Astragalus membranaceus	Guyang, Nei Mongol
No.6	Polygonatum sibiricum Polysaccharides	PSPs	Angiospermae	Monocotyledoneae	Liliflorae	Liliaceae	Polygonatum	Polygonatum sibiricum	Yibin, Si Chuan
No.7	Adenophora Polysaccharides	AdPs	Angiospermae	Dicotyledoneae	Campanulales	Campanulaceae	Glehnia	Glehnia littoralis	Chifeng, Nei Mongol
No.8	Scrophulariaceae Polysaccharide	SPs	Angiospermae	Dicotyledoneae	Tubiflorae	Scrophulariaceae	Scrophularia	Scrophularia ningpoensis	Handan, He Bei
No.9	Pueraria lobata Polysaccharides	PLPs	Magnoliophyta	Magnoliopsida	Fabales	Fabaceae	Pueraria	Pueraria lobata	Baoji, Shaan Xi
No.10	Radix Pseudoxtellariae Polysaccharides	RPPs	Angiospermae	Dicotyledoneae	Centrospermae	Caryophyllaceae	Pseudostellaria	Pseudostellaria heterophylla	Xuancheng, An Hui
No.11	Rhizoma Anemarrhenae Polysaccharides	RAPs	Angiospermae	Monocotyledoneae	Liliflorae	Liliaceae	Anemarrhenae	Anemarrhena asphodeloides	Baoding, He Bei
No.12	Radix Notoginseng Polysaccharides	RNPs	Angiospermae	Dicotyledoneae	Umbelliflorae	Araliaceae	Panax	Radix notoginseng	Wenshan, Yun Nan
No.13	Panax Quinquefolium Polysaccharides	PQPs	Angiospermae	Dicotyledoneae	Umbelliflorae	Araliaceae	Panax	Panax quinquefolium	Baishan, Ji Lin
No.14	Poria Polysaccharides	PPs	Basidiomycota	Agaricomycetes	Polyporales	Polyporaceae	Poria	Poria cocos	Enshi, Hu Bei
No.15	Angelica Polysaccharides	AnPs	Angiospermae	Dicotyledoneae	Umbelliflorae	Umbelliferae	Angelica	Angelica sinensis	Dingxi, Gan Su
No.16	Codonopsis Pilosula Polysaccharides	CPPs	Angiospermae	Dicotyledoneae	Campanulales	Campanulaceae	Codonopsis	Codonopsis pilosula	Changzhi, Shan Xi
No.17	Hovenia Acerba Polysaccharides	HAPs	Angiospermae	Dicotyledoneae	Rhamnales	Rhamnaceae	Hovenia	Hovenia acerba	Ankang, Shaan Xi

## Sheet: SupTable4
Supplementary Table 4 The growth profile of medicinal polysaccharide
DA_num	Species	Polysaccharide	Batch	Time	OD600
DA21	Parabacteroides_merdae	NC	1	0	-0.001
DA26	Bacteroides_dorei	NC	1	0	-0.002
DA57	Bacteroides_vulgatus	NC	1	0	0.005
DA173	Bacteroides_bouchesdurhonensis	NC	1	0	-0.002
DA320	Bacteroides_cellulosilyticus	NC	1	0	-0.002
DA347	Bacteroides_sp900066265	NC	1	0	0.001
DA486	Bacteroides_fragilis_A	NC	1	0	0.005
DA505	Bacteroides_ovatus	NC	1	0	-0.003
DA701	Parabacteroides_johnsonii	NC	1	0	-0.002
DA729	Parabacteroides_goldsteinii	NC	1	0	-0.001
DA1114	Bacteroides_eggerthii	NC	1	0	0.003
DA1414	Bacteroides_faecis	NC	1	0	0
DA1439	Bacteroides_sp003545565	NC	1	0	-0.001
DA1461	Bacteroides_oleiciplenus	NC	1	0	-0.002
DA104	Parabacteroides_distasonis	NC	1	0	-0.001
DA16	Bacteroides_thetaiotaomicron	NC	1	0	-0.003
DA103	Bacteroides_massiliensis	NC	1	0	0
DA183	Bacteroides_uniformis	NC	1	0	0.004
DA557	Bacteroides_fragilis	NC	1	0	-0.002
DA679	Bacteroides_caccae	NC	1	0	0.003
DA816	Bacteroides_stercoris	NC	1	0	0.003
DA904	Bacteroides_faecichinchillae	NC	1	0	0.005
DA1209	Bacteroides_sartorii	NC	1	0	0
DA1247	Bacteroides_salyersiae	NC	1	0	-0.002
DA1479	Bacteroides_intestinalis_A	NC	1	0	0.004
DA14	Bacteroides_xylanisolvens	NC	1	0	0.001
DA647	Bacteroides_clarus	NC	1	0	-0.001
DA672	Parabacteroides_faecis	NC	1	0	0.003
DA21	Parabacteroides_merdae	RNPs	1	0	0.012
DA26	Bacteroides_dorei	RNPs	1	0	0.013
DA57	Bacteroides_vulgatus	RNPs	1	0	0.01
DA173	Bacteroides_bouchesdurhonensis	RNPs	1	0	0.006
DA320	Bacteroides_cellulosilyticus	RNPs	1	0	-0.001
DA347	Bacteroides_sp900066265	RNPs	1	0	0.005
DA486	Bacteroides_fragilis_A	RNPs	1	0	0.006
DA505	Bacteroides_ovatus	RNPs	1	0	0.004
DA701	Parabacteroides_johnsonii	RNPs	1	0	0.007
DA729	Parabacteroides_goldsteinii	RNPs	1	0	0.016
DA1114	Bacteroides_eggerthii	RNPs	1	0	0.003
DA1414	Bacteroides_faecis	RNPs	1	0	0.012
DA1439	Bacteroides_sp003545565	RNPs	1	0	0.005
DA1461	Bacteroides_oleiciplenus	RNPs	1	0	0.01
DA104	Parabacteroides_distasonis	RNPs	1	0	0.012
DA16	Bacteroides_thetaiotaomicron	RNPs	1	0	0.012
DA103	Bacteroides_massiliensis	RNPs	1	0	0
DA183	Bacteroides_uniformis	RNPs	1	0	0.012
DA557	Bacteroides_fragilis	RNPs	1	0	0.014
DA679	Bacteroides_caccae	RNPs	1	0	0.001
DA816	Bacteroides_stercoris	RNPs	1	0	0.015
DA904	Bacteroides_faecichinchillae	RNPs	1	0	0.007
DA1209	Bacteroides_sartorii	RNPs	1	0	0.006
DA1247	Bacteroides_salyersiae	RNPs	1	0	0.009
DA1479	Bacteroides_intestinalis_A	RNPs	1	0	0.004
DA14	Bacteroides_xylanisolvens	RNPs	1	0	0.006
DA647	Bacteroides_clarus	RNPs	1	0	0.014
DA672	Parabacteroides_faecis	RNPs	1	0	0.005
DA21	Parabacteroides_merdae	PQPs	1	0	-0.001
DA26	Bacteroides_dorei	PQPs	1	0	0.002
DA57	Bacteroides_vulgatus	PQPs	1	0	-0.004
DA173	Bacteroides_bouchesdurhonensis	PQPs	1	0	-0.002
DA320	Bacteroides_cellulosilyticus	PQPs	1	0	0.009
DA347	Bacteroides_sp900066265	PQPs	1	0	0.014
DA486	Bacteroides_fragilis_A	PQPs	1	0	-0.002
DA505	Bacteroides_ovatus	PQPs	1	0	0
DA701	Parabacteroides_johnsonii	PQPs	1	0	-0.001
DA729	Parabacteroides_goldsteinii	PQPs	1	0	0.007
DA1114	Bacteroides_eggerthii	PQPs	1	0	0.01
DA1414	Bacteroides_faecis	PQPs	1	0	0.012
DA1439	Bacteroides_sp003545565	PQPs	1	0	0.008
DA1461	Bacteroides_oleiciplenus	PQPs	1	0	0.012
DA104	Parabacteroides_distasonis	PQPs	1	0	0.011
DA16	Bacteroides_thetaiotaomicron	PQPs	1	0	0.009
DA103	Bacteroides_massiliensis	PQPs	1	0	0.013
DA183	Bacteroides_uniformis	PQPs	1	0	0.013
DA557	Bacteroides_fragilis	PQPs	1	0	0.01
DA679	Bacteroides_caccae	PQPs	1	0	0.006
DA816	Bacteroides_stercoris	PQPs	1	0	-0.003
DA904	Bacteroides_faecichinchillae	PQPs	1	0	0.007
DA1209	Bacteroides_sartorii	PQPs	1	0	-0.002
DA1247	Bacteroides_salyersiae	PQPs	1	0	-0.004
DA1479	Bacteroides_intestinalis_A	PQPs	1	0	-0.003
DA14	Bacteroides_xylanisolvens	PQPs	1	0	-0.003
DA647	Bacteroides_clarus	PQPs	1	0	0.01
DA672	Parabacteroides_faecis	PQPs	1	0	0.017
DA21	Parabacteroides_merdae	RPPs	1	0	0.012
DA26	Bacteroides_dorei	RPPs	1	0	0.001
DA57	Bacteroides_vulgatus	RPPs	1	0	-0.002
DA173	Bacteroides_bouchesdurhonensis	RPPs	1	0	0.013
DA320	Bacteroides_cellulosilyticus	RPPs	1	0	-0.002
DA347	Bacteroides_sp900066265	RPPs	1	0	0.01
DA486	Bacteroides_fragilis_A	RPPs	1	0	0.009
DA505	Bacteroides_ovatus	RPPs	1	0	-0.002
DA701	Parabacteroides_johnsonii	RPPs	1	0	0.014
DA729	Parabacteroides_goldsteinii	RPPs	1	0	0.009
DA1114	Bacteroides_eggerthii	RPPs	1	0	-0.002
DA1414	Bacteroides_faecis	RPPs	1	0	0.004
DA1439	Bacteroides_sp003545565	RPPs	1	0	-0.002
DA1461	Bacteroides_oleiciplenus	RPPs	1	0	-0.003
DA104	Parabacteroides_distasonis	RPPs	1	0	0.015
DA16	Bacteroides_thetaiotaomicron	RPPs	1	0	0.005
DA103	Bacteroides_massiliensis	RPPs	1	0	0.004
DA183	Bacteroides_uniformis	RPPs	1	0	-0.002
DA557	Bacteroides_fragilis	RPPs	1	0	-0.002
DA679	Bacteroides_caccae	RPPs	1	0	0.002
DA816	Bacteroides_stercoris	RPPs	1	0	0.005
DA904	Bacteroides_faecichinchillae	RPPs	1	0	0.004
DA1209	Bacteroides_sartorii	RPPs	1	0	-0.001
DA1247	Bacteroides_salyersiae	RPPs	1	0	0.005
DA1479	Bacteroides_intestinalis_A	RPPs	1	0	0.015
DA14	Bacteroides_xylanisolvens	RPPs	1	0	-0.001
DA647	Bacteroides_clarus	RPPs	1	0	0.006
DA672	Parabacteroides_faecis	RPPs	1	0	0.012
DA21	Parabacteroides_merdae	CPPs	1	0	-0.001
DA26	Bacteroides_dorei	CPPs	1	0	-0.004
DA57	Bacteroides_vulgatus	CPPs	1	0	-0.001
DA173	Bacteroides_bouchesdurhonensis	CPPs	1	0	-0.004
DA320	Bacteroides_cellulosilyticus	CPPs	1	0	0.003
DA347	Bacteroides_sp900066265	CPPs	1	0	0.009
DA486	Bacteroides_fragilis_A	CPPs	1	0	0.002
DA505	Bacteroides_ovatus	CPPs	1	0	0.011
DA701	Parabacteroides_johnsonii	CPPs	1	0	0.008
DA729	Parabacteroides_goldsteinii	CPPs	1	0	0.001
DA1114	Bacteroides_eggerthii	CPPs	1	0	0.009
DA1414	Bacteroides_faecis	CPPs	1	0	0.002
DA1439	Bacteroides_sp003545565	CPPs	1	0	0.005
DA1461	Bacteroides_oleiciplenus	CPPs	1	0	0.009
DA104	Parabacteroides_distasonis	CPPs	1	0	0.007
DA16	Bacteroides_thetaiotaomicron	CPPs	1	0	-0.004
DA103	Bacteroides_massiliensis	CPPs	1	0	-0.003
DA183	Bacteroides_uniformis	CPPs	1	0	0.004
DA557	Bacteroides_fragilis	CPPs	1	0	0.007
DA679	Bacteroides_caccae	CPPs	1	0	0.012
DA816	Bacteroides_stercoris	CPPs	1	0	0.009
DA904	Bacteroides_faecichinchillae	CPPs	1	0	0.004
DA1209	Bacteroides_sartorii	CPPs	1	0	0.008
DA1247	Bacteroides_salyersiae	CPPs	1	0	0.006
DA1479	Bacteroides_intestinalis_A	CPPs	1	0	0.003
DA14	Bacteroides_xylanisolvens	CPPs	1	0	0.006
DA647	Bacteroides_clarus	CPPs	1	0	0.002
DA672	Parabacteroides_faecis	CPPs	1	0	0.004
DA21	Parabacteroides_merdae	AdPs	1	0	0.003
DA26	Bacteroides_dorei	AdPs	1	0	0
DA57	Bacteroides_vulgatus	AdPs	1	0	0
DA173	Bacteroides_bouchesdurhonensis	AdPs	1	0	-0.001
DA320	Bacteroides_cellulosilyticus	AdPs	1	0	-0.001
DA347	Bacteroides_sp900066265	AdPs	1	0	-0.001
DA486	Bacteroides_fragilis_A	AdPs	1	0	-0.001
DA505	Bacteroides_ovatus	AdPs	1	0	0.002
DA701	Parabacteroides_johnsonii	AdPs	1	0	0.015
DA729	Parabacteroides_goldsteinii	AdPs	1	0	0.001
DA1114	Bacteroides_eggerthii	AdPs	1	0	0.006
DA1414	Bacteroides_faecis	AdPs	1	0	0.004
DA1439	Bacteroides_sp003545565	AdPs	1	0	0
DA1461	Bacteroides_oleiciplenus	AdPs	1	0	0.002
DA104	Parabacteroides_distasonis	AdPs	1	0	0.009
DA16	Bacteroides_thetaiotaomicron	AdPs	1	0	0.004
DA103	Bacteroides_massiliensis	AdPs	1	0	-0.002
DA183	Bacteroides_uniformis	AdPs	1	0	0.005
DA557	Bacteroides_fragilis	AdPs	1	0	-0.002
DA679	Bacteroides_caccae	AdPs	1	0	0.005
DA816	Bacteroides_stercoris	AdPs	1	0	0.003
DA904	Bacteroides_faecichinchillae	AdPs	1	0	0.004
DA1209	Bacteroides_sartorii	AdPs	1	0	0.006
DA1247	Bacteroides_salyersiae	AdPs	1	0	0.002
DA1479	Bacteroides_intestinalis_A	AdPs	1	0	0.001
DA14	Bacteroides_xylanisolvens	AdPs	1	0	-0.001
DA647	Bacteroides_clarus	AdPs	1	0	0
DA672	Parabacteroides_faecis	AdPs	1	0	0.002
DA21	Parabacteroides_merdae	SPs	1	0	0.005
DA26	Bacteroides_dorei	SPs	1	0	-0.003
DA57	Bacteroides_vulgatus	SPs	1	0	-0.005
DA173	Bacteroides_bouchesdurhonensis	SPs	1	0	0.002
DA320	Bacteroides_cellulosilyticus	SPs	1	0	-0.003
DA347	Bacteroides_sp900066265	SPs	1	0	-0.003
DA486	Bacteroides_fragilis_A	SPs	1	0	0.002
DA505	Bacteroides_ovatus	SPs	1	0	-0.013
DA701	Parabacteroides_johnsonii	SPs	1	0	-0.008
DA729	Parabacteroides_goldsteinii	SPs	1	0	-0.015
DA1114	Bacteroides_eggerthii	SPs	1	0	-0.009
DA1414	Bacteroides_faecis	SPs	1	0	-0.007
DA1439	Bacteroides_sp003545565	SPs	1	0	-0.005
DA1461	Bacteroides_oleiciplenus	SPs	1	0	-0.013
DA104	Parabacteroides_distasonis	SPs	1	0	-0.01
DA16	Bacteroides_thetaiotaomicron	SPs	1	0	-0.002
DA103	Bacteroides_massiliensis	SPs	1	0	-0.009
DA183	Bacteroides_uniformis	SPs	1	0	-0.014
DA557	Bacteroides_fragilis	SPs	1	0	-0.009
DA679	Bacteroides_caccae	SPs	1	0	-0.008
DA816	Bacteroides_stercoris	SPs	1	0	-0.012
DA904	Bacteroides_faecichinchillae	SPs	1	0	-0.009
DA1209	Bacteroides_sartorii	SPs	1	0	-0.009
DA1247	Bacteroides_salyersiae	SPs	1	0	-0.009
DA1479	Bacteroides_intestinalis_A	SPs	1	0	-0.011
DA14	Bacteroides_xylanisolvens	SPs	1	0	-0.008
DA647	Bacteroides_clarus	SPs	1	0	-0.012
DA672	Parabacteroides_faecis	SPs	1	0	-0.013
DA21	Parabacteroides_merdae	RAPs	1	0	0.005
DA26	Bacteroides_dorei	RAPs	1	0	0.011
DA57	Bacteroides_vulgatus	RAPs	1	0	0.006
DA173	Bacteroides_bouchesdurhonensis	RAPs	1	0	0.008
DA320	Bacteroides_cellulosilyticus	RAPs	1	0	0.009
DA347	Bacteroides_sp900066265	RAPs	1	0	0.014
DA486	Bacteroides_fragilis_A	RAPs	1	0	0.013
DA505	Bacteroides_ovatus	RAPs	1	0	-0.002
DA701	Parabacteroides_johnsonii	RAPs	1	0	0
DA729	Parabacteroides_goldsteinii	RAPs	1	0	0.016
DA1114	Bacteroides_eggerthii	RAPs	1	0	0.007
DA1414	Bacteroides_faecis	RAPs	1	0	0.008
DA1439	Bacteroides_sp003545565	RAPs	1	0	0.009
DA1461	Bacteroides_oleiciplenus	RAPs	1	0	0.005
DA104	Parabacteroides_distasonis	RAPs	1	0	0.005
DA16	Bacteroides_thetaiotaomicron	RAPs	1	0	0.008
DA103	Bacteroides_massiliensis	RAPs	1	0	0.01
DA183	Bacteroides_uniformis	RAPs	1	0	0.01
DA557	Bacteroides_fragilis	RAPs	1	0	0.009
DA679	Bacteroides_caccae	RAPs	1	0	-0.002
DA816	Bacteroides_stercoris	RAPs	1	0	-0.001
DA904	Bacteroides_faecichinchillae	RAPs	1	0	-0.001
DA1209	Bacteroides_sartorii	RAPs	1	0	-0.002
DA1247	Bacteroides_salyersiae	RAPs	1	0	-0.004
DA1479	Bacteroides_intestinalis_A	RAPs	1	0	-0.009
DA14	Bacteroides_xylanisolvens	RAPs	1	0	-0.008
DA647	Bacteroides_clarus	RAPs	1	0	-0.001
DA672	Parabacteroides_faecis	RAPs	1	0	-0.007
DA21	Parabacteroides_merdae	PSPs	1	0	0.001
DA26	Bacteroides_dorei	PSPs	1	0	0.003
DA57	Bacteroides_vulgatus	PSPs	1	0	-0.001
DA173	Bacteroides_bouchesdurhonensis	PSPs	1	0	0.002
DA320	Bacteroides_cellulosilyticus	PSPs	1	0	0.003
DA347	Bacteroides_sp900066265	PSPs	1	0	0.013
DA486	Bacteroides_fragilis_A	PSPs	1	0	-0.004
DA505	Bacteroides_ovatus	PSPs	1	0	0.007
DA701	Parabacteroides_johnsonii	PSPs	1	0	0.013
DA729	Parabacteroides_goldsteinii	PSPs	1	0	0.005
DA1114	Bacteroides_eggerthii	PSPs	1	0	-0.005
DA1414	Bacteroides_faecis	PSPs	1	0	-0.001
DA1439	Bacteroides_sp003545565	PSPs	1	0	0.003
DA1461	Bacteroides_oleiciplenus	PSPs	1	0	-0.003
DA104	Parabacteroides_distasonis	PSPs	1	0	0.006
DA16	Bacteroides_thetaiotaomicron	PSPs	1	0	0.001
DA103	Bacteroides_massiliensis	PSPs	1	0	0.006
DA183	Bacteroides_uniformis	PSPs	1	0	0.004
DA557	Bacteroides_fragilis	PSPs	1	0	0.003
DA679	Bacteroides_caccae	PSPs	1	0	0.003
DA816	Bacteroides_stercoris	PSPs	1	0	0.011
DA904	Bacteroides_faecichinchillae	PSPs	1	0	0.001
DA1209	Bacteroides_sartorii	PSPs	1	0	0.001
DA1247	Bacteroides_salyersiae	PSPs	1	0	0.006
DA1479	Bacteroides_intestinalis_A	PSPs	1	0	0
DA14	Bacteroides_xylanisolvens	PSPs	1	0	-0.004
DA647	Bacteroides_clarus	PSPs	1	0	0.011
DA672	Parabacteroides_faecis	PSPs	1	0	0.003
DA21	Parabacteroides_merdae	PLPs	1	0	0.011
DA26	Bacteroides_dorei	PLPs	1	0	0.008
DA57	Bacteroides_vulgatus	PLPs	1	0	0.01
DA173	Bacteroides_bouchesdurhonensis	PLPs	1	0	0.009
DA320	Bacteroides_cellulosilyticus	PLPs	1	0	0.005
DA347	Bacteroides_sp900066265	PLPs	1	0	0.013
DA486	Bacteroides_fragilis_A	PLPs	1	0	0.011
DA505	Bacteroides_ovatus	PLPs	1	0	0.016
DA701	Parabacteroides_johnsonii	PLPs	1	0	0.006
DA729	Parabacteroides_goldsteinii	PLPs	1	0	0.019
DA1114	Bacteroides_eggerthii	PLPs	1	0	0.027
DA1414	Bacteroides_faecis	PLPs	1	0	0.017
DA1439	Bacteroides_sp003545565	PLPs	1	0	0.007
DA1461	Bacteroides_oleiciplenus	PLPs	1	0	0.021
DA104	Parabacteroides_distasonis	PLPs	1	0	0.022
DA16	Bacteroides_thetaiotaomicron	PLPs	1	0	0.013
DA103	Bacteroides_massiliensis	PLPs	1	0	0.019
DA183	Bacteroides_uniformis	PLPs	1	0	0.005
DA557	Bacteroides_fragilis	PLPs	1	0	0.011
DA679	Bacteroides_caccae	PLPs	1	0	0.011
DA816	Bacteroides_stercoris	PLPs	1	0	0.012
DA904	Bacteroides_faecichinchillae	PLPs	1	0	0.013
DA1209	Bacteroides_sartorii	PLPs	1	0	0.017
DA1247	Bacteroides_salyersiae	PLPs	1	0	-0.005
DA1479	Bacteroides_intestinalis_A	PLPs	1	0	-0.002
DA14	Bacteroides_xylanisolvens	PLPs	1	0	0.007
DA647	Bacteroides_clarus	PLPs	1	0	0.021
DA672	Parabacteroides_faecis	PLPs	1	0	0.013
DA21	Parabacteroides_merdae	AnPs	1	0	0.015
DA26	Bacteroides_dorei	AnPs	1	0	0.02
DA57	Bacteroides_vulgatus	AnPs	1	0	0.012
DA173	Bacteroides_bouchesdurhonensis	AnPs	1	0	0.004
DA320	Bacteroides_cellulosilyticus	AnPs	1	0	0.017
DA347	Bacteroides_sp900066265	AnPs	1	0	0.014
DA486	Bacteroides_fragilis_A	AnPs	1	0	0.013
DA505	Bacteroides_ovatus	AnPs	1	0	0.005
DA701	Parabacteroides_johnsonii	AnPs	1	0	0.017
DA729	Parabacteroides_goldsteinii	AnPs	1	0	0.011
DA1114	Bacteroides_eggerthii	AnPs	1	0	0.018
DA1414	Bacteroides_faecis	AnPs	1	0	0.005
DA1439	Bacteroides_sp003545565	AnPs	1	0	0.002
DA1461	Bacteroides_oleiciplenus	AnPs	1	0	0.001
DA104	Parabacteroides_distasonis	AnPs	1	0	0.002
DA16	Bacteroides_thetaiotaomicron	AnPs	1	0	0.008
DA103	Bacteroides_massiliensis	AnPs	1	0	0.002
DA183	Bacteroides_uniformis	AnPs	1	0	0.008
DA557	Bacteroides_fragilis	AnPs	1	0	0.016
DA679	Bacteroides_caccae	AnPs	1	0	0.015
DA816	Bacteroides_stercoris	AnPs	1	0	0.011
DA904	Bacteroides_faecichinchillae	AnPs	1	0	0.009
DA1209	Bacteroides_sartorii	AnPs	1	0	0.004
DA1247	Bacteroides_salyersiae	AnPs	1	0	0.009
DA1479	Bacteroides_intestinalis_A	AnPs	1	0	-0.011
DA14	Bacteroides_xylanisolvens	AnPs	1	0	0.007
DA647	Bacteroides_clarus	AnPs	1	0	-0.004
DA672	Parabacteroides_faecis	AnPs	1	0	0.006
DA21	Parabacteroides_merdae	PPs	1	0	0.007
DA26	Bacteroides_dorei	PPs	1	0	0.012
DA57	Bacteroides_vulgatus	PPs	1	0	0.013
DA173	Bacteroides_bouchesdurhonensis	PPs	1	0	0.009
DA320	Bacteroides_cellulosilyticus	PPs	1	0	0.02
DA347	Bacteroides_sp900066265	PPs	1	0	0.007
DA486	Bacteroides_fragilis_A	PPs	1	0	0.016
DA505	Bacteroides_ovatus	PPs	1	0	0.009
DA701	Parabacteroides_johnsonii	PPs	1	0	0.022
DA729	Parabacteroides_goldsteinii	PPs	1	0	0.006
DA1114	Bacteroides_eggerthii	PPs	1	0	0.021
DA1414	Bacteroides_faecis	PPs	1	0	0.009
DA1439	Bacteroides_sp003545565	PPs	1	0	0.011
DA1461	Bacteroides_oleiciplenus	PPs	1	0	0.02
DA104	Parabacteroides_distasonis	PPs	1	0	0.009
DA16	Bacteroides_thetaiotaomicron	PPs	1	0	0.022
DA103	Bacteroides_massiliensis	PPs	1	0	0.005
DA183	Bacteroides_uniformis	PPs	1	0	0.008
DA557	Bacteroides_fragilis	PPs	1	0	0.02
DA679	Bacteroides_caccae	PPs	1	0	0.007
DA816	Bacteroides_stercoris	PPs	1	0	0.006
DA904	Bacteroides_faecichinchillae	PPs	1	0	0.01
DA1209	Bacteroides_sartorii	PPs	1	0	0.02
DA1247	Bacteroides_salyersiae	PPs	1	0	0.023
DA1479	Bacteroides_intestinalis_A	PPs	1	0	0.011
DA14	Bacteroides_xylanisolvens	PPs	1	0	0.005
DA647	Bacteroides_clarus	PPs	1	0	0.009
DA672	Parabacteroides_faecis	PPs	1	0	0.019
DA21	Parabacteroides_merdae	HAPs	1	0	0.008
DA26	Bacteroides_dorei	HAPs	1	0	0.01
DA57	Bacteroides_vulgatus	HAPs	1	0	0.012
DA173	Bacteroides_bouchesdurhonensis	HAPs	1	0	0.011
DA320	Bacteroides_cellulosilyticus	HAPs	1	0	0.01
DA347	Bacteroides_sp900066265	HAPs	1	0	0.012
DA486	Bacteroides_fragilis_A	HAPs	1	0	0.01
DA505	Bacteroides_ovatus	HAPs	1	0	0.012
DA701	Parabacteroides_johnsonii	HAPs	1	0	-0.004
DA729	Parabacteroides_goldsteinii	HAPs	1	0	0.009
DA1114	Bacteroides_eggerthii	HAPs	1	0	0.008
DA1414	Bacteroides_faecis	HAPs	1	0	0.011
DA1439	Bacteroides_sp003545565	HAPs	1	0	0.013
DA1461	Bacteroides_oleiciplenus	HAPs	1	0	0.012
DA104	Parabacteroides_distasonis	HAPs	1	0	0.014
DA16	Bacteroides_thetaiotaomicron	HAPs	1	0	0.006
DA103	Bacteroides_massiliensis	HAPs	1	0	0.002
DA183	Bacteroides_uniformis	HAPs	1	0	0.007
DA557	Bacteroides_fragilis	HAPs	1	0	0.008
DA679	Bacteroides_caccae	HAPs	1	0	0.008
DA816	Bacteroides_stercoris	HAPs	1	0	0.01
DA904	Bacteroides_faecichinchillae	HAPs	1	0	0.007
DA1209	Bacteroides_sartorii	HAPs	1	0	0.007
DA1247	Bacteroides_salyersiae	HAPs	1	0	0.006
DA1479	Bacteroides_intestinalis_A	HAPs	1	0	0.004
DA14	Bacteroides_xylanisolvens	HAPs	1	0	-0.008
DA647	Bacteroides_clarus	HAPs	1	0	0.001
DA672	Parabacteroides_faecis	HAPs	1	0	-0.002
DA21	Parabacteroides_merdae	GPs_mix	1	0	0.005
DA26	Bacteroides_dorei	GPs_mix	1	0	0.014
DA57	Bacteroides_vulgatus	GPs_mix	1	0	0.015
DA173	Bacteroides_bouchesdurhonensis	GPs_mix	1	0	0.015
DA320	Bacteroides_cellulosilyticus	GPs_mix	1	0	0.007
DA347	Bacteroides_sp900066265	GPs_mix	1	0	0.011
DA486	Bacteroides_fragilis_A	GPs_mix	1	0	0.011
DA505	Bacteroides_ovatus	GPs_mix	1	0	0.016
DA701	Parabacteroides_johnsonii	GPs_mix	1	0	0.011
DA729	Parabacteroides_goldsteinii	GPs_mix	1	0	0.009
DA1114	Bacteroides_eggerthii	GPs_mix	1	0	0.01
DA1414	Bacteroides_faecis	GPs_mix	1	0	0.004
DA1439	Bacteroides_sp003545565	GPs_mix	1	0	0.009
DA1461	Bacteroides_oleiciplenus	GPs_mix	1	0	0.017
DA104	Parabacteroides_distasonis	GPs_mix	1	0	0.011
DA16	Bacteroides_thetaiotaomicron	GPs_mix	1	0	0.02
DA103	Bacteroides_massiliensis	GPs_mix	1	0	0.019
DA183	Bacteroides_uniformis	GPs_mix	1	0	0.016
DA557	Bacteroides_fragilis	GPs_mix	1	0	0.015
DA679	Bacteroides_caccae	GPs_mix	1	0	0.019
DA816	Bacteroides_stercoris	GPs_mix	1	0	0.02
DA904	Bacteroides_faecichinchillae	GPs_mix	1	0	0.004
DA1209	Bacteroides_sartorii	GPs_mix	1	0	0.006
DA1247	Bacteroides_salyersiae	GPs_mix	1	0	0.012
DA1479	Bacteroides_intestinalis_A	GPs_mix	1	0	0.006
DA14	Bacteroides_xylanisolvens	GPs_mix	1	0	0.009
DA647	Bacteroides_clarus	GPs_mix	1	0	0.009
DA672	Parabacteroides_faecis	GPs_mix	1	0	0.008
DA21	Parabacteroides_merdae	GPs_S	1	0	0.011
DA26	Bacteroides_dorei	GPs_S	1	0	0.012
DA57	Bacteroides_vulgatus	GPs_S	1	0	0.009
DA173	Bacteroides_bouchesdurhonensis	GPs_S	1	0	0.007
DA320	Bacteroides_cellulosilyticus	GPs_S	1	0	0.008
DA347	Bacteroides_sp900066265	GPs_S	1	0	0
DA486	Bacteroides_fragilis_A	GPs_S	1	0	0.011
DA505	Bacteroides_ovatus	GPs_S	1	0	0.014
DA701	Parabacteroides_johnsonii	GPs_S	1	0	0.01
DA729	Parabacteroides_goldsteinii	GPs_S	1	0	0.009
DA1114	Bacteroides_eggerthii	GPs_S	1	0	0.01
DA1414	Bacteroides_faecis	GPs_S	1	0	0.012
DA1439	Bacteroides_sp003545565	GPs_S	1	0	0.011
DA1461	Bacteroides_oleiciplenus	GPs_S	1	0	0.009
DA104	Parabacteroides_distasonis	GPs_S	1	0	0.009
DA16	Bacteroides_thetaiotaomicron	GPs_S	1	0	0.012
DA103	Bacteroides_massiliensis	GPs_S	1	0	0.018
DA183	Bacteroides_uniformis	GPs_S	1	0	0.006
DA557	Bacteroides_fragilis	GPs_S	1	0	0.012
DA679	Bacteroides_caccae	GPs_S	1	0	0.009
DA816	Bacteroides_stercoris	GPs_S	1	0	0.006
DA904	Bacteroides_faecichinchillae	GPs_S	1	0	0.009
DA1209	Bacteroides_sartorii	GPs_S	1	0	0.009
DA1247	Bacteroides_salyersiae	GPs_S	1	0	0.007
DA1479	Bacteroides_intestinalis_A	GPs_S	1	0	0.008
DA14	Bacteroides_xylanisolvens	GPs_S	1	0	0.012
DA647	Bacteroides_clarus	GPs_S	1	0	0.015
DA672	Parabacteroides_faecis	GPs_S	1	0	0.015
DA21	Parabacteroides_merdae	GPs_L	1	0	-0.003
DA26	Bacteroides_dorei	GPs_L	1	0	0
DA57	Bacteroides_vulgatus	GPs_L	1	0	-0.007
DA173	Bacteroides_bouchesdurhonensis	GPs_L	1	0	-0.002
DA320	Bacteroides_cellulosilyticus	GPs_L	1	0	-0.001
DA347	Bacteroides_sp900066265	GPs_L	1	0	0.01
DA486	Bacteroides_fragilis_A	GPs_L	1	0	0.008
DA505	Bacteroides_ovatus	GPs_L	1	0	0.013
DA701	Parabacteroides_johnsonii	GPs_L	1	0	0.003
DA729	Parabacteroides_goldsteinii	GPs_L	1	0	0.004
DA1114	Bacteroides_eggerthii	GPs_L	1	0	0.005
DA1414	Bacteroides_faecis	GPs_L	1	0	0.002
DA1439	Bacteroides_sp003545565	GPs_L	1	0	0.001
DA1461	Bacteroides_oleiciplenus	GPs_L	1	0	0.006
DA104	Parabacteroides_distasonis	GPs_L	1	0	0.009
DA16	Bacteroides_thetaiotaomicron	GPs_L	1	0	0.002
DA103	Bacteroides_massiliensis	GPs_L	1	0	-0.002
DA183	Bacteroides_uniformis	GPs_L	1	0	0.008
DA557	Bacteroides_fragilis	GPs_L	1	0	-0.008
DA679	Bacteroides_caccae	GPs_L	1	0	-0.001
DA816	Bacteroides_stercoris	GPs_L	1	0	0.002
DA904	Bacteroides_faecichinchillae	GPs_L	1	0	0.006
DA1209	Bacteroides_sartorii	GPs_L	1	0	-0.002
DA1247	Bacteroides_salyersiae	GPs_L	1	0	0.007
DA1479	Bacteroides_intestinalis_A	GPs_L	1	0	0.008
DA14	Bacteroides_xylanisolvens	GPs_L	1	0	0.003
DA647	Bacteroides_clarus	GPs_L	1	0	0.006
DA672	Parabacteroides_faecis	GPs_L	1	0	0.006
DA21	Parabacteroides_merdae	NC	1	12	0.006
DA26	Bacteroides_dorei	NC	1	12	0.032
DA57	Bacteroides_vulgatus	NC	1	12	0.035
DA173	Bacteroides_bouchesdurhonensis	NC	1	12	0.013
DA320	Bacteroides_cellulosilyticus	NC	1	12	0.034
DA347	Bacteroides_sp900066265	NC	1	12	0.035
DA486	Bacteroides_fragilis_A	NC	1	12	0.015
DA505	Bacteroides_ovatus	NC	1	12	0.001
DA701	Parabacteroides_johnsonii	NC	1	12	0.03
DA729	Parabacteroides_goldsteinii	NC	1	12	0.036
DA1114	Bacteroides_eggerthii	NC	1	12	0.013
DA1414	Bacteroides_faecis	NC	1	12	0.005
DA1439	Bacteroides_sp003545565	NC	1	12	0.009
DA1461	Bacteroides_oleiciplenus	NC	1	12	0.005
DA104	Parabacteroides_distasonis	NC	1	12	0.006
DA16	Bacteroides_thetaiotaomicron	NC	1	12	0.008
DA103	Bacteroides_massiliensis	NC	1	12	0.006
DA183	Bacteroides_uniformis	NC	1	12	-0.003
DA557	Bacteroides_fragilis	NC	1	12	0.006
DA679	Bacteroides_caccae	NC	1	12	0.007
DA816	Bacteroides_stercoris	NC	1	12	0.013
DA904	Bacteroides_faecichinchillae	NC	1	12	0.008
DA1209	Bacteroides_sartorii	NC	1	12	0.005
DA1247	Bacteroides_salyersiae	NC	1	12	0.002
DA1479	Bacteroides_intestinalis_A	NC	1	12	0.007
DA14	Bacteroides_xylanisolvens	NC	1	12	0.006
DA647	Bacteroides_clarus	NC	1	12	0.004
DA672	Parabacteroides_faecis	NC	1	12	0.007
DA21	Parabacteroides_merdae	RNPs	1	12	0.074
DA26	Bacteroides_dorei	RNPs	1	12	0.213
DA57	Bacteroides_vulgatus	RNPs	1	12	0.152
DA173	Bacteroides_bouchesdurhonensis	RNPs	1	12	0.106
DA320	Bacteroides_cellulosilyticus	RNPs	1	12	0.09
DA347	Bacteroides_sp900066265	RNPs	1	12	0.22
DA486	Bacteroides_fragilis_A	RNPs	1	12	0.081
DA505	Bacteroides_ovatus	RNPs	1	12	0.353
DA701	Parabacteroides_johnsonii	RNPs	1	12	0.027
DA729	Parabacteroides_goldsteinii	RNPs	1	12	0.046
DA1114	Bacteroides_eggerthii	RNPs	1	12	0.258
DA1414	Bacteroides_faecis	RNPs	1	12	0.217
DA1439	Bacteroides_sp003545565	RNPs	1	12	0.25
DA1461	Bacteroides_oleiciplenus	RNPs	1	12	0.295
DA104	Parabacteroides_distasonis	RNPs	1	12	0.05
DA16	Bacteroides_thetaiotaomicron	RNPs	1	12	0.167
DA103	Bacteroides_massiliensis	RNPs	1	12	-0.006
DA183	Bacteroides_uniformis	RNPs	1	12	0.08
DA557	Bacteroides_fragilis	RNPs	1	12	0.06
DA679	Bacteroides_caccae	RNPs	1	12	0.051
DA816	Bacteroides_stercoris	RNPs	1	12	0.013
DA904	Bacteroides_faecichinchillae	RNPs	1	12	0
DA1209	Bacteroides_sartorii	RNPs	1	12	0.042
DA1247	Bacteroides_salyersiae	RNPs	1	12	0.066
DA1479	Bacteroides_intestinalis_A	RNPs	1	12	0.04
DA14	Bacteroides_xylanisolvens	RNPs	1	12	0.165
DA647	Bacteroides_clarus	RNPs	1	12	0.053
DA672	Parabacteroides_faecis	RNPs	1	12	0.08
DA21	Parabacteroides_merdae	PQPs	1	12	0.019
DA26	Bacteroides_dorei	PQPs	1	12	0.319
DA57	Bacteroides_vulgatus	PQPs	1	12	0.275
DA173	Bacteroides_bouchesdurhonensis	PQPs	1	12	0.079
DA320	Bacteroides_cellulosilyticus	PQPs	1	12	0.116
DA347	Bacteroides_sp900066265	PQPs	1	12	0.2
DA486	Bacteroides_fragilis_A	PQPs	1	12	0.037
DA505	Bacteroides_ovatus	PQPs	1	12	0.347
DA701	Parabacteroides_johnsonii	PQPs	1	12	0.166
DA729	Parabacteroides_goldsteinii	PQPs	1	12	0.167
DA1114	Bacteroides_eggerthii	PQPs	1	12	0.259
DA1414	Bacteroides_faecis	PQPs	1	12	0.256
DA1439	Bacteroides_sp003545565	PQPs	1	12	0.443
DA1461	Bacteroides_oleiciplenus	PQPs	1	12	0.278
DA104	Parabacteroides_distasonis	PQPs	1	12	0.003
DA16	Bacteroides_thetaiotaomicron	PQPs	1	12	0.252
DA103	Bacteroides_massiliensis	PQPs	1	12	-0.002
DA183	Bacteroides_uniformis	PQPs	1	12	-0.002
DA557	Bacteroides_fragilis	PQPs	1	12	0.168
DA679	Bacteroides_caccae	PQPs	1	12	0.098
DA816	Bacteroides_stercoris	PQPs	1	12	0.341
DA904	Bacteroides_faecichinchillae	PQPs	1	12	0.013
DA1209	Bacteroides_sartorii	PQPs	1	12	0.199
DA1247	Bacteroides_salyersiae	PQPs	1	12	0.356
DA1479	Bacteroides_intestinalis_A	PQPs	1	12	0.241
DA14	Bacteroides_xylanisolvens	PQPs	1	12	0.101
DA647	Bacteroides_clarus	PQPs	1	12	0.147
DA672	Parabacteroides_faecis	PQPs	1	12	-0.004
DA21	Parabacteroides_merdae	RPPs	1	12	0.016
DA26	Bacteroides_dorei	RPPs	1	12	0.133
DA57	Bacteroides_vulgatus	RPPs	1	12	0.112
DA173	Bacteroides_bouchesdurhonensis	RPPs	1	12	0.044
DA320	Bacteroides_cellulosilyticus	RPPs	1	12	0.022
DA347	Bacteroides_sp900066265	RPPs	1	12	0.069
DA486	Bacteroides_fragilis_A	RPPs	1	12	0.046
DA505	Bacteroides_ovatus	RPPs	1	12	0.102
DA701	Parabacteroides_johnsonii	RPPs	1	12	-0.04
DA729	Parabacteroides_goldsteinii	RPPs	1	12	-0.026
DA1114	Bacteroides_eggerthii	RPPs	1	12	0.01
DA1414	Bacteroides_faecis	RPPs	1	12	-0.046
DA1439	Bacteroides_sp003545565	RPPs	1	12	0.277
DA1461	Bacteroides_oleiciplenus	RPPs	1	12	0.256
DA104	Parabacteroides_distasonis	RPPs	1	12	0
DA16	Bacteroides_thetaiotaomicron	RPPs	1	12	0.027
DA103	Bacteroides_massiliensis	RPPs	1	12	0.003
DA183	Bacteroides_uniformis	RPPs	1	12	0.002
DA557	Bacteroides_fragilis	RPPs	1	12	0.212
DA679	Bacteroides_caccae	RPPs	1	12	0.205
DA816	Bacteroides_stercoris	RPPs	1	12	0.184
DA904	Bacteroides_faecichinchillae	RPPs	1	12	0.065
DA1209	Bacteroides_sartorii	RPPs	1	12	0.131
DA1247	Bacteroides_salyersiae	RPPs	1	12	0.043
DA1479	Bacteroides_intestinalis_A	RPPs	1	12	0.044
DA14	Bacteroides_xylanisolvens	RPPs	1	12	0.223
DA647	Bacteroides_clarus	RPPs	1	12	0.002
DA672	Parabacteroides_faecis	RPPs	1	12	0.002
DA21	Parabacteroides_merdae	CPPs	1	12	0.003
DA26	Bacteroides_dorei	CPPs	1	12	0.058
DA57	Bacteroides_vulgatus	CPPs	1	12	0.069
DA173	Bacteroides_bouchesdurhonensis	CPPs	1	12	-0.003
DA320	Bacteroides_cellulosilyticus	CPPs	1	12	-0.003
DA347	Bacteroides_sp900066265	CPPs	1	12	0.084
DA486	Bacteroides_fragilis_A	CPPs	1	12	0.157
DA505	Bacteroides_ovatus	CPPs	1	12	0.512
DA701	Parabacteroides_johnsonii	CPPs	1	12	-0.004
DA729	Parabacteroides_goldsteinii	CPPs	1	12	0.083
DA1114	Bacteroides_eggerthii	CPPs	1	12	-0.002
DA1414	Bacteroides_faecis	CPPs	1	12	0.417
DA1439	Bacteroides_sp003545565	CPPs	1	12	-0.001
DA1461	Bacteroides_oleiciplenus	CPPs	1	12	0.001
DA104	Parabacteroides_distasonis	CPPs	1	12	-0.002
DA16	Bacteroides_thetaiotaomicron	CPPs	1	12	-0.001
DA103	Bacteroides_massiliensis	CPPs	1	12	0.008
DA183	Bacteroides_uniformis	CPPs	1	12	0.01
DA557	Bacteroides_fragilis	CPPs	1	12	0.423
DA679	Bacteroides_caccae	CPPs	1	12	0.465
DA816	Bacteroides_stercoris	CPPs	1	12	0.427
DA904	Bacteroides_faecichinchillae	CPPs	1	12	0.021
DA1209	Bacteroides_sartorii	CPPs	1	12	0.505
DA1247	Bacteroides_salyersiae	CPPs	1	12	0.345
DA1479	Bacteroides_intestinalis_A	CPPs	1	12	0
DA14	Bacteroides_xylanisolvens	CPPs	1	12	0.039
DA647	Bacteroides_clarus	CPPs	1	12	0.031
DA672	Parabacteroides_faecis	CPPs	1	12	-0.001
DA21	Parabacteroides_merdae	AdPs	1	12	0.051
DA26	Bacteroides_dorei	AdPs	1	12	0.324
DA57	Bacteroides_vulgatus	AdPs	1	12	0.299
DA173	Bacteroides_bouchesdurhonensis	AdPs	1	12	0.011
DA320	Bacteroides_cellulosilyticus	AdPs	1	12	0.007
DA347	Bacteroides_sp900066265	AdPs	1	12	0.379
DA486	Bacteroides_fragilis_A	AdPs	1	12	0.059
DA505	Bacteroides_ovatus	AdPs	1	12	0.414
DA701	Parabacteroides_johnsonii	AdPs	1	12	0.02
DA729	Parabacteroides_goldsteinii	AdPs	1	12	0.053
DA1114	Bacteroides_eggerthii	AdPs	1	12	0.238
DA1414	Bacteroides_faecis	AdPs	1	12	0.225
DA1439	Bacteroides_sp003545565	AdPs	1	12	0.267
DA1461	Bacteroides_oleiciplenus	AdPs	1	12	0.065
DA104	Parabacteroides_distasonis	AdPs	1	12	0.057
DA16	Bacteroides_thetaiotaomicron	AdPs	1	12	0.229
DA103	Bacteroides_massiliensis	AdPs	1	12	0.064
DA183	Bacteroides_uniformis	AdPs	1	12	0.046
DA557	Bacteroides_fragilis	AdPs	1	12	0.263
DA679	Bacteroides_caccae	AdPs	1	12	0.061
DA816	Bacteroides_stercoris	AdPs	1	12	0.27
DA904	Bacteroides_faecichinchillae	AdPs	1	12	0.045
DA1209	Bacteroides_sartorii	AdPs	1	12	0.087
DA1247	Bacteroides_salyersiae	AdPs	1	12	0.331
DA1479	Bacteroides_intestinalis_A	AdPs	1	12	0.256
DA14	Bacteroides_xylanisolvens	AdPs	1	12	0.267
DA647	Bacteroides_clarus	AdPs	1	12	0.047
DA672	Parabacteroides_faecis	AdPs	1	12	0.048
DA21	Parabacteroides_merdae	SPs	1	12	0.039
DA26	Bacteroides_dorei	SPs	1	12	0.456
DA57	Bacteroides_vulgatus	SPs	1	12	0.199
DA173	Bacteroides_bouchesdurhonensis	SPs	1	12	0.133
DA320	Bacteroides_cellulosilyticus	SPs	1	12	0.16
DA347	Bacteroides_sp900066265	SPs	1	12	0.116
DA486	Bacteroides_fragilis_A	SPs	1	12	0.253
DA505	Bacteroides_ovatus	SPs	1	12	0.326
DA701	Parabacteroides_johnsonii	SPs	1	12	0.008
DA729	Parabacteroides_goldsteinii	SPs	1	12	0.007
DA1114	Bacteroides_eggerthii	SPs	1	12	0.015
DA1414	Bacteroides_faecis	SPs	1	12	0.006
DA1439	Bacteroides_sp003545565	SPs	1	12	0.39
DA1461	Bacteroides_oleiciplenus	SPs	1	12	0.365
DA104	Parabacteroides_distasonis	SPs	1	12	0.339
DA16	Bacteroides_thetaiotaomicron	SPs	1	12	0.185
DA103	Bacteroides_massiliensis	SPs	1	12	0.078
DA183	Bacteroides_uniformis	SPs	1	12	0.06
DA557	Bacteroides_fragilis	SPs	1	12	0.401
DA679	Bacteroides_caccae	SPs	1	12	0.014
DA816	Bacteroides_stercoris	SPs	1	12	0.004
DA904	Bacteroides_faecichinchillae	SPs	1	12	0.043
DA1209	Bacteroides_sartorii	SPs	1	12	0.003
DA1247	Bacteroides_salyersiae	SPs	1	12	0.047
DA1479	Bacteroides_intestinalis_A	SPs	1	12	0.29
DA14	Bacteroides_xylanisolvens	SPs	1	12	0.304
DA647	Bacteroides_clarus	SPs	1	12	0.006
DA672	Parabacteroides_faecis	SPs	1	12	0.002
DA21	Parabacteroides_merdae	RAPs	1	12	-0.011
DA26	Bacteroides_dorei	RAPs	1	12	0.029
DA57	Bacteroides_vulgatus	RAPs	1	12	0.026
DA173	Bacteroides_bouchesdurhonensis	RAPs	1	12	0.023
DA320	Bacteroides_cellulosilyticus	RAPs	1	12	0.057
DA347	Bacteroides_sp900066265	RAPs	1	12	0.172
DA486	Bacteroides_fragilis_A	RAPs	1	12	0.026
DA505	Bacteroides_ovatus	RAPs	1	12	0.444
DA701	Parabacteroides_johnsonii	RAPs	1	12	0.253
DA729	Parabacteroides_goldsteinii	RAPs	1	12	0.246
DA1114	Bacteroides_eggerthii	RAPs	1	12	0.019
DA1414	Bacteroides_faecis	RAPs	1	12	0.359
DA1439	Bacteroides_sp003545565	RAPs	1	12	0.225
DA1461	Bacteroides_oleiciplenus	RAPs	1	12	0.34
DA104	Parabacteroides_distasonis	RAPs	1	12	0.247
DA16	Bacteroides_thetaiotaomicron	RAPs	1	12	0.253
DA103	Bacteroides_massiliensis	RAPs	1	12	0.027
DA183	Bacteroides_uniformis	RAPs	1	12	0.042
DA557	Bacteroides_fragilis	RAPs	1	12	0.127
DA679	Bacteroides_caccae	RAPs	1	12	0.172
DA816	Bacteroides_stercoris	RAPs	1	12	0.147
DA904	Bacteroides_faecichinchillae	RAPs	1	12	0.009
DA1209	Bacteroides_sartorii	RAPs	1	12	0.38
DA1247	Bacteroides_salyersiae	RAPs	1	12	0.204
DA1479	Bacteroides_intestinalis_A	RAPs	1	12	0.006
DA14	Bacteroides_xylanisolvens	RAPs	1	12	0.011
DA647	Bacteroides_clarus	RAPs	1	12	0.008
DA672	Parabacteroides_faecis	RAPs	1	12	0.001
DA21	Parabacteroides_merdae	PSPs	1	12	0.018
DA26	Bacteroides_dorei	PSPs	1	12	0.019
DA57	Bacteroides_vulgatus	PSPs	1	12	0.021
DA173	Bacteroides_bouchesdurhonensis	PSPs	1	12	0.037
DA320	Bacteroides_cellulosilyticus	PSPs	1	12	0.029
DA347	Bacteroides_sp900066265	PSPs	1	12	0.127
DA486	Bacteroides_fragilis_A	PSPs	1	12	0
DA505	Bacteroides_ovatus	PSPs	1	12	0.187
DA701	Parabacteroides_johnsonii	PSPs	1	12	0.002
DA729	Parabacteroides_goldsteinii	PSPs	1	12	0.048
DA1114	Bacteroides_eggerthii	PSPs	1	12	0.018
DA1414	Bacteroides_faecis	PSPs	1	12	0.011
DA1439	Bacteroides_sp003545565	PSPs	1	12	0.003
DA1461	Bacteroides_oleiciplenus	PSPs	1	12	0.082
DA104	Parabacteroides_distasonis	PSPs	1	12	-0.003
DA16	Bacteroides_thetaiotaomicron	PSPs	1	12	0.024
DA103	Bacteroides_massiliensis	PSPs	1	12	0.007
DA183	Bacteroides_uniformis	PSPs	1	12	0.002
DA557	Bacteroides_fragilis	PSPs	1	12	0.039
DA679	Bacteroides_caccae	PSPs	1	12	0.25
DA816	Bacteroides_stercoris	PSPs	1	12	0.088
DA904	Bacteroides_faecichinchillae	PSPs	1	12	0.027
DA1209	Bacteroides_sartorii	PSPs	1	12	-0.005
DA1247	Bacteroides_salyersiae	PSPs	1	12	0.157
DA1479	Bacteroides_intestinalis_A	PSPs	1	12	-0.003
DA14	Bacteroides_xylanisolvens	PSPs	1	12	0.123
DA647	Bacteroides_clarus	PSPs	1	12	0.015
DA672	Parabacteroides_faecis	PSPs	1	12	-0.004
DA21	Parabacteroides_merdae	PLPs	1	12	0.053
DA26	Bacteroides_dorei	PLPs	1	12	0.117
DA57	Bacteroides_vulgatus	PLPs	1	12	0.107
DA173	Bacteroides_bouchesdurhonensis	PLPs	1	12	0.039
DA320	Bacteroides_cellulosilyticus	PLPs	1	12	0.036
DA347	Bacteroides_sp900066265	PLPs	1	12	0.02
DA486	Bacteroides_fragilis_A	PLPs	1	12	0.103
DA505	Bacteroides_ovatus	PLPs	1	12	0.105
DA701	Parabacteroides_johnsonii	PLPs	1	12	0.043
DA729	Parabacteroides_goldsteinii	PLPs	1	12	0.181
DA1114	Bacteroides_eggerthii	PLPs	1	12	0.233
DA1414	Bacteroides_faecis	PLPs	1	12	0.22
DA1439	Bacteroides_sp003545565	PLPs	1	12	0.11
DA1461	Bacteroides_oleiciplenus	PLPs	1	12	0.145
DA104	Parabacteroides_distasonis	PLPs	1	12	0.071
DA16	Bacteroides_thetaiotaomicron	PLPs	1	12	0.117
DA103	Bacteroides_massiliensis	PLPs	1	12	0.09
DA183	Bacteroides_uniformis	PLPs	1	12	0.013
DA557	Bacteroides_fragilis	PLPs	1	12	0.027
DA679	Bacteroides_caccae	PLPs	1	12	0.052
DA816	Bacteroides_stercoris	PLPs	1	12	0.001
DA904	Bacteroides_faecichinchillae	PLPs	1	12	0.009
DA1209	Bacteroides_sartorii	PLPs	1	12	0.011
DA1247	Bacteroides_salyersiae	PLPs	1	12	0.06
DA1479	Bacteroides_intestinalis_A	PLPs	1	12	0.099
DA14	Bacteroides_xylanisolvens	PLPs	1	12	0.036
DA647	Bacteroides_clarus	PLPs	1	12	0.026
DA672	Parabacteroides_faecis	PLPs	1	12	0.01
DA21	Parabacteroides_merdae	AnPs	1	12	0.007
DA26	Bacteroides_dorei	AnPs	1	12	0.272
DA57	Bacteroides_vulgatus	AnPs	1	12	0.199
DA173	Bacteroides_bouchesdurhonensis	AnPs	1	12	-0.004
DA320	Bacteroides_cellulosilyticus	AnPs	1	12	0
DA347	Bacteroides_sp900066265	AnPs	1	12	0.243
DA486	Bacteroides_fragilis_A	AnPs	1	12	0.212
DA505	Bacteroides_ovatus	AnPs	1	12	0.246
DA701	Parabacteroides_johnsonii	AnPs	1	12	0.01
DA729	Parabacteroides_goldsteinii	AnPs	1	12	0
DA1114	Bacteroides_eggerthii	AnPs	1	12	0
DA1414	Bacteroides_faecis	AnPs	1	12	0.325
DA1439	Bacteroides_sp003545565	AnPs	1	12	0.319
DA1461	Bacteroides_oleiciplenus	AnPs	1	12	0.299
DA104	Parabacteroides_distasonis	AnPs	1	12	0.281
DA16	Bacteroides_thetaiotaomicron	AnPs	1	12	0.188
DA103	Bacteroides_massiliensis	AnPs	1	12	0.068
DA183	Bacteroides_uniformis	AnPs	1	12	-0.004
DA557	Bacteroides_fragilis	AnPs	1	12	0.238
DA679	Bacteroides_caccae	AnPs	1	12	0.219
DA816	Bacteroides_stercoris	AnPs	1	12	0.367
DA904	Bacteroides_faecichinchillae	AnPs	1	12	-0.003
DA1209	Bacteroides_sartorii	AnPs	1	12	0.13
DA1247	Bacteroides_salyersiae	AnPs	1	12	0.079
DA1479	Bacteroides_intestinalis_A	AnPs	1	12	0.173
DA14	Bacteroides_xylanisolvens	AnPs	1	12	0.225
DA647	Bacteroides_clarus	AnPs	1	12	0.152
DA672	Parabacteroides_faecis	AnPs	1	12	0.224
DA21	Parabacteroides_merdae	PPs	1	12	0.007
DA26	Bacteroides_dorei	PPs	1	12	0.001
DA57	Bacteroides_vulgatus	PPs	1	12	0.023
DA173	Bacteroides_bouchesdurhonensis	PPs	1	12	-0.003
DA320	Bacteroides_cellulosilyticus	PPs	1	12	-0.002
DA347	Bacteroides_sp900066265	PPs	1	12	0.01
DA486	Bacteroides_fragilis_A	PPs	1	12	0.002
DA505	Bacteroides_ovatus	PPs	1	12	-0.006
DA701	Parabacteroides_johnsonii	PPs	1	12	0.195
DA729	Parabacteroides_goldsteinii	PPs	1	12	0.077
DA1114	Bacteroides_eggerthii	PPs	1	12	0.143
DA1414	Bacteroides_faecis	PPs	1	12	0.149
DA1439	Bacteroides_sp003545565	PPs	1	12	0.279
DA1461	Bacteroides_oleiciplenus	PPs	1	12	0.319
DA104	Parabacteroides_distasonis	PPs	1	12	0.261
DA16	Bacteroides_thetaiotaomicron	PPs	1	12	0.078
DA103	Bacteroides_massiliensis	PPs	1	12	-0.001
DA183	Bacteroides_uniformis	PPs	1	12	-0.004
DA557	Bacteroides_fragilis	PPs	1	12	-0.002
DA679	Bacteroides_caccae	PPs	1	12	-0.003
DA816	Bacteroides_stercoris	PPs	1	12	-0.004
DA904	Bacteroides_faecichinchillae	PPs	1	12	0.022
DA1209	Bacteroides_sartorii	PPs	1	12	0.077
DA1247	Bacteroides_salyersiae	PPs	1	12	0.072
DA1479	Bacteroides_intestinalis_A	PPs	1	12	0.135
DA14	Bacteroides_xylanisolvens	PPs	1	12	0.131
DA647	Bacteroides_clarus	PPs	1	12	0.136
DA672	Parabacteroides_faecis	PPs	1	12	0.249
DA21	Parabacteroides_merdae	HAPs	1	12	0.012
DA26	Bacteroides_dorei	HAPs	1	12	0.025
DA57	Bacteroides_vulgatus	HAPs	1	12	0.036
DA173	Bacteroides_bouchesdurhonensis	HAPs	1	12	-0.001
DA320	Bacteroides_cellulosilyticus	HAPs	1	12	0.012
DA347	Bacteroides_sp900066265	HAPs	1	12	0.077
DA486	Bacteroides_fragilis_A	HAPs	1	12	0.025
DA505	Bacteroides_ovatus	HAPs	1	12	0.062
DA701	Parabacteroides_johnsonii	HAPs	1	12	0.011
DA729	Parabacteroides_goldsteinii	HAPs	1	12	0.014
DA1114	Bacteroides_eggerthii	HAPs	1	12	0.049
DA1414	Bacteroides_faecis	HAPs	1	12	0.057
DA1439	Bacteroides_sp003545565	HAPs	1	12	0.06
DA1461	Bacteroides_oleiciplenus	HAPs	1	12	0.063
DA104	Parabacteroides_distasonis	HAPs	1	12	0.061
DA16	Bacteroides_thetaiotaomicron	HAPs	1	12	0.032
DA103	Bacteroides_massiliensis	HAPs	1	12	0.012
DA183	Bacteroides_uniformis	HAPs	1	12	0.022
DA557	Bacteroides_fragilis	HAPs	1	12	0.008
DA679	Bacteroides_caccae	HAPs	1	12	0.019
DA816	Bacteroides_stercoris	HAPs	1	12	0.007
DA904	Bacteroides_faecichinchillae	HAPs	1	12	0.025
DA1209	Bacteroides_sartorii	HAPs	1	12	0.014
DA1247	Bacteroides_salyersiae	HAPs	1	12	0.001
DA1479	Bacteroides_intestinalis_A	HAPs	1	12	0.099
DA14	Bacteroides_xylanisolvens	HAPs	1	12	0.093
DA647	Bacteroides_clarus	HAPs	1	12	0.012
DA672	Parabacteroides_faecis	HAPs	1	12	0.013
DA21	Parabacteroides_merdae	GPs_mix	1	12	0.011
DA26	Bacteroides_dorei	GPs_mix	1	12	0.043
DA57	Bacteroides_vulgatus	GPs_mix	1	12	0.021
DA173	Bacteroides_bouchesdurhonensis	GPs_mix	1	12	0.022
DA320	Bacteroides_cellulosilyticus	GPs_mix	1	12	0.022
DA347	Bacteroides_sp900066265	GPs_mix	1	12	0.045
DA486	Bacteroides_fragilis_A	GPs_mix	1	12	0.028
DA505	Bacteroides_ovatus	GPs_mix	1	12	0.073
DA701	Parabacteroides_johnsonii	GPs_mix	1	12	0
DA729	Parabacteroides_goldsteinii	GPs_mix	1	12	0.001
DA1114	Bacteroides_eggerthii	GPs_mix	1	12	0.089
DA1414	Bacteroides_faecis	GPs_mix	1	12	0.011
DA1439	Bacteroides_sp003545565	GPs_mix	1	12	0.094
DA1461	Bacteroides_oleiciplenus	GPs_mix	1	12	0.085
DA104	Parabacteroides_distasonis	GPs_mix	1	12	0.005
DA16	Bacteroides_thetaiotaomicron	GPs_mix	1	12	0.055
DA103	Bacteroides_massiliensis	GPs_mix	1	12	0.015
DA183	Bacteroides_uniformis	GPs_mix	1	12	0.128
DA557	Bacteroides_fragilis	GPs_mix	1	12	0.084
DA679	Bacteroides_caccae	GPs_mix	1	12	0.009
DA816	Bacteroides_stercoris	GPs_mix	1	12	0.177
DA904	Bacteroides_faecichinchillae	GPs_mix	1	12	0.002
DA1209	Bacteroides_sartorii	GPs_mix	1	12	-0.002
DA1247	Bacteroides_salyersiae	GPs_mix	1	12	0.121
DA1479	Bacteroides_intestinalis_A	GPs_mix	1	12	0.211
DA14	Bacteroides_xylanisolvens	GPs_mix	1	12	0.106
DA647	Bacteroides_clarus	GPs_mix	1	12	0.029
DA672	Parabacteroides_faecis	GPs_mix	1	12	0.029
DA21	Parabacteroides_merdae	GPs_S	1	12	0.004
DA26	Bacteroides_dorei	GPs_S	1	12	0.112
DA57	Bacteroides_vulgatus	GPs_S	1	12	0.009
DA173	Bacteroides_bouchesdurhonensis	GPs_S	1	12	0.015
DA320	Bacteroides_cellulosilyticus	GPs_S	1	12	0.005
DA347	Bacteroides_sp900066265	GPs_S	1	12	0.061
DA486	Bacteroides_fragilis_A	GPs_S	1	12	0.033
DA505	Bacteroides_ovatus	GPs_S	1	12	0.214
DA701	Parabacteroides_johnsonii	GPs_S	1	12	0.002
DA729	Parabacteroides_goldsteinii	GPs_S	1	12	0.031
DA1114	Bacteroides_eggerthii	GPs_S	1	12	0.002
DA1414	Bacteroides_faecis	GPs_S	1	12	0.039
DA1439	Bacteroides_sp003545565	GPs_S	1	12	0.032
DA1461	Bacteroides_oleiciplenus	GPs_S	1	12	0.001
DA104	Parabacteroides_distasonis	GPs_S	1	12	0.004
DA16	Bacteroides_thetaiotaomicron	GPs_S	1	12	0.038
DA103	Bacteroides_massiliensis	GPs_S	1	12	0
DA183	Bacteroides_uniformis	GPs_S	1	12	0.2
DA557	Bacteroides_fragilis	GPs_S	1	12	0.167
DA679	Bacteroides_caccae	GPs_S	1	12	0.012
DA816	Bacteroides_stercoris	GPs_S	1	12	0.168
DA904	Bacteroides_faecichinchillae	GPs_S	1	12	-0.002
DA1209	Bacteroides_sartorii	GPs_S	1	12	0.025
DA1247	Bacteroides_salyersiae	GPs_S	1	12	0.001
DA1479	Bacteroides_intestinalis_A	GPs_S	1	12	0.151
DA14	Bacteroides_xylanisolvens	GPs_S	1	12	0.152
DA647	Bacteroides_clarus	GPs_S	1	12	0.12
DA672	Parabacteroides_faecis	GPs_S	1	12	0.082
DA21	Parabacteroides_merdae	GPs_L	1	12	0.005
DA26	Bacteroides_dorei	GPs_L	1	12	0.246
DA57	Bacteroides_vulgatus	GPs_L	1	12	0.186
DA173	Bacteroides_bouchesdurhonensis	GPs_L	1	12	0
DA320	Bacteroides_cellulosilyticus	GPs_L	1	12	0.005
DA347	Bacteroides_sp900066265	GPs_L	1	12	0.127
DA486	Bacteroides_fragilis_A	GPs_L	1	12	-0.003
DA505	Bacteroides_ovatus	GPs_L	1	12	0.281
DA701	Parabacteroides_johnsonii	GPs_L	1	12	0.003
DA729	Parabacteroides_goldsteinii	GPs_L	1	12	0.039
DA1114	Bacteroides_eggerthii	GPs_L	1	12	0.332
DA1414	Bacteroides_faecis	GPs_L	1	12	0.088
DA1439	Bacteroides_sp003545565	GPs_L	1	12	0.053
DA1461	Bacteroides_oleiciplenus	GPs_L	1	12	0.039
DA104	Parabacteroides_distasonis	GPs_L	1	12	0.025
DA16	Bacteroides_thetaiotaomicron	GPs_L	1	12	0.064
DA103	Bacteroides_massiliensis	GPs_L	1	12	0.035
DA183	Bacteroides_uniformis	GPs_L	1	12	0.216
DA557	Bacteroides_fragilis	GPs_L	1	12	0.288
DA679	Bacteroides_caccae	GPs_L	1	12	0.059
DA816	Bacteroides_stercoris	GPs_L	1	12	0.169
DA904	Bacteroides_faecichinchillae	GPs_L	1	12	0.043
DA1209	Bacteroides_sartorii	GPs_L	1	12	0.154
DA1247	Bacteroides_salyersiae	GPs_L	1	12	0.448
DA1479	Bacteroides_intestinalis_A	GPs_L	1	12	0.096
DA14	Bacteroides_xylanisolvens	GPs_L	1	12	0.129
DA647	Bacteroides_clarus	GPs_L	1	12	0.159
DA672	Parabacteroides_faecis	GPs_L	1	12	0.035
DA21	Parabacteroides_merdae	NC	1	24	0.004
DA26	Bacteroides_dorei	NC	1	24	0.004
DA57	Bacteroides_vulgatus	NC	1	24	-0.001
DA173	Bacteroides_bouchesdurhonensis	NC	1	24	0.003
DA320	Bacteroides_cellulosilyticus	NC	1	24	0.001
DA347	Bacteroides_sp900066265	NC	1	24	0
DA486	Bacteroides_fragilis_A	NC	1	24	-0.001
DA505	Bacteroides_ovatus	NC	1	24	0.002
DA701	Parabacteroides_johnsonii	NC	1	24	0.007
DA729	Parabacteroides_goldsteinii	NC	1	24	0.006
DA1114	Bacteroides_eggerthii	NC	1	24	-0.001
DA1414	Bacteroides_faecis	NC	1	24	0.006
DA1439	Bacteroides_sp003545565	NC	1	24	0.007
DA1461	Bacteroides_oleiciplenus	NC	1	24	0.009
DA104	Parabacteroides_distasonis	NC	1	24	0.017
DA16	Bacteroides_thetaiotaomicron	NC	1	24	0.006
DA103	Bacteroides_massiliensis	NC	1	24	0.006
DA183	Bacteroides_uniformis	NC	1	24	0.002
DA557	Bacteroides_fragilis	NC	1	24	0.005
DA679	Bacteroides_caccae	NC	1	24	0.001
DA816	Bacteroides_stercoris	NC	1	24	0.003
DA904	Bacteroides_faecichinchillae	NC	1	24	0.014
DA1209	Bacteroides_sartorii	NC	1	24	0.005
DA1247	Bacteroides_salyersiae	NC	1	24	-0.001
DA1479	Bacteroides_intestinalis_A	NC	1	24	0.005
DA14	Bacteroides_xylanisolvens	NC	1	24	0.005
DA647	Bacteroides_clarus	NC	1	24	0.003
DA672	Parabacteroides_faecis	NC	1	24	0.003
DA21	Parabacteroides_merdae	RNPs	1	24	0.076
DA26	Bacteroides_dorei	RNPs	1	24	0.348
DA57	Bacteroides_vulgatus	RNPs	1	24	0.209
DA173	Bacteroides_bouchesdurhonensis	RNPs	1	24	0.072
DA320	Bacteroides_cellulosilyticus	RNPs	1	24	0.079
DA347	Bacteroides_sp900066265	RNPs	1	24	0.348
DA486	Bacteroides_fragilis_A	RNPs	1	24	0.09
DA505	Bacteroides_ovatus	RNPs	1	24	0.339
DA701	Parabacteroides_johnsonii	RNPs	1	24	0.071
DA729	Parabacteroides_goldsteinii	RNPs	1	24	0.046
DA1114	Bacteroides_eggerthii	RNPs	1	24	0.535
DA1414	Bacteroides_faecis	RNPs	1	24	0.461
DA1439	Bacteroides_sp003545565	RNPs	1	24	0.407
DA1461	Bacteroides_oleiciplenus	RNPs	1	24	0.347
DA104	Parabacteroides_distasonis	RNPs	1	24	0.042
DA16	Bacteroides_thetaiotaomicron	RNPs	1	24	0.209
DA103	Bacteroides_massiliensis	RNPs	1	24	-0.002
DA183	Bacteroides_uniformis	RNPs	1	24	0.435
DA557	Bacteroides_fragilis	RNPs	1	24	0.325
DA679	Bacteroides_caccae	RNPs	1	24	0.09
DA816	Bacteroides_stercoris	RNPs	1	24	0.258
DA904	Bacteroides_faecichinchillae	RNPs	1	24	0.04
DA1209	Bacteroides_sartorii	RNPs	1	24	0.205
DA1247	Bacteroides_salyersiae	RNPs	1	24	0.342
DA1479	Bacteroides_intestinalis_A	RNPs	1	24	0.06
DA14	Bacteroides_xylanisolvens	RNPs	1	24	0.263
DA647	Bacteroides_clarus	RNPs	1	24	0.056
DA672	Parabacteroides_faecis	RNPs	1	24	0.042
DA21	Parabacteroides_merdae	PQPs	1	24	-0.084
DA26	Bacteroides_dorei	PQPs	1	24	0.321
DA57	Bacteroides_vulgatus	PQPs	1	24	0.276
DA173	Bacteroides_bouchesdurhonensis	PQPs	1	24	0.028
DA320	Bacteroides_cellulosilyticus	PQPs	1	24	0.03
DA347	Bacteroides_sp900066265	PQPs	1	24	0.297
DA486	Bacteroides_fragilis_A	PQPs	1	24	0.007
DA505	Bacteroides_ovatus	PQPs	1	24	0.384
DA701	Parabacteroides_johnsonii	PQPs	1	24	-0.145
DA729	Parabacteroides_goldsteinii	PQPs	1	24	0.161
DA1114	Bacteroides_eggerthii	PQPs	1	24	0.232
DA1414	Bacteroides_faecis	PQPs	1	24	0.37
DA1439	Bacteroides_sp003545565	PQPs	1	24	0.4
DA1461	Bacteroides_oleiciplenus	PQPs	1	24	0.264
DA104	Parabacteroides_distasonis	PQPs	1	24	-0.021
DA16	Bacteroides_thetaiotaomicron	PQPs	1	24	0.361
DA103	Bacteroides_massiliensis	PQPs	1	24	-0.005
DA183	Bacteroides_uniformis	PQPs	1	24	-0.003
DA557	Bacteroides_fragilis	PQPs	1	24	0.135
DA679	Bacteroides_caccae	PQPs	1	24	0.141
DA816	Bacteroides_stercoris	PQPs	1	24	0.215
DA904	Bacteroides_faecichinchillae	PQPs	1	24	0.005
DA1209	Bacteroides_sartorii	PQPs	1	24	0.24
DA1247	Bacteroides_salyersiae	PQPs	1	24	0.276
DA1479	Bacteroides_intestinalis_A	PQPs	1	24	0.106
DA14	Bacteroides_xylanisolvens	PQPs	1	24	0.066
DA647	Bacteroides_clarus	PQPs	1	24	0.137
DA672	Parabacteroides_faecis	PQPs	1	24	0.003
DA21	Parabacteroides_merdae	RPPs	1	24	0.002
DA26	Bacteroides_dorei	RPPs	1	24	0.131
DA57	Bacteroides_vulgatus	RPPs	1	24	0.135
DA173	Bacteroides_bouchesdurhonensis	RPPs	1	24	0.023
DA320	Bacteroides_cellulosilyticus	RPPs	1	24	0.025
DA347	Bacteroides_sp900066265	RPPs	1	24	0.068
DA486	Bacteroides_fragilis_A	RPPs	1	24	0.03
DA505	Bacteroides_ovatus	RPPs	1	24	0.151
DA701	Parabacteroides_johnsonii	RPPs	1	24	0.002
DA729	Parabacteroides_goldsteinii	RPPs	1	24	0.004
DA1114	Bacteroides_eggerthii	RPPs	1	24	0.028
DA1414	Bacteroides_faecis	RPPs	1	24	0.012
DA1439	Bacteroides_sp003545565	RPPs	1	24	0.239
DA1461	Bacteroides_oleiciplenus	RPPs	1	24	0.228
DA104	Parabacteroides_distasonis	RPPs	1	24	0.018
DA16	Bacteroides_thetaiotaomicron	RPPs	1	24	0.013
DA103	Bacteroides_massiliensis	RPPs	1	24	0.003
DA183	Bacteroides_uniformis	RPPs	1	24	0.006
DA557	Bacteroides_fragilis	RPPs	1	24	0.126
DA679	Bacteroides_caccae	RPPs	1	24	0.09
DA816	Bacteroides_stercoris	RPPs	1	24	0.063
DA904	Bacteroides_faecichinchillae	RPPs	1	24	0.077
DA1209	Bacteroides_sartorii	RPPs	1	24	0.117
DA1247	Bacteroides_salyersiae	RPPs	1	24	0.041
DA1479	Bacteroides_intestinalis_A	RPPs	1	24	0.043
DA14	Bacteroides_xylanisolvens	RPPs	1	24	0.231
DA647	Bacteroides_clarus	RPPs	1	24	-0.002
DA672	Parabacteroides_faecis	RPPs	1	24	0
DA21	Parabacteroides_merdae	CPPs	1	24	0.009
DA26	Bacteroides_dorei	CPPs	1	24	0.108
DA57	Bacteroides_vulgatus	CPPs	1	24	0.115
DA173	Bacteroides_bouchesdurhonensis	CPPs	1	24	0.003
DA320	Bacteroides_cellulosilyticus	CPPs	1	24	-0.004
DA347	Bacteroides_sp900066265	CPPs	1	24	0.169
DA486	Bacteroides_fragilis_A	CPPs	1	24	0.423
DA505	Bacteroides_ovatus	CPPs	1	24	0.38
DA701	Parabacteroides_johnsonii	CPPs	1	24	-0.002
DA729	Parabacteroides_goldsteinii	CPPs	1	24	0.089
DA1114	Bacteroides_eggerthii	CPPs	1	24	-0.001
DA1414	Bacteroides_faecis	CPPs	1	24	0.4
DA1439	Bacteroides_sp003545565	CPPs	1	24	0.046
DA1461	Bacteroides_oleiciplenus	CPPs	1	24	0.061
DA104	Parabacteroides_distasonis	CPPs	1	24	0.046
DA16	Bacteroides_thetaiotaomicron	CPPs	1	24	0.052
DA103	Bacteroides_massiliensis	CPPs	1	24	0.009
DA183	Bacteroides_uniformis	CPPs	1	24	0.021
DA557	Bacteroides_fragilis	CPPs	1	24	0.299
DA679	Bacteroides_caccae	CPPs	1	24	0.365
DA816	Bacteroides_stercoris	CPPs	1	24	0.322
DA904	Bacteroides_faecichinchillae	CPPs	1	24	-0.005
DA1209	Bacteroides_sartorii	CPPs	1	24	0.534
DA1247	Bacteroides_salyersiae	CPPs	1	24	0.247
DA1479	Bacteroides_intestinalis_A	CPPs	1	24	0.022
DA14	Bacteroides_xylanisolvens	CPPs	1	24	0.022
DA647	Bacteroides_clarus	CPPs	1	24	0.003
DA672	Parabacteroides_faecis	CPPs	1	24	-0.004
DA21	Parabacteroides_merdae	AdPs	1	24	0.06
DA26	Bacteroides_dorei	AdPs	1	24	0.536
DA57	Bacteroides_vulgatus	AdPs	1	24	0.372
DA173	Bacteroides_bouchesdurhonensis	AdPs	1	24	0.047
DA320	Bacteroides_cellulosilyticus	AdPs	1	24	0.054
DA347	Bacteroides_sp900066265	AdPs	1	24	0.519
DA486	Bacteroides_fragilis_A	AdPs	1	24	0.051
DA505	Bacteroides_ovatus	AdPs	1	24	0.501
DA701	Parabacteroides_johnsonii	AdPs	1	24	0.007
DA729	Parabacteroides_goldsteinii	AdPs	1	24	0.01
DA1114	Bacteroides_eggerthii	AdPs	1	24	0.416
DA1414	Bacteroides_faecis	AdPs	1	24	0.512
DA1439	Bacteroides_sp003545565	AdPs	1	24	0.503
DA1461	Bacteroides_oleiciplenus	AdPs	1	24	0.048
DA104	Parabacteroides_distasonis	AdPs	1	24	0.051
DA16	Bacteroides_thetaiotaomicron	AdPs	1	24	0.377
DA103	Bacteroides_massiliensis	AdPs	1	24	0.054
DA183	Bacteroides_uniformis	AdPs	1	24	0.048
DA557	Bacteroides_fragilis	AdPs	1	24	0.26
DA679	Bacteroides_caccae	AdPs	1	24	0.043
DA816	Bacteroides_stercoris	AdPs	1	24	0.293
DA904	Bacteroides_faecichinchillae	AdPs	1	24	0.018
DA1209	Bacteroides_sartorii	AdPs	1	24	0.087
DA1247	Bacteroides_salyersiae	AdPs	1	24	0.409
DA1479	Bacteroides_intestinalis_A	AdPs	1	24	0.268
DA14	Bacteroides_xylanisolvens	AdPs	1	24	0.394
DA647	Bacteroides_clarus	AdPs	1	24	0.047
DA672	Parabacteroides_faecis	AdPs	1	24	0.054
DA21	Parabacteroides_merdae	SPs	1	24	0.047
DA26	Bacteroides_dorei	SPs	1	24	0.475
DA57	Bacteroides_vulgatus	SPs	1	24	0.262
DA173	Bacteroides_bouchesdurhonensis	SPs	1	24	0.241
DA320	Bacteroides_cellulosilyticus	SPs	1	24	0.251
DA347	Bacteroides_sp900066265	SPs	1	24	0.233
DA486	Bacteroides_fragilis_A	SPs	1	24	0.397
DA505	Bacteroides_ovatus	SPs	1	24	0.445
DA701	Parabacteroides_johnsonii	SPs	1	24	0.022
DA729	Parabacteroides_goldsteinii	SPs	1	24	0.021
DA1114	Bacteroides_eggerthii	SPs	1	24	0.019
DA1414	Bacteroides_faecis	SPs	1	24	0.01
DA1439	Bacteroides_sp003545565	SPs	1	24	0.713
DA1461	Bacteroides_oleiciplenus	SPs	1	24	0.449
DA104	Parabacteroides_distasonis	SPs	1	24	0.391
DA16	Bacteroides_thetaiotaomicron	SPs	1	24	0.02
DA103	Bacteroides_massiliensis	SPs	1	24	-0.002
DA183	Bacteroides_uniformis	SPs	1	24	0.021
DA557	Bacteroides_fragilis	SPs	1	24	0.366
DA679	Bacteroides_caccae	SPs	1	24	0.023
DA816	Bacteroides_stercoris	SPs	1	24	0.036
DA904	Bacteroides_faecichinchillae	SPs	1	24	0.03
DA1209	Bacteroides_sartorii	SPs	1	24	0.024
DA1247	Bacteroides_salyersiae	SPs	1	24	0.019
DA1479	Bacteroides_intestinalis_A	SPs	1	24	0.415
DA14	Bacteroides_xylanisolvens	SPs	1	24	0.529
DA647	Bacteroides_clarus	SPs	1	24	0.025
DA672	Parabacteroides_faecis	SPs	1	24	0.024
DA21	Parabacteroides_merdae	RAPs	1	24	0.013
DA26	Bacteroides_dorei	RAPs	1	24	0.057
DA57	Bacteroides_vulgatus	RAPs	1	24	0.046
DA173	Bacteroides_bouchesdurhonensis	RAPs	1	24	0.048
DA320	Bacteroides_cellulosilyticus	RAPs	1	24	0.072
DA347	Bacteroides_sp900066265	RAPs	1	24	0.311
DA486	Bacteroides_fragilis_A	RAPs	1	24	0.112
DA505	Bacteroides_ovatus	RAPs	1	24	0.447
DA701	Parabacteroides_johnsonii	RAPs	1	24	0.352
DA729	Parabacteroides_goldsteinii	RAPs	1	24	0.372
DA1114	Bacteroides_eggerthii	RAPs	1	24	0.003
DA1414	Bacteroides_faecis	RAPs	1	24	0.598
DA1439	Bacteroides_sp003545565	RAPs	1	24	0.375
DA1461	Bacteroides_oleiciplenus	RAPs	1	24	0.433
DA104	Parabacteroides_distasonis	RAPs	1	24	0.387
DA16	Bacteroides_thetaiotaomicron	RAPs	1	24	0.328
DA103	Bacteroides_massiliensis	RAPs	1	24	-0.006
DA183	Bacteroides_uniformis	RAPs	1	24	-0.004
DA557	Bacteroides_fragilis	RAPs	1	24	0.276
DA679	Bacteroides_caccae	RAPs	1	24	0.252
DA816	Bacteroides_stercoris	RAPs	1	24	0.239
DA904	Bacteroides_faecichinchillae	RAPs	1	24	0.009
DA1209	Bacteroides_sartorii	RAPs	1	24	0.439
DA1247	Bacteroides_salyersiae	RAPs	1	24	0.446
DA1479	Bacteroides_intestinalis_A	RAPs	1	24	0.004
DA14	Bacteroides_xylanisolvens	RAPs	1	24	0.011
DA647	Bacteroides_clarus	RAPs	1	24	0.007
DA672	Parabacteroides_faecis	RAPs	1	24	0.009
DA21	Parabacteroides_merdae	PSPs	1	24	0.056
DA26	Bacteroides_dorei	PSPs	1	24	0.026
DA57	Bacteroides_vulgatus	PSPs	1	24	0.012
DA173	Bacteroides_bouchesdurhonensis	PSPs	1	24	0.034
DA320	Bacteroides_cellulosilyticus	PSPs	1	24	0.017
DA347	Bacteroides_sp900066265	PSPs	1	24	0.3
DA486	Bacteroides_fragilis_A	PSPs	1	24	0.094
DA505	Bacteroides_ovatus	PSPs	1	24	0.299
DA701	Parabacteroides_johnsonii	PSPs	1	24	0.018
DA729	Parabacteroides_goldsteinii	PSPs	1	24	0.039
DA1114	Bacteroides_eggerthii	PSPs	1	24	0.049
DA1414	Bacteroides_faecis	PSPs	1	24	0.069
DA1439	Bacteroides_sp003545565	PSPs	1	24	0.078
DA1461	Bacteroides_oleiciplenus	PSPs	1	24	0.203
DA104	Parabacteroides_distasonis	PSPs	1	24	0.042
DA16	Bacteroides_thetaiotaomicron	PSPs	1	24	0.134
DA103	Bacteroides_massiliensis	PSPs	1	24	0.066
DA183	Bacteroides_uniformis	PSPs	1	24	-0.005
DA557	Bacteroides_fragilis	PSPs	1	24	0.215
DA679	Bacteroides_caccae	PSPs	1	24	0.362
DA816	Bacteroides_stercoris	PSPs	1	24	0.305
DA904	Bacteroides_faecichinchillae	PSPs	1	24	-0.002
DA1209	Bacteroides_sartorii	PSPs	1	24	0.21
DA1247	Bacteroides_salyersiae	PSPs	1	24	0.395
DA1479	Bacteroides_intestinalis_A	PSPs	1	24	0.022
DA14	Bacteroides_xylanisolvens	PSPs	1	24	0.162
DA647	Bacteroides_clarus	PSPs	1	24	0.027
DA672	Parabacteroides_faecis	PSPs	1	24	0.011
DA21	Parabacteroides_merdae	PLPs	1	24	0.021
DA26	Bacteroides_dorei	PLPs	1	24	-0.014
DA57	Bacteroides_vulgatus	PLPs	1	24	-0.021
DA173	Bacteroides_bouchesdurhonensis	PLPs	1	24	0.046
DA320	Bacteroides_cellulosilyticus	PLPs	1	24	-0.043
DA347	Bacteroides_sp900066265	PLPs	1	24	0.042
DA486	Bacteroides_fragilis_A	PLPs	1	24	0.027
DA505	Bacteroides_ovatus	PLPs	1	24	-0.004
DA701	Parabacteroides_johnsonii	PLPs	1	24	-0.013
DA729	Parabacteroides_goldsteinii	PLPs	1	24	0.139
DA1114	Bacteroides_eggerthii	PLPs	1	24	0.123
DA1414	Bacteroides_faecis	PLPs	1	24	0.161
DA1439	Bacteroides_sp003545565	PLPs	1	24	-0.009
DA1461	Bacteroides_oleiciplenus	PLPs	1	24	0.042
DA104	Parabacteroides_distasonis	PLPs	1	24	-0.011
DA16	Bacteroides_thetaiotaomicron	PLPs	1	24	-0.003
DA103	Bacteroides_massiliensis	PLPs	1	24	0
DA183	Bacteroides_uniformis	PLPs	1	24	-0.008
DA557	Bacteroides_fragilis	PLPs	1	24	-0.012
DA679	Bacteroides_caccae	PLPs	1	24	0.052
DA816	Bacteroides_stercoris	PLPs	1	24	0.052
DA904	Bacteroides_faecichinchillae	PLPs	1	24	-0.031
DA1209	Bacteroides_sartorii	PLPs	1	24	-0.037
DA1247	Bacteroides_salyersiae	PLPs	1	24	0.143
DA1479	Bacteroides_intestinalis_A	PLPs	1	24	0.084
DA14	Bacteroides_xylanisolvens	PLPs	1	24	-0.01
DA647	Bacteroides_clarus	PLPs	1	24	0.011
DA672	Parabacteroides_faecis	PLPs	1	24	-0.024
DA21	Parabacteroides_merdae	AnPs	1	24	-0.003
DA26	Bacteroides_dorei	AnPs	1	24	0.203
DA57	Bacteroides_vulgatus	AnPs	1	24	0.196
DA173	Bacteroides_bouchesdurhonensis	AnPs	1	24	0.011
DA320	Bacteroides_cellulosilyticus	AnPs	1	24	0
DA347	Bacteroides_sp900066265	AnPs	1	24	0.317
DA486	Bacteroides_fragilis_A	AnPs	1	24	0.219
DA505	Bacteroides_ovatus	AnPs	1	24	0.303
DA701	Parabacteroides_johnsonii	AnPs	1	24	-0.002
DA729	Parabacteroides_goldsteinii	AnPs	1	24	0
DA1114	Bacteroides_eggerthii	AnPs	1	24	0.091
DA1414	Bacteroides_faecis	AnPs	1	24	0.257
DA1439	Bacteroides_sp003545565	AnPs	1	24	0.288
DA1461	Bacteroides_oleiciplenus	AnPs	1	24	0.227
DA104	Parabacteroides_distasonis	AnPs	1	24	0.177
DA16	Bacteroides_thetaiotaomicron	AnPs	1	24	0.164
DA103	Bacteroides_massiliensis	AnPs	1	24	0.035
DA183	Bacteroides_uniformis	AnPs	1	24	-0.004
DA557	Bacteroides_fragilis	AnPs	1	24	0.273
DA679	Bacteroides_caccae	AnPs	1	24	0.217
DA816	Bacteroides_stercoris	AnPs	1	24	0.307
DA904	Bacteroides_faecichinchillae	AnPs	1	24	-0.005
DA1209	Bacteroides_sartorii	AnPs	1	24	0.211
DA1247	Bacteroides_salyersiae	AnPs	1	24	0.25
DA1479	Bacteroides_intestinalis_A	AnPs	1	24	0.262
DA14	Bacteroides_xylanisolvens	AnPs	1	24	0.343
DA647	Bacteroides_clarus	AnPs	1	24	0.168
DA672	Parabacteroides_faecis	AnPs	1	24	0.301
DA21	Parabacteroides_merdae	PPs	1	24	-0.006
DA26	Bacteroides_dorei	PPs	1	24	-0.006
DA57	Bacteroides_vulgatus	PPs	1	24	-0.001
DA173	Bacteroides_bouchesdurhonensis	PPs	1	24	-0.009
DA320	Bacteroides_cellulosilyticus	PPs	1	24	0.008
DA347	Bacteroides_sp900066265	PPs	1	24	0.003
DA486	Bacteroides_fragilis_A	PPs	1	24	0.002
DA505	Bacteroides_ovatus	PPs	1	24	-0.007
DA701	Parabacteroides_johnsonii	PPs	1	24	0.183
DA729	Parabacteroides_goldsteinii	PPs	1	24	0.058
DA1114	Bacteroides_eggerthii	PPs	1	24	0.043
DA1414	Bacteroides_faecis	PPs	1	24	0.159
DA1439	Bacteroides_sp003545565	PPs	1	24	0.048
DA1461	Bacteroides_oleiciplenus	PPs	1	24	0.22
DA104	Parabacteroides_distasonis	PPs	1	24	0.125
DA16	Bacteroides_thetaiotaomicron	PPs	1	24	0.143
DA103	Bacteroides_massiliensis	PPs	1	24	0.002
DA183	Bacteroides_uniformis	PPs	1	24	0.015
DA557	Bacteroides_fragilis	PPs	1	24	0.008
DA679	Bacteroides_caccae	PPs	1	24	0.004
DA816	Bacteroides_stercoris	PPs	1	24	-0.002
DA904	Bacteroides_faecichinchillae	PPs	1	24	0.009
DA1209	Bacteroides_sartorii	PPs	1	24	0.091
DA1247	Bacteroides_salyersiae	PPs	1	24	-0.004
DA1479	Bacteroides_intestinalis_A	PPs	1	24	0.11
DA14	Bacteroides_xylanisolvens	PPs	1	24	0.171
DA647	Bacteroides_clarus	PPs	1	24	0.147
DA672	Parabacteroides_faecis	PPs	1	24	0.008
DA21	Parabacteroides_merdae	HAPs	1	24	-0.009
DA26	Bacteroides_dorei	HAPs	1	24	0.025
DA57	Bacteroides_vulgatus	HAPs	1	24	0.036
DA173	Bacteroides_bouchesdurhonensis	HAPs	1	24	-0.006
DA320	Bacteroides_cellulosilyticus	HAPs	1	24	-0.002
DA347	Bacteroides_sp900066265	HAPs	1	24	0.062
DA486	Bacteroides_fragilis_A	HAPs	1	24	-0.007
DA505	Bacteroides_ovatus	HAPs	1	24	0.052
DA701	Parabacteroides_johnsonii	HAPs	1	24	0.007
DA729	Parabacteroides_goldsteinii	HAPs	1	24	0.023
DA1114	Bacteroides_eggerthii	HAPs	1	24	0.059
DA1414	Bacteroides_faecis	HAPs	1	24	0.052
DA1439	Bacteroides_sp003545565	HAPs	1	24	0.063
DA1461	Bacteroides_oleiciplenus	HAPs	1	24	0.064
DA104	Parabacteroides_distasonis	HAPs	1	24	0.05
DA16	Bacteroides_thetaiotaomicron	HAPs	1	24	0.01
DA103	Bacteroides_massiliensis	HAPs	1	24	0.011
DA183	Bacteroides_uniformis	HAPs	1	24	0.003
DA557	Bacteroides_fragilis	HAPs	1	24	0.017
DA679	Bacteroides_caccae	HAPs	1	24	-0.008
DA816	Bacteroides_stercoris	HAPs	1	24	0.006
DA904	Bacteroides_faecichinchillae	HAPs	1	24	0.003
DA1209	Bacteroides_sartorii	HAPs	1	24	-0.008
DA1247	Bacteroides_salyersiae	HAPs	1	24	-0.005
DA1479	Bacteroides_intestinalis_A	HAPs	1	24	0.091
DA14	Bacteroides_xylanisolvens	HAPs	1	24	0.066
DA647	Bacteroides_clarus	HAPs	1	24	-0.003
DA672	Parabacteroides_faecis	HAPs	1	24	-0.011
DA21	Parabacteroides_merdae	GPs_mix	1	24	0.011
DA26	Bacteroides_dorei	GPs_mix	1	24	0.126
DA57	Bacteroides_vulgatus	GPs_mix	1	24	-0.003
DA173	Bacteroides_bouchesdurhonensis	GPs_mix	1	24	0.005
DA320	Bacteroides_cellulosilyticus	GPs_mix	1	24	0.004
DA347	Bacteroides_sp900066265	GPs_mix	1	24	0.115
DA486	Bacteroides_fragilis_A	GPs_mix	1	24	0.009
DA505	Bacteroides_ovatus	GPs_mix	1	24	0.203
DA701	Parabacteroides_johnsonii	GPs_mix	1	24	0.018
DA729	Parabacteroides_goldsteinii	GPs_mix	1	24	0.003
DA1114	Bacteroides_eggerthii	GPs_mix	1	24	0.362
DA1414	Bacteroides_faecis	GPs_mix	1	24	0.139
DA1439	Bacteroides_sp003545565	GPs_mix	1	24	0.326
DA1461	Bacteroides_oleiciplenus	GPs_mix	1	24	0.065
DA104	Parabacteroides_distasonis	GPs_mix	1	24	-0.001
DA16	Bacteroides_thetaiotaomicron	GPs_mix	1	24	0.227
DA103	Bacteroides_massiliensis	GPs_mix	1	24	0.011
DA183	Bacteroides_uniformis	GPs_mix	1	24	0.097
DA557	Bacteroides_fragilis	GPs_mix	1	24	0.091
DA679	Bacteroides_caccae	GPs_mix	1	24	0.001
DA816	Bacteroides_stercoris	GPs_mix	1	24	0.109
DA904	Bacteroides_faecichinchillae	GPs_mix	1	24	0.009
DA1209	Bacteroides_sartorii	GPs_mix	1	24	0.008
DA1247	Bacteroides_salyersiae	GPs_mix	1	24	0.141
DA1479	Bacteroides_intestinalis_A	GPs_mix	1	24	0.166
DA14	Bacteroides_xylanisolvens	GPs_mix	1	24	0.062
DA647	Bacteroides_clarus	GPs_mix	1	24	-0.004
DA672	Parabacteroides_faecis	GPs_mix	1	24	-0.002
DA21	Parabacteroides_merdae	GPs_S	1	24	-0.002
DA26	Bacteroides_dorei	GPs_S	1	24	0.456
DA57	Bacteroides_vulgatus	GPs_S	1	24	0.203
DA173	Bacteroides_bouchesdurhonensis	GPs_S	1	24	0.012
DA320	Bacteroides_cellulosilyticus	GPs_S	1	24	-0.001
DA347	Bacteroides_sp900066265	GPs_S	1	24	0.252
DA486	Bacteroides_fragilis_A	GPs_S	1	24	0.116
DA505	Bacteroides_ovatus	GPs_S	1	24	0.436
DA701	Parabacteroides_johnsonii	GPs_S	1	24	0.004
DA729	Parabacteroides_goldsteinii	GPs_S	1	24	0.104
DA1114	Bacteroides_eggerthii	GPs_S	1	24	0.096
DA1414	Bacteroides_faecis	GPs_S	1	24	0.418
DA1439	Bacteroides_sp003545565	GPs_S	1	24	0.374
DA1461	Bacteroides_oleiciplenus	GPs_S	1	24	0.023
DA104	Parabacteroides_distasonis	GPs_S	1	24	0.136
DA16	Bacteroides_thetaiotaomicron	GPs_S	1	24	0.379
DA103	Bacteroides_massiliensis	GPs_S	1	24	0
DA183	Bacteroides_uniformis	GPs_S	1	24	0.254
DA557	Bacteroides_fragilis	GPs_S	1	24	0.225
DA679	Bacteroides_caccae	GPs_S	1	24	0.044
DA816	Bacteroides_stercoris	GPs_S	1	24	0.21
DA904	Bacteroides_faecichinchillae	GPs_S	1	24	-0.25
DA1209	Bacteroides_sartorii	GPs_S	1	24	0.087
DA1247	Bacteroides_salyersiae	GPs_S	1	24	0.001
DA1479	Bacteroides_intestinalis_A	GPs_S	1	24	0.127
DA14	Bacteroides_xylanisolvens	GPs_S	1	24	0.223
DA647	Bacteroides_clarus	GPs_S	1	24	0.103
DA672	Parabacteroides_faecis	GPs_S	1	24	0.068
DA21	Parabacteroides_merdae	GPs_L	1	24	0.062
DA26	Bacteroides_dorei	GPs_L	1	24	0.744
DA57	Bacteroides_vulgatus	GPs_L	1	24	0.81
DA173	Bacteroides_bouchesdurhonensis	GPs_L	1	24	0.054
DA320	Bacteroides_cellulosilyticus	GPs_L	1	24	0.032
DA347	Bacteroides_sp900066265	GPs_L	1	24	0.409
DA486	Bacteroides_fragilis_A	GPs_L	1	24	0.041
DA505	Bacteroides_ovatus	GPs_L	1	24	0.363
DA701	Parabacteroides_johnsonii	GPs_L	1	24	0.007
DA729	Parabacteroides_goldsteinii	GPs_L	1	24	0.139
DA1114	Bacteroides_eggerthii	GPs_L	1	24	0.721
DA1414	Bacteroides_faecis	GPs_L	1	24	0.321
DA1439	Bacteroides_sp003545565	GPs_L	1	24	0.454
DA1461	Bacteroides_oleiciplenus	GPs_L	1	24	0.248
DA104	Parabacteroides_distasonis	GPs_L	1	24	0.153
DA16	Bacteroides_thetaiotaomicron	GPs_L	1	24	0.287
DA103	Bacteroides_massiliensis	GPs_L	1	24	0.006
DA183	Bacteroides_uniformis	GPs_L	1	24	0.43
DA557	Bacteroides_fragilis	GPs_L	1	24	0.608
DA679	Bacteroides_caccae	GPs_L	1	24	0.042
DA816	Bacteroides_stercoris	GPs_L	1	24	0.16
DA904	Bacteroides_faecichinchillae	GPs_L	1	24	0.012
DA1209	Bacteroides_sartorii	GPs_L	1	24	0.101
DA1247	Bacteroides_salyersiae	GPs_L	1	24	0.516
DA1479	Bacteroides_intestinalis_A	GPs_L	1	24	0.017
DA14	Bacteroides_xylanisolvens	GPs_L	1	24	0.217
DA647	Bacteroides_clarus	GPs_L	1	24	0.111
DA672	Parabacteroides_faecis	GPs_L	1	24	0.05
DA21	Parabacteroides_merdae	NC	1	36	0.006
DA26	Bacteroides_dorei	NC	1	36	0.005
DA57	Bacteroides_vulgatus	NC	1	36	0.007
DA173	Bacteroides_bouchesdurhonensis	NC	1	36	0.007
DA320	Bacteroides_cellulosilyticus	NC	1	36	0
DA347	Bacteroides_sp900066265	NC	1	36	0.003
DA486	Bacteroides_fragilis_A	NC	1	36	0
DA505	Bacteroides_ovatus	NC	1	36	0.006
DA701	Parabacteroides_johnsonii	NC	1	36	0.007
DA729	Parabacteroides_goldsteinii	NC	1	36	0.007
DA1114	Bacteroides_eggerthii	NC	1	36	0.002
DA1414	Bacteroides_faecis	NC	1	36	0
DA1439	Bacteroides_sp003545565	NC	1	36	0.001
DA1461	Bacteroides_oleiciplenus	NC	1	36	0.004
DA104	Parabacteroides_distasonis	NC	1	36	0.005
DA16	Bacteroides_thetaiotaomicron	NC	1	36	-0.001
DA103	Bacteroides_massiliensis	NC	1	36	0.001
DA183	Bacteroides_uniformis	NC	1	36	0
DA557	Bacteroides_fragilis	NC	1	36	0
DA679	Bacteroides_caccae	NC	1	36	0.004
DA816	Bacteroides_stercoris	NC	1	36	0.004
DA904	Bacteroides_faecichinchillae	NC	1	36	0.015
DA1209	Bacteroides_sartorii	NC	1	36	0.005
DA1247	Bacteroides_salyersiae	NC	1	36	0.003
DA1479	Bacteroides_intestinalis_A	NC	1	36	0.011
DA14	Bacteroides_xylanisolvens	NC	1	36	0.006
DA647	Bacteroides_clarus	NC	1	36	0
DA672	Parabacteroides_faecis	NC	1	36	0.002
DA21	Parabacteroides_merdae	RNPs	1	36	-0.002
DA26	Bacteroides_dorei	RNPs	1	36	0.322
DA57	Bacteroides_vulgatus	RNPs	1	36	0.325
DA173	Bacteroides_bouchesdurhonensis	RNPs	1	36	0.107
DA320	Bacteroides_cellulosilyticus	RNPs	1	36	0.111
DA347	Bacteroides_sp900066265	RNPs	1	36	0.138
DA486	Bacteroides_fragilis_A	RNPs	1	36	0.058
DA505	Bacteroides_ovatus	RNPs	1	36	0.226
DA701	Parabacteroides_johnsonii	RNPs	1	36	0.012
DA729	Parabacteroides_goldsteinii	RNPs	1	36	0.036
DA1114	Bacteroides_eggerthii	RNPs	1	36	0.508
DA1414	Bacteroides_faecis	RNPs	1	36	0.449
DA1439	Bacteroides_sp003545565	RNPs	1	36	0.587
DA1461	Bacteroides_oleiciplenus	RNPs	1	36	0.441
DA104	Parabacteroides_distasonis	RNPs	1	36	0.049
DA16	Bacteroides_thetaiotaomicron	RNPs	1	36	0.095
DA103	Bacteroides_massiliensis	RNPs	1	36	-0.002
DA183	Bacteroides_uniformis	RNPs	1	36	0.248
DA557	Bacteroides_fragilis	RNPs	1	36	0.371
DA679	Bacteroides_caccae	RNPs	1	36	0.085
DA816	Bacteroides_stercoris	RNPs	1	36	0.278
DA904	Bacteroides_faecichinchillae	RNPs	1	36	-0.005
DA1209	Bacteroides_sartorii	RNPs	1	36	0.371
DA1247	Bacteroides_salyersiae	RNPs	1	36	0.332
DA1479	Bacteroides_intestinalis_A	RNPs	1	36	0.011
DA14	Bacteroides_xylanisolvens	RNPs	1	36	0.139
DA647	Bacteroides_clarus	RNPs	1	36	0.037
DA672	Parabacteroides_faecis	RNPs	1	36	0.034
DA21	Parabacteroides_merdae	PQPs	1	36	-0.003
DA26	Bacteroides_dorei	PQPs	1	36	0.316
DA57	Bacteroides_vulgatus	PQPs	1	36	0.245
DA173	Bacteroides_bouchesdurhonensis	PQPs	1	36	0.042
DA320	Bacteroides_cellulosilyticus	PQPs	1	36	0.055
DA347	Bacteroides_sp900066265	PQPs	1	36	0.331
DA486	Bacteroides_fragilis_A	PQPs	1	36	0.098
DA505	Bacteroides_ovatus	PQPs	1	36	0.356
DA701	Parabacteroides_johnsonii	PQPs	1	36	0.007
DA729	Parabacteroides_goldsteinii	PQPs	1	36	0.007
DA1114	Bacteroides_eggerthii	PQPs	1	36	0.045
DA1414	Bacteroides_faecis	PQPs	1	36	0.405
DA1439	Bacteroides_sp003545565	PQPs	1	36	0.359
DA1461	Bacteroides_oleiciplenus	PQPs	1	36	0.289
DA104	Parabacteroides_distasonis	PQPs	1	36	-0.019
DA16	Bacteroides_thetaiotaomicron	PQPs	1	36	0.399
DA103	Bacteroides_massiliensis	PQPs	1	36	0.031
DA183	Bacteroides_uniformis	PQPs	1	36	0.009
DA557	Bacteroides_fragilis	PQPs	1	36	0.251
DA679	Bacteroides_caccae	PQPs	1	36	0.264
DA816	Bacteroides_stercoris	PQPs	1	36	0.281
DA904	Bacteroides_faecichinchillae	PQPs	1	36	0.056
DA1209	Bacteroides_sartorii	PQPs	1	36	0.246
DA1247	Bacteroides_salyersiae	PQPs	1	36	0.409
DA1479	Bacteroides_intestinalis_A	PQPs	1	36	0.136
DA14	Bacteroides_xylanisolvens	PQPs	1	36	0.152
DA647	Bacteroides_clarus	PQPs	1	36	0.1
DA672	Parabacteroides_faecis	PQPs	1	36	0.003
DA21	Parabacteroides_merdae	RPPs	1	36	0.002
DA26	Bacteroides_dorei	RPPs	1	36	0.159
DA57	Bacteroides_vulgatus	RPPs	1	36	0.164
DA173	Bacteroides_bouchesdurhonensis	RPPs	1	36	0.023
DA320	Bacteroides_cellulosilyticus	RPPs	1	36	0.032
DA347	Bacteroides_sp900066265	RPPs	1	36	0.185
DA486	Bacteroides_fragilis_A	RPPs	1	36	0.043
DA505	Bacteroides_ovatus	RPPs	1	36	0.212
DA701	Parabacteroides_johnsonii	RPPs	1	36	0.004
DA729	Parabacteroides_goldsteinii	RPPs	1	36	0.017
DA1114	Bacteroides_eggerthii	RPPs	1	36	0.002
DA1414	Bacteroides_faecis	RPPs	1	36	0.031
DA1439	Bacteroides_sp003545565	RPPs	1	36	0.271
DA1461	Bacteroides_oleiciplenus	RPPs	1	36	0.244
DA104	Parabacteroides_distasonis	RPPs	1	36	0
DA16	Bacteroides_thetaiotaomicron	RPPs	1	36	0.023
DA103	Bacteroides_massiliensis	RPPs	1	36	-0.007
DA183	Bacteroides_uniformis	RPPs	1	36	0.051
DA557	Bacteroides_fragilis	RPPs	1	36	0.121
DA679	Bacteroides_caccae	RPPs	1	36	0.145
DA816	Bacteroides_stercoris	RPPs	1	36	0.12
DA904	Bacteroides_faecichinchillae	RPPs	1	36	0.106
DA1209	Bacteroides_sartorii	RPPs	1	36	0.159
DA1247	Bacteroides_salyersiae	RPPs	1	36	0.057
DA1479	Bacteroides_intestinalis_A	RPPs	1	36	0.05
DA14	Bacteroides_xylanisolvens	RPPs	1	36	0.267
DA647	Bacteroides_clarus	RPPs	1	36	0.049
DA672	Parabacteroides_faecis	RPPs	1	36	0.05
DA21	Parabacteroides_merdae	CPPs	1	36	0.002
DA26	Bacteroides_dorei	CPPs	1	36	0.149
DA57	Bacteroides_vulgatus	CPPs	1	36	0.212
DA173	Bacteroides_bouchesdurhonensis	CPPs	1	36	0.052
DA320	Bacteroides_cellulosilyticus	CPPs	1	36	0.039
DA347	Bacteroides_sp900066265	CPPs	1	36	0.176
DA486	Bacteroides_fragilis_A	CPPs	1	36	0.427
DA505	Bacteroides_ovatus	CPPs	1	36	0.496
DA701	Parabacteroides_johnsonii	CPPs	1	36	0.003
DA729	Parabacteroides_goldsteinii	CPPs	1	36	0.095
DA1114	Bacteroides_eggerthii	CPPs	1	36	-0.003
DA1414	Bacteroides_faecis	CPPs	1	36	0.542
DA1439	Bacteroides_sp003545565	CPPs	1	36	0.096
DA1461	Bacteroides_oleiciplenus	CPPs	1	36	0.056
DA104	Parabacteroides_distasonis	CPPs	1	36	0.049
DA16	Bacteroides_thetaiotaomicron	CPPs	1	36	0.062
DA103	Bacteroides_massiliensis	CPPs	1	36	0.022
DA183	Bacteroides_uniformis	CPPs	1	36	0.055
DA557	Bacteroides_fragilis	CPPs	1	36	0.391
DA679	Bacteroides_caccae	CPPs	1	36	0.331
DA816	Bacteroides_stercoris	CPPs	1	36	0.3
DA904	Bacteroides_faecichinchillae	CPPs	1	36	0.029
DA1209	Bacteroides_sartorii	CPPs	1	36	0.672
DA1247	Bacteroides_salyersiae	CPPs	1	36	0.431
DA1479	Bacteroides_intestinalis_A	CPPs	1	36	0.043
DA14	Bacteroides_xylanisolvens	CPPs	1	36	0.047
DA647	Bacteroides_clarus	CPPs	1	36	0.049
DA672	Parabacteroides_faecis	CPPs	1	36	0
DA21	Parabacteroides_merdae	AdPs	1	36	0.051
DA26	Bacteroides_dorei	AdPs	1	36	0.343
DA57	Bacteroides_vulgatus	AdPs	1	36	0.324
DA173	Bacteroides_bouchesdurhonensis	AdPs	1	36	0.054
DA320	Bacteroides_cellulosilyticus	AdPs	1	36	0.051
DA347	Bacteroides_sp900066265	AdPs	1	36	0.353
DA486	Bacteroides_fragilis_A	AdPs	1	36	0.052
DA505	Bacteroides_ovatus	AdPs	1	36	0.427
DA701	Parabacteroides_johnsonii	AdPs	1	36	0.007
DA729	Parabacteroides_goldsteinii	AdPs	1	36	0.012
DA1114	Bacteroides_eggerthii	AdPs	1	36	0.546
DA1414	Bacteroides_faecis	AdPs	1	36	0.443
DA1439	Bacteroides_sp003545565	AdPs	1	36	0.615
DA1461	Bacteroides_oleiciplenus	AdPs	1	36	0.081
DA104	Parabacteroides_distasonis	AdPs	1	36	0.065
DA16	Bacteroides_thetaiotaomicron	AdPs	1	36	0.388
DA103	Bacteroides_massiliensis	AdPs	1	36	0.042
DA183	Bacteroides_uniformis	AdPs	1	36	0.03
DA557	Bacteroides_fragilis	AdPs	1	36	0.673
DA679	Bacteroides_caccae	AdPs	1	36	0.16
DA816	Bacteroides_stercoris	AdPs	1	36	0.544
DA904	Bacteroides_faecichinchillae	AdPs	1	36	-0.003
DA1209	Bacteroides_sartorii	AdPs	1	36	0.414
DA1247	Bacteroides_salyersiae	AdPs	1	36	0.651
DA1479	Bacteroides_intestinalis_A	AdPs	1	36	0.282
DA14	Bacteroides_xylanisolvens	AdPs	1	36	0.417
DA647	Bacteroides_clarus	AdPs	1	36	0.053
DA672	Parabacteroides_faecis	AdPs	1	36	0.061
DA21	Parabacteroides_merdae	SPs	1	36	-0.005
DA26	Bacteroides_dorei	SPs	1	36	0.474
DA57	Bacteroides_vulgatus	SPs	1	36	0.358
DA173	Bacteroides_bouchesdurhonensis	SPs	1	36	0.225
DA320	Bacteroides_cellulosilyticus	SPs	1	36	0.145
DA347	Bacteroides_sp900066265	SPs	1	36	0.097
DA486	Bacteroides_fragilis_A	SPs	1	36	0.409
DA505	Bacteroides_ovatus	SPs	1	36	0.477
DA701	Parabacteroides_johnsonii	SPs	1	36	0.019
DA729	Parabacteroides_goldsteinii	SPs	1	36	0.018
DA1114	Bacteroides_eggerthii	SPs	1	36	0.016
DA1414	Bacteroides_faecis	SPs	1	36	0.007
DA1439	Bacteroides_sp003545565	SPs	1	36	0.586
DA1461	Bacteroides_oleiciplenus	SPs	1	36	0.489
DA104	Parabacteroides_distasonis	SPs	1	36	0.318
DA16	Bacteroides_thetaiotaomicron	SPs	1	36	0.018
DA103	Bacteroides_massiliensis	SPs	1	36	0.014
DA183	Bacteroides_uniformis	SPs	1	36	0.002
DA557	Bacteroides_fragilis	SPs	1	36	0.56
DA679	Bacteroides_caccae	SPs	1	36	-0.001
DA816	Bacteroides_stercoris	SPs	1	36	0.007
DA904	Bacteroides_faecichinchillae	SPs	1	36	-0.001
DA1209	Bacteroides_sartorii	SPs	1	36	0.014
DA1247	Bacteroides_salyersiae	SPs	1	36	-0.004
DA1479	Bacteroides_intestinalis_A	SPs	1	36	0.455
DA14	Bacteroides_xylanisolvens	SPs	1	36	0.559
DA647	Bacteroides_clarus	SPs	1	36	0.011
DA672	Parabacteroides_faecis	SPs	1	36	-0.006
DA21	Parabacteroides_merdae	RAPs	1	36	0.011
DA26	Bacteroides_dorei	RAPs	1	36	0.007
DA57	Bacteroides_vulgatus	RAPs	1	36	-0.004
DA173	Bacteroides_bouchesdurhonensis	RAPs	1	36	-0.003
DA320	Bacteroides_cellulosilyticus	RAPs	1	36	0.009
DA347	Bacteroides_sp900066265	RAPs	1	36	0.369
DA486	Bacteroides_fragilis_A	RAPs	1	36	0.334
DA505	Bacteroides_ovatus	RAPs	1	36	0.381
DA701	Parabacteroides_johnsonii	RAPs	1	36	0.078
DA729	Parabacteroides_goldsteinii	RAPs	1	36	0.287
DA1114	Bacteroides_eggerthii	RAPs	1	36	0.047
DA1414	Bacteroides_faecis	RAPs	1	36	0.394
DA1439	Bacteroides_sp003545565	RAPs	1	36	0.254
DA1461	Bacteroides_oleiciplenus	RAPs	1	36	0.383
DA104	Parabacteroides_distasonis	RAPs	1	36	0.095
DA16	Bacteroides_thetaiotaomicron	RAPs	1	36	0.306
DA103	Bacteroides_massiliensis	RAPs	1	36	0.017
DA183	Bacteroides_uniformis	RAPs	1	36	0.017
DA557	Bacteroides_fragilis	RAPs	1	36	0.42
DA679	Bacteroides_caccae	RAPs	1	36	0.279
DA816	Bacteroides_stercoris	RAPs	1	36	0.406
DA904	Bacteroides_faecichinchillae	RAPs	1	36	-0.003
DA1209	Bacteroides_sartorii	RAPs	1	36	0.481
DA1247	Bacteroides_salyersiae	RAPs	1	36	0.514
DA1479	Bacteroides_intestinalis_A	RAPs	1	36	0.004
DA14	Bacteroides_xylanisolvens	RAPs	1	36	0.012
DA647	Bacteroides_clarus	RAPs	1	36	-0.002
DA672	Parabacteroides_faecis	RAPs	1	36	0.001
DA21	Parabacteroides_merdae	PSPs	1	36	0.005
DA26	Bacteroides_dorei	PSPs	1	36	0.029
DA57	Bacteroides_vulgatus	PSPs	1	36	0.066
DA173	Bacteroides_bouchesdurhonensis	PSPs	1	36	0.033
DA320	Bacteroides_cellulosilyticus	PSPs	1	36	0.049
DA347	Bacteroides_sp900066265	PSPs	1	36	0.457
DA486	Bacteroides_fragilis_A	PSPs	1	36	0.144
DA505	Bacteroides_ovatus	PSPs	1	36	0.387
DA701	Parabacteroides_johnsonii	PSPs	1	36	-0.001
DA729	Parabacteroides_goldsteinii	PSPs	1	36	0.013
DA1114	Bacteroides_eggerthii	PSPs	1	36	0.027
DA1414	Bacteroides_faecis	PSPs	1	36	0.059
DA1439	Bacteroides_sp003545565	PSPs	1	36	0.049
DA1461	Bacteroides_oleiciplenus	PSPs	1	36	0.28
DA104	Parabacteroides_distasonis	PSPs	1	36	-0.003
DA16	Bacteroides_thetaiotaomicron	PSPs	1	36	0.095
DA103	Bacteroides_massiliensis	PSPs	1	36	0.002
DA183	Bacteroides_uniformis	PSPs	1	36	-0.015
DA557	Bacteroides_fragilis	PSPs	1	36	0.375
DA679	Bacteroides_caccae	PSPs	1	36	0.29
DA816	Bacteroides_stercoris	PSPs	1	36	0.417
DA904	Bacteroides_faecichinchillae	PSPs	1	36	0.008
DA1209	Bacteroides_sartorii	PSPs	1	36	0.283
DA1247	Bacteroides_salyersiae	PSPs	1	36	0.444
DA1479	Bacteroides_intestinalis_A	PSPs	1	36	0.025
DA14	Bacteroides_xylanisolvens	PSPs	1	36	0.115
DA647	Bacteroides_clarus	PSPs	1	36	0.06
DA672	Parabacteroides_faecis	PSPs	1	36	0.029
DA21	Parabacteroides_merdae	PLPs	1	36	-0.006
DA26	Bacteroides_dorei	PLPs	1	36	0.002
DA57	Bacteroides_vulgatus	PLPs	1	36	0.004
DA173	Bacteroides_bouchesdurhonensis	PLPs	1	36	-0.009
DA320	Bacteroides_cellulosilyticus	PLPs	1	36	-0.009
DA347	Bacteroides_sp900066265	PLPs	1	36	-0.001
DA486	Bacteroides_fragilis_A	PLPs	1	36	0.059
DA505	Bacteroides_ovatus	PLPs	1	36	-0.023
DA701	Parabacteroides_johnsonii	PLPs	1	36	0.153
DA729	Parabacteroides_goldsteinii	PLPs	1	36	0.234
DA1114	Bacteroides_eggerthii	PLPs	1	36	0.202
DA1414	Bacteroides_faecis	PLPs	1	36	0.238
DA1439	Bacteroides_sp003545565	PLPs	1	36	0.135
DA1461	Bacteroides_oleiciplenus	PLPs	1	36	0.184
DA104	Parabacteroides_distasonis	PLPs	1	36	0.165
DA16	Bacteroides_thetaiotaomicron	PLPs	1	36	0.132
DA103	Bacteroides_massiliensis	PLPs	1	36	0.02
DA183	Bacteroides_uniformis	PLPs	1	36	0.008
DA557	Bacteroides_fragilis	PLPs	1	36	0.012
DA679	Bacteroides_caccae	PLPs	1	36	0
DA816	Bacteroides_stercoris	PLPs	1	36	0.071
DA904	Bacteroides_faecichinchillae	PLPs	1	36	0.003
DA1209	Bacteroides_sartorii	PLPs	1	36	0.064
DA1247	Bacteroides_salyersiae	PLPs	1	36	-0.01
DA1479	Bacteroides_intestinalis_A	PLPs	1	36	0.116
DA14	Bacteroides_xylanisolvens	PLPs	1	36	0
DA647	Bacteroides_clarus	PLPs	1	36	0.034
DA672	Parabacteroides_faecis	PLPs	1	36	0.01
DA21	Parabacteroides_merdae	AnPs	1	36	-0.003
DA26	Bacteroides_dorei	AnPs	1	36	0.151
DA57	Bacteroides_vulgatus	AnPs	1	36	0.131
DA173	Bacteroides_bouchesdurhonensis	AnPs	1	36	0.002
DA320	Bacteroides_cellulosilyticus	AnPs	1	36	0
DA347	Bacteroides_sp900066265	AnPs	1	36	0.272
DA486	Bacteroides_fragilis_A	AnPs	1	36	0.229
DA505	Bacteroides_ovatus	AnPs	1	36	0.296
DA701	Parabacteroides_johnsonii	AnPs	1	36	0.011
DA729	Parabacteroides_goldsteinii	AnPs	1	36	-0.002
DA1114	Bacteroides_eggerthii	AnPs	1	36	0.031
DA1414	Bacteroides_faecis	AnPs	1	36	0.3
DA1439	Bacteroides_sp003545565	AnPs	1	36	0.298
DA1461	Bacteroides_oleiciplenus	AnPs	1	36	0.268
DA104	Parabacteroides_distasonis	AnPs	1	36	0.095
DA16	Bacteroides_thetaiotaomicron	AnPs	1	36	0.167
DA103	Bacteroides_massiliensis	AnPs	1	36	0.008
DA183	Bacteroides_uniformis	AnPs	1	36	0.004
DA557	Bacteroides_fragilis	AnPs	1	36	0.176
DA679	Bacteroides_caccae	AnPs	1	36	0.301
DA816	Bacteroides_stercoris	AnPs	1	36	0.361
DA904	Bacteroides_faecichinchillae	AnPs	1	36	-0.005
DA1209	Bacteroides_sartorii	AnPs	1	36	0.191
DA1247	Bacteroides_salyersiae	AnPs	1	36	0.176
DA1479	Bacteroides_intestinalis_A	AnPs	1	36	0.174
DA14	Bacteroides_xylanisolvens	AnPs	1	36	0.296
DA647	Bacteroides_clarus	AnPs	1	36	0.214
DA672	Parabacteroides_faecis	AnPs	1	36	0.203
DA21	Parabacteroides_merdae	PPs	1	36	-0.004
DA26	Bacteroides_dorei	PPs	1	36	-0.006
DA57	Bacteroides_vulgatus	PPs	1	36	-0.006
DA173	Bacteroides_bouchesdurhonensis	PPs	1	36	0.005
DA320	Bacteroides_cellulosilyticus	PPs	1	36	0.004
DA347	Bacteroides_sp900066265	PPs	1	36	0
DA486	Bacteroides_fragilis_A	PPs	1	36	-0.003
DA505	Bacteroides_ovatus	PPs	1	36	0
DA701	Parabacteroides_johnsonii	PPs	1	36	0.126
DA729	Parabacteroides_goldsteinii	PPs	1	36	0.048
DA1114	Bacteroides_eggerthii	PPs	1	36	0.017
DA1414	Bacteroides_faecis	PPs	1	36	0.098
DA1439	Bacteroides_sp003545565	PPs	1	36	0.047
DA1461	Bacteroides_oleiciplenus	PPs	1	36	0.211
DA104	Parabacteroides_distasonis	PPs	1	36	0.144
DA16	Bacteroides_thetaiotaomicron	PPs	1	36	0.098
DA103	Bacteroides_massiliensis	PPs	1	36	0.01
DA183	Bacteroides_uniformis	PPs	1	36	0.005
DA557	Bacteroides_fragilis	PPs	1	36	0.004
DA679	Bacteroides_caccae	PPs	1	36	0.003
DA816	Bacteroides_stercoris	PPs	1	36	-0.003
DA904	Bacteroides_faecichinchillae	PPs	1	36	-0.007
DA1209	Bacteroides_sartorii	PPs	1	36	0.137
DA1247	Bacteroides_salyersiae	PPs	1	36	0.02
DA1479	Bacteroides_intestinalis_A	PPs	1	36	0.023
DA14	Bacteroides_xylanisolvens	PPs	1	36	0.14
DA647	Bacteroides_clarus	PPs	1	36	0.144
DA672	Parabacteroides_faecis	PPs	1	36	0.036
DA21	Parabacteroides_merdae	HAPs	1	36	-0.005
DA26	Bacteroides_dorei	HAPs	1	36	0.051
DA57	Bacteroides_vulgatus	HAPs	1	36	0.032
DA173	Bacteroides_bouchesdurhonensis	HAPs	1	36	-0.006
DA320	Bacteroides_cellulosilyticus	HAPs	1	36	-0.003
DA347	Bacteroides_sp900066265	HAPs	1	36	0.094
DA486	Bacteroides_fragilis_A	HAPs	1	36	0
DA505	Bacteroides_ovatus	HAPs	1	36	0.066
DA701	Parabacteroides_johnsonii	HAPs	1	36	0.003
DA729	Parabacteroides_goldsteinii	HAPs	1	36	0.009
DA1114	Bacteroides_eggerthii	HAPs	1	36	0.055
DA1414	Bacteroides_faecis	HAPs	1	36	0.07
DA1439	Bacteroides_sp003545565	HAPs	1	36	0.064
DA1461	Bacteroides_oleiciplenus	HAPs	1	36	0.067
DA104	Parabacteroides_distasonis	HAPs	1	36	0.043
DA16	Bacteroides_thetaiotaomicron	HAPs	1	36	0.051
DA103	Bacteroides_massiliensis	HAPs	1	36	0.005
DA183	Bacteroides_uniformis	HAPs	1	36	0
DA557	Bacteroides_fragilis	HAPs	1	36	0.001
DA679	Bacteroides_caccae	HAPs	1	36	-0.005
DA816	Bacteroides_stercoris	HAPs	1	36	0.026
DA904	Bacteroides_faecichinchillae	HAPs	1	36	-0.003
DA1209	Bacteroides_sartorii	HAPs	1	36	0.021
DA1247	Bacteroides_salyersiae	HAPs	1	36	0.015
DA1479	Bacteroides_intestinalis_A	HAPs	1	36	0.069
DA14	Bacteroides_xylanisolvens	HAPs	1	36	0.08
DA647	Bacteroides_clarus	HAPs	1	36	0
DA672	Parabacteroides_faecis	HAPs	1	36	-0.004
DA21	Parabacteroides_merdae	GPs_mix	1	36	-0.001
DA26	Bacteroides_dorei	GPs_mix	1	36	0.158
DA57	Bacteroides_vulgatus	GPs_mix	1	36	0.025
DA173	Bacteroides_bouchesdurhonensis	GPs_mix	1	36	-0.005
DA320	Bacteroides_cellulosilyticus	GPs_mix	1	36	-0.001
DA347	Bacteroides_sp900066265	GPs_mix	1	36	0.199
DA486	Bacteroides_fragilis_A	GPs_mix	1	36	0.012
DA505	Bacteroides_ovatus	GPs_mix	1	36	0.199
DA701	Parabacteroides_johnsonii	GPs_mix	1	36	0.009
DA729	Parabacteroides_goldsteinii	GPs_mix	1	36	0.026
DA1114	Bacteroides_eggerthii	GPs_mix	1	36	0.314
DA1414	Bacteroides_faecis	GPs_mix	1	36	0.262
DA1439	Bacteroides_sp003545565	GPs_mix	1	36	0.389
DA1461	Bacteroides_oleiciplenus	GPs_mix	1	36	0.236
DA104	Parabacteroides_distasonis	GPs_mix	1	36	-0.005
DA16	Bacteroides_thetaiotaomicron	GPs_mix	1	36	0.24
DA103	Bacteroides_massiliensis	GPs_mix	1	36	-0.006
DA183	Bacteroides_uniformis	GPs_mix	1	36	0.137
DA557	Bacteroides_fragilis	GPs_mix	1	36	0.193
DA679	Bacteroides_caccae	GPs_mix	1	36	-0.004
DA816	Bacteroides_stercoris	GPs_mix	1	36	0.094
DA904	Bacteroides_faecichinchillae	GPs_mix	1	36	-0.006
DA1209	Bacteroides_sartorii	GPs_mix	1	36	-0.001
DA1247	Bacteroides_salyersiae	GPs_mix	1	36	0.127
DA1479	Bacteroides_intestinalis_A	GPs_mix	1	36	0.112
DA14	Bacteroides_xylanisolvens	GPs_mix	1	36	0.253
DA647	Bacteroides_clarus	GPs_mix	1	36	-0.002
DA672	Parabacteroides_faecis	GPs_mix	1	36	-0.003
DA21	Parabacteroides_merdae	GPs_S	1	36	-0.004
DA26	Bacteroides_dorei	GPs_S	1	36	0.729
DA57	Bacteroides_vulgatus	GPs_S	1	36	0.73
DA173	Bacteroides_bouchesdurhonensis	GPs_S	1	36	0.021
DA320	Bacteroides_cellulosilyticus	GPs_S	1	36	0.002
DA347	Bacteroides_sp900066265	GPs_S	1	36	0.454
DA486	Bacteroides_fragilis_A	GPs_S	1	36	0.118
DA505	Bacteroides_ovatus	GPs_S	1	36	0.455
DA701	Parabacteroides_johnsonii	GPs_S	1	36	0
DA729	Parabacteroides_goldsteinii	GPs_S	1	36	0.129
DA1114	Bacteroides_eggerthii	GPs_S	1	36	0.169
DA1414	Bacteroides_faecis	GPs_S	1	36	0.44
DA1439	Bacteroides_sp003545565	GPs_S	1	36	0.451
DA1461	Bacteroides_oleiciplenus	GPs_S	1	36	0.231
DA104	Parabacteroides_distasonis	GPs_S	1	36	0.096
DA16	Bacteroides_thetaiotaomicron	GPs_S	1	36	0.43
DA103	Bacteroides_massiliensis	GPs_S	1	36	0.003
DA183	Bacteroides_uniformis	GPs_S	1	36	0.107
DA557	Bacteroides_fragilis	GPs_S	1	36	0.35
DA679	Bacteroides_caccae	GPs_S	1	36	0.033
DA816	Bacteroides_stercoris	GPs_S	1	36	0.227
DA904	Bacteroides_faecichinchillae	GPs_S	1	36	-0.004
DA1209	Bacteroides_sartorii	GPs_S	1	36	0.078
DA1247	Bacteroides_salyersiae	GPs_S	1	36	-0.004
DA1479	Bacteroides_intestinalis_A	GPs_S	1	36	0.255
DA14	Bacteroides_xylanisolvens	GPs_S	1	36	0.43
DA647	Bacteroides_clarus	GPs_S	1	36	0.135
DA672	Parabacteroides_faecis	GPs_S	1	36	0.088
DA21	Parabacteroides_merdae	GPs_L	1	36	0.025
DA26	Bacteroides_dorei	GPs_L	1	36	0.865
DA57	Bacteroides_vulgatus	GPs_L	1	36	0.489
DA173	Bacteroides_bouchesdurhonensis	GPs_L	1	36	0.081
DA320	Bacteroides_cellulosilyticus	GPs_L	1	36	0.084
DA347	Bacteroides_sp900066265	GPs_L	1	36	0.487
DA486	Bacteroides_fragilis_A	GPs_L	1	36	0.051
DA505	Bacteroides_ovatus	GPs_L	1	36	0.366
DA701	Parabacteroides_johnsonii	GPs_L	1	36	0.012
DA729	Parabacteroides_goldsteinii	GPs_L	1	36	0.176
DA1114	Bacteroides_eggerthii	GPs_L	1	36	0.612
DA1414	Bacteroides_faecis	GPs_L	1	36	0.661
DA1439	Bacteroides_sp003545565	GPs_L	1	36	0.656
DA1461	Bacteroides_oleiciplenus	GPs_L	1	36	0.452
DA104	Parabacteroides_distasonis	GPs_L	1	36	0.135
DA16	Bacteroides_thetaiotaomicron	GPs_L	1	36	0.348
DA103	Bacteroides_massiliensis	GPs_L	1	36	0
DA183	Bacteroides_uniformis	GPs_L	1	36	0.438
DA557	Bacteroides_fragilis	GPs_L	1	36	0.506
DA679	Bacteroides_caccae	GPs_L	1	36	0.055
DA816	Bacteroides_stercoris	GPs_L	1	36	0.306
DA904	Bacteroides_faecichinchillae	GPs_L	1	36	0.001
DA1209	Bacteroides_sartorii	GPs_L	1	36	0.146
DA1247	Bacteroides_salyersiae	GPs_L	1	36	0.523
DA1479	Bacteroides_intestinalis_A	GPs_L	1	36	0.049
DA14	Bacteroides_xylanisolvens	GPs_L	1	36	0.336
DA647	Bacteroides_clarus	GPs_L	1	36	0.173
DA672	Parabacteroides_faecis	GPs_L	1	36	0.098
DA21	Parabacteroides_merdae	NC	1	48	0.001
DA26	Bacteroides_dorei	NC	1	48	0.006
DA57	Bacteroides_vulgatus	NC	1	48	0.003
DA173	Bacteroides_bouchesdurhonensis	NC	1	48	0.005
DA320	Bacteroides_cellulosilyticus	NC	1	48	0.002
DA347	Bacteroides_sp900066265	NC	1	48	0.008
DA486	Bacteroides_fragilis_A	NC	1	48	0.003
DA505	Bacteroides_ovatus	NC	1	48	0.001
DA701	Parabacteroides_johnsonii	NC	1	48	0.005
DA729	Parabacteroides_goldsteinii	NC	1	48	0.007
DA1114	Bacteroides_eggerthii	NC	1	48	0.002
DA1414	Bacteroides_faecis	NC	1	48	0.006
DA1439	Bacteroides_sp003545565	NC	1	48	0.008
DA1461	Bacteroides_oleiciplenus	NC	1	48	0.007
DA104	Parabacteroides_distasonis	NC	1	48	0.009
DA16	Bacteroides_thetaiotaomicron	NC	1	48	0.016
DA103	Bacteroides_massiliensis	NC	1	48	0.002
DA183	Bacteroides_uniformis	NC	1	48	0.008
DA557	Bacteroides_fragilis	NC	1	48	0.004
DA679	Bacteroides_caccae	NC	1	48	0.008
DA816	Bacteroides_stercoris	NC	1	48	0.003
DA904	Bacteroides_faecichinchillae	NC	1	48	0.005
DA1209	Bacteroides_sartorii	NC	1	48	0.006
DA1247	Bacteroides_salyersiae	NC	1	48	0.007
DA1479	Bacteroides_intestinalis_A	NC	1	48	0.007
DA14	Bacteroides_xylanisolvens	NC	1	48	0.008
DA647	Bacteroides_clarus	NC	1	48	0.004
DA672	Parabacteroides_faecis	NC	1	48	0.003
DA21	Parabacteroides_merdae	RNPs	1	48	0.044
DA26	Bacteroides_dorei	RNPs	1	48	0.355
DA57	Bacteroides_vulgatus	RNPs	1	48	0.387
DA173	Bacteroides_bouchesdurhonensis	RNPs	1	48	0.088
DA320	Bacteroides_cellulosilyticus	RNPs	1	48	0.098
DA347	Bacteroides_sp900066265	RNPs	1	48	0.178
DA486	Bacteroides_fragilis_A	RNPs	1	48	0.097
DA505	Bacteroides_ovatus	RNPs	1	48	0.261
DA701	Parabacteroides_johnsonii	RNPs	1	48	0.05
DA729	Parabacteroides_goldsteinii	RNPs	1	48	0.095
DA1114	Bacteroides_eggerthii	RNPs	1	48	0.348
DA1414	Bacteroides_faecis	RNPs	1	48	0.306
DA1439	Bacteroides_sp003545565	RNPs	1	48	0.418
DA1461	Bacteroides_oleiciplenus	RNPs	1	48	0.366
DA104	Parabacteroides_distasonis	RNPs	1	48	0.089
DA16	Bacteroides_thetaiotaomicron	RNPs	1	48	0.251
DA103	Bacteroides_massiliensis	RNPs	1	48	0.028
DA183	Bacteroides_uniformis	RNPs	1	48	0.377
DA557	Bacteroides_fragilis	RNPs	1	48	0.39
DA679	Bacteroides_caccae	RNPs	1	48	0.056
DA816	Bacteroides_stercoris	RNPs	1	48	0.374
DA904	Bacteroides_faecichinchillae	RNPs	1	48	0.041
DA1209	Bacteroides_sartorii	RNPs	1	48	0.362
DA1247	Bacteroides_salyersiae	RNPs	1	48	0.324
DA1479	Bacteroides_intestinalis_A	RNPs	1	48	0.011
DA14	Bacteroides_xylanisolvens	RNPs	1	48	0.17
DA647	Bacteroides_clarus	RNPs	1	48	0.07
DA672	Parabacteroides_faecis	RNPs	1	48	0.056
DA21	Parabacteroides_merdae	PQPs	1	48	-0.026
DA26	Bacteroides_dorei	PQPs	1	48	0.292
DA57	Bacteroides_vulgatus	PQPs	1	48	0.244
DA173	Bacteroides_bouchesdurhonensis	PQPs	1	48	0.027
DA320	Bacteroides_cellulosilyticus	PQPs	1	48	0.076
DA347	Bacteroides_sp900066265	PQPs	1	48	0.364
DA486	Bacteroides_fragilis_A	PQPs	1	48	0.084
DA505	Bacteroides_ovatus	PQPs	1	48	0.3
DA701	Parabacteroides_johnsonii	PQPs	1	48	-0.023
DA729	Parabacteroides_goldsteinii	PQPs	1	48	-0.023
DA1114	Bacteroides_eggerthii	PQPs	1	48	-0.012
DA1414	Bacteroides_faecis	PQPs	1	48	0.285
DA1439	Bacteroides_sp003545565	PQPs	1	48	0.222
DA1461	Bacteroides_oleiciplenus	PQPs	1	48	0.234
DA104	Parabacteroides_distasonis	PQPs	1	48	-0.008
DA16	Bacteroides_thetaiotaomicron	PQPs	1	48	0.307
DA103	Bacteroides_massiliensis	PQPs	1	48	-0.026
DA183	Bacteroides_uniformis	PQPs	1	48	0.142
DA557	Bacteroides_fragilis	PQPs	1	48	0.184
DA679	Bacteroides_caccae	PQPs	1	48	0.237
DA816	Bacteroides_stercoris	PQPs	1	48	0.348
DA904	Bacteroides_faecichinchillae	PQPs	1	48	-0.025
DA1209	Bacteroides_sartorii	PQPs	1	48	0.238
DA1247	Bacteroides_salyersiae	PQPs	1	48	0.374
DA1479	Bacteroides_intestinalis_A	PQPs	1	48	0.099
DA14	Bacteroides_xylanisolvens	PQPs	1	48	0.164
DA647	Bacteroides_clarus	PQPs	1	48	0.167
DA672	Parabacteroides_faecis	PQPs	1	48	-0.002
DA21	Parabacteroides_merdae	RPPs	1	48	0.001
DA26	Bacteroides_dorei	RPPs	1	48	0.212
DA57	Bacteroides_vulgatus	RPPs	1	48	0.179
DA173	Bacteroides_bouchesdurhonensis	RPPs	1	48	0.008
DA320	Bacteroides_cellulosilyticus	RPPs	1	48	0.025
DA347	Bacteroides_sp900066265	RPPs	1	48	0.162
DA486	Bacteroides_fragilis_A	RPPs	1	48	0.023
DA505	Bacteroides_ovatus	RPPs	1	48	0.15
DA701	Parabacteroides_johnsonii	RPPs	1	48	0.005
DA729	Parabacteroides_goldsteinii	RPPs	1	48	0.003
DA1114	Bacteroides_eggerthii	RPPs	1	48	0.011
DA1414	Bacteroides_faecis	RPPs	1	48	0.013
DA1439	Bacteroides_sp003545565	RPPs	1	48	0.215
DA1461	Bacteroides_oleiciplenus	RPPs	1	48	0.176
DA104	Parabacteroides_distasonis	RPPs	1	48	0.007
DA16	Bacteroides_thetaiotaomicron	RPPs	1	48	0.013
DA103	Bacteroides_massiliensis	RPPs	1	48	0.002
DA183	Bacteroides_uniformis	RPPs	1	48	0.053
DA557	Bacteroides_fragilis	RPPs	1	48	0.225
DA679	Bacteroides_caccae	RPPs	1	48	0.215
DA816	Bacteroides_stercoris	RPPs	1	48	0.209
DA904	Bacteroides_faecichinchillae	RPPs	1	48	0.064
DA1209	Bacteroides_sartorii	RPPs	1	48	0.267
DA1247	Bacteroides_salyersiae	RPPs	1	48	0.032
DA1479	Bacteroides_intestinalis_A	RPPs	1	48	0.043
DA14	Bacteroides_xylanisolvens	RPPs	1	48	0.225
DA647	Bacteroides_clarus	RPPs	1	48	0.039
DA672	Parabacteroides_faecis	RPPs	1	48	0.041
DA21	Parabacteroides_merdae	CPPs	1	48	0.004
DA26	Bacteroides_dorei	CPPs	1	48	0.174
DA57	Bacteroides_vulgatus	CPPs	1	48	0.204
DA173	Bacteroides_bouchesdurhonensis	CPPs	1	48	0.061
DA320	Bacteroides_cellulosilyticus	CPPs	1	48	0.066
DA347	Bacteroides_sp900066265	CPPs	1	48	0.19
DA486	Bacteroides_fragilis_A	CPPs	1	48	0.346
DA505	Bacteroides_ovatus	CPPs	1	48	0.438
DA701	Parabacteroides_johnsonii	CPPs	1	48	0.011
DA729	Parabacteroides_goldsteinii	CPPs	1	48	0.135
DA1114	Bacteroides_eggerthii	CPPs	1	48	0.007
DA1414	Bacteroides_faecis	CPPs	1	48	0.352
DA1439	Bacteroides_sp003545565	CPPs	1	48	0.056
DA1461	Bacteroides_oleiciplenus	CPPs	1	48	0.048
DA104	Parabacteroides_distasonis	CPPs	1	48	0.045
DA16	Bacteroides_thetaiotaomicron	CPPs	1	48	0.06
DA103	Bacteroides_massiliensis	CPPs	1	48	-0.005
DA183	Bacteroides_uniformis	CPPs	1	48	0.061
DA557	Bacteroides_fragilis	CPPs	1	48	0.416
DA679	Bacteroides_caccae	CPPs	1	48	0.439
DA816	Bacteroides_stercoris	CPPs	1	48	0.268
DA904	Bacteroides_faecichinchillae	CPPs	1	48	0.113
DA1209	Bacteroides_sartorii	CPPs	1	48	0.476
DA1247	Bacteroides_salyersiae	CPPs	1	48	0.487
DA1479	Bacteroides_intestinalis_A	CPPs	1	48	0.064
DA14	Bacteroides_xylanisolvens	CPPs	1	48	0.064
DA647	Bacteroides_clarus	CPPs	1	48	0.069
DA672	Parabacteroides_faecis	CPPs	1	48	0.001
DA21	Parabacteroides_merdae	AdPs	1	48	0.023
DA26	Bacteroides_dorei	AdPs	1	48	0.43
DA57	Bacteroides_vulgatus	AdPs	1	48	0.512
DA173	Bacteroides_bouchesdurhonensis	AdPs	1	48	0.048
DA320	Bacteroides_cellulosilyticus	AdPs	1	48	0.095
DA347	Bacteroides_sp900066265	AdPs	1	48	0.319
DA486	Bacteroides_fragilis_A	AdPs	1	48	0.083
DA505	Bacteroides_ovatus	AdPs	1	48	0.44
DA701	Parabacteroides_johnsonii	AdPs	1	48	0.003
DA729	Parabacteroides_goldsteinii	AdPs	1	48	0.006
DA1114	Bacteroides_eggerthii	AdPs	1	48	0.35
DA1414	Bacteroides_faecis	AdPs	1	48	0.416
DA1439	Bacteroides_sp003545565	AdPs	1	48	0.477
DA1461	Bacteroides_oleiciplenus	AdPs	1	48	0.078
DA104	Parabacteroides_distasonis	AdPs	1	48	0.012
DA16	Bacteroides_thetaiotaomicron	AdPs	1	48	0.419
DA103	Bacteroides_massiliensis	AdPs	1	48	-0.003
DA183	Bacteroides_uniformis	AdPs	1	48	0.016
DA557	Bacteroides_fragilis	AdPs	1	48	0.42
DA679	Bacteroides_caccae	AdPs	1	48	0.166
DA816	Bacteroides_stercoris	AdPs	1	48	0.322
DA904	Bacteroides_faecichinchillae	AdPs	1	48	0.013
DA1209	Bacteroides_sartorii	AdPs	1	48	0.297
DA1247	Bacteroides_salyersiae	AdPs	1	48	0.54
DA1479	Bacteroides_intestinalis_A	AdPs	1	48	0.205
DA14	Bacteroides_xylanisolvens	AdPs	1	48	0.345
DA647	Bacteroides_clarus	AdPs	1	48	0.011
DA672	Parabacteroides_faecis	AdPs	1	48	0.031
DA21	Parabacteroides_merdae	SPs	1	48	0.07
DA26	Bacteroides_dorei	SPs	1	48	0.545
DA57	Bacteroides_vulgatus	SPs	1	48	0.292
DA173	Bacteroides_bouchesdurhonensis	SPs	1	48	0.237
DA320	Bacteroides_cellulosilyticus	SPs	1	48	0.22
DA347	Bacteroides_sp900066265	SPs	1	48	0.156
DA486	Bacteroides_fragilis_A	SPs	1	48	0.533
DA505	Bacteroides_ovatus	SPs	1	48	0.549
DA701	Parabacteroides_johnsonii	SPs	1	48	-0.007
DA729	Parabacteroides_goldsteinii	SPs	1	48	0.009
DA1114	Bacteroides_eggerthii	SPs	1	48	0.094
DA1414	Bacteroides_faecis	SPs	1	48	0.045
DA1439	Bacteroides_sp003545565	SPs	1	48	0.507
DA1461	Bacteroides_oleiciplenus	SPs	1	48	0.335
DA104	Parabacteroides_distasonis	SPs	1	48	0.31
DA16	Bacteroides_thetaiotaomicron	SPs	1	48	0.012
DA103	Bacteroides_massiliensis	SPs	1	48	0.017
DA183	Bacteroides_uniformis	SPs	1	48	0.043
DA557	Bacteroides_fragilis	SPs	1	48	0.45
DA679	Bacteroides_caccae	SPs	1	48	0.011
DA816	Bacteroides_stercoris	SPs	1	48	0.014
DA904	Bacteroides_faecichinchillae	SPs	1	48	0.014
DA1209	Bacteroides_sartorii	SPs	1	48	0.018
DA1247	Bacteroides_salyersiae	SPs	1	48	0.009
DA1479	Bacteroides_intestinalis_A	SPs	1	48	0.557
DA14	Bacteroides_xylanisolvens	SPs	1	48	0.349
DA647	Bacteroides_clarus	SPs	1	48	0.024
DA672	Parabacteroides_faecis	SPs	1	48	0.014
DA21	Parabacteroides_merdae	RAPs	1	48	0.032
DA26	Bacteroides_dorei	RAPs	1	48	0.137
DA57	Bacteroides_vulgatus	RAPs	1	48	0.139
DA173	Bacteroides_bouchesdurhonensis	RAPs	1	48	0.038
DA320	Bacteroides_cellulosilyticus	RAPs	1	48	0.029
DA347	Bacteroides_sp900066265	RAPs	1	48	0.461
DA486	Bacteroides_fragilis_A	RAPs	1	48	0.364
DA505	Bacteroides_ovatus	RAPs	1	48	0.434
DA701	Parabacteroides_johnsonii	RAPs	1	48	0.031
DA729	Parabacteroides_goldsteinii	RAPs	1	48	0.144
[truncated: 14,847 more rows]

## Sheet: SupTable5
Supplementary Table 5A Standard curve of total sugar content
group	id	sugar concerntration(g/L)	absorbtion			average	sugar content(%)
standard	0	0	0			0	100
	1	0.01	0.163	0.164	0.164	0.164
	2	0.02	0.328	0.334	0.325	0.329
	3	0.03	0.467	0.467	0.48	0.471
	4	0.04	0.625	0.644	0.64	0.636
	5	0.05	0.807	0.803	0.816	0.809
	6	0.06	0.961	0.959	0.964	0.961
mearsure	APs	-	0.553	0.535	0.473	0.52	54
	DPs1		0.351	0.296	0.286	0.311	32.2
	DPs2		0.809	0.841	0.801	0.817	84.9
	GLPs1		0.542	0.504	0.484	0.51	53
	GLPs2		0.318	0.297	0.281	0.299	31
	GPs		0.762	0.745	0.685	0.731	75.9
	LBPs1		0.326	0.293	0.294	0.304	31.6
	LBPs2		0.266	0.224	0.245	0.245	25.4
Supplementary Table 5B Standard curve of total sugar content
group	id	sugar concerntration(g/L)	absorbtion			average	sugar content(%)
standard	0	0	0			0	100
	1	0.02	0.062	0.061	0.063	0.062
	2	0.04	0.135	0.133	0.134	0.134
	3	0.06	0.191	0.192	0.193	0.192
	4	0.08	0.25	0.25	0.247	0.249
	5	0.1	0.34	0.344	0.343	0.342
	6	0.12	0.41	0.41	0.38	0.4
	7	0.14	0.46	0.462	0.461	0.461
measure	PSPs	-	0.26	0.243	0.253	0.252	77.29
	AdPs		0.143	0.141	0.142	0.142	44.88
	SPs		0.12	0.119	0.118	0.119	37.59
	PLPs		0.316	0.317	0.315	0.316	96.32
	RPPs		0.136	0.133	0.135	0.135	42.35
	RAPs		0.146	0.143	0.145	0.145	45.32
	RNPs		0.292	0.268	0.28	0.28	85.62
	PQPs		0.049	0.048	0.047	0.048	16.48
	PPs		0.322	0.32	0.321	0.321	97.66
	AnPs		0.111	0.112	0.113	0.112	35.51
	CPPs		0.322	0.32	0.321	0.321	97.66
	HAPs		0.121	0.129	0.125	0.125	39.52

## Sheet: SupTable6
Supplementary Table 6 Standard curve of the molercular weight
RT(min)	Mw(Da)
10.167	670000
10.227	410000
10.28	270000
10.906	150000
11.374	80000
11.771	50000
12.57	25000
13.579	12000
14.32	5000
15.468	1000
15.608	666
17.075	180

## Sheet: SupTable7
Supplementary Table 7 The monosaccharide composition and relative abundance of HMPs
%	Man	GlcA	Rha	GalA	Glc	Gal	Xyl	Ara	Fuc
LBPs_1	2.8	0	5.2	23.4	7.7	22.6	0	36.9	0
LBPs_2	3	1.1	5.2	39	16	33.5	0	1.7	0
GLPs_1	4.6	3.6	0	0	72.2	0	12.5	0	6.3
GLPs_2	7.5	2	0	0	68.3	13.7	0	1.5	6.9
APs	0	0	0	3	92.8	0	2.5	1.7	0
GPs	0	0	0	0	93.1	0	0	2.9	1.6
DPs_1	81.1	0	0	0	16.9	0	0	0	0
DPs_2	78.7	0	0	0	19.8	0	0	0	0

## Sheet: SupTable8
Supplementary Table 8 Fold change (log2) of gene expression of Phocaeicola vulgatus under GPs
Gene_ID	count_Bv.GPs	count_Bv.Glu	fpkm_Bv.GPs	fpkm_Bv.Glu	log2FC	PValue	FDR	prot	description	log10PValue	sig	pulid	Enzyme
FHJOOPKJ_00822	9271.33	0	967.217	0	16.3536	0	0	WP_117699461.1	SusD/RagB family nutrient-binding outer membrane lipoprotein [Phocaeicola vulgatus]	400	up	PUL12	susD
FHJOOPKJ_01280	1216.67	0	4704.32	0	13.438	1.58808e-172	4.42377e-171	EGX27617.1	hypothetical protein BSFG_04635 [Bacteroides sp. 4_3_47FAA]	171.799	up	PUL19	Unk
FHJOOPKJ_00823	13331	2.66667	729.053	0.116667	12.5439	0	0	WP_117699462.1	SusC/RagA family TonB-linked outer membrane protein [Phocaeicola vulgatus]	400	up	PUL12	susC
FHJOOPKJ_01281	39439	9	3037.84	0.55	12.3996	0	0	WP_057279823.1	MULTISPECIES: glycoside hydrolase family 97 protein [Bacteroidaceae]	400	up	PUL19	GH97
FHJOOPKJ_01276	26211.7	13	3393.3	1.33	11.286	0	0	WP_016271141.1	SusF/SusE family outer membrane protein [Phocaeicola vulgatus]	400	up	PUL19	Unk
FHJOOPKJ_01282	9264.33	5	873.423	0.356667	11.1429	0	0	WP_016271146.1	glycoside hydrolase family 13 protein [Phocaeicola vulgatus]	400	up	PUL19	GH13_20
FHJOOPKJ_01275	14938.3	10.3333	975.877	0.54	10.8	0	0	WP_117694575.1	alpha-amylase [Phocaeicola vulgatus]	400	up	PUL19	GH13_10
FHJOOPKJ_01277	23681.3	16.6667	3987.52	2.20667	10.7806	0	0	WP_016275170.1	MULTISPECIES: SusF/SusE family outer membrane protein [Phocaeicola]	400	up	PUL19	Unk
FHJOOPKJ_01278	34463.3	36	3604	2.92333	10.2214	0	0	WP_016271143.1	RagB/SusD family nutrient uptake outer membrane protein [Phocaeicola vulgatus]	400	up	PUL19	susD
FHJOOPKJ_01279	60602.3	69	3320.15	2.91	10.1024	0	0	WP_117699661.1	TonB-dependent receptor [Phocaeicola vulgatus]	400	up	PUL19	susC
FHJOOPKJ_00884	31.6667	0	3.13	0	8.182	1.30797e-18	4.29028e-18	WP_057280618.1	MULTISPECIES: arabinan endo-1,5-alpha-L-arabinosidase [Phocaeicola]	17.8834	up	PUL14	GH43_4
FHJOOPKJ_01287	30.3333	0	8.38667	0	8.10233	6.87271e-23	2.59455e-22	WP_229104227.1	hypothetical protein [Phocaeicola vulgatus]	22.1629	up
FHJOOPKJ_00078	530.333	3	24.6767	0.1	7.7274	1.26552e-285	7.15894e-284	WP_202191004.1	TonB-dependent receptor [Phocaeicola vulgatus]	284.898	up	PUL3	susC
FHJOOPKJ_01290	3219	20.6667	437.63	2.21333	7.59683	0	0	WP_057280470.1	MFS transporter [Phocaeicola vulgatus]	400	up
FHJOOPKJ_01343	3747	26	433.58	2.29667	7.49406	0	0	WP_005840724.1	MULTISPECIES: RagB/SusD family nutrient uptake outer membrane protein [Bacteroidaceae]	400	up	PUL21	susD
FHJOOPKJ_01858	47	0.333333	5.23	0.0333333	6.96494	4.63527e-36	2.4991e-35	WP_038611876.1	MULTISPECIES: RagB/SusD family nutrient uptake outer membrane protein [Bacteroidaceae]	35.3339	up	PUL30	susD
FHJOOPKJ_00623	410.333	4.33333	20.83	0.166667	6.84923	6.97377e-203	2.37431e-201	WP_032953506.1	MULTISPECIES: TonB-dependent receptor [Bacteroidaceae]	202.157	up
FHJOOPKJ_01678	1363.33	19.3333	69.8033	0.773333	6.45465	0	0	WP_057098829.1	MULTISPECIES: TonB-dependent receptor [Phocaeicola]	400	up	PUL24	susC
FHJOOPKJ_02874	6608	101.333	678.503	8.14333	6.34721	0	0	WP_008671127.1	MULTISPECIES: RagB/SusD family nutrient uptake outer membrane protein [Bacteroidaceae]	400	up	PUL38	susD
FHJOOPKJ_02181	29.3333	0.333333	3.25	0.03	6.29237	3.31304e-22	1.22433e-21	WP_011965061.1	MULTISPECIES: RagB/SusD family nutrient uptake outer membrane protein [Phocaeicola]	21.4798	up	PUL33	susD
FHJOOPKJ_01289	70	1	40.7333	0.456667	6.26783	1.41293e-57	1.19708e-56	WP_005838929.1	MULTISPECIES: AraC family transcriptional regulator [Bacteroidaceae]	56.8499	up
FHJOOPKJ_01344	10290	178.333	558.083	7.46	6.17728	0	0	WP_041174394.1	MULTISPECIES: TonB-dependent receptor [Bacteroidaceae]	400	up	PUL21	susC
FHJOOPKJ_01859	98.6667	1.66667	5.12667	0.0633333	6.09707	3.94885e-70	3.9672e-69	WP_038611873.1	MULTISPECIES: SusC/RagA family TonB-linked outer membrane protein [Bacteroidaceae]	69.4035	up	PUL30	susC
FHJOOPKJ_03172	386	7	18.6133	0.26	6.08421	1.84372e-170	5.02175e-169	WP_118327924.1	TonB-dependent receptor [Phocaeicola vulgatus]	169.734	up	PUL43	susC
FHJOOPKJ_02300	13505	258.667	1065.7	15.8633	6.02635	0	0	WP_005841163.1	MULTISPECIES: elongation factor G [Bacteroidaceae]	400	up
FHJOOPKJ_00885	40.6667	0.666667	4.09667	0.0466667	5.98733	6.36654e-34	3.25136e-33	WP_117699488.1	bacterial Ig-like domain-containing protein [Phocaeicola vulgatus]	33.1961	up	PUL14	Unk
FHJOOPKJ_01286	6.66667	0	8.77333	0	5.93009	1.60409e-06	3.03408e-06	WP_016271149.1	ATP-binding protein [Phocaeicola vulgatus]	5.79477	up
FHJOOPKJ_00887	70.6667	1.33333	3.67667	0.0566667	5.90867	3.47082e-50	2.59922e-49	WP_117699489.1	TonB-dependent receptor [Phocaeicola vulgatus]	49.4596	up	PUL14	susC
FHJOOPKJ_03171	84	1.66667	9.25	0.133333	5.8653	4.81241e-61	4.24346e-60	WP_118327925.1	SusD/RagB family nutrient-binding outer membrane lipoprotein [Phocaeicola vulgatus]	60.3176	up	PUL43	susD
FHJOOPKJ_00079	52.6667	1	10.2533	0.146667	5.86474	5.58542e-35	2.94657e-34	WP_005841948.1	MULTISPECIES: FecR family protein [Phocaeicola]	34.2529	up
FHJOOPKJ_02873	26151.3	573.333	1422.44	24.2967	5.83297	0	0	WP_117699534.1	TonB-dependent receptor [Phocaeicola vulgatus]	400	up	PUL38	susC
FHJOOPKJ_00076	111.667	2.33333	13.3067	0.216667	5.82423	1.01917e-77	1.09256e-76	WP_007839489.1	MULTISPECIES: pectate lyase [Bacteroidaceae]	76.9918	up	PUL3	PL10_2
FHJOOPKJ_00098	1130	25	57.0467	0.973333	5.82394	7.6974e-272	4.10193e-270	WP_117696231.1	TonB-dependent receptor [Phocaeicola vulgatus]	271.114	up	PUL4	susC
FHJOOPKJ_01091	1623.67	37	127.987	2.26333	5.77459	0	0	WP_005846125.1	MULTISPECIES: sodium-translocating pyrophosphatase [Bacteroidaceae]	400	up
FHJOOPKJ_04115	1311	30.6667	64.8267	1.18333	5.73469	0	0	WP_005850665.1	MULTISPECIES: TonB-dependent receptor [Bacteroidaceae]	400	up	PUL55	susC
FHJOOPKJ_00835	47	1	2.38	0.04	5.69617	7.17993e-33	3.57248e-32	WP_117699468.1	TonB-dependent receptor [Phocaeicola vulgatus]	32.1439	up	PUL13	susC
FHJOOPKJ_01288	5378.33	130.333	373.107	7.02667	5.6944	0	0	WP_117696168.1	PL29 family lyase N-terminal domain-containing protein [Phocaeicola vulgatus]	400	up
FHJOOPKJ_00099	601	15.3333	44.7533	0.88	5.60703	9.54967e-269	4.94565e-267	WP_117696232.1	RagB/SusD family nutrient uptake outer membrane protein [Phocaeicola vulgatus]	268.02	up	PUL4	susD
FHJOOPKJ_01587	43.6667	1	174.723	2.59333	5.59119	2.12209e-34	1.09901e-33	WP_005848831.1	MULTISPECIES: hypothetical protein [Bacteroidaceae]	33.6732	up
FHJOOPKJ_00075	251	7.33333	19.0733	0.446667	5.39173	8.04221e-145	1.72931e-143	WP_005841939.1	hypothetical protein [Phocaeicola vulgatus]	144.095	up	PUL3	Unk
FHJOOPKJ_02183	37	1	2.63	0.0566667	5.35974	6.03091e-20	2.05711e-19	WP_008666516.1	MULTISPECIES: glycoside hydrolase family 127 protein [Bacteroidaceae]	19.2196	up	PUL33	GH127
FHJOOPKJ_01677	368.333	11.3333	34.6167	0.81	5.33857	5.17073e-125	9.45909e-124	WP_182830328.1	RagB/SusD family nutrient uptake outer membrane protein [Phocaeicola vulgatus]	124.286	up	PUL24	susD
FHJOOPKJ_00074	235	7.33333	19.0333	0.466667	5.30107	1.75278e-119	3.04009e-118	WP_117695245.1	hypothetical protein [Phocaeicola vulgatus]	118.756	up	PUL3	Unk
FHJOOPKJ_00224	213	6.66667	389.777	9.16667	5.28667	3.79136e-94	5.01469e-93	WP_008670741.1	MULTISPECIES: NVEALA domain-containing protein [Bacteroidaceae]	93.4212	up
FHJOOPKJ_01291	12155.7	400.333	762.883	19.53	5.24862	0	0	WP_117699663.1	4-alpha-glucanotransferase [Phocaeicola vulgatus]	400	up
FHJOOPKJ_04114	384	12.6667	43.9533	1.11	5.23339	5.36513e-193	1.76139e-191	WP_117700346.1	RagB/SusD family nutrient uptake outer membrane protein [Phocaeicola vulgatus]	192.27	up	PUL55	susD
FHJOOPKJ_02015	750.333	28.6667	91.13	2.64667	5.03332	3.6729e-258	1.8007e-256	WP_016271845.1	M28 family peptidase [Phocaeicola vulgatus]	257.435	up
FHJOOPKJ_00077	162.333	6.33333	15.0433	0.453333	4.9754	3.56589e-96	4.82051e-95	WP_007831581.1	MULTISPECIES: RagB/SusD family nutrient uptake outer membrane protein [Bacteroidaceae]	95.4478	up	PUL3	susD
FHJOOPKJ_00644	35.6667	1.33333	6.87667	0.213333	4.91735	2.90172e-22	1.07557e-21	WP_229531951.1	DUF4974 domain-containing protein [Phocaeicola vulgatus]	21.5373	up
FHJOOPKJ_01588	672.667	28.3333	140.413	4.59	4.88151	1.16447e-174	3.31919e-173	WP_117695110.1	alpha/beta hydrolase [Phocaeicola vulgatus]	173.934	up
FHJOOPKJ_00861	23.6667	1	99.5233	3.19667	4.71043	2.05043e-16	6.24641e-16	WP_153868476.1	MULTISPECIES: hypothetical protein [Bacteroidaceae]	15.6882	up
FHJOOPKJ_01676	220	10.6667	24.9833	0.906667	4.67727	5.57955e-112	8.80516e-111	WP_117699830.1	sulfatase [Phocaeicola vulgatus]	111.253	up	PUL24	Unk
FHJOOPKJ_00616	136	6.66667	6.92667	0.27	4.64389	9.15332e-78	9.84116e-77	WP_011965344.1	TonB-dependent receptor [Phocaeicola vulgatus]	77.0384	up	PUL9	susC
FHJOOPKJ_03312	207.667	10.3333	30.2533	1.16333	4.63442	4.80002e-89	6.04441e-88	WP_016270413.1	hypothetical protein [Phocaeicola vulgatus]	88.3188	up
FHJOOPKJ_03173	260.667	13	56.9267	2.24333	4.63218	3.27111e-126	6.07469e-125	EFG19460.1	sigma factor regulatory protein, FecR/PupR family [Phocaeicola vulgatus PC510]	125.485	up	PUL43	Unk
FHJOOPKJ_01865	68	3.33333	8.76667	0.326667	4.61764	9.81934e-46	6.79957e-45	WP_172770166.1	glycosyl hydrolase family 28 protein [Phocaeicola vulgatus]	45.0079	up	PUL30	GH28
FHJOOPKJ_00762	873	44.6667	71.4333	2.84667	4.60945	8.86093e-248	4.17713e-246	WP_008668793.1	MULTISPECIES: M3 family metallopeptidase [Bacteroidaceae]	247.053	up
FHJOOPKJ_02010	890.333	45.6667	491.293	19.2467	4.60057	5.43374e-238	2.43657e-236	WP_005839187.1	MULTISPECIES: DUF4488 domain-containing protein [Bacteroidaceae]	237.265	up
FHJOOPKJ_00636	174	9	14.1967	0.573333	4.57585	1.0948e-99	1.55428e-98	MBT0708449.1	Glycosyl hydrolases family 43 [Phocaeicola vulgatus]	98.9607	up	PUL10	GH43_10
FHJOOPKJ_02307	272.667	14.3333	18.6267	0.736667	4.56332	9.54819e-81	1.07039e-79	ALK86294.1	glycoside hydrolase family protein [Phocaeicola vulgatus]	80.0201	up
FHJOOPKJ_02182	52.6667	2.66667	2.86667	0.11	4.56188	6.3355e-35	3.33516e-34	WP_117699922.1	TonB-dependent receptor [Phocaeicola vulgatus]	34.1982	up	PUL33	susC
FHJOOPKJ_04054	388.333	20.6667	46.59	1.92333	4.55269	2.38101e-117	3.99771e-116	WP_110506605.1	MULTISPECIES: RagB/SusD family nutrient uptake outer membrane protein [Bacteroidaceae]	116.623	up	PUL54	susD
FHJOOPKJ_03042	416.667	22.3333	23.0867	0.963333	4.54686	8.49765e-107	1.29651e-105	WP_117700086.1	TonB-dependent receptor [Phocaeicola vulgatus]	106.071	up	PUL42	susC
FHJOOPKJ_01601	8220.67	437.667	568.297	23.7233	4.54367	0	0	WP_117709921.1	TonB-dependent receptor [Phocaeicola vulgatus]	400	up
FHJOOPKJ_00464	8.66667	0.333333	15.0967	0.466667	4.54292	8.48758e-07	1.63654e-06	ABR41215.1	hypothetical protein BVU_3602 [Phocaeicola vulgatus ATCC 8482]	6.07122	up
FHJOOPKJ_00886	32.6667	1.66667	3.30667	0.14	4.49864	2.74071e-18	8.92613e-18	WP_005844363.1	MULTISPECIES: RagB/SusD family nutrient uptake outer membrane protein [Bacteroidaceae]	17.5621	up	PUL14	susD
FHJOOPKJ_02110	1152.33	64.6667	179.8	7.73667	4.47984	0	0	WP_008668672.1	MULTISPECIES: TlpA family protein disulfide reductase [Bacteroidaceae]	400	up
FHJOOPKJ_03773	168.333	9.33333	9.77333	0.423333	4.47703	1.12072e-82	1.29181e-81	WP_117720064.1	family 43 glycosylhydrolase [Phocaeicola vulgatus]	81.9505	up	PUL51	GH43_10
FHJOOPKJ_00645	59.3333	3.33333	2.91	0.13	4.42962	1.58333e-30	7.35087e-30	KAB5414697.1	TonB-dependent receptor [Phocaeicola vulgatus]	29.8004	up	PUL11	susC
FHJOOPKJ_01869	199.333	11.6667	10.96	0.5	4.40519	8.29483e-90	1.05537e-88	WP_005844574.1	MULTISPECIES: TonB-dependent receptor [Bacteroidaceae]	89.0812	up	PUL30	susC
FHJOOPKJ_00646	25	1.33333	2.39333	0.103333	4.39398	7.18695e-10	1.63631e-09	WP_115648959.1	RagB/SusD family nutrient uptake outer membrane protein [Phocaeicola vulgatus]	9.14346	up	PUL11	susD
FHJOOPKJ_00834	18.6667	1	1.7	0.07	4.37035	3.55032e-13	9.46667e-13	WP_117699467.1	RagB/SusD family nutrient uptake outer membrane protein [Phocaeicola vulgatus]	12.4497	up	PUL13	susD
FHJOOPKJ_03314	349	21	18.2233	0.856667	4.36987	2.07608e-159	5.02221e-158	WP_117875587.1	TonB-dependent receptor [Phocaeicola vulgatus]	158.683	up	PUL46	susC
FHJOOPKJ_02157	545.667	33	49.1	2.3	4.36561	3.37296e-203	1.17003e-201	WP_007834228.1	MULTISPECIES: RagB/SusD family nutrient uptake outer membrane protein [Bacteroidaceae]	202.472	up	PUL32	susD
FHJOOPKJ_01225	101	6	7.5	0.36	4.35517	1.39071e-46	9.79623e-46	WP_118289881.1	outer membrane beta-barrel protein [Phocaeicola vulgatus]	45.8568	up
FHJOOPKJ_03654	5397.67	342.667	636.06	31.29	4.30066	0	0	WP_044468231.1	MULTISPECIES: RagB/SusD family nutrient uptake outer membrane protein [Bacteroides]	400	up	PUL50	susD
FHJOOPKJ_02972	365.667	23.3333	20.23	1	4.2902	1.1822e-147	2.60296e-146	WP_005839124.1	MULTISPECIES: TonB-dependent receptor [Bacteroidaceae]	146.927	up	PUL40	susC
FHJOOPKJ_03830	54	3.33333	7.91333	0.38	4.27972	1.61161e-27	6.99634e-27	WP_005843574.1	MULTISPECIES: L-fucose:H+ symporter permease [Bacteroidaceae]	26.7927	up
FHJOOPKJ_02700	58	3.66667	12.59	0.626667	4.25941	4.59432e-30	2.09594e-29	WP_012056025.1	MULTISPECIES: hypothetical protein [Bacteroidaceae]	29.3378	up
FHJOOPKJ_02304	336.667	22	28.9467	1.47	4.24922	8.83201e-139	1.82445e-137	WP_008670148.1	MULTISPECIES: alpha-glucuronidase [Bacteroidaceae]	138.054	up
FHJOOPKJ_03555	87.6667	5.66667	22.6333	1.16667	4.24073	1.60966e-50	1.21784e-49	WP_005840958.1	MULTISPECIES: helix-turn-helix domain-containing protein [Bacteroidaceae]	49.7933	up
FHJOOPKJ_02835	3507.33	233.333	1642.19	82.8233	4.23658	0	0	WP_005846229.1	MULTISPECIES: hypothetical protein [Bacteroidaceae]	400	up
FHJOOPKJ_04053	934.667	62	46.0133	2.39333	4.23568	4.09545e-235	1.73092e-233	WP_117833933.1	TonB-dependent receptor [Phocaeicola vulgatus]	234.388	up	PUL54	susC
FHJOOPKJ_03043	255.333	17	28.19	1.47667	4.2217	1.10912e-120	1.94201e-119	WP_057098616.1	RagB/SusD family nutrient uptake outer membrane protein [Phocaeicola vulgatus]	119.955	up	PUL42	susD
FHJOOPKJ_01338	80.6667	5.33333	4.31667	0.213333	4.21814	3.36064e-37	1.85821e-36	WP_022508191.1	MULTISPECIES: TonB-dependent receptor [Bacteroidaceae]	36.4736	up	PUL21	susC
FHJOOPKJ_01267	782.667	53	110.117	5.71333	4.21167	1.08338e-185	3.37592e-184	WP_016271134.1	MULTISPECIES: L-fucose:H+ symporter permease [Bacteroidaceae]	184.965	up
FHJOOPKJ_01866	66	4.33333	4.78	0.25	4.20646	2.78458e-36	1.50572e-35	WP_172770167.1	GH92 family glycosyl hydrolase [Phocaeicola vulgatus]	35.5552	up	PUL30	GH92
FHJOOPKJ_03313	196	13.6667	19.4133	1.02667	4.16178	6.09351e-71	6.15545e-70	WP_008667020.1	MULTISPECIES: RagB/SusD family nutrient uptake outer membrane protein [Bacteroidaceae]	70.2151	up	PUL46	susD
FHJOOPKJ_02156	296	20.6667	38.1933	2.06667	4.15686	2.93836e-137	5.84019e-136	WP_007834230.1	MULTISPECIES: sulfatase [Bacteroidaceae]	136.532	up	PUL32	Unk
FHJOOPKJ_00637	86.6667	6	10.0367	0.543333	4.14394	3.13368e-45	2.13381e-44	WP_081030211.1	RagB/SusD family nutrient uptake outer membrane protein [Phocaeicola vulgatus]	44.5039	up	PUL10	susD
FHJOOPKJ_04055	155.333	11	25.4533	1.4	4.13153	1.16115e-53	9.26147e-53	WP_117700360.1	metallophosphoesterase [Phocaeicola vulgatus]	52.9351	up
FHJOOPKJ_01867	29.3333	2	7.70667	0.386667	4.11409	3.21192e-18	1.04423e-17	WP_172770168.1	glycerophosphodiester phosphodiesterase family protein [Phocaeicola vulgatus]	17.4932	up	PUL30	Unk
FHJOOPKJ_01971	422.667	30.6667	306.12	16.7767	4.10572	2.72665e-153	6.26619e-152	WP_005838664.1	MULTISPECIES: amino acid-binding protein [Bacteroidaceae]	152.564	up
FHJOOPKJ_03179	175.667	12.6667	78.6	4.3	4.1025	2.38047e-87	2.89834e-86	WP_005839094.1	MULTISPECIES: RNA polymerase sigma-70 factor [Bacteroidaceae]	86.6233	up
FHJOOPKJ_00022	537.333	39.3333	51.9433	2.97	4.09245	9.77848e-149	2.17912e-147	WP_005843046.1	MULTISPECIES: RagB/SusD family nutrient uptake outer membrane protein [Bacteroidaceae]	148.01	up	PUL1	susD
FHJOOPKJ_00862	65.6667	4.66667	21.0633	1.23	4.09223	2.17327e-35	1.15813e-34	WP_032940729.1	MULTISPECIES: hypothetical protein [Bacteroidaceae]	34.6629	up
FHJOOPKJ_03653	14240.3	1043.67	733.703	41.9	4.09175	0	0	WP_044468230.1	MULTISPECIES: TonB-dependent receptor [Bacteroides]	400	up	PUL50	susC
FHJOOPKJ_00824	292	21.3333	136.98	7.47	4.09012	2.8161e-119	4.86141e-118	WP_117695895.1	RNA polymerase sigma-70 factor [Phocaeicola vulgatus]	118.55	up
FHJOOPKJ_02158	1223.33	91.3333	57.1367	3.31333	4.07025	2.23116e-238	1.01284e-236	WP_118292146.1	TonB-dependent receptor [Phocaeicola vulgatus]	237.651	up	PUL32	susC
FHJOOPKJ_00888	232.333	17.3333	21.0733	1.19	4.06408	8.81406e-100	1.25617e-98	EFV69047.1	glycoside hydrolase family 97 [Bacteroides sp. 3_1_40A]	99.0548	up	PUL14	GH97
FHJOOPKJ_02973	173	13	19.2833	1.12	4.04164	5.06006e-77	5.39299e-76	WP_005839127.1	MULTISPECIES: RagB/SusD family nutrient uptake outer membrane protein [Bacteroidaceae]	76.2958	up	PUL40	susD
FHJOOPKJ_03357	202.667	15.3333	18.8233	1.07333	4.03956	5.58289e-97	7.65981e-96	ALK86303.1	RagB/SusD domain protein [Phocaeicola vulgatus]	96.2531	up	PUL48	susD
FHJOOPKJ_02688	2556	196.667	275.963	16.5133	4.0174	1.93628e-301	1.16716e-299	WP_005851277.1	MULTISPECIES: exo-alpha-sialidase [Bacteroidaceae]	300.713	up
FHJOOPKJ_01222	130	10	11.15	0.65	4.01031	5.37989e-67	5.12483e-66	WP_117699787.1	outer membrane beta-barrel protein [Phocaeicola vulgatus]	66.2692	up
FHJOOPKJ_02162	52.3333	4	5.2	0.306667	3.9922	6.75758e-24	2.62106e-23	WP_008666490.1	MULTISPECIES: RagB/SusD family nutrient uptake outer membrane protein [Bacteroidaceae]	23.1702	up	PUL32	susD
FHJOOPKJ_01864	60.6667	4.66667	4.55	0.286667	3.98045	2.25578e-34	1.16659e-33	WP_172770165.1	GH92 family glycosyl hydrolase [Phocaeicola vulgatus]	33.6467	up	PUL30	GH92
FHJOOPKJ_03829	171.667	13.6667	33.2433	2.07667	3.96146	3.6617e-66	3.43471e-65	WP_005843572.1	MULTISPECIES: zinc-binding alcohol dehydrogenase family protein [Bacteroidaceae]	65.4363	up
FHJOOPKJ_00195	460.667	37.3333	38.65	2.41	3.94839	8.03839e-153	1.83585e-151	WP_117699650.1	RNA degradosome polyphosphate kinase [Phocaeicola vulgatus]	152.095	up
FHJOOPKJ_02306	169.333	13.6667	19.4767	1.20667	3.94146	6.45439e-75	6.68529e-74	WP_005844640.1	MULTISPECIES: glycoside hydrolase 43 family protein [Bacteroidaceae]	74.1901	up
FHJOOPKJ_03775	427.333	35.3333	21.7333	1.39333	3.92057	8.69387e-121	1.52954e-119	KDS26715.1	tonB-linked outer membrane, SusC/RagA family protein [Phocaeicola vulgatus str. 3775 SL(B) 10 (iv)]	120.061	up	PUL51	susC
FHJOOPKJ_00635	110.333	9	12.34	0.8	3.91414	1.37387e-45	9.44248e-45	WP_057279516.1	glycoside hydrolase 43 family protein [Phocaeicola vulgatus]	44.8621	up	PUL10	GH43_10
FHJOOPKJ_02974	138	11.3333	8.81333	0.57	3.91313	6.57011e-70	6.58264e-69	WP_005839129.1	MULTISPECIES: family 43 glycosylhydrolase [Bacteroidaceae]	69.1824	up	PUL40	GH43_31
FHJOOPKJ_03947	202	16.6667	111.623	6.99333	3.91295	4.93317e-96	6.64442e-95	WP_117699602.1	hypothetical protein [Phocaeicola vulgatus]	95.3069	up
FHJOOPKJ_00638	435	36.3333	21.4167	1.40333	3.90317	1.02186e-139	2.12282e-138	WP_057279519.1	TonB-dependent receptor [Phocaeicola vulgatus]	138.991	up	PUL10	susC
FHJOOPKJ_01870	25.3333	2	4.29667	0.266667	3.89079	1.44905e-12	3.76547e-12	WP_172770170.1	heparan-alpha-glucosaminide N-acetyltransferase domain-containing protein [Phocaeicola vulgatus]	11.8389	up	PUL30	Unk
FHJOOPKJ_03449	21	1.66667	14.1833	0.826667	3.87904	6.60823e-11	1.59125e-10	EFG17392.1	N-acetylmuramoyl-L-alanine amidase [Phocaeicola vulgatus PC510]	10.1799	up
FHJOOPKJ_00020	535.667	45.6667	62.69	4.07667	3.87468	3.52881e-177	1.0298e-175	WP_115649105.1	Gfo/Idh/MocA family oxidoreductase [Phocaeicola vulgatus]	176.452	up	PUL1	GH109
FHJOOPKJ_01619	13	1	38.0833	1.93333	3.86538	1.99166e-08	4.18477e-08	ALK83874.1	rhamnogalacturonan acetylesterase [Phocaeicola vulgatus]	7.70078	up	PUL22	Unk
FHJOOPKJ_02303	447.333	39	40.4867	2.70333	3.84026	7.79352e-161	1.94238e-159	WP_008670146.1	MULTISPECIES: 9-O-acetylesterase [Bacteroidaceae]	160.108	up
FHJOOPKJ_00647	24	2	3.11333	0.196667	3.83979	1.42601e-10	3.38068e-10	WP_005849223.1	MULTISPECIES: sulfatase [Phocaeicola]	9.84588	up	PUL11	Unk
FHJOOPKJ_01868	119.333	10.3333	12.8633	0.876667	3.83254	2.55817e-58	2.2029e-57	ALK83230.1	SusD, outer membrane protein [Phocaeicola vulgatus]	57.5921	up	PUL30	susD
FHJOOPKJ_01178	1238	108.333	134.797	9.32333	3.82813	1.58451e-231	6.54633e-230	TSE50351.1	long-chain-fatty-acid--CoA ligase [Phocaeicola vulgatus]	230.8	up
FHJOOPKJ_00202	96	8.33333	11.1533	0.746667	3.82694	9.98193e-52	7.77618e-51	WP_005845681.1	MULTISPECIES: RagB/SusD family nutrient uptake outer membrane protein [Bacteroidaceae]	51.0008	up	PUL5	susD
FHJOOPKJ_02077	678.667	61	33.4467	2.35333	3.79536	2.1655e-190	6.86425e-189	WP_117833860.1	TonB-dependent receptor [Phocaeicola vulgatus]	189.664	up	PUL31	susC
FHJOOPKJ_00609	97.3333	9	10.7467	0.746667	3.74615	1.57537e-45	1.0787e-44	WP_016270969.1	pectate lyase [Phocaeicola vulgatus]	44.8026	up	PUL9	PL10_2
FHJOOPKJ_00023	1040	98.3333	50.2667	3.72	3.72243	5.51984e-169	1.49239e-167	WP_032946419.1	TonB-dependent receptor [Phocaeicola vulgatus]	168.258	up	PUL1	susC
FHJOOPKJ_01788	868	83	168.923	12.45	3.70961	3.60685e-205	1.31311e-203	WP_005850740.1	MULTISPECIES: L-rhamnose/proton symporter RhaT [Bacteroidaceae]	204.443	up
FHJOOPKJ_01187	232	22	27.8133	2.04667	3.70918	5.02184e-65	4.61632e-64	WP_117700177.1	L-lactate permease [Phocaeicola vulgatus]	64.2991	up
FHJOOPKJ_02305	458.333	43.6667	30.16	2.23	3.70832	1.91653e-115	3.14602e-114	WP_008670150.1	MULTISPECIES: glycosyl hydrolase 115 family protein [Bacteroidaceae]	114.717	up
FHJOOPKJ_00757	416.333	40	39.11	2.90333	3.70301	6.87524e-126	1.27036e-124	WP_016271192.1	gamma-glutamyl-gamma-aminobutyrate hydrolase family protein [Phocaeicola vulgatus]	125.163	up
FHJOOPKJ_00466	8268.33	795	394.223	29.54	3.69802	0	0	WP_181992091.1	bifunctional proline dehydrogenase/L-glutamate gamma-semialdehyde dehydrogenase [Phocaeicola vulgatus]	400	up
FHJOOPKJ_01309	90.6667	8.66667	8.6	0.616667	3.69564	4.67526e-41	2.86039e-40	WP_118433502.1	RagB/SusD family nutrient uptake outer membrane protein [Phocaeicola vulgatus]	40.3302	up	PUL20	susD
FHJOOPKJ_00859	348.667	33.6667	59.4167	4.41667	3.69354	1.12595e-126	2.10159e-125	WP_117699477.1	MULTISPECIES: 6-bladed beta-propeller [Bacteroidaceae]	125.948	up
FHJOOPKJ_01223	189.333	18.3333	66.3267	4.82	3.69097	4.97621e-68	4.87934e-67	WP_117699788.1	response regulator transcription factor [Phocaeicola vulgatus]	67.3031	up
FHJOOPKJ_00631	92.6667	9	11.4067	0.873333	3.66089	9.08475e-40	5.37052e-39	EFG17862.1	conserved hypothetical protein [Phocaeicola vulgatus PC510]	39.0417	up	PUL10	GH140
FHJOOPKJ_00866	150	14.6667	615.617	45.3267	3.65994	4.11306e-64	3.75278e-63	RGJ91885.1	hypothetical protein DXD46_02140 [Phocaeicola vulgatus]	63.3858	up
FHJOOPKJ_03874	31.3333	3	3.02	0.226667	3.63953	6.8469e-14	1.87881e-13	WP_117700316.1	right-handed parallel beta-helix repeat-containing protein [Phocaeicola vulgatus]	13.1645	up
FHJOOPKJ_02076	255.333	25.6667	29.7367	2.33333	3.63111	1.31677e-88	1.64685e-87	WP_005852886.1	MULTISPECIES: RagB/SusD family nutrient uptake outer membrane protein [Bacteroidaceae]	87.8805	up	PUL31	susD
FHJOOPKJ_00239	30.6667	3	3.76667	0.3	3.61576	5.34482e-18	1.72697e-17	WP_005852958.1	MULTISPECIES: histidine ammonia-lyase [Phocaeicola]	17.2721	up
FHJOOPKJ_00221	43.6667	4.33333	11.1867	0.89	3.60412	8.54559e-21	3.0069e-20	WP_005845162.1	MULTISPECIES: signal peptidase I [Bacteroidaceae]	20.0683	up
FHJOOPKJ_00615	53	5.33333	5.59333	0.463333	3.59809	2.84831e-26	1.19014e-25	WP_011965345.1	RagB/SusD family nutrient uptake outer membrane protein [Phocaeicola vulgatus]	25.5454	up	PUL9	susD
FHJOOPKJ_00622	194	20	15.3967	1.25333	3.5915	2.58837e-74	2.66594e-73	WP_005849174.1	MULTISPECIES: RagB/SusD family nutrient uptake outer membrane protein [Bacteroidaceae]	73.587	up
FHJOOPKJ_00740	475.667	49.6667	46.9033	3.73	3.58584	4.93928e-149	1.10742e-147	ALK85571.1	Pyruvate carboxylase / Biotin carboxyl carrier protein [Phocaeicola vulgatus]	148.306	up
FHJOOPKJ_00903	3030.67	318	635.593	51.5133	3.57393	0	0	WP_005844402.1	MULTISPECIES: GDP-mannose 4,6-dehydratase [Bacteroidaceae]	400	up
FHJOOPKJ_00201	107.667	11.3333	9.05	0.753333	3.55841	1.25152e-32	6.18526e-32	WP_005845679.1	MULTISPECIES: glycoside hydrolase [Bacteroidaceae]	31.9026	up	PUL5	GH63
FHJOOPKJ_02163	98.3333	10.3333	5.41	0.453333	3.55718	3.66375e-33	1.83038e-32	WP_117699918.1	TonB-dependent receptor [Phocaeicola vulgatus]	32.4361	up	PUL32	susC
FHJOOPKJ_02528	1429	153.333	171.647	14.1567	3.54691	4.12721e-267	2.07887e-265	WP_012055757.1	glutamine synthetase family protein [Phocaeicola vulgatus]	266.384	up
FHJOOPKJ_03556	19.6667	2	32.3867	2.29333	3.54004	3.0594e-12	7.82841e-12	WP_011964839.1	MULTISPECIES: hypothetical protein [Phocaeicola]	11.5144	up
FHJOOPKJ_00606	1130.33	121.667	41.3567	3.47667	3.53573	5.0923e-263	2.53032e-261	WP_196026710.1	response regulator [Phocaeicola vulgatus]	262.293	up
FHJOOPKJ_02180	16.3333	1.66667	0.81	0.06	3.52538	5.07496e-09	1.10353e-08	WP_117699908.1	glycoside hydrolase family 127 protein [Phocaeicola vulgatus]	8.29457	up	PUL33	GH146
FHJOOPKJ_02834	448	48.6667	430.383	35.0233	3.52308	3.27622e-90	4.18287e-89	WP_005848561.1	hypothetical protein [Phocaeicola vulgatus]	89.4846	up
FHJOOPKJ_03655	1432	156.667	102.387	8.57667	3.51967	1.7198e-276	9.58136e-275	WP_052573214.1	MULTISPECIES: hypothetical protein [Bacteroides]	275.765	up	PUL50	Unk
FHJOOPKJ_00892	407.333	44.3333	47.4033	4.01333	3.51856	1.01898e-114	1.65056e-113	WP_117700185.1	arylsulfatase [Phocaeicola vulgatus]	113.992	up
FHJOOPKJ_01308	173	19	8.81333	0.743333	3.50058	1.25455e-62	1.12512e-61	WP_005850836.1	TonB-dependent receptor [Phocaeicola vulgatus]	61.9015	up	PUL20	susC
FHJOOPKJ_03774	130.333	14.3333	13.36	1.12333	3.50016	4.5248e-54	3.64063e-53	ALA73551.1	glycan metabolism protein RagB [Phocaeicola dorei]	53.3444	up	PUL51	susD
FHJOOPKJ_00222	37	4	17.0167	1.44333	3.49006	1.00448e-15	2.98582e-15	WP_016271346.1	MULTISPECIES: hypothetical protein [Bacteroidaceae]	14.9981	up
FHJOOPKJ_03453	814.333	90.3333	60.71	5.19333	3.48987	1.5379e-137	3.10706e-136	WP_117921358.1	DUF3987 domain-containing protein [Phocaeicola vulgatus]	136.813	up
FHJOOPKJ_00863	66.6667	7.33333	16.6433	1.39667	3.4867	2.22959e-27	9.64495e-27	WP_117720082.1	peptidase domain-containing ABC transporter [Phocaeicola vulgatus]	26.6518	up
FHJOOPKJ_03873	51.6667	5.66667	4.32667	0.373333	3.4818	1.17242e-23	4.51886e-23	WP_074783111.1	glycoside hydrolase family 127 protein [Phocaeicola vulgatus]	22.9309	up
FHJOOPKJ_00857	293.667	33	311.343	26.3133	3.47184	4.11814e-111	6.44357e-110	KAB5425532.1	DUF3244 domain-containing protein [Phocaeicola vulgatus]	110.385	up
FHJOOPKJ_01339	39.3333	4.33333	4.07	0.36	3.4555	1.50666e-19	5.09191e-19	WP_074783457.1	RagB/SusD family nutrient uptake outer membrane protein [Phocaeicola vulgatus]	18.822	up	PUL21	susD
FHJOOPKJ_03044	21.3333	2.33333	4.11333	0.343333	3.44468	6.21868e-13	1.64386e-12	WP_117700085.1	galactose mutarotase [Phocaeicola vulgatus]	12.2063	up	PUL42	Unk
FHJOOPKJ_02975	75.6667	8.66667	15.42	1.4	3.42333	1.88143e-33	9.46376e-33	WP_011965527.1	MULTISPECIES: glycoside hydrolase family 43 protein [Bacteroidaceae]	32.7255	up	PUL40	GH43_31
FHJOOPKJ_00182	48.6667	5.66667	174.16	14.7233	3.39545	1.85232e-24	7.26892e-24	WP_005845647.1	MULTISPECIES: hypothetical protein [Phocaeicola]	23.7323	up
FHJOOPKJ_03660	3567.67	426	264.577	24.51	3.38787	0	0	MBR5351933.1	GH92 family glycosyl hydrolase [Prevotella sp.]	400	up	PUL50	GH92
FHJOOPKJ_01790	881.667	105.667	108.48	10.07	3.38228	1.22757e-187	3.85794e-186	WP_117693790.1	rhamnulokinase [Phocaeicola vulgatus]	186.911	up
FHJOOPKJ_01264	61.3333	7.33333	3.23	0.286667	3.36754	1.09066e-31	5.25602e-31	WP_016271132.1	MULTISPECIES: TonB-dependent receptor [Bacteroidaceae]	30.9623	up	PUL18	susC
FHJOOPKJ_00632	58.6667	7	11.58	1.07667	3.36725	5.30161e-26	2.18788e-25	WP_005842806.1	MULTISPECIES: glycoside hydrolase family 43 protein [Bacteroidaceae]	25.2756	up	PUL10	GH43_18
FHJOOPKJ_01263	25.6667	3	3.03	0.276667	3.35849	1.23982e-13	3.37191e-13	WP_005838880.1	MULTISPECIES: RagB/SusD family nutrient uptake outer membrane protein [Bacteroidaceae]	12.9066	up	PUL18	susD
FHJOOPKJ_02833	1573	193	756.133	70.7633	3.34631	2.92189e-224	1.1678e-222	WP_005846226.1	MULTISPECIES: RNA polymerase sigma factor [Bacteroidaceae]	223.534	up
FHJOOPKJ_01615	140.333	17.3333	14.8033	1.42333	3.33067	9.03112e-63	8.17917e-62	WP_011965414.1	MULTISPECIES: RagB/SusD family nutrient uptake outer membrane protein [Phocaeicola]	62.0443	up	PUL22	susD
FHJOOPKJ_02701	166.667	20.6667	56.6533	5.28	3.33042	4.39608e-57	3.69895e-56	WP_118327685.1	hypothetical protein [Phocaeicola vulgatus]	56.3569	up
FHJOOPKJ_02989	1641	204.333	372.267	36	3.32396	2.48184e-214	9.40797e-213	WP_074783206.1	arginine deiminase-related protein [Phocaeicola vulgatus]	213.605	up
FHJOOPKJ_01782	3959.67	496.667	213.863	20.78	3.31979	0	0	WP_118236367.1	DUF4981 domain-containing protein [Phocaeicola vulgatus]	400	up	PUL26	GH2
FHJOOPKJ_00041	66.6667	8.33333	8.44	0.81	3.30458	2.56604e-29	1.15913e-28	WP_016270834.1	glycosyl hydrolase family 28 protein [Phocaeicola vulgatus]	28.5907	up	PUL2	GH28
FHJOOPKJ_00093	88	11.3333	9.25667	0.926667	3.27121	5.30908e-32	2.58221e-31	BDC04271.1	starch-binding protein [Phocaeicola vulgatus]	31.275	up	PUL4	susD
FHJOOPKJ_03178	334.333	43.3333	59.1167	5.95	3.26687	5.94703e-112	9.34497e-111	WP_005839092.1	MULTISPECIES: heparan-alpha-glucosaminide N-acetyltransferase domain-containing protein [Bacteroidaceae]	111.226	up
FHJOOPKJ_01789	1633	213.333	244.75	24.67	3.26147	5.87499e-219	2.32283e-217	WP_085930143.1	MULTISPECIES: L-rhamnose isomerase [Bacteroidaceae]	218.231	up
FHJOOPKJ_04052	137.667	18	22.4533	2.29333	3.25081	6.79239e-38	3.81307e-37	WP_110506604.1	MULTISPECIES: DUF4974 domain-containing protein [Bacteroidaceae]	37.168	up
FHJOOPKJ_00069	92.3333	12	117.85	11.9367	3.2393	9.07781e-29	4.05086e-28	WP_005853508.1	MULTISPECIES: L-rhamnose mutarotase [Bacteroidaceae]	28.042	up
FHJOOPKJ_01689	2685.33	355.667	448.48	46.1767	3.23356	2.09943e-254	1.01574e-252	WP_007841766.1	MULTISPECIES: lactaldehyde reductase [Bacteroidaceae]	253.678	up
FHJOOPKJ_01317	1146.33	152.333	190	19.62	3.23229	5.87079e-193	1.91034e-191	WP_057249932.1	ATPase [Phocaeicola vulgatus]	192.231	up
FHJOOPKJ_02990	2503.67	334	382.387	39.2467	3.23196	0	0	WP_119064181.1	ornithine--oxo-acid transaminase [Phocaeicola vulgatus]	400	up
FHJOOPKJ_00235	43.3333	5.66667	9.90333	0.98	3.22844	1.88312e-22	7.03682e-22	MBT0708958.1	Glutamate formimidoyltransferase [Phocaeicola vulgatus]	21.7251	up
FHJOOPKJ_03057	518.333	69.6667	39.5467	4.08333	3.21847	3.23976e-119	5.56664e-118	WP_117700041.1	S9 family peptidase [Phocaeicola vulgatus]	118.489	up
FHJOOPKJ_00223	309.667	41.6667	56.4	5.90333	3.2111	4.98451e-102	7.27303e-101	WP_032952683.1	hypothetical protein [Phocaeicola vulgatus]	101.302	up
FHJOOPKJ_03045	190	25.6667	10.6933	1.09333	3.21013	7.31528e-69	7.21134e-68	WP_172770257.1	discoidin domain-containing protein [Phocaeicola vulgatus]	68.1358	up	PUL42	CBM32
FHJOOPKJ_01310	594.667	80.6667	65.4033	6.82	3.20763	7.8181e-161	1.94238e-159	EET15509.2	arylsulfatase [Bacteroides sp. 4_3_47FAA]	160.107	up	PUL20	Unk
FHJOOPKJ_00070	274.667	37.3333	35.55	3.68667	3.20301	1.72656e-88	2.15205e-87	WP_005841927.1	MULTISPECIES: glycoside hydrolase family 88 protein [Bacteroidaceae]	87.7628	up	PUL3	GH105
FHJOOPKJ_01706	5453	743	369.953	39.24	3.19896	0	0	WP_118171211.1	FAD-dependent oxidoreductase [Phocaeicola vulgatus]	400	up
FHJOOPKJ_00190	291.667	39.6667	34.7933	3.68333	3.19809	1.99246e-80	2.21338e-79	WP_117699649.1	radical SAM protein [Phocaeicola vulgatus]	79.7006	up
FHJOOPKJ_04151	78.3333	10.6667	63.14	6.25333	3.1978	1.44461e-20	5.0397e-20	WP_129640655.1	D-Ala-D-Ala carboxypeptidase family metallohydrolase [Phocaeicola dorei]	19.8402	up
FHJOOPKJ_03169	68.3333	9.33333	8.35667	0.886667	3.17824	2.87637e-34	1.48545e-33	WP_117720648.1	hypothetical protein [Phocaeicola vulgatus]	33.5412	up
FHJOOPKJ_03948	385.333	53	137.977	14.6767	3.17732	2.01396e-96	2.73259e-95	ALK84287.1	hypothetical protein BvMPK_1682 [Phocaeicola vulgatus]	95.6959	up
FHJOOPKJ_01798	68	9.33333	8.33333	0.886667	3.17242	1.44315e-31	6.93656e-31	WP_117814892.1	glycoside hydrolase [Phocaeicola vulgatus]	30.8407	up	PUL27	GH30_6
FHJOOPKJ_03170	51	7	8.12667	0.836667	3.16937	2.35242e-18	7.68875e-18	WP_008668046.1	MULTISPECIES: dicarboxylate/amino acid:cation symporter [Bacteroidaceae]	17.6285	up
FHJOOPKJ_03942	125.333	17.3333	9.01	0.976667	3.16597	4.75863e-45	3.22238e-44	WP_117815183.1	family 78 glycoside hydrolase catalytic domain [Phocaeicola vulgatus]	44.3225	up	PUL53	CBM67
FHJOOPKJ_03659	1840	257.333	229.49	24.7667	3.16242	1.98566e-291	1.14083e-289	WP_229105812.1	glycoside hydrolase family 88 protein [Bacteroides nordii]	290.702	up	PUL50	GH105
FHJOOPKJ_04210	59.6667	8.33333	6.16	0.666667	3.1522	4.90566e-21	1.74113e-20	WP_087336726.1	MULTISPECIES: RagB/SusD family nutrient uptake outer membrane protein [Phocaeicola]	20.3093	up
FHJOOPKJ_00189	97	13.6667	297.56	30.1233	3.1472	3.43654e-37	1.89732e-36	WP_032946032.1	MULTISPECIES: hypothetical protein [Phocaeicola]	36.4639	up
FHJOOPKJ_04018	578.667	82	81.6233	9.05667	3.13568	1.92258e-116	3.19879e-115	WP_008668332.1	MULTISPECIES: tripeptidyl aminopeptidase [Bacteroidaceae]	115.716	up
FHJOOPKJ_01970	1328.67	188.667	193.233	21.4467	3.13384	6.51841e-205	2.34982e-203	WP_005838662.1	MULTISPECIES: phenylacetate--CoA ligase [Bacteroidaceae]	204.186	up
FHJOOPKJ_03661	4542.33	648.667	458.607	50.7367	3.13088	0	0	WP_195570518.1	hypothetical protein [Bacteroides nordii]	400	up
FHJOOPKJ_00071	503	71.6667	45.6933	5.09	3.12668	6.89811e-103	1.01865e-101	WP_117695250.1	rhamnogalacturonan lyase [Phocaeicola vulgatus]	102.161	up	PUL3	PL11_1
FHJOOPKJ_04152	270.667	38.6667	231.503	25.1167	3.12295	2.4929e-87	3.02521e-86	WP_139008172.1	hypothetical protein [Phocaeicola dorei]	86.6033	up
FHJOOPKJ_00094	94.6667	13.6667	5.61	0.626667	3.10859	1.218e-34	6.36164e-34	WP_118171226.1	SusC/RagA family TonB-linked outer membrane protein [Phocaeicola vulgatus]	33.9144	up	PUL4	susC
FHJOOPKJ_02086	19	2.66667	31.8733	3.06333	3.1084	1.59013e-09	3.55218e-09	WP_117694678.1	LysO family transporter [Phocaeicola vulgatus]	8.79857	up
FHJOOPKJ_02723	1125	163	203.397	22.9133	3.1029	6.43816e-193	2.07659e-191	WP_117853946.1	hypothetical protein [Phocaeicola vulgatus]	192.191	up
FHJOOPKJ_03831	44.3333	6.33333	9.65667	1.08333	3.10236	6.26298e-20	2.13429e-19	EET15428.2	amidohydrolase family protein [Bacteroides sp. 4_3_47FAA]	19.2032	up
FHJOOPKJ_02177	57.6667	8.33333	99.27	10.71	3.09131	1.80502e-26	7.59388e-26	WP_005849984.1	MULTISPECIES: DUF4884 domain-containing protein [Bacteroidaceae]	25.7435	up
FHJOOPKJ_03356	363	53.3333	19.88	2.28333	3.08709	1.20425e-101	1.74332e-100	WP_008670182.1	MULTISPECIES: TonB-dependent receptor [Bacteroidaceae]	100.919	up	PUL48	susC
FHJOOPKJ_00238	14.3333	2	5.43667	0.596667	3.07269	6.03156e-08	1.23969e-07	WP_005840658.1	MULTISPECIES: cyclodeaminase/cyclohydrolase family protein [Bacteroidaceae]	7.21957	up
FHJOOPKJ_01341	101	15	17.0633	1.96	3.06387	6.71672e-44	4.41024e-43	WP_011964781.1	glycoside hydrolase family 43 protein [Phocaeicola vulgatus]	43.1728	up	PUL21	GH43_24
FHJOOPKJ_03168	23	3.33333	10.6467	1.16	3.06347	6.58497e-12	1.65728e-11	WP_016270018.1	hypothetical protein [Phocaeicola vulgatus]	11.1814	up
FHJOOPKJ_01871	70	10.3333	5.28	0.623333	3.06306	4.98779e-29	2.23933e-28	WP_172770171.1	alpha-N-acetylglucosaminidase [Phocaeicola vulgatus]	28.3021	up	PUL30	GH89
FHJOOPKJ_03056	373.667	56.3333	26.6867	3.14667	3.04853	9.59144e-116	1.58151e-114	WP_117700045.1	glycoside hydrolase family 127 protein [Phocaeicola vulgatus]	115.018	up
FHJOOPKJ_00042	222.333	33.6667	18.9667	2.21333	3.04707	1.08819e-58	9.41474e-58	WP_008670288.1	MULTISPECIES: RagB/SusD family nutrient uptake outer membrane protein [Bacteroidaceae]	57.9633	up	PUL2	susD
FHJOOPKJ_01012	407.333	61.3333	43.7067	5.18667	3.04612	6.46811e-93	8.49402e-92	WP_008667747.1	MULTISPECIES: glycoside hydrolase 43 family protein [Bacteroidaceae]	92.1892	up	PUL15	GH43_10
FHJOOPKJ_00628	416	63	50.7167	5.94333	3.04523	6.7458e-88	8.29575e-87	ALK82871.1	Hexuronate transporter [Phocaeicola vulgatus]	87.171	up
FHJOOPKJ_00727	811	122.667	284.377	33.0367	3.0443	9.96396e-178	2.931e-176	WP_117678228.1	fructose-6-phosphate aldolase [Phocaeicola vulgatus]	177.002	up
FHJOOPKJ_04209	16	2.33333	3.70667	0.413333	3.03643	2.86612e-08	5.98111e-08	EEZ23095.1	TonB-linked outer membrane protein, SusC/RagA family [Bacteroides sp. 3_1_33FAA]	7.54271	up
FHJOOPKJ_02988	673.333	102	146.63	17.3633	3.0351	1.13673e-107	1.7562e-106	ALK84368.1	NG,NG-dimethylarginine dimethylaminohydrolase 1 [Phocaeicola vulgatus]	106.944	up
FHJOOPKJ_03940	112.667	17.6667	14.4233	1.66333	3.018	4.66127e-22	1.71395e-21	WP_117815181.1	endonuclease/exonuclease/phosphatase family protein [Phocaeicola vulgatus]	21.3315	up
FHJOOPKJ_00191	111.333	17.6667	48.29	5.62667	2.98743	3.72296e-26	1.54507e-25	WP_005845663.1	MULTISPECIES: cysteine peptidase family C39 domain-containing protein [Bacteroidaceae]	25.4291	up
FHJOOPKJ_01775	1718.33	270.667	149.353	18.3767	2.98437	1.55589e-237	6.89277e-236	WP_032946116.1	glycoside hydrolase family 97 protein [Phocaeicola vulgatus]	236.808	up	PUL26	GH97
FHJOOPKJ_03051	547	86.6667	43.34	5.27333	2.98429	5.45825e-130	1.02923e-128	WP_005850672.1	alpha-galactosidase [Phocaeicola vulgatus]	129.263	up	PUL42	GH36
FHJOOPKJ_01004	6469	1020.67	607.023	74.5933	2.98242	0	0	WP_005848952.1	oxaloacetate decarboxylase [Phocaeicola vulgatus]	400	up
FHJOOPKJ_00860	326	51.6667	38.8133	4.79	2.978	1.99532e-94	2.65825e-93	WP_117699478.1	cysteine peptidase family C39 domain-containing protein [Phocaeicola vulgatus]	93.7	up
FHJOOPKJ_01005	5062.67	800.333	765.163	94.1567	2.97693	2.96439387504748e-323	1.87744945419674e-321	WP_005845893.1	MULTISPECIES: sodium ion-translocating decarboxylase subunit beta [Bacteroidaceae]	400	up
FHJOOPKJ_03055	151.333	24	10.6633	1.33667	2.9679	4.99843e-51	3.82294e-50	WP_117700042.1	family 43 glycosylhydrolase [Phocaeicola vulgatus]	50.3012	up
FHJOOPKJ_01224	133	21.3333	18.6433	2.31667	2.96129	2.11206e-42	1.35062e-41	WP_117699789.1	HAMP domain-containing histidine kinase [Phocaeicola vulgatus]	41.6753	up
FHJOOPKJ_02713	1387.33	223.333	307.747	38.3267	2.95677	1.03342e-196	3.48614e-195	WP_005839718.1	MULTISPECIES: dihydrodipicolinate synthase family protein [Bacteroidaceae]	195.986	up
FHJOOPKJ_00102	166.333	27	24.1167	3.05667	2.9401	4.2296e-51	3.25361e-50	WP_117696234.1	acetylxylan esterase [Phocaeicola vulgatus]	50.3737	up	PUL4	CE15
FHJOOPKJ_02725	17	2.66667	38.7067	4.23333	2.93914	2.63519e-09	5.83359e-09	WP_038609469.1	MULTISPECIES: hypothetical protein [Bacteroidaceae]	8.57919	up
FHJOOPKJ_03591	242	39.6667	13.6533	1.73667	2.92921	1.2494e-73	1.27968e-72	WP_011203621.1	TonB-dependent receptor [Bacteroides fragilis]	72.9033	up	PUL49	susC
FHJOOPKJ_00186	65	10.6667	148.517	17.6733	2.9214	1.82002e-21	6.54174e-21	WP_016271325.1	MULTISPECIES: hypothetical protein [Phocaeicola]	20.7399	up
FHJOOPKJ_01882	3249.67	537	376.59	48.1067	2.9207	0	0	ABR40630.1	putative aminopeptidase [Phocaeicola vulgatus ATCC 8482]	400	up
FHJOOPKJ_00089	31	5	4.24667	0.52	2.91872	1.16051e-09	2.6163e-09	WP_005853530.1	PD40 domain-containing protein [Phocaeicola vulgatus]	8.93535	up
FHJOOPKJ_02689	553	91	47.2567	6.09	2.91757	3.48037e-107	5.33222e-106	WP_216952322.1	family 20 glycosylhydrolase [Phocaeicola vulgatus]	106.458	up
FHJOOPKJ_00617	26.6667	4.33333	6.10667	0.79	2.90393	3.65763e-13	9.73868e-13	WP_011965343.1	FecR family protein [Phocaeicola vulgatus]	12.4368	up	PUL9	Unk
FHJOOPKJ_01306	842	143.333	112.79	14.86	2.87712	3.40083e-173	9.54569e-172	WP_032953098.1	GDSL-type esterase/lipase family protein [Phocaeicola vulgatus]	172.468	up
FHJOOPKJ_01311	641.667	110	47.2533	6.26333	2.87003	7.99526e-138	1.62423e-136	WP_172770328.1	glycoside hydrolase family 20 protein [Phocaeicola vulgatus]	137.097	up	PUL20	GH20
FHJOOPKJ_00653	18	3	2.57667	0.326667	2.8559	6.57367e-09	1.42185e-08	WP_117695918.1	glycosyl hydrolase family 28 protein [Phocaeicola vulgatus]	8.18219	up	PUL11	GH28
FHJOOPKJ_02722	370	64.6667	147.153	19.07	2.8494	9.90877e-81	1.10743e-79	WP_117853947.1	hypothetical protein [Phocaeicola vulgatus]	80.004	up
FHJOOPKJ_00091	31.3333	5.33333	3.74667	0.493333	2.84745	2.14238e-15	6.24706e-15	WP_005842402.1	DUF4990 domain-containing protein [Phocaeicola vulgatus]	14.6691	up
FHJOOPKJ_00199	80.6667	14	7.71333	1.01333	2.84356	6.08341e-28	2.66611e-27	WP_005845675.1	MULTISPECIES: RagB/SusD family nutrient uptake outer membrane protein [Phocaeicola]	27.2159	up	PUL5	susD
FHJOOPKJ_00614	136.333	23.6667	7.43667	1.01333	2.84241	7.64653e-52	5.96949e-51	WP_057279511.1	beta-glycosidase [Phocaeicola vulgatus]	51.1165	up	PUL9	GH2
FHJOOPKJ_01242	1292	225.333	456.557	61.31	2.84015	8.15657e-160	1.98621e-158	WP_117699795.1	hypothetical protein [Phocaeicola vulgatus]	159.088	up
FHJOOPKJ_02699	93.6667	16.3333	33.1467	4.29333	2.83987	1.79412e-33	9.03698e-33	WP_005840406.1	MULTISPECIES: ATP-binding cassette domain-containing protein [Bacteroidaceae]	32.7461	up
FHJOOPKJ_01863	32.3333	5.66667	3.32667	0.416667	2.82362	6.49824e-13	1.71653e-12	WP_227235789.1	histidine phosphatase family protein [Phocaeicola dorei]	12.1872	up	PUL30	Unk
FHJOOPKJ_04150	60.6667	10.6667	29.82	3.97	2.81769	9.23914e-22	3.35695e-21	WP_117697820.1	MULTISPECIES: hypothetical protein [Phocaeicola]	21.0344	up
FHJOOPKJ_01268	1675.67	296.667	169.697	23.38	2.81739	4.24885e-151	9.64384e-150	ALK84227.1	L-fucose isomerase [Phocaeicola vulgatus]	150.372	up
FHJOOPKJ_01687	28.3333	5	7.9	1.04667	2.79816	5.36145e-13	1.42032e-12	WP_117699816.1	glycerophosphodiester phosphodiesterase [Phocaeicola vulgatus]	12.2707	up
FHJOOPKJ_03832	79.3333	14.3333	17.02	2.32	2.78346	6.66799e-29	2.98275e-28	ALK86480.1	putative oxidoreductase [Phocaeicola vulgatus]	28.176	up
FHJOOPKJ_00095	79.3333	14.3333	6.93333	0.966667	2.78272	8.45302e-33	4.20024e-32	WP_118171225.1	RagB/SusD family nutrient uptake outer membrane protein [Phocaeicola vulgatus]	32.073	up	PUL4	susD
FHJOOPKJ_03054	144	26	8.81	1.25	2.77711	4.20462e-36	2.27025e-35	WP_117700043.1	glycoside hydrolase family 97 catalytic domain-containing protein [Phocaeicola vulgatus]	35.3763	up
FHJOOPKJ_01608	926	168.333	152.92	21.7533	2.77708	3.63439e-103	5.41039e-102	WP_117884995.1	TolC family protein [Phocaeicola vulgatus]	102.44	up
FHJOOPKJ_00203	179.333	32.6667	8.43	1.2	2.77379	1.59578e-45	1.09065e-44	SEK81319.1	TonB-linked outer membrane protein, SusC/RagA family [Phocaeicola vulgatus]	44.797	up	PUL5	susC
FHJOOPKJ_01014	367.333	67.6667	40.3133	5.83667	2.75654	3.8859e-88	4.79478e-87	WP_005845902.1	glycoside hydrolase family 28 protein [Phocaeicola vulgatus]	87.4105	up	PUL15	GH28
FHJOOPKJ_01305	813	152	33.5467	4.87667	2.74058	1.96135e-162	5.00825e-161	WP_117678283.1	response regulator [Phocaeicola vulgatus]	161.707	up
FHJOOPKJ_00652	92	17	5.23667	0.776667	2.73328	1.74943e-24	6.87985e-24	WP_181979947.1	DUF4981 domain-containing protein [Phocaeicola vulgatus]	23.7571	up	PUL11	GH2
FHJOOPKJ_02976	96.6667	18.3333	18.89	2.67	2.72607	1.07419e-22	4.02629e-22	WP_005846020.1	family 43 glycosylhydrolase [Phocaeicola vulgatus]	21.9689	up	PUL40	GH43_3
FHJOOPKJ_02724	574.667	109	96.5967	14.1467	2.71923	4.75063e-99	6.64186e-98	WP_051926261.1	MULTISPECIES: ATP-dependent Clp protease proteolytic subunit [Bacteroidaceae]	98.3232	up
FHJOOPKJ_00316	166.333	31.6667	20.82	3.06333	2.70827	1.06935e-45	7.39099e-45	WP_005851375.1	MULTISPECIES: D-xylose transporter XylE [Bacteroidaceae]	44.9709	up
FHJOOPKJ_00103	149.333	28.6667	10.91	1.66	2.69452	2.82492e-46	1.97852e-45	WP_117696235.1	DUF4982 domain-containing protein [Phocaeicola vulgatus]	45.549	up	PUL4	GH2
FHJOOPKJ_04189	508	99	308.35	45.49	2.68339	9.43392e-101	1.35502e-99	WP_005846488.1	MULTISPECIES: anaerobic ribonucleoside-triphosphate reductase activating protein [Bacteroidaceae]	100.025	up
FHJOOPKJ_00902	633.667	124	115.963	17.5433	2.67471	5.52561e-92	7.20485e-91	WP_005844400.1	MULTISPECIES: sugar kinase [Bacteroidaceae]	91.2576	up
FHJOOPKJ_01609	2985.67	587	161.457	24.6867	2.66976	1.27071e-291	7.41654e-290	WP_117884997.1	efflux RND transporter permease subunit [Phocaeicola vulgatus]	290.896	up
FHJOOPKJ_02720	387.667	76.3333	61.4	9.30333	2.66666	1.16344e-96	1.58443e-95	WP_057099155.1	hypothetical protein [Phocaeicola vulgatus]	95.9343	up
FHJOOPKJ_03596	242.667	48.6667	27.3767	4.16333	2.65248	1.10712e-46	7.84367e-46	EYA27461.1	putative outer membrane protein [Bacteroides fragilis str. 1009-4-F #10]	45.9558	up	PUL49	susD
FHJOOPKJ_03939	79.3333	15.6667	9.26	1.44333	2.65185	7.6838e-30	3.4967e-29	WP_117815180.1	DUF4091 domain-containing protein [Phocaeicola vulgatus]	29.1144	up
FHJOOPKJ_03036	54	10.6667	3.80333	0.576667	2.65002	4.53318e-19	1.50983e-18	ALK83143.1	glycoside hydrolase family protein [Phocaeicola vulgatus]	18.3436	up	PUL42	GH95
FHJOOPKJ_01177	716.333	143	311.447	47.2433	2.64694	3.9571e-134	7.73949e-133	WP_005843827.1	MULTISPECIES: XRE family transcriptional regulator [Bacteroidaceae]	133.403	up
FHJOOPKJ_03597	473.333	95	24.01	3.69333	2.64529	3.59294e-88	4.44823e-87	WP_005811459.1	TonB-dependent receptor [Bacteroides fragilis]	87.4445	up	PUL49	susC
FHJOOPKJ_00096	133.667	26.6667	7.00667	1.1	2.64213	6.49284e-44	4.27087e-43	WP_057280453.1	MULTISPECIES: TonB-dependent receptor [Bacteroidaceae]	43.1876	up	PUL4	susC
FHJOOPKJ_02712	999	201.333	157.447	24.53	2.63378	2.80446e-176	8.05624e-175	WP_005839715.1	MULTISPECIES: AGE family epimerase/isomerase [Bacteroidaceae]	175.552	up
FHJOOPKJ_00043	309.333	62.3333	15.3	2.41333	2.63195	2.18705e-85	2.60251e-84	WP_005843090.1	MULTISPECIES: TonB-dependent receptor [Bacteroidaceae]	84.6601	up	PUL2	susC
FHJOOPKJ_00086	555.667	112	30.5033	4.77667	2.63078	2.37197e-109	3.69565e-108	WP_117699975.1	DUF4982 domain-containing protein [Phocaeicola vulgatus]	108.625	up
FHJOOPKJ_01212	242.333	49	12.86	2.01333	2.6292	2.26988e-61	2.01602e-60	WP_117700258.1	TonB-dependent receptor [Phocaeicola vulgatus]	60.644	up	PUL16	susC
FHJOOPKJ_02719	150.333	30.3333	79.02	12.29	2.62361	9.86097e-48	7.17996e-47	WP_087338288.1	MULTISPECIES: hypothetical protein [Bacteroidaceae]	47.0061	up
FHJOOPKJ_00858	18.6667	3.66667	36.19	5.41333	2.62337	1.14472e-06	2.18997e-06	WP_032952973.1	MULTISPECIES: hypothetical protein [Bacteroidaceae]	5.9413	up
FHJOOPKJ_03590	145.667	29.6667	16.6067	2.55667	2.62265	3.28485e-40	1.9576e-39	WP_011203622.1	MULTISPECIES: RagB/SusD family nutrient uptake outer membrane protein [Bacteroidaceae]	39.4835	up	PUL49	susD
FHJOOPKJ_01854	301	61.3333	12.6933	2.00667	2.61793	2.08834e-81	2.34827e-80	WP_038611882.1	MULTISPECIES: ATP-binding protein [Bacteroidaceae]	80.6802	up	PUL30	Unk
FHJOOPKJ_03037	12	2.33333	1.6	0.25	2.61464	4.76413e-06	8.77641e-06	NMW41572.1	sugar porter family MFS transporter [Phocaeicola vulgatus]	5.32202	up	PUL42	Unk
FHJOOPKJ_00236	20.3333	4	17.5633	2.82333	2.61043	1.17027e-07	2.36173e-07	WP_005852962.1	MULTISPECIES: GxxExxY protein [Bacteroidaceae]	6.93172	up
FHJOOPKJ_01891	1884	385.667	218.477	34.73	2.60923	3.08011e-216	1.20485e-214	WP_032943217.1	MULTISPECIES: arylsulfatase [Bacteroidaceae]	215.511	up
FHJOOPKJ_02609	1915.67	391.333	178.27	28.5367	2.60868	1.90387e-204	6.79663e-203	WP_117700435.1	alpha-L-fucosidase [Phocaeicola vulgatus]	203.72	up
FHJOOPKJ_03075	993.333	204	262.837	41.7867	2.60538	4.18015e-166	1.09789e-164	WP_005844136.1	MULTISPECIES: gluconate 5-dehydrogenase [Bacteroidaceae]	165.379	up
FHJOOPKJ_04092	3758.67	771	221.403	35.4833	2.60376	4.52473e-204	1.59975e-202	WP_016270468.1	aminomethyl-transferring glycine dehydrogenase [Phocaeicola vulgatus]	203.344	up
FHJOOPKJ_03569	7	1.33333	0.866667	0.13	2.59728	0.000284521	0.00046914	WP_005842256.1	TolC family protein [Phocaeicola vulgatus]	3.54589	up
FHJOOPKJ_00198	206.333	43	11.0767	1.80333	2.58411	3.45154e-41	2.12585e-40	WP_005845673.1	MULTISPECIES: TonB-dependent receptor [Bacteroidaceae]	40.462	up	PUL5	susC
FHJOOPKJ_04205	2341.67	490	236.24	38.1867	2.58254	9.5562e-268	4.8803e-266	WP_117720674.1	DUF6067 family protein [Phocaeicola vulgatus]	267.02	up
FHJOOPKJ_02977	264	55.3333	22.3667	3.60333	2.58078	1.22682e-65	1.13915e-64	WP_005846023.1	MULTISPECIES: hypothetical protein [Bacteroidaceae]	64.9112	up
FHJOOPKJ_00867	354	74	92.5233	15.0033	2.57952	1.76426e-84	2.08592e-83	WP_117699481.1	GLPGLI family protein [Phocaeicola vulgatus]	83.7534	up
FHJOOPKJ_02069	353	73.6667	29.7067	4.86667	2.5792	3.58361e-88	4.44823e-87	WP_118410062.1	PQQ-binding-like beta-propeller repeat protein [Phocaeicola vulgatus]	87.4457	up
FHJOOPKJ_00072	103.333	21.6667	13.6633	2.21	2.57386	2.69962e-28	1.19309e-27	WP_016275514.1	MULTISPECIES: glycoside hydrolase family 28 protein [Phocaeicola]	27.5687	up	PUL3	GH28
FHJOOPKJ_01127	454.333	96	51.2933	8.44333	2.56346	3.12939e-76	3.29707e-75	WP_008671064.1	MULTISPECIES: FGGY-family carbohydrate kinase [Bacteroidaceae]	75.5045	up
FHJOOPKJ_01610	1631	344.333	242.613	39.8633	2.56293	2.51985e-209	9.35906e-208	WP_005842605.1	MULTISPECIES: efflux RND transporter periplasmic adaptor subunit [Bacteroidaceae]	208.599	up
FHJOOPKJ_03294	9475	2010.67	1093.63	180.857	2.55271	1.16186e-146	2.51304e-145	WP_117699993.1	RagB/SusD family nutrient uptake outer membrane protein [Phocaeicola vulgatus]	145.935	up	PUL45	susD
FHJOOPKJ_01897	127	27	16.67	2.73333	2.55265	3.50767e-41	2.15681e-40	RHK78558.1	energy transducer TonB [Phocaeicola vulgatus]	40.455	up
FHJOOPKJ_00101	218.667	46.6667	21.4767	3.57	2.54742	1.01703e-65	9.46736e-65	WP_117696233.1	family 78 glycoside hydrolase catalytic domain [Phocaeicola vulgatus]	64.9927	up	PUL4	GH78
FHJOOPKJ_03951	829	177	483.143	79.6467	2.54105	5.37165e-113	8.58764e-112	WP_005838762.1	MULTISPECIES: thioredoxin [Bacteroidaceae]	112.27	up
FHJOOPKJ_00993	1168	252	329.973	54.96	2.53248	1.39369e-160	3.41641e-159	WP_008667760.1	MULTISPECIES: DUF1295 domain-containing protein [Bacteroidaceae]	159.856	up
FHJOOPKJ_00692	946	206.667	169.87	28.4767	2.53212	2.81758e-61	2.49644e-60	WP_016271230.1	universal stress protein [Phocaeicola vulgatus]	60.5501	up
FHJOOPKJ_02836	1323.67	290.667	483.93	80.5233	2.51721	1.35126e-155	3.18499e-154	WP_057280483.1	hypothetical protein [Phocaeicola vulgatus]	154.869	up
FHJOOPKJ_00117	2107	460	423.647	71.8467	2.51326	1.53195e-210	5.74795e-209	WP_008670369.1	MULTISPECIES: isoaspartyl peptidase/L-asparaginase [Bacteroidaceae]	209.815	up
FHJOOPKJ_01346	223	49	15.1967	2.62333	2.49901	4.63834e-45	3.14671e-44	WP_118236270.1	carbohydrate binding domain-containing protein [Phocaeicola vulgatus]	44.3336	up
FHJOOPKJ_01003	460.667	101.667	906.133	149.14	2.4965	2.12728e-85	2.54789e-84	WP_005845891.1	MULTISPECIES: OadG family protein [Bacteroidaceae]	84.6722	up
FHJOOPKJ_03941	84.3333	18.6667	9.20667	1.58333	2.48927	1.15435e-26	4.8844e-26	WP_050484649.1	beta-N-acetylhexosaminidase [Phocaeicola vulgatus]	25.9377	up	PUL53	GH20
FHJOOPKJ_03041	171	38	14.5267	2.52667	2.48778	8.83594e-41	5.37021e-40	WP_117700087.1	alpha-galactosidase [Phocaeicola vulgatus]	40.0537	up	PUL42	Unk
FHJOOPKJ_00612	174	39	12.2833	2.12667	2.47636	1.9303e-51	1.50058e-50	WP_011965348.1	DUF4968 domain-containing protein [Phocaeicola vulgatus]	50.7144	up	PUL9	GH31
FHJOOPKJ_03295	18978.7	4240.33	1017.24	178.13	2.47494	9.73524e-126	1.78982e-124	WP_117699994.1	TonB-dependent receptor [Phocaeicola vulgatus]	125.012	up	PUL45	susC
FHJOOPKJ_02721	193.667	43.6667	82.22	14.1533	2.47381	1.16027e-42	7.43259e-42	RGT87042.1	hypothetical protein DWX04_20395 [Phocaeicola vulgatus]	41.9354	up
FHJOOPKJ_00864	12.3333	2.66667	1.72	0.283333	2.47125	5.65314e-06	1.03519e-05	WP_117720082.1	peptidase domain-containing ABC transporter [Phocaeicola vulgatus]	5.24771	up
FHJOOPKJ_02138	251	57.6667	115.543	20.0767	2.44888	1.55783e-48	1.14334e-47	WP_005846505.1	MULTISPECIES: hypothetical protein [Bacteroidaceae]	47.8075	up
FHJOOPKJ_01695	4026.67	924.333	550.5	98.39	2.43917	3.95928e-141	8.36682e-140	WP_005841771.1	MULTISPECIES: TrpB-like pyridoxal phosphate-dependent enzyme [Bacteroidaceae]	140.402	up
FHJOOPKJ_00639	230.333	53.3333	49.19	8.74667	2.43372	1.40999e-34	7.33314e-34	WP_135950279.1	FecR domain-containing protein [Phocaeicola sartorii]	33.8508	up
FHJOOPKJ_04186	41	9.33333	7.40667	1.31333	2.42989	0.00022307	0.000370641	KDS53776.1	acetyl-CoA carboxylase, biotin carboxylase subunit [Phocaeicola vulgatus str. 3975 RP4]	3.65156	up
FHJOOPKJ_03015	230.333	53	11.9467	2.17667	2.4291	4.34401e-45	2.95248e-44	WP_016270943.1	DUF4450 domain-containing protein [Phocaeicola vulgatus]	44.3621	up
FHJOOPKJ_01089	1098.33	256.667	828.773	147.477	2.41491	4.31059e-120	7.51187e-119	WP_005846121.1	MULTISPECIES: hypothetical protein [Bacteroidaceae]	119.365	up
FHJOOPKJ_00058	344.333	82	298.417	52.8467	2.39583	1.89943e-75	1.99549e-74	WP_005853490.1	MULTISPECIES: hypothetical protein [Bacteroidaceae]	74.7214	up
FHJOOPKJ_00650	261.667	63	84.9267	15.37	2.38517	1.23809e-53	9.85384e-53	WP_117695921.1	SGNH/GDSL hydrolase family protein [Phocaeicola vulgatus]	52.9072	up	PUL11	Unk
FHJOOPKJ_00619	15.6667	3.66667	1.86333	0.32	2.38446	1.2867e-06	2.44886e-06	WP_011965341.1	pectinesterase family protein [Phocaeicola vulgatus]	5.89052	up	PUL9	CE8
FHJOOPKJ_01247	54.3333	13	2.96333	0.546667	2.37747	2.6111e-20	9.01505e-20	WP_117884758.1	MULTISPECIES: TonB-dependent receptor [Bacteroidaceae]	19.5832	up	PUL17	susC
FHJOOPKJ_00751	13840.7	3319.33	840.877	157.6	2.37611	2.38387e-179	7.12642e-178	CUN81545.1	pyruvate phosphate dikinase [Phocaeicola vulgatus]	178.623	up
FHJOOPKJ_00611	114.333	27.6667	9.90667	1.84667	2.36937	6.84095e-23	2.58522e-22	WP_016270971.1	acetylxylan esterase [Phocaeicola vulgatus]	22.1649	up	PUL9	CE19
FHJOOPKJ_00467	11.6667	2.66667	110.523	20.95	2.3629	0.000270825	0.000447159	EGX27549.1	hypothetical protein BSFG_04767 [Bacteroides sp. 4_3_47FAA]	3.56731	up
FHJOOPKJ_01620	106.333	25.6667	18.8967	3.59333	2.36225	1.5356e-27	6.67421e-27	ALK83873.1	Rhamnogalacturonan acetylesterase rhgT [Phocaeicola vulgatus]	26.8137	up	PUL22	CE12
FHJOOPKJ_01013	150	36.6667	23.15	4.41667	2.34752	1.08399e-41	6.8134e-41	WP_057098887.1	DUF4861 domain-containing protein [Phocaeicola vulgatus]	40.965	up	PUL15	Unk
FHJOOPKJ_04165	32	7.66667	8.85667	1.67667	2.34408	4.40673e-08	9.11848e-08	OKZ35498.1	hypothetical protein BHV79_06420 [Bacteroides uniformis]	7.35588	up
FHJOOPKJ_02153	620.667	153.333	40.32	7.74333	2.33896	1.2521e-112	1.99306e-111	WP_008666475.1	MULTISPECIES: glycoside hydrolase family 3 C-terminal domain-containing protein [Bacteroidaceae]	111.902	up	PUL32	GH3
FHJOOPKJ_03355	103.333	25.6667	10.09	1.9	2.33593	4.65022e-26	1.92555e-25	EET15249.2	glycosyl hydrolase, family 43 [Bacteroides sp. 4_3_47FAA]	25.3325	up	PUL48	GH43_12
FHJOOPKJ_01872	155.333	38.6667	6.05667	1.19	2.32099	1.82141e-31	8.72045e-31	WP_118935603.1	ATP-binding protein [Phocaeicola vulgatus]	30.7396	up
FHJOOPKJ_00603	2998.67	750.333	534.25	103.48	2.31994	2.30789e-178	6.84364e-177	WP_196026712.1	aminoglycoside phosphotransferase family protein [Phocaeicola vulgatus]	177.637	up
FHJOOPKJ_03652	2890	725.333	263.007	50.8867	2.31984	3.31001e-235	1.41522e-233	WP_052573212.1	MULTISPECIES: hypothetical protein [Bacteroides]	234.48	up
FHJOOPKJ_01340	170.667	43	11.8067	2.27667	2.31367	1.08784e-45	7.50464e-45	WP_118236271.1	family 43 glycosylhydrolase [Phocaeicola vulgatus]	44.9634	up	PUL21	GH43_19
FHJOOPKJ_03047	199.667	50.3333	10.53	2.07667	2.30666	1.33883e-49	9.96533e-49	WP_011964882.1	TonB-dependent receptor [Phocaeicola vulgatus]	48.8733	up	PUL42	susC
FHJOOPKJ_00112	45.3333	11.3333	5.59333	1.11333	2.30506	6.85762e-16	2.05004e-15	WP_117699927.1	glycosyl hydrolase family 28 protein [Phocaeicola vulgatus]	15.1638	up	PUL4	GH28
FHJOOPKJ_00085	90.3333	22.6667	9.76333	1.95	2.30091	2.51175e-18	8.19494e-18	WP_016270864.1	MULTISPECIES: rhamnogalacturonan acetylesterase [Bacteroidaceae]	17.6	up
FHJOOPKJ_00500	1515	383.333	233.427	45.9167	2.30081	2.71228e-137	5.42015e-136	WP_012055794.1	MFS transporter [Phocaeicola vulgatus]	136.567	up
FHJOOPKJ_03657	3163	805.667	127.88	25.2067	2.3008	1.2144e-236	5.25336e-235	WP_044467396.1	MULTISPECIES: hypothetical protein [Bacteroides]	235.916	up	PUL50	Unk
FHJOOPKJ_01896	50.3333	12.6667	32.1367	6.31	2.29549	1.35234e-13	3.67249e-13	WP_032944562.1	MULTISPECIES: hypothetical protein [Bacteroidaceae]	12.8689	up
FHJOOPKJ_00237	26.6667	6.66667	4.06	0.806667	2.2946	8.48186e-10	1.92398e-09	WP_057279322.1	MULTISPECIES: imidazolonepropionase [Phocaeicola]	9.07151	up
FHJOOPKJ_00105	166	42.3333	15.66	3.06333	2.29404	2.46978e-41	1.52372e-40	WP_118171110.1	silent information regulator protein Sir2 [Phocaeicola vulgatus]	40.6073	up	PUL4	PL11
FHJOOPKJ_02072	237.333	60.6667	26.7367	5.31	2.28993	3.28933e-51	2.54094e-50	WP_016271381.1	arylsulfatase [Phocaeicola vulgatus]	50.4829	up
FHJOOPKJ_02085	42	10.6667	16.35	3.17	2.28684	2.22615e-14	6.25806e-14	RHC74319.1	lysine exporter LysO family protein [Phocaeicola vulgatus]	13.6524	up
FHJOOPKJ_03186	23.6667	6	2.61667	0.523333	2.28403	5.0751e-06	9.3166e-06	WP_005848769.1	MULTISPECIES: RagB/SusD family nutrient uptake outer membrane protein [Bacteroidaceae]	5.29456	up	PUL44	susD
FHJOOPKJ_00233	73.3333	18.6667	6.47333	1.30667	2.2817	4.53527e-20	1.54983e-19	WP_117694793.1	MULTISPECIES: urocanate hydratase [Bacteroidaceae]	19.3434	up
FHJOOPKJ_00294	933.667	238.333	355.293	70.19	2.2794	2.08833e-81	2.34827e-80	WP_032952358.1	4'-phosphopantetheinyl transferase superfamily protein [Phocaeicola vulgatus]	80.6802	up
FHJOOPKJ_02911	60.6667	15.6667	153.417	28.27	2.27665	1.8081e-18	5.91492e-18	MBT0708108.1	hypothetical protein [Phocaeicola vulgatus]	17.7428	up
FHJOOPKJ_00837	1582	408.667	309.713	61.8	2.27624	1.56584e-161	3.97074e-160	ALK83369.1	6-phosphofructokinase [Phocaeicola vulgatus]	160.805	up
FHJOOPKJ_03658	1984.33	511.667	311.37	62.4	2.27335	1.76911e-137	3.55466e-136	WP_044467393.1	MULTISPECIES: glycoside hydrolase family 88 protein [Bacteroides]	136.752	up	PUL50	GH105
FHJOOPKJ_01616	148.667	38.3333	7.51333	1.53	2.27093	2.5299e-39	1.48128e-38	WP_011965413.1	TonB-dependent receptor [Phocaeicola vulgatus]	38.5969	up	PUL22	susC
FHJOOPKJ_01800	30	7.66667	17.64	3.46	2.26889	1.14818e-10	2.73259e-10	MBT0709186.1	TonB-dependent receptor SusC [Phocaeicola vulgatus]	9.93999	up	PUL27	susC
FHJOOPKJ_00613	276.333	72.3333	13.46	2.68667	2.26658	2.69831e-42	1.72252e-41	WP_011965347.1	MULTISPECIES: PA14 domain-containing protein [Bacteroidaceae]	41.5689	up	PUL9	GH2
FHJOOPKJ_03046	118.333	30.6667	8.79	1.77333	2.26219	1.0681e-28	4.7605e-28	WP_117700083.1	glycoside hydrolase family 3 C-terminal domain-containing protein [Phocaeicola vulgatus]	27.9714	up	PUL42	GH3
FHJOOPKJ_04116	267.667	71.3333	77.1567	15.3233	2.24998	3.57831e-35	1.90137e-34	WP_057280544.1	MULTISPECIES: creatininase family protein [Bacteroidaceae]	34.4463	up
FHJOOPKJ_00994	3913.33	1032.67	602.34	122.89	2.24425	9.58866e-171	2.63116e-169	WP_005848966.1	NADH:flavin oxidoreductase [Phocaeicola vulgatus]	170.018	up
FHJOOPKJ_00090	10.3333	2.66667	3.89	0.756667	2.22309	0.000169081	0.000284275	RHD74909.1	hypothetical protein DW783_17600 [Phocaeicola vulgatus]	3.77191	up
FHJOOPKJ_01345	129.667	34.3333	11.5067	2.42667	2.22133	8.49168e-25	3.37921e-24	WP_117709746.1	family 43 glycosylhydrolase [Phocaeicola vulgatus]	24.071	up
FHJOOPKJ_03451	39	10.3333	27.6767	5.70333	2.22066	1.09219e-11	2.72461e-11	WP_005848117.1	MULTISPECIES: HU family DNA-binding protein [Bacteroidaceae]	10.9617	up
FHJOOPKJ_03465	41.3333	11	26.1633	5.53667	2.21362	4.91769e-13	1.3037e-12	WP_032944879.1	hypothetical protein [Phocaeicola vulgatus]	12.3082	up
FHJOOPKJ_03945	84.6667	23	18.6067	3.83	2.21033	9.06981e-18	2.90756e-17	WP_005844953.1	FecR domain-containing protein [Phocaeicola vulgatus]	17.0424	up
FHJOOPKJ_01347	337.667	91.6667	24.5067	5.11667	2.20778	5.82757e-58	4.97169e-57	MBT0709101.1	Glycosyl hydrolases family 35 [Phocaeicola vulgatus]	57.2345	up
FHJOOPKJ_01084	1339	360.667	394.997	82.1167	2.20528	4.36064e-116	7.22256e-115	WP_074783186.1	amidohydrolase [Phocaeicola vulgatus]	115.36	up
FHJOOPKJ_00187	876	237.667	68.15	14.4267	2.20091	3.5922e-106	5.45806e-105	WP_005845655.1	MULTISPECIES: peptidase domain-containing ABC transporter [Phocaeicola]	105.445	up
FHJOOPKJ_01797	367.667	100.333	84.2367	17.8167	2.19325	7.00208e-66	6.55131e-65	WP_005841048.1	MULTISPECIES: helix-turn-helix domain-containing protein [Bacteroidaceae]	65.1548	up
FHJOOPKJ_01384	513.667	141	61.4	13.08	2.18847	8.66722e-83	1.00218e-81	WP_005852065.1	arylsulfatase [Phocaeicola vulgatus]	82.0621	up
FHJOOPKJ_00031	28.3333	7.66667	4.30333	0.906667	2.18664	1.64889e-10	3.8965e-10	WP_117699502.1	glycoside hydrolase family 88 protein [Phocaeicola vulgatus]	9.78281	up	PUL2	GH88
FHJOOPKJ_03562	3478	959.333	254.507	54.5833	2.18186	8.45776e-235	3.534e-233	WP_057280269.1	MULTISPECIES: GH92 family glycosyl hydrolase [Phocaeicola]	234.073	up
FHJOOPKJ_02139	1452	400	151.55	32.4233	2.18137	4.47884e-166	1.16799e-164	WP_005846503.1	MULTISPECIES: putative transporter [Bacteroidaceae]	165.349	up
FHJOOPKJ_01088	5001.67	1372.67	730.413	156.477	2.17913	3.30797e-138	6.75745e-137	EOS05868.1	phenylacetate-CoA ligase [Phocaeicola vulgatus dnLKV7]	137.48	up
FHJOOPKJ_01085	8568	2349.33	956.06	206.763	2.17836	3.42889e-131	6.49898e-130	WP_117695154.1	thiamine pyrophosphate-dependent enzyme [Phocaeicola vulgatus]	130.465	up
FHJOOPKJ_03950	111.667	30.6667	282.9	58.6467	2.17454	1.61867e-21	5.83514e-21	WP_005838761.1	MULTISPECIES: DUF6132 family protein [Bacteroidaceae]	20.7908	up
FHJOOPKJ_03962	200.667	55.3333	37.9767	8.2	2.17373	7.61798e-35	3.99591e-34	WP_005838784.1	MULTISPECIES: butyrate kinase [Bacteroidaceae]	34.1182	up
FHJOOPKJ_01086	2742.33	761.667	1171.85	250.73	2.16622	1.7211e-184	5.31807e-183	WP_005846114.1	MULTISPECIES: indolepyruvate oxidoreductase subunit beta [Bacteroidaceae]	183.764	up
FHJOOPKJ_02164	49.3333	13.6667	3.42667	0.753333	2.16092	1.59311e-14	4.49913e-14	WP_022508597.1	DUF4982 domain-containing protein [Phocaeicola vulgatus]	13.7978	up	PUL32	GH2
FHJOOPKJ_03329	52.3333	14.6667	3.39333	0.72	2.1597	3.13747e-11	7.66543e-11	WP_117699572.1	glycoside hydrolase family 2 [Phocaeicola vulgatus]	10.5034	up	PUL47	GH2
FHJOOPKJ_01090	3548.33	990.667	350.667	76.8667	2.15876	6.87496e-134	1.33049e-132	EOS05870.1	hypothetical protein C800_00251 [Phocaeicola vulgatus dnLKV7]	133.163	up
FHJOOPKJ_00114	37.3333	10.3333	9.79333	2.10333	2.15748	1.43831e-11	3.57585e-11	WP_005843648.1	MULTISPECIES: hypothetical protein [Bacteroidaceae]	10.8421	up	PUL4	Unk
FHJOOPKJ_01087	4981.33	1388	712.707	155.573	2.15699	6.72682e-141	1.4134e-139	WP_117829641.1	pyridoxal phosphate-dependent aminotransferase [Phocaeicola vulgatus]	140.172	up
FHJOOPKJ_03944	138.333	39.3333	6.68	1.46667	2.1521	5.54566e-19	1.84371e-18	WP_117853586.1	TonB-dependent receptor [Phocaeicola vulgatus]	18.256	up	PUL53	susC
FHJOOPKJ_04188	1406	395.333	115.8	25.5033	2.15152	7.43056e-148	1.64591e-146	WP_005846490.1	MULTISPECIES: anaerobic ribonucleoside-triphosphate reductase [Bacteroidaceae]	147.129	up
FHJOOPKJ_00104	93.6667	26.3333	8.27667	1.81667	2.14752	2.17062e-26	9.12156e-26	WP_117696236.1	hypothetical protein [Phocaeicola vulgatus]	25.6634	up	PUL4	PL4
FHJOOPKJ_01348	367.333	103	26.75	5.90667	2.14652	1.12291e-54	9.15506e-54	WP_117695265.1	glycoside hydrolase family 127 protein [Phocaeicola vulgatus]	53.9497	up
FHJOOPKJ_00068	2143.67	607	80.6867	17.78	2.14175	9.28909e-172	2.56812e-170	WP_117699515.1	response regulator [Phocaeicola vulgatus]	171.032	up
FHJOOPKJ_01335	193.333	54.6667	14.43	3.19667	2.13986	2.22798e-37	1.23937e-36	WP_118236274.1	DUF2264 domain-containing protein [Phocaeicola vulgatus]	36.6521	up	PUL21	GH154
FHJOOPKJ_00904	4046.67	1157.67	641.097	140.197	2.1393	3.31348e-154	7.76029e-153	WP_005844404.1	MULTISPECIES: glycine C-acetyltransferase [Bacteroidaceae]	153.48	up
FHJOOPKJ_04224	22.6667	6.33333	42.2167	8.92667	2.13632	2.64321e-07	5.24223e-07	WP_005853458.1	MULTISPECIES: hypothetical protein [Phocaeicola]	6.57787	up
FHJOOPKJ_00047	12	3.33333	1.32667	0.28	2.13338	4.51507e-05	7.85703e-05	EOS04118.1	hypothetical protein C800_01867 [Phocaeicola vulgatus dnLKV7]	4.34534	up	PUL2	Unk
FHJOOPKJ_02922	6000.33	1717.67	786.717	173.707	2.13022	1.19248e-173	3.37289e-172	RHK74777.1	alpha-amylase [Phocaeicola vulgatus]	172.924	up
FHJOOPKJ_04191	37.3333	10.6667	56.3133	11.5	2.12911	5.66321e-10	1.29742e-09	WP_005853212.1	MULTISPECIES: hypothetical protein [Bacteroidaceae]	9.24694	up
FHJOOPKJ_02921	6883.67	1970.67	1020.71	225.677	2.12688	6.89389e-204	2.41417e-202	ALK85069.1	Glycosyltransferase [Phocaeicola vulgatus]	203.162	up
FHJOOPKJ_02126	185	53.6667	49.59	10.8667	2.12373	5.96116e-26	2.45731e-25	WP_008668696.1	MULTISPECIES: GNAT family N-acetyltransferase [Bacteroidaceae]	25.2247	up
FHJOOPKJ_03205	48	13.6667	193.247	40.7733	2.12314	2.75187e-07	5.45184e-07	WP_005843488.1	MULTISPECIES: hypothetical protein [Bacteroidaceae]	6.56037	up
FHJOOPKJ_01614	96.3333	27.6667	10.1667	2.23333	2.12233	3.08983e-27	1.32881e-26	WP_016269953.1	hypothetical protein [Phocaeicola vulgatus]	26.5101	up	PUL22	GH165
FHJOOPKJ_02165	811	232	33.5433	7.59	2.12118	1.82577e-73	1.85966e-72	WP_117699917.1	response regulator [Phocaeicola vulgatus]	72.7386	up
FHJOOPKJ_00889	200	57	7.63667	1.71667	2.12074	7.43077e-31	3.4911e-30	WP_118409908.1	ATP-binding protein [Phocaeicola vulgatus]	30.129	up	PUL14	Unk
FHJOOPKJ_01805	39.3333	11	6.76	1.53	2.11755	1.20229e-06	2.29295e-06	WP_117720499.1	glycosidase [Phocaeicola vulgatus]	5.91999	up	PUL27	GH130
FHJOOPKJ_03567	13	3.66667	6.30333	1.27333	2.11645	2.50983e-05	4.41774e-05	WP_118292593.1	sel1 repeat family protein [Phocaeicola vulgatus]	4.60036	up
FHJOOPKJ_03463	179.333	52.3333	31.2033	6.95333	2.11313	6.1427e-25	2.4658e-24	WP_032944887.1	MULTISPECIES: glycosyltransferase [Phocaeicola]	24.2116	up
FHJOOPKJ_00048	130.667	38	9.39	2.09	2.11	4.43726e-25	1.78901e-24	WP_117678272.1	glycoside hydrolase family 3 C-terminal domain-containing protein [Phocaeicola vulgatus]	24.3529	up	PUL2	GH3
FHJOOPKJ_03185	31.3333	9	1.66333	0.376667	2.10057	1.46095e-09	3.26959e-09	WP_151061847.1	TonB-dependent receptor [Phocaeicola vulgatus]	8.83536	up	PUL44	susC
FHJOOPKJ_02073	825.667	242.333	52.2033	11.8867	2.09339	8.16282e-84	9.55882e-83	EET16733.2	glycosyl hydrolase family 2, sugar binding domain protein [Bacteroides sp. 4_3_47FAA]	83.0882	up	PUL31	GH2
FHJOOPKJ_00092	15	4.33333	4.62667	0.963333	2.08542	6.83661e-05	0.000117854	WP_005842398.1	MULTISPECIES: hypothetical protein [Bacteroidaceae]	4.16516	up
FHJOOPKJ_03943	96.3333	28.3333	9.53333	2.21333	2.08396	4.0831e-19	1.36239e-18	WP_117815184.1	RagB/SusD family nutrient uptake outer membrane protein [Phocaeicola vulgatus]	18.389	up	PUL53	susD
FHJOOPKJ_02561	710.333	210	230.567	52.2667	2.08195	1.06584e-46	7.5658e-46	WP_005843954.1	MULTISPECIES: PorT family protein [Bacteroidaceae]	45.9723	up
FHJOOPKJ_02564	1640.67	485	524.03	118.757	2.08139	2.8072e-89	3.54711e-88	ALK83565.1	hypothetical protein BvMPK_0948 [Phocaeicola vulgatus]	88.5517	up
FHJOOPKJ_00108	729.333	216.333	59.3067	13.5767	2.07988	1.0224e-83	1.19345e-82	WP_118171109.1	beta-galactosidase [Phocaeicola vulgatus]	82.9904	up	PUL4	GH42
FHJOOPKJ_03642	344	103	201.913	44.6533	2.07946	1.48179e-35	7.91938e-35	WP_117977862.1	phage tail tube protein [Bacteroides thetaiotaomicron]	34.8292	up
FHJOOPKJ_00115	42	12.3333	5.52	1.26333	2.07915	7.8465e-10	1.78316e-09	WP_117699926.1	glycoside hydrolase family 28 protein [Phocaeicola vulgatus]	9.10532	up	PUL4	GH28
FHJOOPKJ_00084	236.333	70.3333	11.8467	2.7	2.07607	7.29661e-44	4.77396e-43	ALK86421.1	hypothetical protein BvMPK_3863 [Phocaeicola vulgatus]	43.1369	up
FHJOOPKJ_00073	174.333	51.6667	12.54	2.89	2.07408	3.55297e-38	2.01298e-37	WP_117720184.1	glycosyl hydrolase 115 family protein [Phocaeicola vulgatus]	37.4494	up	PUL3	GH115
FHJOOPKJ_01961	584.667	174.667	88.37	20.4433	2.06251	1.55122e-79	1.70264e-78	WP_016271860.1	DUF4934 domain-containing protein [Phocaeicola vulgatus]	78.8093	up
FHJOOPKJ_00038	14.6667	4.33333	21.9967	4.47667	2.061	1.93684e-05	3.42887e-05	EOS04109.1	hypothetical protein C800_01858 [Phocaeicola vulgatus dnLKV7]	4.71291	up	PUL2	Unk
FHJOOPKJ_03315	39.3333	11.6667	3.87	0.903333	2.05747	1.04652e-08	2.23335e-08	WP_008652217.1	MULTISPECIES: RagB/SusD family nutrient uptake outer membrane protein [Bacteroidaceae]	7.98025	up	PUL47	susD
FHJOOPKJ_01621	1067	322.667	259.613	60.1767	2.05603	3.71236e-91	4.75621e-90	WP_005842631.1	MULTISPECIES: SGNH/GDSL hydrolase family protein [Bacteroidaceae]	90.4304	up
FHJOOPKJ_00135	21.6667	6.33333	32.34	7.44	2.05438	6.0181e-06	1.09983e-05	ALK86492.1	hypothetical protein BvMPK_3940 [Phocaeicola vulgatus]	5.22054	up
FHJOOPKJ_01815	5461	1647.67	286.237	66.9667	2.05427	4.47364e-215	1.7135e-213	WP_016271641.1	SusC/RagA family TonB-linked outer membrane protein [Phocaeicola vulgatus]	214.349	up
FHJOOPKJ_01248	47	14	4.29333	0.996667	2.05348	6.97955e-10	1.59007e-09	WP_117699653.1	RagB/SusD family nutrient uptake outer membrane protein [Phocaeicola vulgatus]	9.15617	up	PUL17	susD
FHJOOPKJ_00608	18	5.33333	2.98667	0.676667	2.05283	6.02274e-07	1.17173e-06	WP_016270968.1	dienelactone hydrolase family protein [Phocaeicola vulgatus]	6.22021	up	PUL9	CE19
FHJOOPKJ_03351	146	44	16.9733	3.96333	2.04943	2.206e-31	1.05344e-30	EOS03954.1	sugar (Glycoside-Pentoside-Hexuronide) transporter [Phocaeicola vulgatus dnLKV7]	30.6564	up	PUL48	Unk
FHJOOPKJ_03467	221	67.3333	56.83	13.2233	2.04194	5.09391e-41	3.11135e-40	WP_005844783.1	MULTISPECIES: glycosyltransferase [Bacteroidaceae]	40.2929	up
FHJOOPKJ_01607	261	79.3333	84.4767	19.76	2.03752	2.38538e-43	1.54966e-42	BDC05949.1	thiazole biosynthesis protein ThiJ [Phocaeicola vulgatus]	42.6224	up
FHJOOPKJ_00728	60	18.3333	13.9867	3.19667	2.03568	1.04285e-15	3.09739e-15	WP_005842069.1	MULTISPECIES: AraC family transcriptional regulator [Phocaeicola]	14.9818	up
FHJOOPKJ_00868	282.333	86.3333	18.1767	4.29333	2.0341	9.80542e-57	8.17563e-56	WP_117699482.1	carboxypeptidase-like regulatory domain-containing protein [Phocaeicola vulgatus]	56.0085	up
FHJOOPKJ_00258	40.6667	12.3333	5.15	1.20667	2.02875	5.30272e-09	1.15169e-08	WP_016271364.1	MULTISPECIES: hypothetical protein [Phocaeicola]	8.2755	up
FHJOOPKJ_03333	50.3333	15.3333	5.41667	1.29667	2.02669	1.31937e-15	3.88728e-15	WP_016270770.1	O-antigen ligase family protein [Phocaeicola vulgatus]	14.8796	up
FHJOOPKJ_03875	313.333	96.3333	25.38	6.05	2.02604	2.37027e-52	1.86228e-51	WP_005848143.1	MULTISPECIES: family 78 glycoside hydrolase catalytic domain [Bacteroidaceae]	51.6252	up
FHJOOPKJ_03038	115.333	35.6667	5.66	1.34333	2.01758	1.53085e-25	6.24745e-25	WP_117700253.1	DUF5107 domain-containing protein [Phocaeicola vulgatus]	24.8151	up	PUL42	Unk
FHJOOPKJ_02691	761.667	236.333	63.63	15.26	2.0136	1.45599e-91	1.87848e-90	WP_118327683.1	GDSL-type esterase/lipase family protein [Phocaeicola vulgatus]	90.8368	up
FHJOOPKJ_00088	29.3333	9	3.84333	0.91	2.01337	1.63142e-09	3.64222e-09	EFG16530.1	arylsulfatase [Phocaeicola vulgatus PC510]	8.78743	up
FHJOOPKJ_02692	1851.67	574.333	120.783	29.1	2.01219	8.29936e-168	2.21136e-166	WP_012056032.1	MULTISPECIES: glycoside hydrolase family 2 protein [Bacteroidaceae]	167.081	up
FHJOOPKJ_00188	205	63.6667	34.17	8.18	2.00799	2.10314e-37	1.1717e-36	WP_032952673.1	MULTISPECIES: HlyD family secretion protein [Phocaeicola]	36.6771	up
FHJOOPKJ_01704	412.333	128.333	46.24	11.1567	2.00583	4.01026e-65	3.69567e-64	WP_008670961.1	MULTISPECIES: ClC family H(+)/Cl(-) exchange transporter [Bacteroidaceae]	64.3968	up
FHJOOPKJ_01147	10375.3	3241.33	629.217	152.72	2.00182	4.01523e-237	1.75762e-235	WP_117851934.1	carboxypeptidase-like regulatory domain-containing protein [Phocaeicola vulgatus]	236.396	up
FHJOOPKJ_03447	246.333	77.3333	67.16	16.1567	1.99468	1.06689e-41	6.71737e-41	WP_117700054.1	polysaccharide export protein [Phocaeicola vulgatus]	40.9719	up
FHJOOPKJ_04190	1248	393.667	62.4633	15.21	1.9924	5.64902e-104	8.47814e-103	WP_230326551.1	hypothetical protein [Phocaeicola vulgatus]	103.248	up
FHJOOPKJ_00110	73	23	4.23667	1.01667	1.98932	5.70826e-19	1.89434e-18	WP_016270884.1	hypothetical protein [Phocaeicola vulgatus]	18.2435	up	PUL4	GH2
FHJOOPKJ_01801	158.333	50	10.4233	2.54	1.98739	2.59118e-35	1.37884e-34	WP_057279857.1	TonB-dependent receptor [Phocaeicola vulgatus]	34.5865	up	PUL27	susC
FHJOOPKJ_04232	173.667	54.6667	18.7567	4.62333	1.98556	3.78684e-37	2.08759e-36	WP_117700202.1	IS1182 family transposase [Phocaeicola vulgatus]	36.4217	up
FHJOOPKJ_02068	42.6667	13.3333	34.44	8.15	1.98371	1.94214e-09	4.32804e-09	WP_117699666.1	PQQ-binding-like beta-propeller repeat protein [Phocaeicola vulgatus]	8.71172	up
FHJOOPKJ_01337	469.667	148.333	19.0133	4.68333	1.98368	5.64666e-54	4.53336e-53	WP_117699762.1	response regulator [Phocaeicola vulgatus]	53.2482	up	PUL21	Unk
FHJOOPKJ_02768	29.6667	9.33333	135.803	30.79	1.98368	3.25177e-09	7.13837e-09	CUP12449.1	Uncharacterised protein [Phocaeicola vulgatus]	8.48788	up
FHJOOPKJ_00620	32.6667	10.3333	2.16	0.51	1.9816	2.15604e-09	4.79889e-09	WP_011965340.1	hypothetical protein [Phocaeicola vulgatus]	8.66634	up
FHJOOPKJ_02729	62.6667	20	36.6667	8.78333	1.97977	7.48327e-09	1.61101e-08	WP_117925846.1	hypothetical protein [Phocaeicola vulgatus]	8.12591	up
FHJOOPKJ_02970	38	12	6.47333	1.56667	1.97853	7.37481e-12	1.851e-11	WP_005839119.1	MULTISPECIES: galactose mutarotase [Bacteroidaceae]	11.1322	up	PUL40	Unk
FHJOOPKJ_02738	7.66667	2.33333	47.1933	11.0667	1.97723	0.00295962	0.0044041	WP_008666897.1	MULTISPECIES: hypothetical protein [Bacteroidaceae]	2.52876	up
FHJOOPKJ_03974	7.66667	2.33333	0.793333	0.183333	1.97712	0.00209811	0.00317349	WP_121963113.1	MULTISPECIES: DNA topoisomerase [unclassified Parabacteroides]	2.67817	up
FHJOOPKJ_01945	17	5.33333	1.97333	0.466667	1.97262	8.11469e-06	1.46839e-05	WP_016270416.1	sodium:solute symporter [Phocaeicola vulgatus]	5.09073	up
FHJOOPKJ_00033	33.6667	10.6667	2.99333	0.753333	1.96178	3.03816e-09	6.68542e-09	WP_117699500.1	glycoside hydrolase family 97 protein [Phocaeicola vulgatus]	8.51739	up	PUL2	GH97
FHJOOPKJ_03469	136.667	43.6667	21.2	5.27	1.96124	2.59486e-20	8.96737e-20	WP_032952244.1	YjbH domain-containing protein [Phocaeicola vulgatus]	19.5859	up
FHJOOPKJ_01914	57.3333	18.3333	21.5667	5.15667	1.95937	1.3766e-13	3.73286e-13	WP_005847790.1	MULTISPECIES: hypothetical protein [Phocaeicola]	12.8612	up
FHJOOPKJ_00037	39.6667	12.6667	7.23	1.77667	1.95756	1.92316e-07	3.83693e-07	QUT56891.1	Glycosyl hydrolases family 28 [Phocaeicola vulgatus]	6.71598	up	PUL2	GH28
FHJOOPKJ_03157	333	108.333	133.417	32.9967	1.94766	6.36202e-33	3.17411e-32	ALK84914.1	Multiple antibiotic resistance protein marC [Phocaeicola vulgatus]	32.1964	up
FHJOOPKJ_01146	7094.33	2304	999.787	251.713	1.9473	4.35146e-216	1.68424e-214	WP_016270351.1	choice-of-anchor J domain-containing protein [Phocaeicola vulgatus]	215.361	up
FHJOOPKJ_01814	2933.33	958	257.987	65.1633	1.94381	4.2672e-137	8.43576e-136	WP_032952889.1	SusD/RagB family nutrient-binding outer membrane lipoprotein [Phocaeicola vulgatus]	136.37	up
FHJOOPKJ_03594	185.667	60.6667	13.3167	3.35333	1.93505	4.82178e-26	1.99434e-25	CAH09733.1	putative beta-hexosaminidase precursor [Bacteroides fragilis NCTC 9343]	25.3168	up	PUL49	GH20
FHJOOPKJ_01674	1767.67	576.333	121.677	31.0367	1.93374	1.73475e-123	3.1268e-122	WP_057250700.1	MULTISPECIES: glycoside hydrolase family 95 protein [Phocaeicola]	122.761	up	PUL24	GH95
FHJOOPKJ_03462	189.667	63	35.2133	8.76667	1.93203	2.43707e-20	8.43797e-20	WP_117921705.1	polysaccharide pyruvyl transferase family protein [Phocaeicola vulgatus]	19.6131	up
FHJOOPKJ_00607	28.6667	9.33333	2.92667	0.73	1.9304	5.51652e-09	1.19671e-08	WP_196026709.1	pectinesterase family protein [Phocaeicola vulgatus]	8.25833	up	PUL9	CE12
FHJOOPKJ_02903	2304.67	760	2051.93	507.76	1.92462	2.63443e-161	6.63479e-160	WP_005845365.1	MULTISPECIES: glycine cleavage system protein GcvH [Bacteroidaceae]	160.579	up
FHJOOPKJ_03190	562	185	23.07	5.94	1.92349	1.51081e-74	1.56046e-73	WP_008668393.1	MULTISPECIES: response regulator [Bacteroidaceae]	73.8208	up
FHJOOPKJ_03593	156.333	51.3333	37.2	9.50667	1.92198	1.89882e-30	8.77133e-30	WP_005811465.1	glycoside hydrolase family 16 protein [Bacteroides fragilis]	29.7215	up	PUL49	GH16_3
FHJOOPKJ_04235	96.6667	32	37.04	9.2	1.9219	3.51228e-20	1.20585e-19	WP_195530355.1	hypothetical protein [Phocaeicola vulgatus]	19.4544	up
FHJOOPKJ_01239	1373.67	455	410.667	104.517	1.91962	1.79562e-89	2.27672e-88	WP_117699793.1	DUF2807 domain-containing protein [Phocaeicola vulgatus]	88.7458	up
FHJOOPKJ_03074	336	111.333	84.03	21.6867	1.91013	6.79436e-50	5.06752e-49	WP_117700037.1	MULTISPECIES: 5-dehydro-4-deoxy-D-glucuronate isomerase [Bacteroidaceae]	49.1679	up
FHJOOPKJ_03794	2453.33	816.333	215.32	55.63	1.90975	1.63943e-168	4.40013e-167	WP_005849893.1	MULTISPECIES: family 20 glycosylhydrolase [Bacteroidaceae]	167.785	up
FHJOOPKJ_03466	48	16	29.2533	7.49	1.89919	4.13009e-12	1.05169e-11	WP_032952236.1	MULTISPECIES: glycosyl transferase family 28 [Phocaeicola]	11.384	up
FHJOOPKJ_01850	277.667	93	20.03	5.27333	1.89287	8.13275e-31	3.8046e-30	WP_038611888.1	MULTISPECIES: beta-galactosidase [Bacteroidaceae]	30.0898	up	PUL30	GH35
FHJOOPKJ_03215	2074	697.333	275.753	72.0833	1.89187	2.31033e-143	4.93901e-142	WP_005852412.1	MULTISPECIES: C1 family peptidase [Bacteroidaceae]	142.636	up
FHJOOPKJ_03952	1128.33	382	1195.96	300.863	1.89038	8.16928e-103	1.19675e-101	WP_005849722.1	MULTISPECIES: MarR family transcriptional regulator [Bacteroidaceae]	102.088	up
FHJOOPKJ_00995	1295	437	309.273	80.28	1.89033	5.5228e-123	9.90602e-122	WP_005845883.1	MULTISPECIES: SDR family NAD(P)-dependent oxidoreductase [Bacteroidaceae]	122.258	up
FHJOOPKJ_04238	20	6.66667	28.0467	6.94333	1.88647	3.25397e-06	6.05815e-06	WP_214445487.1	hypothetical protein [Phocaeicola dorei]	5.48759	up
FHJOOPKJ_02910	3074.33	1039	321.163	84.5733	1.88452	7.63044e-164	1.96204e-162	WP_057279972.1	Na/Pi cotransporter family protein [Phocaeicola vulgatus]	163.117	up
FHJOOPKJ_01823	516.333	175.667	26.4	7.02333	1.87598	9.09407e-68	8.84627e-67	WP_172773107.1	TonB-dependent receptor [Phocaeicola vulgatus]	67.0412	up	PUL28	susC
FHJOOPKJ_00633	977	332	123.317	32.5833	1.87585	1.74732e-98	2.42449e-97	WP_005842808.1	MULTISPECIES: aldehyde dehydrogenase [Bacteroidaceae]	97.7576	up	PUL10	Unk
FHJOOPKJ_02698	4670.33	1598.67	765.02	201.953	1.87377	1.91705e-167	5.07122e-166	ABR41735.1	N-acetylglucosamine-6-phosphate deacetylase [Phocaeicola vulgatus ATCC 8482]	166.717	up
FHJOOPKJ_02752	2703.67	924	183.387	48.5667	1.87284	1.69663e-121	3.01376e-120	WP_195642908.1	DNA methylase N-4 [Phocaeicola vulgatus]	120.77	up
FHJOOPKJ_02037	1413.67	482.333	125.137	32.7133	1.87162	1.20229e-81	1.36445e-80	WP_118236225.1	DUF3874 domain-containing protein [Phocaeicola vulgatus]	80.92	up
FHJOOPKJ_02737	11	3.66667	26.81	6.54667	1.87114	0.00282247	0.00420341	WP_054349666.1	DUF3873 family protein [Phocaeicola dorei]	2.54937	up
FHJOOPKJ_02920	12539	4285.33	1118.78	297.16	1.87018	4.4824e-203	1.54035e-201	EFG17552.1	putative glycogen debranching enzyme, archaeal type [Phocaeicola vulgatus PC510]	202.348	up
FHJOOPKJ_03554	177.667	61	139.65	35.66	1.86657	1.35564e-35	7.25571e-35	WP_011964840.1	pyridoxamine 5'-phosphate oxidase family protein [Phocaeicola vulgatus]	34.8679	up
FHJOOPKJ_00111	46	15.6667	6.71333	1.79667	1.86646	2.34826e-12	6.05084e-12	WP_005853725.1	MULTISPECIES: rhamnogalacturonan acetylesterase [Bacteroidaceae]	11.6293	up	PUL4	CE12
FHJOOPKJ_02736	81.3333	27.6667	115.597	29.6867	1.8642	8.55543e-16	2.5493e-15	WP_057279737.1	MULTISPECIES: hypothetical protein [Phocaeicola]	15.0678	up
FHJOOPKJ_02765	149.667	52	430.063	108.68	1.85833	5.15296e-24	2.0029e-23	WP_038609523.1	MULTISPECIES: hypothetical protein [Bacteroidaceae]	23.2879	up
FHJOOPKJ_03014	202	69.3333	16.79	4.54	1.85533	7.03897e-21	2.48629e-20	WP_117699852.1	glycoside hydrolase N-terminal domain-containing protein [Phocaeicola vulgatus]	20.1525	up
FHJOOPKJ_01422	461	160.333	38.98	10.5333	1.85028	2.91855e-53	2.31282e-52	WP_008670059.1	MULTISPECIES: histidine kinase [Bacteroidaceae]	52.5348	up
FHJOOPKJ_02067	72	25	15.53	4.10333	1.84971	1.59232e-14	4.49913e-14	WP_016271383.1	endonuclease/exonuclease/phosphatase family protein [Phocaeicola vulgatus]	13.798	up
FHJOOPKJ_03048	146	50.3333	13.0067	3.54	1.84944	1.36247e-24	5.37534e-24	WP_011964881.1	RagB/SusD family nutrient uptake outer membrane protein [Phocaeicola vulgatus]	23.8657	up	PUL42	susD
FHJOOPKJ_01705	129.333	45	152.61	39.29	1.84767	7.57337e-19	2.50425e-18	ABR40082.1	putative transcriptional regulator [Phocaeicola vulgatus ATCC 8482]	18.1207	up
FHJOOPKJ_04161	98	34.3333	200.42	51.7033	1.83873	1.67566e-15	4.9134e-15	AII69199.1	hypothetical protein GV66_16530 [Phocaeicola dorei]	14.7758	up
FHJOOPKJ_03776	234	82	8.57333	2.36	1.83526	1.93916e-43	1.262e-42	WP_016271020.1	response regulator [Phocaeicola vulgatus]	42.7124	up	PUL51	Unk
FHJOOPKJ_00032	40.3333	14	4.31667	1.17667	1.83477	3.4768e-10	8.07082e-10	WP_118327433.1	glycoside hydrolase 43 family protein [Phocaeicola vulgatus]	9.45882	up	PUL2	GH43_10
FHJOOPKJ_02837	1362	480.667	304.837	82.8	1.83292	7.56887e-103	1.11323e-101	ABR40001.1	glycoside hydrolase family 73 [Phocaeicola vulgatus ATCC 8482]	102.121	up
FHJOOPKJ_01128	1025.67	361	121.747	33.1033	1.82999	1.19306e-79	1.31344e-78	WP_005846190.1	MULTISPECIES: L-arabinose isomerase [Bacteroidaceae]	78.9233	up
FHJOOPKJ_01428	850.333	301	151.21	41.09	1.82802	5.67888e-68	5.55352e-67	ALK85893.1	Alanine dehydrogenase [Phocaeicola vulgatus]	67.2457	up
FHJOOPKJ_01334	81.6667	28.3333	12.3933	3.44	1.8277	3.01988e-12	7.73805e-12	WP_008781450.1	MULTISPECIES: BNR repeat-containing protein [Bacteroidaceae]	11.52	up	PUL21	PL42
FHJOOPKJ_03470	1697.67	598.333	258.17	70.23	1.82678	1.88959e-69	1.88805e-68	WP_032952246.1	carboxypeptidase-like regulatory domain-containing protein [Phocaeicola vulgatus]	68.7236	up
FHJOOPKJ_03448	906	318.667	64.96	17.7767	1.82401	5.30698e-67	5.06851e-66	WP_117700055.1	tyrosine-protein kinase [Phocaeicola vulgatus]	66.2752	up
FHJOOPKJ_02742	36	12.6667	56.9667	14.44	1.82368	6.59734e-10	1.50487e-09	WP_118440029.1	MULTISPECIES: hypothetical protein [Bacteroidaceae]	9.18063	up
FHJOOPKJ_01605	5139	1824.67	591.89	162.17	1.82198	5.25109e-132	1.00564e-130	WP_005848863.1	Gfo/Idh/MocA family oxidoreductase [Phocaeicola vulgatus]	131.28	up
FHJOOPKJ_01675	315.333	112	13.2667	3.65667	1.82177	1.82387e-31	8.72089e-31	WP_117699820.1	response regulator [Phocaeicola vulgatus]	30.739	up	PUL24	Unk
FHJOOPKJ_03953	814.333	288.667	281.203	77.02	1.81589	4.82424e-75	5.01094e-74	WP_016271110.1	M15 family metallopeptidase [Phocaeicola vulgatus]	74.3166	up
FHJOOPKJ_03468	285	101.333	84.7933	23.4167	1.80663	5.67787e-23	2.159e-22	WP_032952241.1	YjbH domain-containing protein [Phocaeicola vulgatus]	22.2458	up
FHJOOPKJ_03334	943	337.667	171.19	47.4967	1.8	2.10454e-77	2.24953e-76	EFV66128.1	cation efflux system protein [Bacteroides sp. 3_1_40A]	76.6768	up
FHJOOPKJ_03561	1649.67	594	122.797	34.2233	1.79967	7.81948e-134	1.50535e-132	WP_005850708.1	MULTISPECIES: GH92 family glycosyl hydrolase [Bacteroidaceae]	133.107	up
FHJOOPKJ_00087	73.3333	26.3333	4.26333	1.2	1.79404	5.80835e-17	1.79927e-16	WP_117870540.1	glycoside hydrolase family 2 protein [Phocaeicola vulgatus]	16.2359	up
FHJOOPKJ_00435	14	5	3.39667	0.95	1.77761	0.000423933	0.000687302	WP_005843145.1	MULTISPECIES: TolC family protein [Bacteroidaceae]	3.3727	up
FHJOOPKJ_02753	1022.67	372.333	165.257	46.6133	1.77692	1.66787e-79	1.82522e-78	KAB6472853.1	hypothetical protein GAZ06_19245 [Phocaeicola vulgatus]	78.7778	up
FHJOOPKJ_03793	1560.33	574	114.797	32.7667	1.76921	1.55991e-108	2.42016e-107	ALK86356.1	Beta-hexosaminidase [Phocaeicola vulgatus]	107.807	up
FHJOOPKJ_01145	677.333	249	92.39	26.2833	1.76784	6.5021e-80	7.17965e-79	WP_016270352.1	endonuclease/exonuclease/phosphatase family protein [Phocaeicola vulgatus]	79.1869	up
FHJOOPKJ_02726	321.667	118.667	20.38	5.77667	1.76672	3.19273e-24	1.24625e-23	WP_117853944.1	hypothetical protein [Phocaeicola vulgatus]	23.4958	up
FHJOOPKJ_00019	1110	410	111.09	31.77	1.7615	4.04087e-101	5.82677e-100	A6KWM0.1	RecName: Full=Alpha-1,3-galactosidase B; AltName: Full=Exo-alpha-galactosidase B1; Flags: Precursor [Phocaeicola vulgatus ATCC 8482]	100.394	up	PUL1	GH110
FHJOOPKJ_00016	2297.33	847	197.077	56.51	1.75892	3.03118e-87	3.66633e-86	WP_005851052.1	alpha-L-fucosidase [Phocaeicola vulgatus]	86.5184	up	PUL1	GH29
FHJOOPKJ_03869	45.3333	16.6667	3.14667	0.91	1.75502	1.83776e-11	4.5413e-11	WP_032944866.1	MULTISPECIES: glycoside hydrolase family 95 protein [Bacteroidaceae]	10.7357	up
FHJOOPKJ_04247	27.3333	10	30.1767	8.38	1.75352	9.22384e-07	1.77571e-06	RIB31221.1	hypothetical protein CK234_03911 [Phocaeicola vulgatus]	6.03509	up
FHJOOPKJ_03471	1504.67	560.667	271.163	77.4033	1.75296	2.1032e-36	1.13895e-35	WP_005844781.1	MULTISPECIES: GDP-mannose 4,6-dehydratase [Bacteroidaceae]	35.6771	up
FHJOOPKJ_01130	257.333	95.3333	86.4933	24.6467	1.75284	1.84127e-41	1.14752e-40	WP_005846195.1	MULTISPECIES: NUDIX domain-containing protein [Bacteroidaceae]	40.7349	up
FHJOOPKJ_04117	1990.67	740.333	324.553	92.66	1.75272	1.08907e-118	1.85394e-117	WP_005844938.1	MULTISPECIES: iron-containing alcohol dehydrogenase [Bacteroidaceae]	117.963	up
FHJOOPKJ_02732	322.667	120	45.0467	12.95	1.7514	1.73101e-38	9.91421e-38	WP_087338272.1	MULTISPECIES: phage terminase large subunit [Bacteroidaceae]	37.7617	up
FHJOOPKJ_02971	252.667	93.6667	10.4733	3.05333	1.75072	1.05469e-38	6.08805e-38	WP_005848737.1	response regulator [Phocaeicola vulgatus]	37.9769	up	PUL40	Unk
FHJOOPKJ_03589	44.6667	16.6667	6.43	1.8	1.75021	3.53007e-09	7.73544e-09	WP_005822191.1	MULTISPECIES: hypothetical protein [Bacteroidaceae]	8.45222	up
FHJOOPKJ_00335	253.333	93.6667	29.67	8.6	1.74885	4.65878e-28	2.05154e-27	ABR41656.1	glycoside hydrolase family 51, candidate alpha-L-arabinofuranosidase [Phocaeicola vulgatus ATCC 8482]	27.3317	up
FHJOOPKJ_00120	7053.67	2627.67	5976.56	1680.25	1.74438	6.17725e-151	1.39348e-149	WP_005843638.1	MULTISPECIES: L-rhamnose mutarotase [Bacteroidaceae]	150.209	up
FHJOOPKJ_00039	145.333	54.3333	16.0733	4.66	1.74188	6.63216e-25	2.65647e-24	WP_016270832.1	glycoside hydrolase family protein [Phocaeicola vulgatus]	24.1783	up	PUL2	Unk
FHJOOPKJ_00691	551.333	205.667	958.337	267.823	1.73769	4.26792e-42	2.71978e-41	WP_005852491.1	MULTISPECIES: hypothetical protein [Bacteroidaceae]	41.3698	up
FHJOOPKJ_00106	79.6667	30	4.01333	1.17667	1.73382	3.19239e-12	8.15734e-12	WP_117696238.1	glycosyl hydrolase family 28 protein [Phocaeicola vulgatus]	11.4959	up	PUL4	GH28
FHJOOPKJ_04046	3016	1139.67	1860.05	532.887	1.73309	2.47598e-94	3.28671e-93	WP_005839531.1	MULTISPECIES: V-type ATP synthase subunit K [Bacteroidaceae]	93.6063	up
FHJOOPKJ_04121	3918.33	1477.67	312.967	91.5933	1.72721	9.88486e-118	1.66728e-116	WP_005846003.1	MULTISPECIES: GH92 family glycosyl hydrolase [Bacteroidaceae]	117.005	up
FHJOOPKJ_03534	144.333	54.6667	20.8567	6.05	1.7263	4.42021e-27	1.8943e-26	WP_005814044.1	MULTISPECIES: IS1380-like element IS612 family transposase [Bacteria]	26.3546	up
FHJOOPKJ_02057	1843.33	697.667	109.463	32.2367	1.72301	1.30772e-112	2.07263e-111	WP_117694147.1	TonB-dependent receptor [Phocaeicola vulgatus]	111.883	up
FHJOOPKJ_03472	490.333	186.333	88.79	25.9433	1.72219	2.52316e-50	1.89727e-49	WP_117700062.1	GDP-L-fucose synthase [Phocaeicola vulgatus]	49.5981	up
FHJOOPKJ_03592	164	62.3333	15.13	4.42	1.72031	4.38744e-20	1.50071e-19	WP_044820125.1	beta-galactosidase [Bacteroides fragilis]	19.3578	up	PUL49	GH35
FHJOOPKJ_01315	1440	547.333	397.983	116.14	1.72003	1.30246e-99	1.84198e-98	WP_005840261.1	MULTISPECIES: phosphatase PAP2 family protein [Bacteroidaceae]	98.8852	up
FHJOOPKJ_01265	158.333	60.3333	17.5067	5.19	1.7189	4.27803e-20	1.46465e-19	WP_016271133.1	MULTISPECIES: tetratricopeptide repeat protein [Bacteroidaceae]	19.3688	up
FHJOOPKJ_00624	54	20.3333	11.2433	3.34	1.71267	1.27202e-07	2.56145e-07	WP_032953507.1	MULTISPECIES: pectinesterase family protein [Bacteroidaceae]	6.89551	up
FHJOOPKJ_00200	424	162	21.6267	6.39667	1.71127	8.54845e-53	6.7452e-52	MBT0708878.1	Beta-galactosidase [Phocaeicola vulgatus]	52.0681	up	PUL5	GH2
FHJOOPKJ_01803	36	13.6667	10.46	3.06667	1.70927	5.42778e-09	1.17816e-08	ALK82667.1	RagB/SusD Domain-Containing Protein [Phocaeicola vulgatus]	8.26538	up	PUL27	susD
FHJOOPKJ_00116	233.333	89	14.1433	4.22667	1.70706	1.09359e-34	5.71994e-34	WP_117699925.1	glycosyl hydrolase family 2 [Phocaeicola vulgatus]	33.9611	up	PUL4	GH106
FHJOOPKJ_00185	208	80	177.453	50.86	1.70252	2.81967e-23	1.07999e-22	WP_016271324.1	MULTISPECIES: DUF3244 domain-containing protein [Phocaeicola]	22.5498	up
FHJOOPKJ_03850	63.3333	24.6667	162.887	44.74	1.69842	1.75933e-07	3.51197e-07	WP_016271276.1	MULTISPECIES: hypothetical protein [Phocaeicola]	6.75465	up
FHJOOPKJ_02580	103	39.3333	49.4767	14.7267	1.69771	1.17787e-13	3.20816e-13	WP_005849873.1	MULTISPECIES: hypothetical protein [Bacteroidaceae]	12.9289	up
FHJOOPKJ_03828	394.667	151.667	143.203	42.91	1.69702	1.73369e-48	1.26987e-47	WP_005843570.1	MULTISPECIES: NAAT family transporter [Bacteroidaceae]	47.761	up
FHJOOPKJ_02539	46.6667	18	131.047	37.0067	1.69582	6.00216e-10	1.37336e-09	ALK84858.1	ferritin A [Phocaeicola vulgatus]	9.22169	up
FHJOOPKJ_01899	860	332.667	359.5	105.85	1.69521	2.15786e-63	1.96398e-62	WP_005846781.1	MULTISPECIES: YqgE/AlgH family protein [Bacteroidaceae]	62.666	up
FHJOOPKJ_00651	14	5.33333	1.39333	0.406667	1.69516	0.000472509	0.000763364	WP_117695920.1	glycoside hydrolase family 28 protein [Phocaeicola vulgatus]	3.32559	up	PUL11	GH28
FHJOOPKJ_03985	104.333	40	23.75	7.16667	1.69449	5.01003e-14	1.38615e-13	WP_016270772.1	MULTISPECIES: signal peptidase I [Bacteroidaceae]	13.3002	up
FHJOOPKJ_01699	278.333	107.667	44.29	13.27	1.6908	8.12009e-43	5.229e-42	WP_005840463.1	MULTISPECIES: AhpC/TSA family protein [Bacteroidaceae]	42.0904	up
FHJOOPKJ_04239	37.6667	14.6667	58.6467	16.3133	1.68374	3.53054e-07	6.93843e-07	WP_229108269.1	hypothetical protein [Phocaeicola vulgatus]	6.45216	up
FHJOOPKJ_00625	34.3333	13.3333	5.27333	1.56333	1.68369	2.18578e-08	4.58478e-08	WP_008669625.1	MULTISPECIES: glycoside hydrolase family 88 protein [Bacteroidaceae]	7.66039	up
FHJOOPKJ_03335	1496	584	80.3033	24.2633	1.68307	1.83213e-99	2.58113e-98	WP_008670211.1	MULTISPECIES: efflux RND transporter permease subunit [Bacteroidaceae]	98.737	up
FHJOOPKJ_03595	124.333	48.6667	30.9	9.22667	1.67794	6.56682e-18	2.11549e-17	EXY31412.1	glycosyl hydrolases 16 family protein [Bacteroides fragilis str. 3397 T10]	17.1826	up	PUL49	GH16_3
FHJOOPKJ_02734	314.667	123.333	40.1533	12.11	1.67775	7.03557e-43	4.54654e-42	WP_117710058.1	MULTISPECIES: ParB N-terminal domain-containing protein [Phocaeicola]	42.1527	up
FHJOOPKJ_02137	18	7	52.7367	14.68	1.67525	0.000263454	0.000435771	WP_005846507.1	MULTISPECIES: hypothetical protein [Bacteroidaceae]	3.5793	up
FHJOOPKJ_02727	222.667	87.6667	20.24	6.19333	1.67504	1.04427e-24	4.13325e-24	WP_038609475.1	MULTISPECIES: hypothetical protein [Phocaeicola]	23.9812	up
FHJOOPKJ_02754	169	66.3333	126.38	37.7433	1.66917	7.1761e-24	2.77753e-23	WP_011965780.1	MULTISPECIES: PcfK-like family protein [Bacteroidaceae]	23.1441	up
FHJOOPKJ_03635	306	120.333	44.69	13.6	1.66881	1.25995e-41	7.90589e-41	WP_117979967.1	phage portal protein [Bacteroides thetaiotaomicron]	40.8996	up
FHJOOPKJ_02969	72	28	6.86667	2.11333	1.66822	2.40768e-11	5.9178e-11	WP_175324415.1	beta-galactosidase [Phocaeicola vulgatus]	10.6184	up	PUL40	GH2
FHJOOPKJ_03392	151.333	59.3333	42.3767	12.7133	1.66701	1.43887e-24	5.67067e-24	WP_077153019.1	MULTISPECIES: hypothetical protein [Bacteroidales]	23.842	up
FHJOOPKJ_02757	158.667	62.6667	153.887	45.6533	1.66288	5.98807e-23	2.27225e-22	WP_117925852.1	MULTISPECIES: VRR-NUC domain-containing protein [Phocaeicola]	22.2227	up
FHJOOPKJ_04225	36.6667	14.3333	30.01	8.75	1.66254	6.68972e-06	1.21592e-05	WP_117875763.1	hypothetical protein [Phocaeicola vulgatus]	5.17459	up
FHJOOPKJ_02755	167.667	66.3333	159.59	47.2633	1.66171	1.5112e-24	5.94933e-24	MBO5507765.1	hypothetical protein [Bacteroides sp.]	23.8207	up
FHJOOPKJ_03461	154.667	61.6667	28.5733	8.75	1.65207	8.15413e-22	2.97153e-21	WP_080704542.1	MULTISPECIES: Coenzyme F420 hydrogenase/dehydrogenase, beta subunit C-terminal domain [Phocaeicola]	21.0886	up
FHJOOPKJ_02620	200	80	42.12	12.89	1.64618	8.72077e-33	4.32743e-32	WP_172770062.1	GNAT family N-acetyltransferase [Phocaeicola vulgatus]	32.0594	up
FHJOOPKJ_04044	2977.33	1197.33	1191.31	360.773	1.64418	1.97956e-84	2.33297e-83	WP_005839527.1	MULTISPECIES: V-type ATP synthase subunit D [Bacteroidaceae]	83.7034	up
FHJOOPKJ_02735	100.667	40.3333	41.8233	12.6767	1.64273	8.2897e-20	2.81192e-19	WP_087338266.1	MULTISPECIES: ParB N-terminal domain-containing protein [Phocaeicola]	19.0815	up
FHJOOPKJ_02733	90	36	42.8967	13.09	1.64174	3.51585e-16	1.05705e-15	WP_038609487.1	MULTISPECIES: DNA-packaging protein [Bacteroidaceae]	15.454	up
FHJOOPKJ_02751	75	30	250.517	73.81	1.64039	1.92884e-12	4.98408e-12	WP_217767190.1	hypothetical protein, partial [Phocaeicola vulgatus]	11.7147	up
FHJOOPKJ_03206	74	30	109.933	31.76	1.6361	1.6524e-11	4.09701e-11	WP_117699782.1	MULTISPECIES: thioredoxin family protein [Phocaeicola]	10.7819	up
FHJOOPKJ_02745	58	23.3333	128.37	37.38	1.63567	5.9835e-11	1.44461e-10	WP_117853951.1	MULTISPECIES: hypothetical protein [Phocaeicola]	10.223	up
FHJOOPKJ_01802	35	14	6.73	2.09333	1.63405	8.91372e-09	1.91112e-08	MBT0709184.1	SusD-like protein P25 [Phocaeicola vulgatus]	8.04994	up	PUL27	susD
FHJOOPKJ_01133	16987.3	6854.67	2793	866.43	1.63168	1.28621e-141	2.73374e-140	WP_005846201.1	MULTISPECIES: galactokinase [Bacteroidaceae]	140.891	up
FHJOOPKJ_03935	59.6667	24	10.23	3.20667	1.631	6.06992e-11	1.46355e-10	EET14566.2	hypothetical protein BSFG_00713 [Bacteroides sp. 4_3_47FAA]	10.2168	up
FHJOOPKJ_03705	30	12	7.31667	2.29333	1.62726	4.37874e-05	7.62701e-05	WP_117833791.1	glycine betaine ABC transporter substrate-binding protein [Phocaeicola vulgatus]	4.35865	up
FHJOOPKJ_00850	175	70.3333	27.7933	8.79	1.62657	1.12904e-21	4.09417e-21	WP_117699475.1	DUF4221 domain-containing protein [Phocaeicola vulgatus]	20.9473	up
FHJOOPKJ_03984	248.667	101	22.66	7.11	1.62568	1.19763e-33	6.07405e-33	ALK86331.1	hypothetical protein BvMPK_3771 [Phocaeicola vulgatus]	32.9217	up
FHJOOPKJ_01852	81	32.6667	13.23	4.17	1.62493	2.88541e-14	8.08047e-14	WP_038611885.1	MULTISPECIES: esterase [Bacteroidaceae]	13.5398	up	PUL30	CE1
FHJOOPKJ_02746	168.667	68.6667	165.173	50	1.62093	2.57365e-29	1.16114e-28	WP_148359767.1	hypothetical protein [Bacteroides clarus]	28.5895	up
FHJOOPKJ_00895	11787	4804.67	587.837	186.493	1.61832	3.16155e-115	5.16668e-114	WP_117700183.1	DUF4981 domain-containing protein [Phocaeicola vulgatus]	114.5	up
FHJOOPKJ_04045	8370.33	3427.67	809.58	256.05	1.61495	1.03736e-140	2.16726e-139	WP_005839529.1	MULTISPECIES: V-type ATP synthase subunit I [Bacteroidaceae]	139.984	up
FHJOOPKJ_04041	2428.33	1002.33	608.277	191.523	1.60685	1.02015e-76	1.081e-75	WP_005839521.1	MULTISPECIES: DUF2764 domain-containing protein [Bacteroidaceae]	75.9913	up
FHJOOPKJ_04214	8.33333	3.33333	1.54667	0.52	1.593	0.0143614	0.019897	WP_121963115.1	hypothetical protein [Parabacteroides sp. AM17-47]	1.8428	none
FHJOOPKJ_04040	3333.33	1382	1383.64	435.357	1.5928	5.61408e-115	9.13407e-114	WP_012055764.1	hypothetical protein [Phocaeicola vulgatus]	114.251	up
FHJOOPKJ_02559	73	30.3333	30.7667	9.60333	1.59229	2.71763e-14	7.61642e-14	WP_032953299.1	MULTISPECIES: outer membrane beta-barrel protein [Bacteroidaceae]	13.5658	up
FHJOOPKJ_03983	389.333	160	71.79	23.2133	1.59177	7.38551e-23	2.78528e-22	WP_008670224.1	MULTISPECIES: 6-bladed beta-propeller [Bacteroidaceae]	22.1316	up
FHJOOPKJ_02747	240.333	100	184.733	57.98	1.58544	1.86088e-30	8.60684e-30	WP_172773144.1	hypothetical protein [Phocaeicola vulgatus]	29.7303	up
FHJOOPKJ_00337	3240.33	1354.67	439.25	142.217	1.58141	9.11741e-124	1.65146e-122	WP_005847124.1	MULTISPECIES: alpha-L-fucosidase [Bacteroidaceae]	123.04	up
FHJOOPKJ_00109	433.333	181	31.1133	10.1067	1.57999	3.25795e-37	1.80959e-36	WP_117699928.1	family 43 glycosylhydrolase [Phocaeicola vulgatus]	36.4871	up	PUL4	GH43_34
FHJOOPKJ_01069	6.66667	2.66667	0.6	0.2	1.57501	0.0199259	0.0271764	WP_117699406.1	bifunctional DNA primase/helicase [Phocaeicola vulgatus]	1.70058	none
FHJOOPKJ_01606	211.333	89	64.5367	20.5567	1.57496	1.63886e-29	7.43963e-29	WP_005848864.1	MULTISPECIES: nitroreductase family protein [Bacteroidaceae]	28.7855	up
FHJOOPKJ_02084	3603.67	1512.67	386.837	125.663	1.5737	3.13795e-64	2.87021e-63	WP_012055523.1	MULTISPECIES: peptide MFS transporter [Bacteroidaceae]	63.5034	up
FHJOOPKJ_02748	133.667	56.3333	202.427	63.0467	1.56777	1.15177e-22	4.31267e-22	WP_216943760.1	hypothetical protein [Phocaeicola vulgatus]	21.9386	up
FHJOOPKJ_03808	221.667	93.6667	56.6733	18.3533	1.56754	8.51104e-31	3.97146e-30	EET14122.1	endonuclease/exonuclease/phosphatase family protein [Bacteroides sp. 4_3_47FAA]	30.07	up
FHJOOPKJ_03318	7.33333	3	11.2667	3.51	1.56663	0.0128053	0.0178083	WP_117699576.1	hypothetical protein [Phocaeicola vulgatus]	1.89261	none	PUL47	Unk
FHJOOPKJ_00121	16233	6871.67	3316.58	1078.47	1.56648	3.49652e-135	6.87525e-134	WP_005843636.1	MULTISPECIES: ROK family protein [Bacteroidaceae]	134.456	up
FHJOOPKJ_03460	98.6667	42	17.0133	5.28	1.56634	4.79484e-09	1.0448e-08	WP_117700058.1	MULTISPECIES: glycosyltransferase family 4 protein [Phocaeicola]	8.31923	up
FHJOOPKJ_04180	54.3333	23	75.4067	23.3433	1.562	1.285e-10	3.05033e-10	WP_146334842.1	DUF5712 family protein [Parabacteroides distasonis]	9.8911	up
FHJOOPKJ_02540	15	6.33333	44.1767	13.19	1.55907	0.000427302	0.000692458	WP_012055752.1	hypothetical protein [Phocaeicola vulgatus]	3.36927	up
FHJOOPKJ_03039	82.3333	35	7.16333	2.37	1.55391	2.90037e-16	8.74869e-16	WP_057279602.1	glycoside hydrolase family 97 protein [Phocaeicola vulgatus]	15.5375	up	PUL42	GH97
FHJOOPKJ_01944	38.6667	16.3333	3.8	1.28	1.55243	3.09403e-08	6.44575e-08	WP_005840318.1	MULTISPECIES: corrinoid protein [Bacteroidaceae]	7.50948	up
FHJOOPKJ_03458	229.333	98	53.11	16.7667	1.54937	1.03029e-25	4.22809e-25	WP_032944904.1	MULTISPECIES: glycosyltransferase family 8 protein [Phocaeicola]	24.987	up
FHJOOPKJ_00763	230.333	97	37.47	12.5	1.54817	2.36818e-16	7.17872e-16	WP_016271187.1	acyltransferase [Phocaeicola vulgatus]	15.6256	up
FHJOOPKJ_01578	647	277	136.34	44.84	1.54815	1.83333e-54	1.48812e-53	WP_005842556.1	MULTISPECIES: tetratricopeptide repeat protein [Bacteroidaceae]	53.7368	up
FHJOOPKJ_01269	176.333	75.6667	36.1433	11.9567	1.54601	1.58769e-25	6.47221e-25	WP_016271135.1	GntR family transcriptional regulator [Phocaeicola vulgatus]	24.7992	up
FHJOOPKJ_02728	105	45	18.4767	6.05333	1.54558	4.50965e-19	1.50335e-18	WP_057099164.1	MULTISPECIES: hypothetical protein [Phocaeicola]	18.3459	up
FHJOOPKJ_03049	119	51	10.6467	3.57667	1.54179	1.14891e-20	4.03877e-20	WP_118236250.1	9-O-acetylesterase [Phocaeicola vulgatus]	19.9397	up	PUL42	Unk
FHJOOPKJ_00893	230	98.6667	44.8333	14.93	1.54102	9.63142e-27	4.09419e-26	EOS02433.1	tRNA-specific 2-thiouridylase mnmA 2 [Phocaeicola vulgatus dnLKV7]	26.0163	up
FHJOOPKJ_01421	108.667	46.6667	30.69	10.1067	1.54059	2.94816e-14	8.24991e-14	WP_117700224.1	LytTR family DNA-binding domain-containing protein [Phocaeicola vulgatus]	13.5304	up
FHJOOPKJ_03337	931	401.333	48.48	16.27	1.53652	9.59107e-68	9.30511e-67	WP_117678266.1	efflux RND transporter permease subunit [Phocaeicola vulgatus]	67.0181	up
FHJOOPKJ_04179	39.3333	17	70.8867	22.1167	1.53622	5.61753e-06	1.02918e-05	WP_117515630.1	MULTISPECIES: DUF5712 family protein [Bacteroidales]	5.25045	up
FHJOOPKJ_02579	2528.33	1092.33	266.353	89.4133	1.53606	3.38282e-100	4.83993e-99	KAB6462696.1	flotillin family protein [Phocaeicola vulgatus]	99.4707	up
FHJOOPKJ_02693	7525	3269.33	552.777	185.123	1.53488	7.02028e-88	8.60452e-87	WP_016270736.1	glycoside hydrolase family 20 protein [Phocaeicola vulgatus]	87.1536	up
FHJOOPKJ_01700	308.667	133.667	39.5433	13.2467	1.53095	3.70051e-39	2.14957e-38	WP_117700210.1	RagB/SusD family nutrient uptake outer membrane protein [Phocaeicola vulgatus]	38.4317	up	PUL25	susD
FHJOOPKJ_02756	390.333	169.667	113	37.62	1.5295	1.69881e-30	7.87706e-30	WP_229095010.1	helix-turn-helix domain-containing protein [Phocaeicola vulgatus]	29.7699	up
FHJOOPKJ_01129	213.333	92.6667	62.0133	20.71	1.52449	8.21088e-29	3.66846e-28	ALK84541.1	L-ribulose-5-phosphate 4-epimerase [Phocaeicola vulgatus]	28.0856	up
FHJOOPKJ_00244	2268	987	292.793	98.6233	1.52394	5.27072e-103	7.81469e-102	WP_117696489.1	Gfo/Idh/MocA family oxidoreductase [Phocaeicola vulgatus]	102.278	up
FHJOOPKJ_04043	4669.67	2035	654.4	221.207	1.52179	1.69818e-131	3.23535e-130	WP_005839525.1	MULTISPECIES: V-type ATP synthase subunit B [Bacteroidaceae]	130.77	up
FHJOOPKJ_01915	181.667	78	18.8033	6.31333	1.52175	4.4594e-06	8.23981e-06	WP_008667141.1	MULTISPECIES: DUF3987 domain-containing protein [Bacteroidaceae]	5.35072	up
FHJOOPKJ_04042	8915.33	3885.67	896.45	303.047	1.52051	1.82864e-138	3.75637e-137	WP_012055763.1	V-type ATP synthase subunit A [Phocaeicola vulgatus]	137.738	up
FHJOOPKJ_03574	27.6667	12	1.97667	0.666667	1.51686	2.1624e-06	4.06085e-06	WP_172769900.1	ABC transporter permease [Phocaeicola vulgatus]	5.66506	up
FHJOOPKJ_03636	281	123.333	115.96	38.6767	1.51467	3.07415e-33	1.54001e-32	WP_074558177.1	HK97 family phage prohead protease [Bacteroides ovatus]	32.5123	up
FHJOOPKJ_00741	319.333	140	170.48	56.8867	1.51105	1.00782e-31	4.86319e-31	WP_005841977.1	MULTISPECIES: RNA polymerase sigma factor [Bacteroidaceae]	30.9966	up
FHJOOPKJ_01825	713.667	317	35.6167	12.2233	1.50707	1.44234e-34	7.49082e-34	WP_005845769.1	MULTISPECIES: TonB-dependent receptor [Bacteroidaceae]	33.8409	up	PUL28	susC
FHJOOPKJ_02943	988	437	164.037	55.9467	1.50275	2.00345e-47	1.43881e-46	WP_016270379.1	cytochrome d ubiquinol oxidase subunit II [Phocaeicola vulgatus]	46.6982	up
FHJOOPKJ_01165	127.667	56.3333	17.8033	6.09333	1.49902	7.90196e-17	2.43754e-16	WP_005843240.1	MULTISPECIES: glycoside hydrolase family 28 protein [Bacteroidaceae]	16.1023	up
FHJOOPKJ_00215	1089.67	485	133.097	46.07	1.49874	1.1019e-47	7.96012e-47	WP_005845177.1	MULTISPECIES: HAMP domain-containing histidine kinase [Bacteroidaceae]	46.9579	up
FHJOOPKJ_01688	29	12.6667	1.49	0.52	1.498	7.55303e-06	1.3681e-05	WP_117596027.1	MULTISPECIES: carboxypeptidase regulatory-like domain-containing protein [Bacteroidaceae]	5.12188	up
FHJOOPKJ_04240	16.6667	7.33333	17.9733	5.74667	1.49462	0.000194792	0.000325273	WP_132140480.1	hypothetical protein [Phocaeicola dorei]	3.71043	up
FHJOOPKJ_03035	32.3333	14.3333	2.48	0.853333	1.48876	2.42671e-07	4.81544e-07	WP_057279604.1	GH92 family glycosyl hydrolase [Phocaeicola vulgatus]	6.61498	up	PUL42	GH92
FHJOOPKJ_02825	299	133.667	67.3933	23.16	1.48862	1.24823e-32	6.17733e-32	WP_011109634.1	MULTISPECIES: DUF5119 domain-containing protein [Bacteroidaceae]	31.9037	up
FHJOOPKJ_03088	20.3333	9	7.38	2.53333	1.48723	8.6096e-05	0.000147313	WP_005845475.1	MULTISPECIES: hypothetical protein [Bacteroidaceae]	4.06502	up
FHJOOPKJ_02760	372	166.667	270.55	91.3	1.48389	2.76834e-38	1.57573e-37	WP_057250751.1	MULTISPECIES: hypothetical protein [Bacteroidaceae]	37.5578	up
FHJOOPKJ_03191	399	179.667	72.42	24.9233	1.48201	2.88465e-34	1.48764e-33	WP_005839104.1	MULTISPECIES: CapA family protein [Bacteroidaceae]	33.5399	up
FHJOOPKJ_02758	1341.33	604	139.6	48.61	1.47737	2.42281e-67	2.33823e-66	WP_117925854.1	DEAD/DEAH box helicase [Phocaeicola vulgatus]	66.6157	up
FHJOOPKJ_00257	28	12.6667	5.52	1.86	1.47399	1.67381e-05	2.97899e-05	WP_005842348.1	MULTISPECIES: GRP family sugar transporter [Bacteroidaceae]	4.77629	up
FHJOOPKJ_03682	422.667	190.667	107.227	37.53	1.47192	1.29006e-36	6.9964e-36	WP_118327462.1	alpha/beta hydrolase [Phocaeicola vulgatus]	35.8894	up
FHJOOPKJ_03026	1925.33	864.333	152.94	53.7133	1.47129	5.12488e-77	5.44629e-76	EET15964.2	Alpha-N-acetylglucosaminidase (NAGLU) [Bacteroides sp. 4_3_47FAA]	76.2903	up	PUL41	GH89
FHJOOPKJ_04241	13.3333	6	15.5933	4.89	1.47002	0.00158724	0.00242571	WP_220432081.1	hypothetical protein, partial [Phocaeicola vulgatus]	2.79936	up
FHJOOPKJ_03473	546.333	247.667	102.647	35.8433	1.46449	1.95307e-39	1.14903e-38	WP_117700063.1	mannose-1-phosphate guanylyltransferase [Phocaeicola vulgatus]	38.7093	up
FHJOOPKJ_02731	34.6667	15.6667	16.5067	5.7	1.46082	2.95766e-07	5.84694e-07	WP_117925848.1	hypothetical protein [Phocaeicola vulgatus]	6.52905	up
FHJOOPKJ_01131	638.333	289.333	64.5033	22.7767	1.46061	1.263e-44	8.49006e-44	WP_117892427.1	sodium:solute symporter [Phocaeicola vulgatus]	43.8986	up
FHJOOPKJ_03317	73	33.3333	20.1	7.01333	1.45447	5.4191e-13	1.43456e-12	WP_038607916.1	TonB-dependent receptor [Phocaeicola dorei]	12.2661	up	PUL47	susC
FHJOOPKJ_03656	782	360.333	31.0767	11.0233	1.45132	1.7908e-40	1.07419e-39	WP_130080378.1	response regulator [Bacteroides uniformis]	39.747	up	PUL50	Unk
FHJOOPKJ_00153	2154.33	989	295.84	105.297	1.44576	6.31454e-97	8.63144e-96	WP_005845584.1	MULTISPECIES: NADP-specific glutamate dehydrogenase [Bacteroidaceae]	96.1997	up
FHJOOPKJ_01787	4470.67	2053.33	1163.54	411.857	1.44522	1.4875e-105	2.25084e-104	WP_005841025.1	MULTISPECIES: rhamnulose-1-phosphate aldolase [Bacteroidaceae]	104.828	up
FHJOOPKJ_03932	22	10	13.1567	4.69	1.44197	0.000174845	0.000292895	WP_005851265.1	MULTISPECIES: S26 family signal peptidase [Bacteroidaceae]	3.75735	up
FHJOOPKJ_04192	50.6667	23.3333	37.44	13.0433	1.44103	1.18342e-06	2.25931e-06	KAB6590621.1	hypothetical protein GAZ81_19210 [Phocaeicola vulgatus]	5.92686	up
FHJOOPKJ_03474	185	85	131.51	46.31	1.44053	7.16567e-24	2.77641e-23	WP_008670007.1	MULTISPECIES: hypothetical protein [Bacteroidaceae]	23.1447	up
FHJOOPKJ_02078	95	44	20.5233	7.29333	1.43749	5.10801e-15	1.46965e-14	WP_117694127.1	FecR family protein [Phocaeicola vulgatus]	14.2917	up
FHJOOPKJ_01102	112.333	52	209.49	70.75	1.43603	8.0954e-18	2.59972e-17	WP_005846148.1	MULTISPECIES: thioredoxin family protein [Bacteroidaceae]	17.0918	up
FHJOOPKJ_02075	140.667	65	9.69333	3.48	1.43576	2.68039e-16	8.10509e-16	WP_074783423.1	DUF4982 domain-containing protein [Phocaeicola vulgatus]	15.5718	up	PUL31	GH2
FHJOOPKJ_01701	614	285	31.2367	11.2933	1.4319	4.89287e-45	3.30719e-44	WP_117700212.1	SusC/RagA family TonB-linked outer membrane protein [Phocaeicola vulgatus]	44.3104	up	PUL25	susC
FHJOOPKJ_03558	2428	1127.33	185.913	66.95	1.42942	1.36896e-92	1.79134e-91	EFV68748.1	glycoside hydrolase family 92 [Bacteroides sp. 3_1_40A]	91.8636	up
FHJOOPKJ_00319	697	325.667	709.957	244.777	1.42887	1.61142e-32	7.93198e-32	WP_195258149.1	phage holin family protein [Phocaeicola vulgatus]	31.7928	up
FHJOOPKJ_01365	8672.67	4031	1985.68	708.527	1.42835	4.20563e-119	7.19261e-118	WP_118413836.1	peptidoglycan DD-metalloendopeptidase family protein [Phocaeicola vulgatus]	118.376	up
FHJOOPKJ_03614	7.33333	3.33333	17.7367	5.77333	1.42734	0.0226433	0.0307004	OKZ35507.1	hypothetical protein BHV79_06470 [Bacteroides uniformis]	1.64506	none
FHJOOPKJ_03388	685	317	80.6567	30.3467	1.42628	2.48112e-27	1.07204e-26	WP_117974677.1	MULTISPECIES: fimbrillin family protein [Bacteroidales]	26.6054	up
FHJOOPKJ_04163	87.3333	41	70.2767	24.3733	1.41964	1.3674e-09	3.07143e-09	WP_117889501.1	hypothetical protein [Phocaeicola vulgatus]	8.8641	up
FHJOOPKJ_00643	548.333	256	200.22	71.9233	1.41854	4.07835e-40	2.41873e-39	ALK82900.1	RNA Polymerase Sigma-24 Subunit ECF Subfamily [Phocaeicola vulgatus]	39.3895	up
FHJOOPKJ_01657	246.333	114.667	28.6233	10.3067	1.41835	6.92098e-16	2.0673e-15	WP_117699825.1	DUF3874 domain-containing protein [Phocaeicola vulgatus]	15.1598	up
FHJOOPKJ_02761	557.333	261.667	143.43	51.74	1.41742	3.93541e-40	2.33772e-39	WP_057250749.1	MULTISPECIES: hypothetical protein [Phocaeicola]	39.405	up
FHJOOPKJ_04162	164.333	77	130.24	45.7833	1.41673	2.44401e-18	7.98103e-18	OKZ35495.1	structural protein P5 [Bacteroides uniformis]	17.6119	up
FHJOOPKJ_00896	4099.67	1933	7051.45	2438.02	1.4138	7.888e-66	7.36146e-65	WP_005844385.1	MULTISPECIES: HU family DNA-binding protein [Bacteroidaceae]	65.103	up
FHJOOPKJ_03144	232.667	110	73.9533	26.4767	1.40689	1.90529e-28	8.46106e-28	WP_057280166.1	MULTISPECIES: pirin family protein [Bacteroidaceae]	27.72	up
FHJOOPKJ_00266	427	201.667	16.0767	5.94667	1.40323	6.34015e-35	3.33516e-34	WP_110506437.1	response regulator [Bacteroides sp. NMBE5]	34.1979	up
FHJOOPKJ_02687	51.6667	24.3333	6.2	2.28333	1.40199	4.15855e-09	9.08556e-09	WP_005840429.1	MULTISPECIES: SusD family outer membrane lipoprotein NanU [Bacteroidaceae]	8.38106	up
FHJOOPKJ_01851	348	165	20.17	7.46667	1.39639	5.07851e-35	2.68686e-34	WP_227235791.1	beta-galactosidase [Phocaeicola dorei]	34.2943	up	PUL30	GH2
FHJOOPKJ_02907	46	22	10.3767	3.73667	1.38891	2.54086e-08	5.31744e-08	WP_117616207.1	glycyl-radical enzyme activating protein [Phocaeicola vulgatus]	7.59502	up
FHJOOPKJ_01796	1301.33	624.333	361.7	132.67	1.38239	1.17073e-72	1.18589e-71	WP_005841046.1	MULTISPECIES: pyrroline-5-carboxylate reductase [Bacteroidaceae]	71.9315	up
FHJOOPKJ_02831	980.333	469.333	399.463	146.71	1.38198	4.46195e-42	2.83851e-41	WP_117699422.1	DUF4476 domain-containing protein [Phocaeicola vulgatus]	41.3505	up
FHJOOPKJ_02730	81.3333	39.3333	50.4	18.2267	1.3817	2.97622e-09	6.56876e-09	WP_051926262.1	MULTISPECIES: hypothetical protein [Bacteroidaceae]	8.52634	up
FHJOOPKJ_03734	1557.67	751.333	114.527	42.7433	1.37901	3.82757e-74	3.93127e-73	WP_118121585.1	glycoside hydrolase family 20 protein [Phocaeicola vulgatus]	73.4171	up
FHJOOPKJ_02908	325	156.333	22.77	8.51333	1.37723	8.76035e-31	4.08261e-30	WP_117700204.1	glycyl radical protein [Phocaeicola vulgatus]	30.0575	up
FHJOOPKJ_03572	21	10.3333	1.53333	0.56	1.36694	0.00132538	0.00204594	WP_117885311.1	ABC transporter permease [Phocaeicola vulgatus]	2.87766	up
FHJOOPKJ_02764	142	69	126.917	45.96	1.36653	6.1757e-19	2.04761e-18	WP_051926267.1	MULTISPECIES: LuxR C-terminal-related transcriptional regulator [Bacteroidaceae]	18.2093	up
FHJOOPKJ_04074	474.667	230.667	190.05	70.4233	1.36568	4.71992e-35	2.50435e-34	WP_016271639.1	nitroreductase family protein [Phocaeicola vulgatus]	34.3261	up
FHJOOPKJ_02297	552.667	267	1969.55	718.02	1.36357	6.51287e-22	2.38287e-21	WP_005851190.1	MULTISPECIES: hypothetical protein [Bacteroidaceae]	21.1862	up
FHJOOPKJ_02762	1019	497	218.773	82.2033	1.35958	2.90921e-67	2.78572e-66	WP_038609521.1	MULTISPECIES: ATP-binding protein [Bacteroidaceae]	66.5362	up
FHJOOPKJ_03386	94.6667	46	140.683	51.11	1.35955	7.66215e-13	2.01673e-12	HBX18106.1	hypothetical protein [Barnesiella sp.]	12.1156	up
FHJOOPKJ_03184	17.3333	8.33333	1.43667	0.553333	1.35834	0.000725902	0.00114802	EFV67414.1	hypothetical protein HMPREF9011_02114 [Bacteroides sp. 3_1_40A]	3.13912	up	PUL44	GH97
FHJOOPKJ_03464	80.6667	39.3333	36.3333	13.45	1.35776	2.9205e-12	7.49385e-12	WP_117700061.1	putative colanic acid biosynthesis acetyltransferase [Phocaeicola vulgatus]	11.5345	up
FHJOOPKJ_03391	222.333	108.667	55.0667	20.39	1.35532	1.24465e-21	4.50449e-21	WP_122339071.1	MULTISPECIES: fimbrillin family protein [Parabacteroides]	20.905	up
FHJOOPKJ_03040	2307.33	1127	93.0367	35.6933	1.35416	1.48118e-85	1.77984e-84	WP_057279601.1	response regulator [Phocaeicola vulgatus]	84.8294	up	PUL42	Unk
FHJOOPKJ_02759	702	349	255.83	96.09	1.34513	5.44931e-31	2.5821e-30	WP_057250753.1	MULTISPECIES: hypothetical protein [Bacteroidaceae]	30.2637	up
FHJOOPKJ_03722	21	10.3333	53.36	18.5833	1.34494	0.00347991	0.00514708	WP_005847732.1	MULTISPECIES: hypothetical protein [Bacteroidaceae]	2.45843	up
FHJOOPKJ_03827	57.6667	28.3333	9.63333	3.68333	1.34473	1.45155e-09	3.25051e-09	WP_118170710.1	hypothetical protein [Phocaeicola vulgatus]	8.83817	up
FHJOOPKJ_00952	16386.7	8144.67	1588.46	608.107	1.34165	2.18446e-56	1.80907e-55	WP_005845821.1	MULTISPECIES: DUF349 domain-containing protein [Bacteroidaceae]	55.6607	up
FHJOOPKJ_02741	29.6667	14.6667	84.4933	30.3633	1.33587	6.15236e-05	0.000106407	WP_005847622.1	MULTISPECIES: hypothetical protein [Bacteroidaceae]	4.21096	up
FHJOOPKJ_03316	99.3333	49	7.63667	2.99	1.33476	4.23276e-12	1.07485e-11	WP_227191488.1	MULTISPECIES: TonB-dependent receptor [Phocaeicola]	11.3734	up	PUL47	susC
FHJOOPKJ_00640	73.3333	36.3333	31.1	11.7267	1.33188	4.43132e-08	9.16421e-08	WP_022508336.1	MULTISPECIES: RNA polymerase sigma-70 factor [Bacteroidaceae]	7.35347	up
FHJOOPKJ_01557	151.333	74.6667	244.21	91.33	1.32925	1.72953e-14	4.88064e-14	WP_005839036.1	MULTISPECIES: N-acetyltransferase [Bacteroidaceae]	13.7621	up
FHJOOPKJ_03770	207	103.333	28.68	10.9867	1.32769	1.7845e-21	6.42036e-21	WP_005842890.1	MULTISPECIES: alpha-L-fucosidase [Bacteroidaceae]	20.7485	up	PUL51	GH29
FHJOOPKJ_02923	495.333	247.667	477.923	178.683	1.3227	3.61082e-38	2.04261e-37	WP_005847981.1	MULTISPECIES: hypothetical protein [Bacteroidaceae]	37.4424	up
FHJOOPKJ_02942	89	44.3333	28.31	10.9767	1.31871	1.56103e-11	3.87831e-11	WP_016270378.1	6-phosphogluconolactonase [Phocaeicola vulgatus]	10.8066	up
FHJOOPKJ_02222	24	12.3333	5.71333	2.14	1.31649	0.00156794	0.00239722	WP_151852245.1	hypothetical protein [Bacteroides uniformis]	2.80467	up
FHJOOPKJ_01134	6381	3212	874.977	340.777	1.31365	1.24564e-81	1.4093e-80	WP_005846203.1	MULTISPECIES: MFS transporter [Bacteroidaceae]	80.9046	up
FHJOOPKJ_03098	794.333	401	431.997	165.63	1.31203	2.79159e-51	2.16099e-50	WP_005845496.1	MULTISPECIES: RNA polymerase sigma factor [Bacteroidaceae]	50.5541	up
FHJOOPKJ_02766	43	21.6667	138.45	51.47	1.31115	1.19996e-06	2.2897e-06	OUO08543.1	hypothetical protein B5F95_11455 [Phocaeicola dorei]	5.92083	up
FHJOOPKJ_03446	123.667	62.3333	16.1733	6.32667	1.30891	5.8939e-16	1.76337e-15	WP_032944918.1	MULTISPECIES: undecaprenyl-phosphate glucose phosphotransferase [Bacteroidaceae]	15.2296	up
FHJOOPKJ_03459	137	69.6667	20.2067	7.11	1.30758	1.7435e-08	3.6844e-08	WP_117700057.1	MULTISPECIES: oligosaccharide flippase family protein [Phocaeicola]	7.75858	up
FHJOOPKJ_01824	306.333	155.667	26.68	10.4367	1.30481	2.37613e-26	9.95105e-26	WP_005845767.1	MULTISPECIES: RagB/SusD family nutrient uptake outer membrane protein [Bacteroidaceae]	25.6241	up	PUL28	susD
FHJOOPKJ_02902	775.333	393.333	417.957	161.24	1.30302	2.15507e-45	1.47017e-44	WP_005845363.1	MULTISPECIES: 5-(carboxyamino)imidazole ribonucleotide mutase [Bacteroidaceae]	44.6665	up
FHJOOPKJ_02504	4489	2281.33	706.49	277.073	1.30195	2.47088e-98	3.40278e-97	WP_038609600.1	MULTISPECIES: sirohydrochlorin cobaltochelatase [Bacteroidaceae]	97.6071	up
FHJOOPKJ_02686	111	56.3333	5.66	2.23	1.30084	1.53764e-15	4.5195e-15	EET14579.2	TonB-linked outer membrane protein, SusC/RagA family [Bacteroides sp. 4_3_47FAA]	14.8131	up
FHJOOPKJ_02944	1859.67	938.667	225.407	88.9133	1.30045	1.16361e-38	6.70628e-38	WP_005843401.1	MULTISPECIES: cytochrome ubiquinol oxidase subunit I [Bacteroidaceae]	37.9342	up
FHJOOPKJ_03389	670	340	82.7467	32.6467	1.29878	1.10952e-30	5.15765e-30	WP_075965650.1	MULTISPECIES: fimbrillin family protein [Parabacteroides]	29.9549	up
FHJOOPKJ_00029	819.667	419.667	75.7367	30.0367	1.29043	1.54128e-48	1.13345e-47	WP_008670267.1	MULTISPECIES: M56 family metallopeptidase [Bacteroidaceae]	47.8121	up	PUL2	susC
FHJOOPKJ_03385	264.667	135.667	94.78	37.0633	1.28858	1.78077e-24	6.99561e-24	WP_117808931.1	MULTISPECIES: DUF2589 domain-containing protein [Bacteroidaceae]	23.7494	up
FHJOOPKJ_03050	454.667	233.333	103.53	41.02	1.28472	2.24497e-28	9.95747e-28	WP_118236249.1	AraC family transcriptional regulator [Phocaeicola vulgatus]	27.6488	up	PUL42	Unk
FHJOOPKJ_03390	620.667	318	76.8733	30.6833	1.28439	4.40875e-38	2.48254e-37	WP_122339069.1	MULTISPECIES: fimbrillin family protein [Bacteroidales]	37.3557	up
FHJOOPKJ_01211	61.6667	31.6667	7.67667	3.02333	1.28375	2.14903e-09	4.78618e-09	WP_005848097.1	MULTISPECIES: RagB/SusD family nutrient uptake outer membrane protein [Bacteroidaceae]	8.66776	up	PUL16	susD
FHJOOPKJ_02832	778.333	399.333	266.713	105.27	1.28311	9.58072e-48	6.98974e-47	WP_117885588.1	DUF4476 domain-containing protein [Phocaeicola vulgatus]	47.0186	up
FHJOOPKJ_03908	198.333	102.333	90.89	35.2333	1.28295	7.07083e-19	2.34018e-18	WP_005847321.1	MULTISPECIES: DUF4251 domain-containing protein [Bacteroidaceae]	18.1505	up
FHJOOPKJ_01577	1263.67	649.667	97.9567	39.08	1.28144	4.10739e-34	2.1064e-33	WP_227194062.1	beta-N-acetylglucosaminidase domain-containing protein [Phocaeicola vulgatus]	33.3864	up
FHJOOPKJ_04256	14.3333	7.33333	27.2567	10.0367	1.27945	0.00259366	0.00387994	WP_117697712.1	hypothetical protein [Phocaeicola vulgatus]	2.58609	up
FHJOOPKJ_03573	37.3333	19.3333	2.67	1.06333	1.27395	2.57938e-06	4.8193e-06	WP_117885309.1	FtsX-like permease family protein [Phocaeicola vulgatus]	5.58848	up
FHJOOPKJ_02915	664.667	342.333	2914.87	1127.28	1.2708	7.85363e-18	2.52428e-17	ALK84160.1	Rubredoxin [Phocaeicola vulgatus]	17.1049	up
FHJOOPKJ_00298	2543	1314.67	710.697	285.043	1.26327	3.08245e-27	1.32719e-26	WP_012056009.1	MULTISPECIES: tryptophan synthase subunit alpha [Phocaeicola]	26.5111	up
FHJOOPKJ_02056	884.333	461	480.803	190.043	1.26162	1.18363e-54	9.62875e-54	ALK86715.1	Thioredoxin-like protein yneN [Phocaeicola vulgatus]	53.9268	up
FHJOOPKJ_01776	1186.67	622	170.597	68.7633	1.25936	4.81955e-43	3.11998e-42	WP_005840985.1	MULTISPECIES: MFS transporter [Bacteroidaceae]	42.317	up	PUL26	Unk
FHJOOPKJ_03868	2050.33	1067	297.773	120.247	1.2583	7.25614e-44	4.75594e-43	WP_005844757.1	MULTISPECIES: phosphopyruvate hydratase [Bacteroidaceae]	43.1393	up
FHJOOPKJ_01785	303.667	159	67.1033	27.1433	1.25539	5.14892e-23	1.96193e-22	WP_005841013.1	MULTISPECIES: AraC family transcriptional regulator [Bacteroidaceae]	22.2883	up
FHJOOPKJ_01855	49.6667	26	4.66	1.88	1.2551	6.83241e-08	1.40038e-07	WP_117885233.1	hypothetical protein [Phocaeicola vulgatus]	7.16543	up	PUL30	CE1
FHJOOPKJ_01018	263.333	138.333	53.31	21.7733	1.25428	3.09182e-25	1.25482e-24	WP_008667743.1	MULTISPECIES: hypothetical protein [Bacteroidaceae]	24.5098	up
FHJOOPKJ_03937	838.667	442.333	49.3133	20.17	1.24718	1.65666e-46	1.16473e-45	WP_172774709.1	fimbrillin family protein [Phocaeicola vulgatus]	45.7808	up
FHJOOPKJ_00026	959	508.667	78.0367	32.01	1.24027	2.63183e-48	1.92391e-47	WP_117699504.1	TlpA family protein disulfide reductase [Phocaeicola vulgatus]	47.5797	up
FHJOOPKJ_01685	198.667	105.333	29.4267	12.1033	1.23726	1.29896e-16	3.99019e-16	WP_038608451.1	MULTISPECIES: DUF2851 family protein [Bacteroidaceae]	15.8864	up
FHJOOPKJ_02763	68.6667	36.3333	98.3267	38.8	1.2351	3.22279e-09	7.07898e-09	WP_051926266.1	MULTISPECIES: hypothetical protein [Bacteroidaceae]	8.49177	up
FHJOOPKJ_03336	749.667	399	90.4167	37.52	1.23035	2.77711e-46	1.94875e-45	WP_117700127.1	TolC family protein [Phocaeicola vulgatus]	45.5564	up
FHJOOPKJ_00894	205.333	109.667	125.107	50.91	1.22612	5.51238e-16	1.65057e-15	WP_117700184.1	virulence RhuM family protein [Phocaeicola vulgatus]	15.2587	up
FHJOOPKJ_03277	504.333	270	169.82	70.1433	1.21659	6.43617e-25	2.58079e-24	WP_175324231.1	tRNA (5-methylaminomethyl-2-thiouridine)(34)-methyltransferase MnmD [Phocaeicola vulgatus]	24.1914	up
FHJOOPKJ_01164	181	96.6667	25.71	10.7867	1.21423	2.63234e-13	7.03935e-13	WP_005843242.1	MULTISPECIES: hypothetical protein [Bacteroidaceae]	12.5797	up
FHJOOPKJ_03835	54	29	2.92667	1.24333	1.21214	3.67655e-07	7.21381e-07	WP_008670390.1	MULTISPECIES: TonB-dependent receptor [Bacteroidaceae]	6.43456	up	PUL52	susC
FHJOOPKJ_03024	152.333	82.6667	21.34	8.95667	1.20716	7.00654e-14	1.92118e-13	WP_005839834.1	MULTISPECIES: TolC family protein [Bacteroidaceae]	13.1545	up
FHJOOPKJ_00028	2570	1395.33	351.3	147.193	1.20416	5.00091e-51	3.82294e-50	WP_117699503.1	tetratricopeptide repeat protein [Phocaeicola vulgatus]	50.301	up
FHJOOPKJ_01135	2285	1249	401.19	168.74	1.19858	1.22214e-56	1.0167e-55	WP_008671071.1	MULTISPECIES: galactose mutarotase [Bacteroidaceae]	55.9129	up
FHJOOPKJ_02690	167	91.3333	58.2267	24.35	1.19656	2.97381e-15	8.61677e-15	WP_005840423.1	MULTISPECIES: GDSL-type esterase/lipase family protein [Bacteroidaceae]	14.5267	up
FHJOOPKJ_01579	125.333	68.3333	24.9433	10.58	1.19502	1.80515e-13	4.87338e-13	WP_115648905.1	AI-2E family transporter [Phocaeicola vulgatus]	12.7435	up
FHJOOPKJ_04257	8.66667	4.66667	18.4033	7.26	1.19322	0.0208477	0.0283599	WP_117697710.1	pyocin knob domain-containing protein [Phocaeicola vulgatus]	1.68094	none
FHJOOPKJ_03858	43.3333	23.6667	48.2267	19.7233	1.18978	4.93227e-06	9.07252e-06	WP_005846452.1	MULTISPECIES: DUF1622 domain-containing protein [Bacteroidaceae]	5.30695	up
FHJOOPKJ_00151	1237	677.667	778.637	325.687	1.18965	2.61067e-56	2.15234e-55	WP_117694850.1	calycin-like domain-containing protein [Phocaeicola vulgatus]	55.5832	up
FHJOOPKJ_01821	35878.7	19776	1730.19	741.43	1.18811	1.45227e-85	1.75082e-84	WP_008667530.1	MULTISPECIES: SusC/RagA family TonB-linked outer membrane protein [Bacteroidaceae]	84.838	up	PUL28	susC
FHJOOPKJ_01474	714.667	393	387.62	162.763	1.18279	6.96457e-41	4.23985e-40	WP_005851502.1	MULTISPECIES: thiol peroxidase [Bacteroidaceae]	40.1571	up
FHJOOPKJ_03096	153.667	84.6667	91.6433	38.7467	1.17882	7.31681e-12	1.8377e-11	WP_005845492.1	MULTISPECIES: CYTH domain-containing protein [Bacteroidaceae]	11.1357	up
FHJOOPKJ_01112	26	14.3333	3.20667	1.4	1.17687	0.00261288	0.0039071	WP_117699415.1	MAC/perforin domain-containing protein [Phocaeicola vulgatus]	2.58288	up
FHJOOPKJ_00604	3937.33	2183	271.62	116.477	1.17591	5.52175e-83	6.40488e-82	WP_196026711.1	alpha/beta fold hydrolase [Phocaeicola vulgatus]	82.2579	up
FHJOOPKJ_03124	317	176	46.33	19.8967	1.17148	6.29248e-21	2.22475e-20	WP_005848180.1	MULTISPECIES: MFS transporter [Phocaeicola]	20.2012	up
FHJOOPKJ_01534	8492.67	4720.67	547.577	236.703	1.16905	4.98586e-80	5.52199e-79	WP_117699937.1	transglutaminase domain-containing protein [Phocaeicola vulgatus]	79.3023	up
FHJOOPKJ_01861	139.333	77.6667	9.34333	4.03667	1.1668	1.33319e-15	3.92484e-15	WP_038611870.1	MULTISPECIES: membrane protein [Bacteroidaceae]	14.8751	up	PUL30	GH147
FHJOOPKJ_00184	1095	612.333	104.933	45.9667	1.16552	4.42543e-41	2.71658e-40	WP_117696039.1	tetratricopeptide repeat protein [Phocaeicola vulgatus]	40.354	up
FHJOOPKJ_00299	1478	822	589.55	253.037	1.16064	7.88358e-23	2.96704e-22	WP_032945284.1	phosphoribosylanthranilate isomerase [Phocaeicola vulgatus]	22.1033	up
FHJOOPKJ_01489	40	22.3333	113.36	46.72	1.15992	4.23629e-06	7.84727e-06	BDC07796.1	hypothetical protein GAIMETA21S03_36790 [Phocaeicola vulgatus]	5.37301	up
FHJOOPKJ_03126	2973.33	1656.33	206.713	90.1167	1.15921	1.74552e-27	7.56873e-27	WP_117700051.1	DUF4922 domain-containing protein [Phocaeicola vulgatus]	26.7581	up
FHJOOPKJ_01539	15	8.33333	3.36	1.44333	1.15861	0.00669531	0.00963926	WP_117699939.1	DMT family transporter [Phocaeicola vulgatus]	2.17423	up
FHJOOPKJ_03588	59.6667	33.3333	11.2667	4.89667	1.15828	1.04246e-06	2.00164e-06	WP_005811475.1	MULTISPECIES: hypothetical protein [Bacteroidaceae]	5.98194	up
FHJOOPKJ_00317	15646.3	8785	792.073	344.847	1.15798	2.14388e-85	2.55943e-84	WP_117693867.1	S41 family peptidase [Phocaeicola vulgatus]	84.6688	up
FHJOOPKJ_01512	640	356	59.5733	25.5367	1.15797	1.58982e-19	5.36803e-19	WP_207817573.1	toprim domain-containing protein [Bacteroides sp. AF32-15BH]	18.7987	up
FHJOOPKJ_01959	3437	1926	449.633	194.517	1.1579	6.47967e-62	5.76895e-61	WP_005838636.1	MULTISPECIES: MFS transporter [Bacteroidaceae]	61.1884	up
FHJOOPKJ_02112	1186.67	667.667	148.963	64.5667	1.15677	1.74715e-47	1.2572e-46	WP_117699645.1	tagaturonate reductase [Phocaeicola vulgatus]	46.7577	up
FHJOOPKJ_02522	1499	841.333	581.593	249.783	1.15326	2.36129e-53	1.87526e-52	WP_005852751.1	MULTISPECIES: superoxide dismutase [Bacteroidaceae]	52.6269	up
FHJOOPKJ_02826	225.333	127	34.4933	15.1133	1.14925	1.31704e-09	2.96013e-09	WP_032849859.1	MULTISPECIES: DUF3575 domain-containing protein [Bacteroidales]	8.8804	up
FHJOOPKJ_03319	23.6667	13.3333	11.4367	4.9	1.14733	0.00358947	0.0053006	ALK85150.1	RNA Polymerase Sigma-24 Subunit ECF Subfamily [Phocaeicola vulgatus]	2.44497	up	PUL47	Unk
FHJOOPKJ_01556	2018	1142.33	288.25	125.8	1.14632	1.81035e-60	1.5925e-59	WP_005839040.1	MULTISPECIES: L-serine ammonia-lyase, iron-sulfur-dependent, subunit alpha [Bacteroidaceae]	59.7422	up
FHJOOPKJ_01132	184.667	104.333	30.67	13.3833	1.14182	5.06227e-16	1.51703e-15	WP_016270085.1	galactose mutarotase [Phocaeicola vulgatus]	15.2957	up
FHJOOPKJ_01364	5575	3165.67	3448.35	1488.47	1.14107	9.10161e-59	7.91173e-58	WP_005840793.1	MULTISPECIES: nucleoside-diphosphate kinase [Bacteroidaceae]	58.0409	up
FHJOOPKJ_00055	965.667	548.333	57.5967	25.6667	1.13661	2.53805e-44	1.68455e-43	WP_182291965.1	helix-turn-helix domain-containing protein [Phocaeicola vulgatus]	43.5955	up
FHJOOPKJ_03435	2847.33	1625	450.923	198.027	1.13616	7.00919e-47	4.99473e-46	WP_005851616.1	MULTISPECIES: aminopeptidase [Bacteroidaceae]	46.1543	up
FHJOOPKJ_03946	24.3333	14	10.9533	4.66667	1.13359	0.00215363	0.00325479	WP_005844952.1	MULTISPECIES: RNA polymerase sigma-70 factor [Bacteroidaceae]	2.66683	up
FHJOOPKJ_02945	12.3333	7	31.3967	13.1767	1.13106	0.019271	0.0263418	WP_008667329.1	DUF4492 domain-containing protein [Bacteroides sp. 4_3_47FAA]	1.7151	none
FHJOOPKJ_04228	2459	1414.67	464.41	206.517	1.12866	4.0227e-30	1.83745e-29	WP_214132966.1	mannose-1-phosphate guanylyltransferase [Phocaeicola vulgatus]	29.3955	up
FHJOOPKJ_03338	1955.33	1122	317.843	140.53	1.12702	4.40423e-44	2.90221e-43	WP_005851163.1	N-acetylglucosamine-6-phosphate deacetylase [Phocaeicola vulgatus]	43.3561	up
FHJOOPKJ_03557	284.333	162.333	91.3267	40.2333	1.12642	2.1269e-19	7.1356e-19	WP_005840961.1	MULTISPECIES: hypothetical protein [Bacteroidaceae]	18.6723	up
FHJOOPKJ_00990	2373.67	1358.67	323.227	143.24	1.12638	1.01118e-53	8.10045e-53	WP_005845878.1	MULTISPECIES: citrate/2-methylcitrate synthase [Bacteroidaceae]	52.9952	up
FHJOOPKJ_00027	383.667	220.333	60.7533	26.97	1.12484	1.74808e-27	7.57088e-27	WP_057280845.1	redoxin domain-containing protein [Phocaeicola vulgatus]	26.7574	up
FHJOOPKJ_03981	584.333	335.667	138.813	60.9733	1.12451	4.70915e-34	2.40828e-33	WP_005842974.1	MULTISPECIES: DUF1573 domain-containing protein [Phocaeicola]	33.3271	up
FHJOOPKJ_00988	3947.33	2259.67	300.017	133.647	1.12386	6.05327e-29	2.71107e-28	WP_008667761.1	MULTISPECIES: aconitate hydratase [Bacteroidaceae]	28.218	up
FHJOOPKJ_00136	1500.67	858.333	77.94	34.8333	1.12327	1.32775e-46	9.38869e-46	WP_117699953.1	efflux RND transporter permease subunit [Phocaeicola vulgatus]	45.8769	up
FHJOOPKJ_03066	1059.67	610.667	109.453	48.8233	1.11941	6.92452e-42	4.38235e-41	WP_085938703.1	MULTISPECIES: ATP-binding protein [Bacteroidaceae]	41.1596	up
FHJOOPKJ_03833	22	12.6667	5.3	2.32333	1.11727	0.00128349	0.00198293	WP_005843580.1	MULTISPECIES: AraC family transcriptional regulator [Bacteroidaceae]	2.89161	up
FHJOOPKJ_01468	2356	1361	1050.29	462.517	1.11411	1.459e-65	1.35132e-64	WP_005843153.1	MULTISPECIES: dTDP-4-dehydrorhamnose 3,5-epimerase [Bacteroidaceae]	64.8359	up
FHJOOPKJ_03982	112.667	65	231.583	98.0567	1.11347	3.61749e-10	8.38155e-10	WP_008670225.1	MULTISPECIES: NVEALA domain-containing protein [Bacteria]	9.44159	up
FHJOOPKJ_03457	154.667	89.6667	21.2767	9.39333	1.11318	7.70153e-09	1.65509e-08	WP_032944907.1	MULTISPECIES: oligosaccharide repeat unit polymerase [Phocaeicola]	8.11342	up
FHJOOPKJ_03704	44.6667	25.6667	11.19	5.00667	1.1099	0.00265854	0.00396892	WP_005841255.1	MULTISPECIES: proline/glycine betaine ABC transporter permease [Bacteroidaceae]	2.57536	up
FHJOOPKJ_01148	7259.67	4198	363.343	163.783	1.1084	3.13393e-39	1.82912e-38	WP_005848017.1	MULTISPECIES: carboxypeptidase regulatory-like domain-containing protein [Bacteroidaceae]	38.5039	up
FHJOOPKJ_03387	63	36.6667	150.413	63.0033	1.10835	5.54286e-06	1.01601e-05	EEX46963.1	hypothetical protein BACFIN_05316 [Bacteroides finegoldii DSM 17565]	5.25627	up
FHJOOPKJ_01537	26.6667	15.3333	3.41333	1.54	1.10761	0.00421329	0.00617468	WP_074783237.1	glutamate decarboxylase [Phocaeicola vulgatus]	2.37538	up
FHJOOPKJ_02694	1737.33	1011.67	265.593	118.677	1.10708	3.14407e-34	1.61463e-33	ALK86218.1	Sialic acid-induced transmembrane protein YjhT(NanM), possible mutarotase [Phocaeicola vulgatus]	33.5025	up
FHJOOPKJ_02179	655.667	380	26.6833	12.0667	1.1067	3.66091e-32	1.78767e-31	WP_117699909.1	ATP-binding protein [Phocaeicola vulgatus]	31.4364	up
FHJOOPKJ_01420	9.33333	5.33333	0.976667	0.446667	1.10296	0.0346336	0.045858	WP_008670056.1	MULTISPECIES: WG repeat-containing protein [Bacteroidaceae]	1.4605	none
FHJOOPKJ_02231	21.3333	12.3333	4.54333	2.12	1.09713	0.00336589	0.00498444	WP_005830364.1	MULTISPECIES: M20 family metallo-hydrolase [Bacteroides]	2.4729	up
FHJOOPKJ_02122	350	205	159.477	71.4	1.09378	1.84534e-21	6.62629e-21	WP_005853288.1	MULTISPECIES: flavin reductase family protein [Bacteroidaceae]	20.7339	up
FHJOOPKJ_00209	6350.33	3729	509.193	232.187	1.09142	5.20879e-58	4.45412e-57	WP_005845696.1	MULTISPECIES: methylmalonyl-CoA mutase [Bacteroidaceae]	57.2833	up
FHJOOPKJ_00782	100.667	59	47.8867	21.4433	1.08965	5.65174e-10	1.2956e-09	WP_008668754.1	MULTISPECIES: glutathione peroxidase [Bacteroidaceae]	9.24782	up
FHJOOPKJ_01028	21	12.3333	103.693	45.57	1.08571	0.00169203	0.00257837	EOR97370.1	hypothetical protein C800_04112 [Phocaeicola vulgatus dnLKV7]	2.77159	up
FHJOOPKJ_00318	480	284	862.98	372.207	1.08546	9.43856e-24	3.64938e-23	WP_005847085.1	MULTISPECIES: hypothetical protein [Bacteroidaceae]	23.0251	up
FHJOOPKJ_01342	177.333	104	34.8	15.9533	1.08432	8.28475e-13	2.17749e-12	WP_057099502.1	glycoside hydrolase family 43 protein [Phocaeicola vulgatus]	12.0817	up	PUL21	GH43_17
FHJOOPKJ_01784	215.667	127.333	42.81	19.6433	1.08241	7.74564e-15	2.21468e-14	EFG18680.1	transglycosylase SLT domain protein [Phocaeicola vulgatus PC510]	14.1109	up	PUL26	GH23
FHJOOPKJ_00293	508.333	301.667	69.0733	31.3133	1.08226	7.10213e-21	2.50619e-20	WP_032952357.1	gliding motility-associated protein GldE [Phocaeicola vulgatus]	20.1486	up
FHJOOPKJ_02952	27.6667	16.3333	17.1533	7.73667	1.08023	0.000561011	0.000899624	WP_074783074.1	tryptophan-rich sensory protein [Phocaeicola vulgatus]	3.25103	up
FHJOOPKJ_01972	1115	657.667	68.2667	31.35	1.07921	2.44107e-30	1.12338e-29	WP_117696267.1	substrate-binding domain-containing protein [Phocaeicola vulgatus]	29.6124	up
FHJOOPKJ_03686	25	14.6667	18.45	8.44333	1.0775	0.00118554	0.00184245	WP_117699785.1	MULTISPECIES: pyridoxamine 5'-phosphate oxidase family protein [Bacteroidaceae]	2.92608	up
FHJOOPKJ_01822	16064.7	9601	1493.48	692.4	1.07528	1.13747e-40	6.86775e-40	WP_005846698.1	MULTISPECIES: SusD/RagB family nutrient-binding outer membrane lipoprotein [Bacteroidaceae]	39.9441	up	PUL28	Unk
FHJOOPKJ_03328	844	503	30.9833	14.36	1.06818	2.736e-40	1.63582e-39	WP_117699573.1	response regulator [Phocaeicola vulgatus]	39.5629	up	PUL47	Unk
FHJOOPKJ_00999	136.333	80.6667	91.46	42.0767	1.06673	4.62665e-09	1.00963e-08	WP_005845887.1	MULTISPECIES: DoxX family protein [Bacteroidaceae]	8.33473	up
FHJOOPKJ_02968	24	14.3333	3.83	1.75333	1.06215	0.000839411	0.00131677	WP_005839115.1	MULTISPECIES: AhpC/TSA family protein [Bacteroidaceae]	3.07603	up
FHJOOPKJ_03559	227	136.333	98.1267	45.24	1.05815	1.10956e-18	3.65251e-18	WP_118170584.1	RNA polymerase sigma-70 factor [Phocaeicola vulgatus]	17.9548	up
FHJOOPKJ_01433	166.667	100.333	97.0033	44.4533	1.05776	2.63337e-14	7.39153e-14	WP_016270598.1	hypothetical protein [Phocaeicola vulgatus]	13.5795	up
FHJOOPKJ_00338	5083.67	3062.67	428.88	200.403	1.05433	1.89168e-65	1.74766e-64	WP_005851394.1	MULTISPECIES: family 10 glycosylhydrolase [Bacteroidaceae]	64.7232	up
FHJOOPKJ_00989	1890.67	1139.33	314.6	146.683	1.0542	1.96241e-29	8.87552e-29	WP_057279654.1	MULTISPECIES: NADP-dependent isocitrate dehydrogenase [Phocaeicola]	28.7072	up
FHJOOPKJ_00300	2315.33	1387	643.697	298.52	1.05312	4.39758e-18	1.42718e-17	WP_005851346.1	MULTISPECIES: indole-3-glycerol phosphate synthase TrpC [Phocaeicola]	17.3568	up
FHJOOPKJ_03673	1708.33	1034.67	254.857	118.83	1.05051	2.09796e-50	1.58403e-49	WP_117720393.1	N-glycanase [Phocaeicola vulgatus]	49.6782	up
FHJOOPKJ_00891	2439.67	1474	212.533	100.02	1.0487	1.14322e-55	9.4041e-55	WP_005844374.1	MULTISPECIES: carbohydrate binding domain-containing protein [Bacteroidaceae]	54.9419	up	PUL14	GH51
FHJOOPKJ_02123	153.333	92.6667	75.0967	34.8567	1.04528	4.2479e-10	9.79896e-10	ALK85362.1	Flavodoxin [Phocaeicola vulgatus]	9.37183	up
FHJOOPKJ_00256	41	24.6667	10.3967	4.92	1.04489	5.19496e-05	9.01883e-05	WP_229057119.1	substrate-binding domain-containing protein [Phocaeicola vulgatus]	4.28442	up
FHJOOPKJ_00605	395.333	242	117.753	54.6067	1.0423	3.08896e-16	9.2947e-16	WP_005849165.1	MULTISPECIES: outer membrane beta-barrel protein [Bacteroidaceae]	15.5102	up
FHJOOPKJ_01241	1107.67	672.667	155.603	73.2467	1.0419	5.82956e-42	3.70212e-41	WP_117699794.1	acetylxylan esterase [Phocaeicola vulgatus]	41.2344	up
FHJOOPKJ_02824	421.333	256.667	73.17	34.3	1.04184	3.65266e-21	1.30018e-20	WP_008765243.1	MULTISPECIES: fimbrillin family protein [Bacteroidales]	20.4374	up
FHJOOPKJ_02941	303.667	185	36.1067	17.0267	1.03701	1.09053e-17	3.48079e-17	WP_005843394.1	MULTISPECIES: glucose-6-phosphate dehydrogenase [Bacteroidaceae]	16.9624	up
FHJOOPKJ_00067	9.33333	5.66667	23.1767	10.2467	1.03548	0.0473121	0.0617341	WP_007831604.1	MULTISPECIES: hypothetical protein [Bacteroidaceae]	1.32503	none
FHJOOPKJ_01161	67.3333	41	28.2533	13.2033	1.03283	4.32842e-05	7.54294e-05	ABR40386.1	conserved hypothetical protein [Phocaeicola vulgatus ATCC 8482]	4.36367	up
FHJOOPKJ_03810	211	128.667	205.503	94.7433	1.03218	1.11454e-15	3.30231e-15	WP_117700291.1	hypothetical protein [Phocaeicola vulgatus]	14.9529	up
FHJOOPKJ_01853	184	112.667	16.1633	7.70333	1.02855	2.58941e-12	6.65823e-12	KAA5382652.1	hypothetical protein F2Y61_11900 [Phocaeicola dorei]	11.5868	up	PUL30	GH53
FHJOOPKJ_02079	158.333	97	65.4833	31.0533	1.02745	3.15936e-10	7.34787e-10	ABR38105.1	putative RNA polymerase ECF-type sigma factor [Phocaeicola vulgatus ATCC 8482]	9.5004	up
FHJOOPKJ_03703	105	64.3333	15.9433	7.59	1.02601	2.45326e-09	5.44396e-09	WP_005852472.1	MULTISPECIES: glycine betaine/L-proline ABC transporter ATP-binding protein [Phocaeicola]	8.61026	up
FHJOOPKJ_00150	9210.33	5677	1513.08	719.64	1.02132	4.93078e-58	4.22621e-57	WP_117699955.1	DUF4925 domain-containing protein [Phocaeicola vulgatus]	57.3071	up
FHJOOPKJ_01538	14.6667	9	2.31667	1.09333	1.01801	0.0117948	0.0164528	WP_117699938.1	MFS transporter [Phocaeicola vulgatus]	1.92831	none
FHJOOPKJ_01374	74.3333	46	30.8167	14.5967	1.01257	7.45564e-08	1.52387e-07	ABR38170.1	conserved hypothetical protein [Phocaeicola vulgatus ATCC 8482]	7.12752	up
FHJOOPKJ_00935	8091.33	5038.33	2673.2	1261.54	1.01083	5.44446e-53	4.30522e-52	WP_005845793.1	MULTISPECIES: hypothetical protein [Bacteroidaceae]	52.264	up
FHJOOPKJ_00581	6928.67	4331.67	417.013	202.947	1.00999	9.56865e-41	5.78683e-40	EET18378.1	TonB-linked outer membrane protein, SusC/RagA family [Bacteroides sp. 4_3_47FAA]	40.0191	up	PUL8	susC
FHJOOPKJ_04056	1111	696	175.393	84.4667	1.0037	5.17596e-36	2.78246e-35	WP_005841782.1	MULTISPECIES: L-serine ammonia-lyase [Bacteroidaceae]	35.286	up
FHJOOPKJ_03575	39.6667	24.6667	13.2633	6.39	1.00277	7.51669e-05	0.000129214	WP_005842266.1	MULTISPECIES: ABC transporter ATP-binding protein [Bacteroidaceae]	4.12397	up
FHJOOPKJ_04073	3819.33	2386	225.493	109.393	1.00106	9.95532e-58	8.47355e-57	WP_117834338.1	bifunctional fucokinase/L-fucose-1-P-guanylyltransferase [Phocaeicola vulgatus]	57.0019	up
FHJOOPKJ_02130	2907	1819	479.01	232.14	0.997866	2.14834e-55	1.76327e-54	WP_074784196.1	ABC transporter substrate-binding protein [Phocaeicola vulgatus]	54.6679	none
FHJOOPKJ_01105	8160.67	5110	1147.05	558.387	0.995426	1.32215e-50	1.00445e-49	KAB3629281.1	hypothetical protein GAT26_25280, partial [Phocaeicola vulgatus]	49.8787	none
FHJOOPKJ_03634	49.3333	31	15.8833	7.76	0.988857	9.6128e-06	1.72842e-05	WP_135951198.1	KilA-N domain-containing protein [Phocaeicola sartorii]	5.01715	none
FHJOOPKJ_01807	748.667	471.333	71.37	34.9133	0.986237	5.20394e-26	2.14999e-25	WP_117709759.1	Na+:solute symporter [Phocaeicola vulgatus]	25.2837	none
FHJOOPKJ_00181	197.667	125.333	30.8233	14.94	0.985153	1.43011e-13	3.87511e-13	WP_005845645.1	MULTISPECIES: radical SAM protein [Phocaeicola]	12.8446	none
FHJOOPKJ_00583	4067	2581.67	243.513	120.393	0.984764	5.55072e-31	2.62677e-30	WP_008669399.1	TonB-dependent receptor [Phocaeicola vulgatus]	30.2557	none	PUL8	susC
FHJOOPKJ_01918	33	20.6667	19.23	9.08667	0.982245	0.0368031	0.0486431	WP_057099137.1	N-acetylmuramoyl-L-alanine amidase [Phocaeicola vulgatus]	1.43412	none
FHJOOPKJ_02805	82	51.6667	163.817	77.3733	0.982038	2.44608e-06	4.57956e-06	EEU52188.1	hypothetical protein HMPREF0619_01747 [Parabacteroides sp. D13]	5.61153	none
FHJOOPKJ_01259	288.333	182.667	26.23	12.93	0.981154	1.08246e-13	2.95049e-13	WP_117699657.1	glycoside hydrolase [Phocaeicola vulgatus]	12.9656	none	PUL18	GH63
FHJOOPKJ_03505	8.66667	5.33333	8.62333	4.30333	0.980941	0.254238	0.295553	WP_005850573.1	MULTISPECIES: FtsX-like permease family protein [Bacteroidaceae]	0.594759	none
FHJOOPKJ_01837	34.3333	22	1.92333	0.933333	0.980876	0.00110731	0.00172378	WP_117696771.1	TonB-dependent receptor [Phocaeicola vulgatus]	2.95573	none	PUL29	susC
FHJOOPKJ_00841	301.333	191.667	77.1733	37.81	0.978668	7.58743e-17	2.34248e-16	EFG17201.1	conserved hypothetical protein [Phocaeicola vulgatus PC510]	16.1199	none
FHJOOPKJ_02038	202	127	142.943	71.4967	0.976573	1.40946e-09	3.16012e-09	WP_224205190.1	DUF6078 family protein [Phocaeicola vulgatus]	8.85095	none
FHJOOPKJ_00169	3290.33	2094.67	1242.41	604.507	0.976453	4.53075e-55	3.71037e-54	WP_016271316.1	DUF975 family protein [Phocaeicola vulgatus]	54.3438	none
FHJOOPKJ_02022	93	59	73.16	35.42	0.971041	3.23046e-07	6.36911e-07	WP_016271838.1	hypothetical protein [Phocaeicola vulgatus]	6.49074	none
FHJOOPKJ_01166	198.333	127	12.1933	6.06333	0.969432	5.44328e-12	1.37844e-11	WP_117700121.1	glycoside hydrolase family 78 protein [Phocaeicola vulgatus]	11.2641	none
FHJOOPKJ_03620	17.6667	11.3333	28.0767	12.6267	0.96893	0.00916214	0.0129474	OKZ35512.1	hypothetical protein BHV79_06495 [Bacteroides uniformis]	2.038	none
FHJOOPKJ_00080	21.3333	13.6667	9.74	4.71	0.967203	0.00517341	0.00749808	WP_057099408.1	MULTISPECIES: RNA polymerase sigma-70 factor [Bacteroidaceae]	2.28622	none
FHJOOPKJ_03645	134.333	86.6667	11.2533	5.55667	0.966825	1.07448e-08	2.29168e-08	OKZ13156.1	hypothetical protein BHV75_04080 [Bacteroides oleiciplenus]	7.9688	none
FHJOOPKJ_02680	762.333	487.667	384.92	190.007	0.965569	6.5597e-20	2.23333e-19	WP_172770056.1	hypothetical protein [Phocaeicola vulgatus]	19.1831	none
FHJOOPKJ_03809	289.667	184.333	48.3267	24.1767	0.958875	7.25848e-09	1.56444e-08	WP_005849916.1	MULTISPECIES: acyltransferase [Bacteroidaceae]	8.13915	none
FHJOOPKJ_00107	31.3333	20	5.29667	2.64333	0.958286	0.00697552	0.0100348	ALK86439.1	Rhamnogalacturonides degradation protein RhiN [Phocaeicola vulgatus]	2.15642	none	PUL4	GH105
FHJOOPKJ_01124	1690.33	1087.67	295.547	146.693	0.957506	1.04238e-35	5.59535e-35	WP_117699418.1	DUF4468 domain-containing protein [Phocaeicola vulgatus]	34.982	none
FHJOOPKJ_03419	668.333	430.667	353.887	173.687	0.956637	4.446e-22	1.63643e-21	WP_012055918.1	hypothetical protein [Phocaeicola vulgatus]	21.352	none
FHJOOPKJ_00170	5550.67	3596.67	1068	533.077	0.954767	2.65413e-50	1.99168e-49	WP_005845621.1	MULTISPECIES: branched-chain amino acid aminotransferase [Bacteroidaceae]	49.5761	none
FHJOOPKJ_02901	2543.33	1640.33	241.967	121.303	0.954082	2.29508e-41	1.42551e-40	WP_008668464.1	MULTISPECIES: 4-hydroxy-3-methylbut-2-en-1-yl diphosphate synthase [Bacteroidaceae]	40.6392	none
FHJOOPKJ_02148	216.333	140.333	492.247	230.257	0.953591	2.07121e-12	5.34444e-12	WP_005844025.1	MULTISPECIES: PspC domain-containing protein [Bacteroidaceae]	11.6838	none
FHJOOPKJ_03788	86.3333	55.6667	40.3033	20.09	0.949936	1.59727e-07	3.19194e-07	WP_005843001.1	MULTISPECIES: chromate transporter [Bacteroidaceae]	6.79662	none
FHJOOPKJ_00890	25	16.3333	2.98667	1.46	0.948652	0.00402211	0.00591098	WP_117700186.1	arabinan endo-1,5-alpha-L-arabinosidase [Phocaeicola vulgatus]	2.39555	none	PUL14	GH43_4
FHJOOPKJ_00301	3654.33	2358	734.787	366.993	0.948412	4.03675e-23	1.54134e-22	WP_032952361.1	MULTISPECIES: anthranilate phosphoribosyltransferase [Phocaeicola]	22.394	none
FHJOOPKJ_03933	25.6667	16.3333	5.67333	2.88333	0.947861	0.0104772	0.014704	ABR41754.1	conserved hypothetical protein [Phocaeicola vulgatus ATCC 8482]	1.97976	none
FHJOOPKJ_03097	1383.67	895.333	94.51	47.7267	0.947665	2.00995e-30	9.27302e-30	WP_117875922.1	TonB-dependent receptor family protein [Phocaeicola vulgatus]	29.6968	none
FHJOOPKJ_04254	50.6667	32.6667	54.18	25.8933	0.947215	0.00108466	0.00168924	ALK83533.1	Mobile element protein [Phocaeicola vulgatus]	2.96471	none
FHJOOPKJ_01713	410	263.667	79.18	39.39	0.946693	1.97389e-10	4.64065e-10	WP_117616317.1	MULTISPECIES: o-succinylbenzoate synthase [Bacteroidaceae]	9.70468	none
FHJOOPKJ_03872	371.333	241	15.3567	7.77	0.944278	1.10888e-19	3.75446e-19	WP_117700315.1	family 78 glycoside hydrolase catalytic domain [Phocaeicola vulgatus]	18.9551	none
FHJOOPKJ_03371	237.667	155	48.06	23.94	0.943554	2.64233e-15	7.66839e-15	KDS55520.1	acetyltransferase domain protein [Phocaeicola vulgatus str. 3975 RP4]	14.578	none
FHJOOPKJ_04234	8391.67	5438	951.017	480.497	0.943164	1.00444e-39	5.92827e-39	WP_057279979.1	MULTISPECIES: IS66-like element ISBvu4 family transposase [Bacteroidaceae]	38.9981	none
FHJOOPKJ_01030	21.6667	14	9.91	4.96	0.942686	0.00760379	0.0108706	WP_005845928.1	MULTISPECIES: RNA polymerase sigma-70 factor [Bacteroidaceae]	2.11897	none
FHJOOPKJ_01917	27	17.3333	15.5667	7.73333	0.942545	0.0624066	0.0800102	WP_005846750.1	MULTISPECIES: DNA-binding protein [Bacteroidaceae]	1.20477	none
FHJOOPKJ_03021	2165.33	1410.33	419.98	210.927	0.941451	3.10906e-44	2.05982e-43	WP_016270947.1	M20/M25/M40 family metallo-hydrolase [Phocaeicola vulgatus]	43.5074	none
FHJOOPKJ_02695	2958	1941	247.223	124.99	0.939067	4.69939e-36	2.52996e-35	WP_005840414.1	MULTISPECIES: family 20 glycosylhydrolase [Bacteroidaceae]	35.328	none
FHJOOPKJ_03736	7591.67	4976	1138.29	573.98	0.938719	1.66033e-33	8.38602e-33	WP_005843534.1	MULTISPECIES: DUF1015 domain-containing protein [Bacteroidaceae]	32.7798	none
FHJOOPKJ_02739	32.6667	21.3333	81.4867	38.8033	0.935413	0.000356411	0.000582455	KDS28891.1	hypothetical protein M098_1244 [Phocaeicola vulgatus str. 3775 SR(B) 19]	3.44805	none
FHJOOPKJ_03823	135	88.6667	19.0433	9.63333	0.93352	9.06027e-10	2.05139e-09	KDS27434.1	sodium/glutamate symporter family protein [Phocaeicola vulgatus str. 3775 SR(B) 19]	9.04286	none
FHJOOPKJ_00269	2162	1420	484.523	243.49	0.933185	6.19027e-32	3.00285e-31	WP_005842371.1	MULTISPECIES: nucleotidyltransferase [Bacteroidaceae]	31.2083	none
FHJOOPKJ_01027	398.667	258.667	83.96	42.74	0.932757	2.69094e-11	6.6052e-11	WP_005845921.1	MULTISPECIES: SPFH domain-containing protein [Bacteroidaceae]	10.5701	none
FHJOOPKJ_03849	312.667	205.333	46.5	23.5233	0.932352	5.79962e-15	1.66343e-14	WP_008781520.1	MULTISPECIES: hypothetical protein [Bacteroidaceae]	14.2366	none
FHJOOPKJ_03954	746.333	491	119.347	60.5633	0.930282	1.3762e-26	5.81641e-26	WP_005838767.1	MULTISPECIES: hypothetical protein [Phocaeicola]	25.8613	none
FHJOOPKJ_00584	1660.67	1091	209.373	107.827	0.930009	9.56264e-31	4.45087e-30	WP_005842656.1	MULTISPECIES: RagB/SusD family nutrient uptake outer membrane protein [Bacteroidaceae]	30.0194	none	PUL8	susD
FHJOOPKJ_01227	2653	1744	1678.42	835.1	0.927382	2.45818e-44	1.63745e-43	WP_005838800.1	MULTISPECIES: Lrp/AsnC ligand binding domain-containing protein [Bacteroidaceae]	43.6094	none
FHJOOPKJ_03923	2832	1869	1462.08	730.57	0.922629	2.47907e-49	1.83411e-48	WP_117699905.1	OmpH family outer membrane protein [Phocaeicola vulgatus]	48.6057	none
FHJOOPKJ_00045	755	497.333	44.6333	23.0133	0.921115	1.3357e-25	5.46925e-25	WP_016270836.1	helix-turn-helix domain-containing protein [Phocaeicola vulgatus]	24.8743	none	PUL2	Unk
FHJOOPKJ_04075	1899.33	1262.33	186.937	95.8867	0.918362	2.93995e-34	1.51191e-33	WP_117700276.1	signal peptide peptidase SppA [Phocaeicola vulgatus]	33.5317	none
FHJOOPKJ_02940	513.333	337.667	65.3533	33.7367	0.917652	9.57865e-17	2.95228e-16	WP_016270377.1	decarboxylating NADP(+)-dependent phosphogluconate dehydrogenase [Phocaeicola vulgatus]	16.0187	none
FHJOOPKJ_04194	826.667	547.667	190.9	97.0633	0.917542	5.86314e-27	2.50652e-26	ALK86339.1	Glyoxylate reductase / Glyoxylate reductase / Hydroxypyruvate reductase [Phocaeicola vulgatus]	26.2319	none
FHJOOPKJ_00204	195.333	129.667	38.9867	19.9	0.915068	7.87973e-11	1.88877e-10	WP_005845685.1	MULTISPECIES: FecR family protein [Bacteroidaceae]	10.1035	none
FHJOOPKJ_01536	13.6667	9	2.94	1.5	0.914132	0.0434274	0.0569685	WP_005841484.1	MULTISPECIES: glutaminase A [Bacteroidaceae]	1.36224	none
FHJOOPKJ_03789	61.6667	40.6667	26.92	13.72	0.912483	8.00774e-05	0.00013727	WP_005843003.1	MULTISPECIES: chromate transporter [Bacteroidaceae]	4.09649	none
FHJOOPKJ_00582	4496	3008	550.423	287.397	0.906261	3.1363e-47	2.24799e-46	WP_005839145.1	MULTISPECIES: RagB/SusD family nutrient uptake outer membrane protein [Bacteroidaceae]	46.5036	none	PUL8	susD
FHJOOPKJ_00792	30.3333	20.3333	6.06667	3.09667	0.901783	0.00128249	0.00198293	ABR41095.1	hypothetical protein BVU_3471 [Phocaeicola vulgatus ATCC 8482]	2.89195	none
FHJOOPKJ_01714	346.333	230.667	62.26	32.3033	0.901496	8.46864e-11	2.02597e-10	WP_005840495.1	MULTISPECIES: AMP-binding protein [Bacteroidaceae]	10.0722	none
FHJOOPKJ_01434	375.333	251.333	53.6367	27.84	0.898327	5.98784e-13	1.58398e-12	WP_022508100.1	MULTISPECIES: DUF4010 domain-containing protein [Phocaeicola]	12.2227	none
FHJOOPKJ_03560	414.333	280	82.8467	42.6	0.89732	2.10524e-16	6.40808e-16	WP_005850706.1	MULTISPECIES: FecR domain-containing protein [Bacteroidaceae]	15.6767	none
FHJOOPKJ_00442	6446	4332.67	503.957	262.567	0.896652	9.00341e-47	6.40339e-46	WP_005839267.1	MULTISPECIES: glutamine synthetase III [Bacteroidaceae]	46.0456	none
FHJOOPKJ_01106	10478.3	7067.67	1160.63	608.417	0.891716	1.01469e-47	7.35902e-47	WP_117699447.1	hypothetical protein [Phocaeicola vulgatus]	46.9937	none
FHJOOPKJ_01167	293	198.333	14.7667	7.71667	0.89122	1.01261e-13	2.76421e-13	WP_117720375.1	six-hairpin glycosidase [Phocaeicola vulgatus]	12.9946	none
FHJOOPKJ_00827	18941.7	12765.3	2785.66	1451.42	0.891156	1.08171e-47	7.82965e-47	WP_005850136.1	MULTISPECIES: beta-ketoacyl-ACP synthase II [Bacteroidaceae]	46.9659	none
FHJOOPKJ_04187	159.333	107.333	318.37	157.577	0.890804	9.3873e-09	2.01032e-08	WP_005846492.1	MULTISPECIES: cysteine-rich CWC family protein [Bacteroidaceae]	8.02746	none
FHJOOPKJ_03777	88.3333	60	11.39	5.96333	0.882256	5.32661e-07	1.03904e-06	MBS1390372.1	glycoside hydrolase family 28 protein [Bacteroides sp.]	6.27355	none	PUL51	GH28
FHJOOPKJ_01226	234	159.667	303.347	152.543	0.882164	5.91693e-09	1.28131e-08	WP_005838797.1	MULTISPECIES: DUF4491 family protein [Bacteroidaceae]	8.2279	none
FHJOOPKJ_01711	513.667	348.667	55.6667	29.3367	0.881823	9.80206e-18	3.1341e-17	WP_005840489.1	MULTISPECIES: 2-succinyl-5-enolpyruvyl-6-hydroxy-3-cyclohexene-1-carboxylic-acid synthase [Bacteroidaceae]	17.0087	none
FHJOOPKJ_00998	534.667	364.333	105.62	55.4033	0.88123	3.89021e-14	1.08202e-13	WP_005848961.1	MULTISPECIES: DUF4435 domain-containing protein [Bacteroidaceae]	13.41	none
FHJOOPKJ_00208	6049.67	4136.33	552.953	292.193	0.874274	9.05245e-41	5.49272e-40	WP_117696036.1	methylmalonyl-CoA mutase small subunit [Phocaeicola vulgatus]	40.0432	none
FHJOOPKJ_01162	423.333	289	105.693	55.4467	0.873463	3.14734e-14	8.79388e-14	WP_008667270.1	MULTISPECIES: helix-turn-helix domain-containing protein [Bacteroidaceae]	13.5021	none
FHJOOPKJ_03836	32.6667	22.3333	3.43	1.80667	0.871546	0.00125242	0.0019378	WP_118171440.1	RagB/SusD family nutrient uptake outer membrane protein [Phocaeicola vulgatus]	2.90225	none	PUL52	susD
FHJOOPKJ_00997	893.667	618.667	228.553	121.333	0.857388	9.22109e-25	3.66155e-24	WP_005845885.1	MULTISPECIES: ATP-binding protein [Bacteroidaceae]	24.0352	none
FHJOOPKJ_03323	33.6667	23.3333	3.42	1.80333	0.857365	0.00263846	0.00394055	WP_005847858.1	MULTISPECIES: hypothetical protein [Bacteroidaceae]	2.57865	none	PUL47	PL1_2
FHJOOPKJ_03455	90.3333	62.3333	50.44	26.7633	0.855826	2.07397e-06	3.89877e-06	ALK84953.1	Transcription antitermination protein UpdY [Phocaeicola vulgatus]	5.6832	none
FHJOOPKJ_03233	637	438.333	139.81	75.0867	0.854781	4.24613e-17	1.3209e-16	RIB32205.1	PD-(D/E)XK nuclease superfamily protein [Phocaeicola vulgatus]	16.372	none
FHJOOPKJ_03058	52.3333	36.3333	4.17333	2.22	0.85378	0.000329945	0.000540886	WP_117700040.1	MULTISPECIES: pectate lyase [Bacteroidaceae]	3.48156	none
FHJOOPKJ_01095	3215.67	2225	309.943	166.653	0.852591	9.54699e-41	5.78324e-40	WP_117695156.1	alpha-1,3-galactosidase [Phocaeicola vulgatus]	40.0201	none
FHJOOPKJ_02372	346.333	242.333	236.01	122.813	0.852566	1.06121e-09	2.39684e-09	WP_016270183.1	MULTISPECIES: hypothetical protein [Phocaeicola]	8.9742	none
FHJOOPKJ_00735	7471	5200.67	1086.35	582.597	0.851705	1.14822e-36	6.23635e-36	WP_005841993.1	MULTISPECIES: serine hydroxymethyltransferase [Bacteroidaceae]	35.94	none
FHJOOPKJ_03279	639	439.667	143.47	76.7	0.850247	6.15975e-10	1.40767e-09	WP_117699989.1	hypothetical protein [Phocaeicola vulgatus]	9.21044	none
FHJOOPKJ_00018	52.3333	36.3333	14.48	7.67333	0.849979	0.000198512	0.000331183	WP_115649104.1	hypothetical protein [Phocaeicola vulgatus]	3.70221	none	PUL1	Unk
FHJOOPKJ_01108	340	237	40.2167	21.4333	0.844322	5.15693e-14	1.42465e-13	WP_117699413.1	tetratricopeptide repeat protein [Phocaeicola vulgatus]	13.2876	none
FHJOOPKJ_02622	451.333	315	227.477	120.703	0.840731	5.58255e-18	1.80062e-17	WP_005844814.1	MULTISPECIES: gamma carbonic anhydrase family protein [Bacteroidaceae]	17.2532	none
FHJOOPKJ_01465	1517.67	1061.33	213.593	115.597	0.839468	7.14049e-34	3.63651e-33	WP_005851486.1	MULTISPECIES: xylose isomerase [Bacteroidaceae]	33.1463	none
FHJOOPKJ_02715	132.667	92.3333	49.54	26.94	0.838266	2.34427e-07	4.65939e-07	WP_005839721.1	MULTISPECIES: sigma-70 family RNA polymerase sigma factor [Bacteroidaceae]	6.62999	none
FHJOOPKJ_04157	133.333	94	20.1933	10.8767	0.835857	2.38463e-07	4.7345e-07	KAB3857256.1	site-specific integrase [Phocaeicola vulgatus]	6.62258	none
FHJOOPKJ_03291	7663.33	5420	1851.13	1001.83	0.833507	8.09785e-14	2.21381e-13	WP_057098714.1	DUF2807 domain-containing protein [Phocaeicola vulgatus]	13.0916	none
FHJOOPKJ_00778	66.6667	46.6667	50.6333	26.79	0.833067	0.000173544	0.000291113	WP_005839966.1	MULTISPECIES: DUF2442 domain-containing protein [Bacteroidaceae]	3.76059	none
FHJOOPKJ_00836	602.333	422	23.8633	13.0567	0.830618	2.59461e-15	7.53583e-15	WP_117699469.1	response regulator [Phocaeicola vulgatus]	14.5859	none
FHJOOPKJ_02094	26.3333	18.6667	6.60667	3.53333	0.82461	0.00832288	0.0118479	ABR40695.1	putative transcriptional regulatory protein [Phocaeicola vulgatus ATCC 8482]	2.07973	none
FHJOOPKJ_03125	1215	862	172.593	94.3867	0.821928	6.61528e-19	2.19139e-18	WP_005847325.1	MULTISPECIES: SpoIID/LytB domain-containing protein [Bacteroidaceae]	18.1795	none
FHJOOPKJ_02981	975.667	689	161.497	88.2433	0.821584	1.91375e-20	6.6574e-20	WP_005846032.1	MULTISPECIES: hypothetical protein [Bacteroidaceae]	19.7181	none
FHJOOPKJ_01542	2206	1556.33	469.743	256.637	0.820538	6.64296e-25	2.65791e-24	WP_005841495.1	MULTISPECIES: Fe-S cluster domain-containing protein [Bacteroidaceae]	24.1776	none
FHJOOPKJ_00970	56219.3	39922	15590.2	8455.42	0.819257	4.0145e-44	2.65015e-43	WP_005845856.1	MULTISPECIES: MotA/TolQ/ExbB proton channel family protein [Bacteroidaceae]	43.3964	none
FHJOOPKJ_00971	18254.3	12994	11408.5	6155.44	0.817019	2.4482e-41	1.51294e-40	WP_005849022.1	MULTISPECIES: hypothetical protein [Bacteria]	40.6112	none
FHJOOPKJ_04051	59.6667	42.6667	29.2167	15.77	0.816886	0.00067634	0.00107379	WP_005841792.1	MULTISPECIES: RNA polymerase sigma-70 factor [Bacteroidaceae]	3.16983	none
FHJOOPKJ_00731	1773.33	1257.33	377.32	207.393	0.814804	1.92371e-24	7.54102e-24	WP_005842002.1	MULTISPECIES: aspartate carbamoyltransferase [Bacteroidaceae]	23.7159	none
FHJOOPKJ_02382	12366.3	8832.33	1675.08	928.953	0.813158	1.38496e-25	5.65833e-25	WP_117699863.1	hypothetical protein [Phocaeicola vulgatus]	24.8586	none
FHJOOPKJ_03404	3256.33	2312.67	273.637	151.157	0.811645	1.72775e-33	8.71461e-33	WP_032952792.1	beta-galactosidase [Phocaeicola vulgatus]	32.7625	none
FHJOOPKJ_01977	952.667	676.667	380.397	207.587	0.811177	8.45904e-16	2.52262e-15	WP_005838679.1	DsbA family protein [Phocaeicola vulgatus]	15.0727	none
FHJOOPKJ_03934	71.6667	50.6667	7.70667	4.30667	0.81101	0.000532447	0.000855686	EET14567.1	ABC transporter, ATP-binding protein [Bacteroides sp. 4_3_47FAA]	3.27372	none
FHJOOPKJ_00126	1770.67	1266.33	248.043	136.637	0.809814	1.62136e-21	5.83913e-21	OKZ52895.1	transporter [Phocaeicola vulgatus]	20.7901	none
FHJOOPKJ_01202	11.3333	8	43.7767	23.61	0.809546	0.0643457	0.0823527	WP_196016037.1	linear amide C-N hydrolase, partial [Phocaeicola vulgatus]	1.19148	none
FHJOOPKJ_00123	920.333	657	136.407	75.1933	0.808875	4.69683e-22	1.7253e-21	WP_005853707.1	MULTISPECIES: ABC transporter permease [Bacteroidaceae]	21.3282	none
FHJOOPKJ_02789	9.66667	6.66667	1.39667	0.796667	0.808088	0.205544	0.244353	WP_057099050.1	MULTISPECIES: histidine-type phosphatase [Bacteroidaceae]	0.687095	none
FHJOOPKJ_00427	33.3333	23.3333	8.26333	4.62667	0.807866	0.0354212	0.0468671	WP_005843137.1	MULTISPECIES: DUF4422 domain-containing protein [Bacteroidaceae]	1.45074	none
FHJOOPKJ_00409	1437	1030.33	135.407	74.87	0.805945	3.60769e-25	1.46095e-24	WP_016270666.1	ATP-binding protein [Phocaeicola vulgatus]	24.4428	none
FHJOOPKJ_02192	10.3333	7.33333	2.89	1.60333	0.803211	0.080182	0.101351	WP_151881846.1	leucine-rich repeat domain-containing protein [Bacteroides uniformis]	1.09592	none
FHJOOPKJ_00228	5364	3855	559.53	311.91	0.803134	1.35125e-38	7.76333e-38	WP_005840641.1	MULTISPECIES: acyl-CoA dehydrogenase family protein [Bacteroidaceae]	37.8693	none
FHJOOPKJ_03683	5112	3671.33	2956.89	1630.19	0.798165	4.78596e-29	2.15134e-28	WP_005843294.1	MULTISPECIES: ferritin [Bacteroidaceae]	28.32	none
FHJOOPKJ_03010	900.667	649.333	308.973	171.553	0.796632	2.01598e-20	6.99315e-20	EET15949.1	peptidase, S41 family [Bacteroides sp. 4_3_47FAA]	19.6955	none
FHJOOPKJ_00450	444.333	320.333	302.083	165.447	0.796153	1.89553e-15	5.54485e-15	WP_005839284.1	MULTISPECIES: large-conductance mechanosensitive channel protein MscL [Bacteroidaceae]	14.7223	none
FHJOOPKJ_03674	5043.33	3645	598.197	334.067	0.793188	1.37367e-38	7.87987e-38	WP_032953588.1	DUF4301 family protein [Phocaeicola vulgatus]	37.8621	none
FHJOOPKJ_04136	21.6667	15.6667	97.0367	51.6	0.793063	0.0276087	0.0370835	EIY82196.1	hypothetical protein HMPREF1058_00977 [Phocaeicola vulgatus CL09T03C04]	1.55895	none
FHJOOPKJ_01806	324.667	235	75.3033	41.9567	0.789091	1.32303e-11	3.2937e-11	WP_117709760.1	alkaline phosphatase [Phocaeicola vulgatus]	10.8784	none
FHJOOPKJ_00113	57.3333	41.6667	18.59	10.2567	0.786388	0.00010678	0.000181521	WP_011964661.1	DUF4450 domain-containing protein [Phocaeicola vulgatus]	3.97151	none	PUL4	Unk
FHJOOPKJ_03032	61680.3	44936.3	3475.85	1966.29	0.786262	7.27697e-34	3.70089e-33	KAB6471852.1	TonB-dependent receptor [Phocaeicola vulgatus]	33.138	none	PUL41	susC
FHJOOPKJ_03798	2863.67	2081.33	146.613	82.6033	0.783787	1.37608e-34	7.16691e-34	WP_057279842.1	S41 family peptidase [Phocaeicola vulgatus]	33.8614	none
FHJOOPKJ_03023	446	323.333	24.3333	13.7933	0.782972	4.16587e-14	1.15782e-13	WP_011965367.1	MULTISPECIES: efflux RND transporter permease subunit [Bacteroidaceae]	13.3803	none
FHJOOPKJ_02623	2047.33	1502.33	202.51	114.34	0.779453	9.14167e-19	3.012e-18	MBT0707484.1	Creatinase/Prolidase N-terminal domain protein [Phocaeicola vulgatus]	18.039	none
FHJOOPKJ_03104	36	26.3333	69.94	36.8333	0.778864	0.00361445	0.0053332	TSE49217.1	hypothetical protein EH214_01515 [Phocaeicola vulgatus]	2.44196	none
FHJOOPKJ_00493	715.333	522.333	59.56	33.7933	0.778634	2.89818e-16	8.74869e-16	WP_117699637.1	HAD-IA family hydrolase [Phocaeicola vulgatus]	15.5379	none
FHJOOPKJ_03436	2531	1845.33	194.273	110.39	0.777986	6.98585e-31	3.2932e-30	WP_117700381.1	S9 family peptidase [Phocaeicola vulgatus]	30.1558	none
FHJOOPKJ_01617	172.333	126	34.2467	19.4333	0.77761	7.89023e-09	1.69366e-08	WP_005842620.1	MULTISPECIES: DUF4974 domain-containing protein [Bacteroidaceae]	8.10291	none	PUL22	Unk
FHJOOPKJ_02604	87	63.6667	17.5367	9.95333	0.775556	0.000276293	0.000455982	WP_008666412.1	MULTISPECIES: fimbrillin family protein [Bacteroidaceae]	3.55863	none
FHJOOPKJ_01488	90	66	226.137	121.687	0.773075	8.60546e-06	1.55261e-05	WP_016270646.1	MULTISPECIES: hypothetical protein [Bacteroidaceae]	5.06523	none
FHJOOPKJ_02696	2814	2069.67	212.25	120.32	0.772721	6.68831e-31	3.15698e-30	WP_005840412.1	MULTISPECIES: GH92 family glycosyl hydrolase [Bacteroidaceae]	30.1747	none
FHJOOPKJ_00578	6181.67	4543.67	359.67	205.213	0.771748	1.37708e-32	6.79667e-32	CUP90743.1	TonB-dependent receptor plug [Phocaeicola vulgatus]	31.861	none
FHJOOPKJ_02864	299.333	219.333	190.187	105.17	0.771302	2.57077e-11	6.31444e-11	WP_005848510.1	MULTISPECIES: thioredoxin [Bacteroidaceae]	10.5899	none
FHJOOPKJ_03103	172	126.333	92.77	51.6767	0.768425	2.54984e-06	4.76653e-06	WP_005845508.1	MULTISPECIES: hypothetical protein [Bacteroidaceae]	5.59349	none
FHJOOPKJ_03102	2328	1717.33	299.237	170.52	0.768009	4.11455e-25	1.66072e-24	WP_057279957.1	alkaline phosphatase [Phocaeicola vulgatus]	24.3857	none
FHJOOPKJ_01550	2234	1638.33	207.75	119.637	0.767872	4.67106e-31	2.22193e-30	KAB6447003.1	LruC domain-containing protein [Phocaeicola vulgatus]	30.3306	none
FHJOOPKJ_01463	347	254	104.473	59.16	0.766755	1.97371e-11	4.86415e-11	ALK86035.1	putative Nudix-like regulator [Phocaeicola vulgatus]	10.7047	none
FHJOOPKJ_02503	769.333	566.667	64.0633	36.5433	0.766039	1.16699e-15	3.45216e-15	WP_115648726.1	TonB-dependent receptor [Phocaeicola vulgatus]	14.9329	none
FHJOOPKJ_01522	948.333	694.667	215.113	118.737	0.764513	1.28309e-14	3.64601e-14	WP_008671263.1	MULTISPECIES: D-2-hydroxyacid dehydrogenase [Bacteroidaceae]	13.8917	none
FHJOOPKJ_02140	2096	1547.33	294.447	169.467	0.764125	2.0761e-22	7.74221e-22	CUP17661.1	carboxyl transferase [Phocaeicola vulgatus]	21.6828	none
FHJOOPKJ_00580	2076.33	1540	561.35	320.523	0.755605	8.34061e-31	3.89688e-30	WP_005839567.1	MULTISPECIES: hypothetical protein [Bacteroidaceae]	30.0788	none
FHJOOPKJ_03089	11.3333	8.33333	2.57333	1.49	0.752665	0.104	0.129586	WP_057279961.1	NUDIX domain-containing protein [Phocaeicola vulgatus]	0.982968	none
FHJOOPKJ_00973	25222.7	18863.3	15661.9	8907.18	0.750831	1.77304e-19	5.96476e-19	WP_005845862.1	MULTISPECIES: biopolymer transporter ExbD [Bacteroidaceae]	18.7513	none
FHJOOPKJ_03571	41	30.6667	2.91667	1.67	0.749337	0.00513112	0.00743972	WP_032952848.1	ABC transporter permease [Phocaeicola vulgatus]	2.28979	none
FHJOOPKJ_00758	153.667	114	103.023	58.7067	0.748465	0.00195435	0.00296581	WP_016271191.1	hypothetical protein [Phocaeicola vulgatus]	2.709	none
FHJOOPKJ_03076	817.333	609	132.47	76.3833	0.747766	1.42912e-18	4.67932e-18	ALK83438.1	hypothetical protein BvMPK_0820 [Phocaeicola vulgatus]	17.8449	none
FHJOOPKJ_03733	8380	6213.67	17232.9	9576	0.746126	2.08466e-22	7.76626e-22	WP_005843543.1	MULTISPECIES: RNA-binding protein [Bacteroidaceae]	21.681	none
FHJOOPKJ_02621	1011.33	756	576.117	329.76	0.745663	3.54503e-22	1.30874e-21	WP_005850625.1	MULTISPECIES: porin family protein [Bacteroidaceae]	21.4504	none
FHJOOPKJ_01419	6.33333	4.66667	3.39	1.95333	0.743058	0.215808	0.255482	WP_005852091.1	hypothetical protein [Phocaeicola vulgatus]	0.665933	none
FHJOOPKJ_01838	30.6667	23	3.25	1.86	0.742303	0.00716116	0.0102898	WP_117696775.1	RagB/SusD family nutrient uptake outer membrane protein [Phocaeicola vulgatus]	2.14502	none	PUL29	susD
FHJOOPKJ_03090	15.6667	11.6667	3.95667	2.3	0.742281	0.0643055	0.0823299	WP_117700386.1	polysaccharide biosynthesis protein [Phocaeicola vulgatus]	1.19175	none
FHJOOPKJ_00458	48.6667	36	93.47	52.98	0.739656	0.00863376	0.0122715	ABR41207.1	hypothetical protein BVU_3594 [Phocaeicola vulgatus ATCC 8482]	2.0638	none
FHJOOPKJ_00408	337.667	254.333	62.1867	35.86	0.739289	4.76862e-10	1.09726e-09	WP_005843117.1	MULTISPECIES: endonuclease/exonuclease/phosphatase family protein [Bacteroidaceae]	9.32161	none
FHJOOPKJ_04048	29268	21957.3	1911.44	1111.59	0.738905	3.15935e-39	1.84103e-38	ALK85686.1	Glycogen phosphorylase [Phocaeicola vulgatus]	38.5004	none
FHJOOPKJ_01314	365.667	274.333	25.8133	15.1	0.737994	4.42044e-13	1.17357e-12	WP_057249928.1	hypothetical protein [Phocaeicola vulgatus]	12.3545	none
FHJOOPKJ_03664	457.333	345.333	73.2267	42.3967	0.737854	1.83357e-11	4.53399e-11	WP_005843341.1	MULTISPECIES: peptidase M75 [Bacteroidaceae]	10.7367	none
FHJOOPKJ_00914	176	132.667	32.4533	18.67	0.736722	8.41919e-07	1.62421e-06	WP_011965373.1	MULTISPECIES: class I fructose-bisphosphate aldolase [Phocaeicola]	6.07473	none
FHJOOPKJ_00846	405.667	303	44.97	26.5567	0.734212	5.08456e-10	1.16849e-09	WP_117699472.1	C45 family autoproteolytic acyltransferase/hydolase [Phocaeicola vulgatus]	9.29375	none
FHJOOPKJ_01544	1295	974	259.807	150.503	0.732544	4.30441e-23	1.64184e-22	WP_005841499.1	MULTISPECIES: RnfABCDGE type electron transport complex subunit D [Bacteroidaceae]	22.3661	none
FHJOOPKJ_01272	506	380.667	80.1333	46.7533	0.732143	1.24623e-12	3.24992e-12	WP_057279818.1	OprO/OprP family phosphate-selective porin [Phocaeicola vulgatus]	11.9044	none
FHJOOPKJ_03969	12	9	3.50333	1.99333	0.730575	0.105129	0.130815	WP_005841675.1	MULTISPECIES: NigD-like protein [Bacteroidaceae]	0.978279	none
FHJOOPKJ_00579	3608.67	2729.67	420.783	245.7	0.728772	3.28602e-26	1.36837e-25	WP_016271948.1	RagB/SusD family nutrient uptake outer membrane protein [Phocaeicola vulgatus]	25.4833	none	PUL7	susD
FHJOOPKJ_00871	626.333	470.333	131.32	76.8967	0.728657	1.55434e-12	4.03623e-12	WP_057279260.1	beta-ketoacyl synthase chain length factor [Phocaeicola vulgatus]	11.8085	none
FHJOOPKJ_03018	1929.33	1460.67	888.403	507.343	0.727417	1.56906e-21	5.66741e-21	WP_005839846.1	MULTISPECIES: ribosome recycling factor [Bacteroidaceae]	20.8044	none
FHJOOPKJ_04065	8	6	2.72333	1.58667	0.726487	0.203991	0.242665	WP_229112411.1	toprim domain-containing protein [Bacteroides xylanisolvens]	0.690388	none
FHJOOPKJ_02790	615.667	468.333	27.73	16.4967	0.723226	8.53143e-11	2.03967e-10	WP_195399446.1	MULTISPECIES: hypothetical protein [Bacteroides]	10.069	none
FHJOOPKJ_00976	609.667	462.333	80.4133	47.1667	0.722955	1.10735e-15	3.28364e-15	ALK83788.1	IgA Peptidase [Phocaeicola vulgatus]	14.9557	none
FHJOOPKJ_00872	1852.33	1398	303.123	178.787	0.721828	2.32326e-19	7.78725e-19	WP_117699483.1	beta-ketoacyl-[acyl-carrier-protein] synthase family protein [Phocaeicola vulgatus]	18.6339	none
FHJOOPKJ_02590	22950.3	17471.7	1299.4	771.027	0.721106	1.00598e-26	4.26643e-26	WP_172770031.1	hypothetical protein [Phocaeicola vulgatus]	25.9974	none
FHJOOPKJ_00124	1639.67	1240.67	245.933	144.543	0.720076	4.85029e-22	1.77989e-21	WP_005853705.1	MULTISPECIES: ABC transporter permease [Bacteroidaceae]	21.3142	none
FHJOOPKJ_03615	54.6667	41.3333	35.11	20.63	0.71961	0.00138202	0.00212979	WP_117889432.1	DUF4494 family protein [Phocaeicola vulgatus]	2.85949	none
FHJOOPKJ_00320	996	754.333	3078.65	1732.44	0.719393	7.095e-12	1.78443e-11	WP_005847090.1	MULTISPECIES: YtxH domain-containing protein [Bacteroidaceae]	11.149	none
FHJOOPKJ_03663	803.667	615.333	110.94	65.26	0.717698	5.75224e-14	1.58316e-13	WP_005843343.1	MULTISPECIES: hypothetical protein [Bacteroidaceae]	13.2402	none
FHJOOPKJ_01101	1047.33	794.333	257.14	150.82	0.717252	9.13089e-19	3.01114e-18	WP_016270079.1	50S ribosomal protein L11 methyltransferase [Phocaeicola vulgatus]	18.0395	none
FHJOOPKJ_03031	29906	22844.3	3359.07	1988.18	0.71624	1.66973e-31	8.00469e-31	WP_008669390.1	MULTISPECIES: RagB/SusD family nutrient uptake outer membrane protein [Bacteroidaceae]	30.7774	none	PUL41	susD
FHJOOPKJ_00830	147	112.667	12.2633	7.21	0.715623	1.27021e-05	2.26726e-05	WP_117699464.1	alpha-galactosidase [Phocaeicola vulgatus]	4.89613	none
FHJOOPKJ_03767	949	722.667	79.4767	46.9767	0.715491	3.20368e-21	1.14257e-20	WP_005845464.1	MULTISPECIES: HDIG domain-containing protein [Bacteroidaceae]	20.4944	none
FHJOOPKJ_01611	205.667	156.667	110.353	63.7533	0.712812	7.81853e-09	1.67925e-08	WP_005848874.1	MULTISPECIES: hypothetical protein [Bacteroidaceae]	8.10687	none
FHJOOPKJ_01712	602.333	457.333	158.12	94.77	0.712621	2.2451e-10	5.26817e-10	WP_005840491.1	MULTISPECIES: 1,4-dihydroxy-2-naphthoyl-CoA synthase [Bacteroidaceae]	9.64876	none
FHJOOPKJ_04233	17.3333	13.3333	2.71333	1.53667	0.712127	0.0602738	0.0774647	WP_057250619.1	MULTISPECIES: DUF3874 domain-containing protein [Phocaeicola]	1.21987	none
FHJOOPKJ_00972	32659	25168	13816.8	8077	0.710335	6.70352e-14	1.84084e-13	WP_005845860.1	MULTISPECIES: biopolymer transporter ExbD [Bacteroidaceae]	13.1737	none
FHJOOPKJ_03695	230	176	75.7367	44.7533	0.709407	1.73598e-08	3.67085e-08	WP_005841236.1	MULTISPECIES: HAD family hydrolase [Bacteroidaceae]	7.76045	none
FHJOOPKJ_01246	14	10.6667	0.54	0.326667	0.706771	0.0669342	0.0853684	WP_117699797.1	response regulator [Phocaeicola vulgatus]	1.17435	none
FHJOOPKJ_03898	60	46.3333	131.277	73.1967	0.704175	0.00172308	0.00262351	KAB3548486.1	hypothetical protein GAX95_22395 [Phocaeicola vulgatus]	2.76369	none
FHJOOPKJ_01055	4324.67	3334.33	1417.15	841.383	0.698862	3.26061e-08	6.78126e-08	WP_117678090.1	TonB family protein [Phocaeicola vulgatus]	7.4867	none
FHJOOPKJ_01464	952.667	733	117.103	69.92	0.697105	9.71844e-17	2.99286e-16	WP_005843149.1	MULTISPECIES: carbohydrate kinase [Bacteroidaceae]	16.0124	none
FHJOOPKJ_01997	2038	1579.67	1226.25	725.143	0.696946	2.73578e-11	6.7063e-11	WP_005839215.1	MULTISPECIES: DUF3836 domain-containing protein [Bacteroidaceae]	10.5629	none
FHJOOPKJ_00492	270.333	208.333	142.017	83.3667	0.696518	1.28299e-08	2.72533e-08	WP_117699636.1	NlpC/P60 family protein [Phocaeicola vulgatus]	7.89178	none
FHJOOPKJ_04076	530.667	411.333	92.8033	55.2367	0.695662	1.73791e-11	4.30032e-11	WP_057280071.1	tetraacyldisaccharide 4'-kinase [Phocaeicola vulgatus]	10.76	none
FHJOOPKJ_01568	191	148	284.03	161.75	0.694843	6.33271e-08	1.30013e-07	WP_005839009.1	MULTISPECIES: cell division protein ZapA [Bacteria]	7.19841	none
FHJOOPKJ_02679	2061.33	1593.33	1291.14	761.743	0.69353	2.54305e-16	7.70246e-16	WP_172770057.1	DUF4252 domain-containing protein [Phocaeicola vulgatus]	15.5946	none
FHJOOPKJ_00025	61	46.6667	25.24	15.2667	0.69255	0.00464619	0.00676863	QUT56903.1	ECF RNA polymerase sigma factor SigW [Phocaeicola vulgatus]	2.3329	none
FHJOOPKJ_03376	3454	2678.67	566.583	339.513	0.690225	3.657e-25	1.47929e-24	EFG15723.1	sodium ion-translocating decarboxylase, beta subunit [Phocaeicola vulgatus PC510]	24.4369	none
FHJOOPKJ_03871	88	69	10.8833	6.46	0.690184	0.00146614	0.00225282	WP_016270207.1	MULTISPECIES: glycoside hydrolase family 140 protein [Phocaeicola]	2.83382	none
FHJOOPKJ_04219	49.6667	38.6667	8.66333	5.23667	0.688324	0.00215475	0.00325514	WP_195641821.1	site-specific integrase [Phocaeicola vulgatus]	2.6666	none
FHJOOPKJ_01229	524.333	406.333	76.5333	46.0667	0.685889	7.67656e-09	1.65068e-08	WP_005838803.1	MULTISPECIES: hemolysin family protein [Bacteroidaceae]	8.11483	none
FHJOOPKJ_00438	22.3333	17.3333	3.53333	2.12667	0.682436	0.0560168	0.0723223	WP_008669564.1	MULTISPECIES: ABC transporter permease [Bacteroidaceae]	1.25168	none
FHJOOPKJ_02424	52.3333	41	119.98	67.8633	0.678473	0.0060893	0.00879432	EXY10293.1	hypothetical protein M101_5086 [Bacteroides fragilis str. 1007-1-F #8]	2.21543	none
FHJOOPKJ_02502	698.667	546.333	54.9333	33.4667	0.6779	4.20311e-12	1.0688e-11	WP_057280798.1	MULTISPECIES: TonB-dependent receptor [Bacteroidaceae]	11.3764	none
FHJOOPKJ_03499	26851	21105.3	2826.24	1711.71	0.676515	1.69976e-29	7.70654e-29	WP_005844474.1	MULTISPECIES: tetratricopeptide repeat protein [Bacteroidaceae]	28.7696	none
FHJOOPKJ_02682	1648	1300.67	944.653	558.767	0.675299	5.56465e-14	1.53267e-13	WP_022508197.1	DUF4252 domain-containing protein [Phocaeicola vulgatus]	13.2546	none
FHJOOPKJ_02769	54	42.6667	85.2167	48.44	0.674794	0.00329518	0.00488171	WP_117696092.1	hypothetical protein [Phocaeicola vulgatus]	2.48212	none
FHJOOPKJ_01546	553.667	433.667	234.223	139.86	0.674639	5.61135e-12	1.4171e-11	WP_005841504.1	MULTISPECIES: electron transport complex subunit E [Bacteroidaceae]	11.2509	none
FHJOOPKJ_02131	4750	3734	372.533	227.503	0.669703	1.32013e-20	4.62298e-20	WP_115648730.1	TonB-dependent receptor [Phocaeicola vulgatus]	19.8794	none
FHJOOPKJ_01425	13458.3	10658	1352.79	823.967	0.667305	2.09545e-25	8.5232e-25	WP_005841583.1	MULTISPECIES: phospho-sugar mutase [Bacteroidaceae]	24.6787	none
FHJOOPKJ_03073	500.333	395	65.6567	40.19	0.66722	4.28426e-12	1.08718e-11	WP_117700038.1	MULTISPECIES: D-alanyl-D-alanine carboxypeptidase/D-alanyl-D-alanine-endopeptidase [Bacteroidaceae]	11.3681	none
FHJOOPKJ_04198	12	9.33333	1.74	1.08333	0.666585	0.146692	0.178604	KAA3974226.1	tyrosine-type recombinase/integrase [Bacteroides ovatus]	0.833595	none
FHJOOPKJ_02159	93	73	18.37	11.34	0.664192	0.00134682	0.00207641	WP_117699921.1	FecR family protein [Phocaeicola vulgatus]	2.87069	none	PUL32	Unk
FHJOOPKJ_00437	10.6667	8.33333	1.69333	1.05667	0.662982	0.206009	0.244827	WP_005839257.1	MULTISPECIES: ABC transporter permease [Bacteroidaceae]	0.686114	none
FHJOOPKJ_00942	314.667	248.333	99.0567	60.1767	0.662414	8.8571e-09	1.90009e-08	WP_224205276.1	DUF5683 domain-containing protein [Phocaeicola vulgatus]	8.05271	none
FHJOOPKJ_01217	75.6667	59.6667	4.77667	2.94333	0.662397	0.000453613	0.000734127	EET18130.1	hypothetical protein BSFG_04279 [Bacteroides sp. 4_3_47FAA]	3.34331	none	PUL16	GH138
FHJOOPKJ_01547	670.333	530.333	267.18	161.307	0.660759	4.15936e-10	9.60677e-10	WP_005841506.1	MULTISPECIES: electron transport complex subunit RsxA [Bacteroidaceae]	9.38097	none
FHJOOPKJ_02681	1434	1143	828.67	495.48	0.656095	1.64029e-08	3.47227e-08	WP_005844918.1	MULTISPECIES: RNA polymerase sigma factor [Bacteroidaceae]	7.78508	none
FHJOOPKJ_00845	325	258.333	47.18	28.9867	0.655283	2.52053e-09	5.58649e-09	WP_008666626.1	MULTISPECIES: AMP-binding protein [Bacteroidaceae]	8.59851	none
FHJOOPKJ_02965	39	31	1.86	1.16	0.653025	0.00412283	0.00605175	WP_100263181.1	SusC/RagA family TonB-linked outer membrane protein [Phocaeicola vulgatus]	2.38481	none	PUL39	susC
FHJOOPKJ_02492	72.3333	57.6667	46.6433	28.56	0.652917	0.0014937	0.00229134	WP_147542324.1	MULTISPECIES: DUF3761 domain-containing protein [Phocaeicola]	2.82574	none
FHJOOPKJ_00803	225.667	179.667	64.0633	39.8133	0.65093	6.92086e-07	1.34149e-06	WP_005841745.1	MULTISPECIES: ParA family protein [Bacteroidaceae]	6.15984	none
FHJOOPKJ_02697	4527	3614.67	304.453	188.593	0.650453	2.86263e-27	1.23398e-26	WP_032952341.1	DUF4982 domain-containing protein [Phocaeicola vulgatus]	26.5432	none
FHJOOPKJ_01312	1462	1170	78.7433	48.7567	0.648111	2.30002e-15	6.7014e-15	WP_117694349.1	DUF4981 domain-containing protein [Phocaeicola vulgatus]	14.6383	none	PUL20	GH2
FHJOOPKJ_00825	171.667	137.333	73.5333	44.75	0.648039	1.24448e-06	2.36974e-06	WP_117699492.1	phosphoribosylglycinamide formyltransferase [Phocaeicola vulgatus]	5.90501	none
FHJOOPKJ_02718	27.3333	21.6667	3.05	1.91	0.647567	0.0298733	0.0399287	WP_118327679.1	RagB/SusD family nutrient uptake outer membrane protein [Phocaeicola vulgatus]	1.52472	none	PUL37	susD
FHJOOPKJ_02714	5639.33	4511.33	883.533	549.983	0.647448	8.69168e-25	3.45506e-24	ALK86195.1	N-acetylglucosamine repressor [Phocaeicola vulgatus]	24.0609	none
FHJOOPKJ_00307	1134.33	907.333	511.79	313.57	0.646768	8.34683e-12	2.08926e-11	ALK86162.1	hypothetical protein BvMPK_3601 [Phocaeicola vulgatus]	11.0785	none
FHJOOPKJ_00423	1010.33	803.333	148.457	91.8333	0.645854	8.34925e-13	2.19287e-12	WP_202769614.1	ABC transporter ATP-binding protein [Phocaeicola vulgatus]	12.0784	none
FHJOOPKJ_01010	81.3333	64.6667	13.35	8.29333	0.645049	0.00218598	0.0032996	ALK83826.1	putative anti-sigma factor [Phocaeicola vulgatus]	2.66035	none	PUL15	Unk
FHJOOPKJ_02427	16.3333	13	11.4833	7.15667	0.641486	0.115307	0.142708	KAB3845842.1	hypothetical protein GAS47_06490 [Phocaeicola vulgatus]	0.938143	none
FHJOOPKJ_01462	556	447.333	535.45	321.277	0.640605	4.41102e-13	1.17192e-12	ALK86036.1	putative two-component system response regulator [Phocaeicola vulgatus]	12.3555	none
FHJOOPKJ_01592	930.333	745	182.047	112.52	0.638786	1.95328e-08	4.10881e-08	BDC14189.1	iron ABC transporter [Phocaeicola vulgatus]	7.70924	none
FHJOOPKJ_03434	2282.67	1832.67	255.603	159.357	0.637216	2.37095e-21	8.50537e-21	WP_117700382.1	C69 family dipeptidase [Phocaeicola vulgatus]	20.6251	none
FHJOOPKJ_00302	2043	1639	849.823	524.02	0.635098	3.30531e-12	8.43417e-12	WP_005839785.1	MULTISPECIES: aminodeoxychorismate/anthranilate synthase component II [Bacteroidaceae]	11.4808	none
FHJOOPKJ_02865	296.333	238	426.503	255.747	0.634112	1.28334e-07	2.58284e-07	WP_011965573.1	MULTISPECIES: thioredoxin [Phocaeicola]	6.89166	none
FHJOOPKJ_00412	252	203.333	43.3567	26.9533	0.633383	2.90804e-07	5.75195e-07	WP_117694595.1	glycosyltransferase family 4 protein [Phocaeicola vulgatus]	6.5364	none
FHJOOPKJ_03020	1948.33	1576	421.363	260.603	0.632948	9.36462e-16	2.78815e-15	WP_005839841.1	MULTISPECIES: ribosome small subunit-dependent GTPase A [Bacteroidaceae]	15.0285	none
FHJOOPKJ_02804	23.6667	19	3.43667	2.16333	0.632342	0.054577	0.0705624	WP_195399444.1	MULTISPECIES: DUF3945 domain-containing protein [Bacteroides]	1.26299	none
FHJOOPKJ_00934	484	391.667	123.717	76.6967	0.632061	5.55299e-10	1.27376e-09	WP_117696539.1	DUF3822 family protein [Phocaeicola vulgatus]	9.25547	none
FHJOOPKJ_03811	42.3333	34.3333	66.0667	38.8267	0.629339	0.0093276	0.0131661	WP_008670518.1	MULTISPECIES: hypothetical protein [Bacteroidaceae]	2.03023	none
FHJOOPKJ_00122	756.667	614	232.793	144.513	0.628114	1.83219e-13	4.93912e-13	WP_005843634.1	MULTISPECIES: ABC transporter ATP-binding protein [Bacteroidaceae]	12.737	none
FHJOOPKJ_01777	2009.67	1626.67	404.127	255.143	0.626889	7.30924e-17	2.25849e-16	WP_057280266.1	glycoside hydrolase family 130 protein [Phocaeicola vulgatus]	16.1361	none	PUL26	GH130
FHJOOPKJ_02511	586	476	231.33	143.55	0.626802	5.50013e-12	1.39092e-11	WP_005845944.1	MULTISPECIES: thiamine phosphate synthase [Bacteroidaceae]	11.2596	none
FHJOOPKJ_04070	17.3333	14	3.23333	1.96667	0.626637	0.0800227	0.101219	WP_075964301.1	relaxase/mobilization nuclease domain-containing protein [Parabacteroides massiliensis]	1.09679	none
FHJOOPKJ_03444	60.6667	49.3333	13.1333	8.13667	0.62537	0.00324867	0.00482057	WP_032938267.1	MULTISPECIES: FimB/Mfa2 family fimbrial subunit [Bacteroidaceae]	2.48829	none
FHJOOPKJ_01664	366660	299179	20790.5	13263.2	0.623277	3.77413e-15	1.08973e-14	WP_130054654.1	hypothetical protein [Phocaeicola dorei]	14.4232	none
FHJOOPKJ_02111	794	647.667	102.627	64.7033	0.620402	4.65179e-14	1.28994e-13	WP_005846562.1	MULTISPECIES: glucuronate isomerase [Bacteroidaceae]	13.3324	none
FHJOOPKJ_03087	1577.33	1286.33	91.9033	58.5067	0.619446	1.00014e-17	3.19504e-17	WP_117875983.1	PL29 family lyase N-terminal domain-containing protein [Phocaeicola vulgatus]	16.9999	none
FHJOOPKJ_01543	2974.33	2421	413.81	260.32	0.618838	2.86747e-21	1.02565e-20	WP_005841497.1	MULTISPECIES: electron transport complex subunit RsxC [Bacteroidaceae]	20.5425	none
FHJOOPKJ_01103	1697.33	1379.33	143.117	90.9833	0.618133	2.36493e-14	6.64313e-14	WP_057099021.1	MULTISPECIES: DUF3874 domain-containing protein [Phocaeicola]	13.6262	none
FHJOOPKJ_03681	2269	1845.33	202.96	127.573	0.616579	5.80149e-14	1.59552e-13	WP_117720397.1	oligopeptide transporter, OPT family [Phocaeicola vulgatus]	13.2365	none
FHJOOPKJ_00226	3584	2930.33	700.39	441.733	0.61521	9.61227e-24	3.71264e-23	WP_005840637.1	MULTISPECIES: electron transfer flavoprotein subunit alpha/FixB family protein [Bacteroidaceae]	23.0172	none
FHJOOPKJ_01285	21	17.3333	8.74	5.27333	0.615028	0.0822414	0.103811	WP_117678028.1	hypothetical protein [Phocaeicola vulgatus]	1.08491	none
FHJOOPKJ_02717	56	45.3333	2.45667	1.57333	0.614534	0.0285889	0.0383236	WP_057099350.1	TonB-dependent receptor [Phocaeicola vulgatus]	1.5438	none	PUL37	susC
FHJOOPKJ_03610	45.3333	37	41.77	25.2667	0.614305	0.0182917	0.0250965	OKZ35505.1	hypothetical protein BHV79_06455 [Bacteroides uniformis]	1.73775	none
FHJOOPKJ_02797	15	12.3333	2.76	1.75	0.611538	0.199666	0.237827	WP_074704930.1	tyrosine-type recombinase/integrase [Bacteroides xylanisolvens]	0.699696	none
FHJOOPKJ_02155	2058	1687.33	241.42	152.83	0.61117	1.89782e-15	5.54713e-15	WP_016271786.1	arylsulfatase [Phocaeicola vulgatus]	14.7217	none	PUL32	Unk
FHJOOPKJ_01948	10685.7	8768	4217.32	2639.87	0.611053	2.51353e-10	5.87181e-10	WP_005840300.1	MULTISPECIES: PorT family protein [Bacteroidaceae]	9.59972	none
FHJOOPKJ_03611	16.6667	13.6667	23.9433	14.4467	0.609499	0.103683	0.129279	WP_181987480.1	DUF3853 family protein [Phocaeicola vulgatus]	0.984291	none
FHJOOPKJ_01469	2616.67	2145.67	614.457	387.367	0.608927	2.2476e-20	7.78927e-20	WP_008671327.1	MULTISPECIES: glucose-1-phosphate thymidylyltransferase RfbA [Bacteroidaceae]	19.6483	none
FHJOOPKJ_01375	9	7.33333	18.26	11.16	0.606292	0.247857	0.288957	WP_005840821.1	MULTISPECIES: 2TM domain-containing protein [Bacteroidaceae]	0.605799	none
FHJOOPKJ_00649	224	185	44.0833	27.76	0.606065	6.87481e-07	1.33326e-06	WP_117694042.1	Fic family protein [Phocaeicola vulgatus]	6.16274	none	PUL11	Unk
FHJOOPKJ_00966	25366	20894.3	8379.56	5262.27	0.604283	1.06408e-22	3.99247e-22	KAB3840139.1	TonB family protein [Phocaeicola vulgatus]	21.973	none
FHJOOPKJ_00874	1246.67	1023.67	130.09	83.4633	0.598826	4.73049e-10	1.08917e-09	WP_117699485.1	beta-ACP synthase [Phocaeicola vulgatus]	9.32509	none
FHJOOPKJ_00212	176.333	146.667	172.957	105.877	0.598782	3.86221e-05	6.74969e-05	WP_005845180.1	MULTISPECIES: DUF1232 domain-containing protein [Bacteroidaceae]	4.41316	none	PUL6	Unk
FHJOOPKJ_02872	409.333	339.333	24.3033	15.72	0.598742	6.57872e-10	1.50155e-09	WP_115648858.1	helix-turn-helix domain-containing protein [Phocaeicola vulgatus]	9.18186	none
FHJOOPKJ_04197	186	154	67.0633	42.4133	0.596396	3.0545e-06	5.69544e-06	ALK86337.1	putative lipoprotein [Phocaeicola vulgatus]	5.51506	none
FHJOOPKJ_00900	4455	3676.33	364.873	234.08	0.595697	5.2432e-19	1.74473e-18	WP_008666673.1	MULTISPECIES: M3 family metallopeptidase [Bacteroidaceae]	18.2804	none
FHJOOPKJ_00732	915.667	759	562.017	350.65	0.59493	2.85077e-13	7.61241e-13	WP_005841999.1	MULTISPECIES: aspartate carbamoyltransferase regulatory subunit [Bacteroidaceae]	12.545	none
FHJOOPKJ_00915	211	175.333	53.5	34.1567	0.593486	2.46615e-05	4.34501e-05	EFG19155.1	phosphoglycerate mutase 1 family protein [Phocaeicola vulgatus PC510]	4.60798	none
FHJOOPKJ_02152	3598	2989.33	437.623	279.97	0.592716	1.22909e-21	4.45258e-21	EFG17068.1	succinate CoA transferase [Phocaeicola vulgatus PC510]	20.9104	none
FHJOOPKJ_03980	136.333	113	340.283	210.217	0.592318	0.000562403	0.000901462	WP_016270774.1	NVEALA domain-containing protein [Phocaeicola vulgatus]	3.24995	none
FHJOOPKJ_03272	46.3333	38.3333	35.3767	22.0367	0.592209	0.013251	0.0184073	WP_075964296.1	MULTISPECIES: hypothetical protein [Bacteroidales]	1.87775	none
FHJOOPKJ_03072	3214.33	2675.33	441.92	284.933	0.591071	6.22552e-17	1.92687e-16	WP_117700039.1	MULTISPECIES: dihydrolipoyl dehydrogenase [Bacteroidaceae]	16.2058	none
FHJOOPKJ_02093	2879.33	2391.67	737.573	472.887	0.58916	5.56822e-12	1.40717e-11	WP_005846598.1	MULTISPECIES: M48 family metallopeptidase [Bacteroidaceae]	11.2543	none
FHJOOPKJ_01889	298	249	99.15	63.11	0.583559	1.27193e-05	2.26924e-05	WP_074783350.1	MULTISPECIES: response regulator transcription factor [Bacteroidaceae]	4.89554	none
FHJOOPKJ_03393	281	234.333	53.6933	33.5933	0.583017	3.76727e-06	6.98902e-06	WP_118420478.1	MULTISPECIES: DUF3575 domain-containing protein [Bacteroidales]	5.42397	none
FHJOOPKJ_01068	151.667	126.667	330.653	204.23	0.58088	1.01514e-05	1.82179e-05	ALK84317.1	hypothetical protein BvMPK_1713 [Phocaeicola vulgatus]	4.99347	none
FHJOOPKJ_01947	1599	1344.33	543.69	347.313	0.5807	3.62542e-14	1.0099e-13	WP_005853566.1	MULTISPECIES: PorT family protein [Bacteroidaceae]	13.4406	none
FHJOOPKJ_01894	24	20	7.31667	4.66667	0.579673	0.114055	0.141301	WP_005846790.1	MULTISPECIES: iron-sulfur cluster repair di-iron protein [Bacteroidaceae]	0.942885	none
FHJOOPKJ_03080	313	261.333	71.1767	45.87	0.577499	4.28473e-06	7.93301e-06	WP_016271758.1	MULTISPECIES: zinc ABC transporter substrate-binding protein [Bacteroidaceae]	5.36808	none
FHJOOPKJ_00426	18.3333	15.3333	3.87333	2.50333	0.576563	0.166668	0.200931	WP_007832373.1	MULTISPECIES: glycosyltransferase [Bacteroidaceae]	0.778147	none
FHJOOPKJ_01650	334.667	281.333	120.757	77.67	0.57548	4.03726e-07	7.9089e-07	SPU31426.1	Uncharacterised protein [Bacteroides thetaiotaomicron]	6.39391	none
FHJOOPKJ_04169	6421.67	5397.67	1315.61	852.113	0.575454	1.31383e-18	4.30568e-18	WP_005842896.1	MULTISPECIES: class I mannose-6-phosphate isomerase [Bacteroidaceae]	17.8815	none
FHJOOPKJ_02074	337	282.667	27.7167	18.0967	0.573591	6.44355e-07	1.25161e-06	WP_005840122.1	MULTISPECIES: family 20 glycosylhydrolase [Bacteroidaceae]	6.19087	none	PUL31	GH20
FHJOOPKJ_01228	132	111.667	115.993	72.81	0.571325	0.000284042	0.00046856	ABR39019.1	hypothetical protein BVU_1330 [Phocaeicola vulgatus ATCC 8482]	3.54662	none
FHJOOPKJ_01783	226.667	190.667	54.4	35.3767	0.569017	1.92439e-05	3.40847e-05	WP_005850728.1	MULTISPECIES: ion transporter [Bacteroidaceae]	4.71571	none	PUL26	Unk
FHJOOPKJ_00276	1150.67	972.333	153.143	100.243	0.568236	2.37049e-15	6.90127e-15	WP_117696340.1	sigma-54 dependent transcriptional regulator [Phocaeicola vulgatus]	14.6252	none
FHJOOPKJ_03276	35.6667	30	6.21667	4.04333	0.568053	0.0424721	0.055775	WP_075964298.1	MULTISPECIES: sigma-54 dependent transcriptional regulator [Bacteroidales]	1.3719	none
FHJOOPKJ_02593	33.3333	28.3333	6.95667	4.47667	0.566945	0.0673407	0.085857	WP_005843888.1	MULTISPECIES: metallophosphoesterase [Bacteroidaceae]	1.17172	none
FHJOOPKJ_00422	416	352	99.0967	64.65	0.563585	3.85128e-09	8.42424e-09	WP_005843132.1	MULTISPECIES: ABC transporter permease [Bacteroidaceae]	8.41439	none
FHJOOPKJ_01318	1618	1375.33	243.883	159.777	0.562617	1.25202e-15	3.69477e-15	WP_032953086.1	anaerobic sulfatase-maturation protein [Phocaeicola vulgatus]	14.9024	none
FHJOOPKJ_00214	474.667	404	137.23	89.34	0.561096	7.8971e-05	0.000135437	CUP46157.1	outer membrane insertion signal domain-containing protein [Phocaeicola vulgatus]	4.10253	none	PUL6	susC
FHJOOPKJ_02150	1822.67	1548	243.097	160.023	0.55956	1.69505e-16	5.18097e-16	WP_005844029.1	MULTISPECIES: tRNA (N6-isopentenyl adenosine(37)-C2)-methylthiotransferase MiaB [Bacteroidaceae]	15.7708	none
FHJOOPKJ_03441	10.3333	8.66667	4.52	3.02	0.559091	0.251931	0.293056	WP_008782139.1	MULTISPECIES: DUF3575 domain-containing protein [Bacteroidaceae]	0.598719	none
FHJOOPKJ_04207	8.66667	7.33333	8.64333	5.38333	0.557872	0.352719	0.398815	WP_004312010.1	MULTISPECIES: IS66 family insertion sequence element accessory protein TnpB [Bacteria]	0.452571	none
FHJOOPKJ_04095	470.333	401.333	114.893	74.84	0.557394	4.2925e-09	9.37263e-09	WP_032952864.1	DUF3298 and DUF4163 domain-containing protein [Phocaeicola vulgatus]	8.36729	none
FHJOOPKJ_02900	341.333	290	75.57	49.3667	0.556681	1.13654e-07	2.29744e-07	WP_016271914.1	MULTISPECIES: glutaminase [Bacteroidaceae]	6.94442	none
FHJOOPKJ_01510	20	16.3333	64.88	42.7367	0.55655	0.267384	0.309076	WP_229035893.1	hypothetical protein [Phocaeicola vulgatus]	0.572865	none
FHJOOPKJ_04181	39	34	4.93333	3.24667	0.555435	0.272878	0.315031	CUN53470.1	Uncharacterised protein [Phocaeicola vulgatus]	0.564031	none
FHJOOPKJ_03839	60.6667	51.6667	4.20667	2.78333	0.555028	0.0261848	0.0352422	WP_117700338.1	DUF5110 domain-containing protein [Phocaeicola vulgatus]	1.58195	none	PUL52	GH31
FHJOOPKJ_00940	3930.33	3373.67	296.133	195.87	0.549752	2.17338e-16	6.61003e-16	WP_005845799.1	MULTISPECIES: RelA/SpoT family protein [Bacteroidaceae]	15.6629	none
FHJOOPKJ_01144	2695.67	2304	647.543	424.347	0.549203	6.61946e-17	2.04708e-16	WP_117699776.1	Rpn family recombination-promoting nuclease/putative transposase [Phocaeicola vulgatus]	16.1792	none
FHJOOPKJ_00400	120.667	103.333	22.0533	14.59	0.546746	0.000166243	0.000279631	ALK86076.1	Choloylglycine hydrolase [Phocaeicola vulgatus]	3.77926	none
FHJOOPKJ_03374	4795.67	4120	1038.43	686.663	0.546618	3.06286e-17	9.56038e-17	WP_005847425.1	MULTISPECIES: OadG family protein [Bacteroidaceae]	16.5139	none
FHJOOPKJ_00352	9	7.66667	1.69	1.11333	0.546225	0.271705	0.313775	WP_074783154.1	MULTISPECIES: nucleotidyltransferase family protein [Phocaeicola]	0.565902	none
FHJOOPKJ_00175	342.333	293.333	128.723	84.3767	0.544975	1.65247e-06	3.12076e-06	WP_005845633.1	MULTISPECIES: cytidylate kinase-like family protein [Bacteroidaceae]	5.78187	none
FHJOOPKJ_02774	37.3333	32.3333	457.803	301.607	0.544183	0.112467	0.139427	CUP11955.1	Uncharacterised protein [Phocaeicola vulgatus]	0.948975	none
FHJOOPKJ_00404	4570	3927	910.183	605.11	0.544092	2.91671e-16	8.79078e-16	ALK86072.1	Malonyl CoA-acyl carrier protein transacylase [Phocaeicola vulgatus]	15.5351	none
FHJOOPKJ_02870	286.333	247.333	172.193	110.56	0.543989	1.91611e-05	3.39544e-05	WP_005846300.1	MULTISPECIES: 23S rRNA (pseudouridine(1915)-N(3))-methyltransferase RlmH [Bacteroidaceae]	4.71758	none
FHJOOPKJ_02408	709	606.333	303.577	199.393	0.541968	1.00893e-08	2.15939e-08	WP_005847199.1	MULTISPECIES: LemA family protein [Bacteroidaceae]	7.99614	none
FHJOOPKJ_00737	2192	1892.33	680.93	447.097	0.541753	3.77569e-15	1.08973e-14	BDC07339.1	membrane protein [Phocaeicola vulgatus]	14.423	none
FHJOOPKJ_03719	106.333	91	153.87	99.8133	0.539848	0.00267783	0.00399609	KDS28857.1	iron-containing alcohol dehydrogenase family protein [Phocaeicola vulgatus str. 3775 SR(B) 19]	2.57222	none
FHJOOPKJ_00273	1686	1453	260.763	173.98	0.538547	1.13877e-12	2.97602e-12	WP_110506442.1	MULTISPECIES: insulinase family protein [Bacteroidaceae]	11.9436	none
FHJOOPKJ_00943	803	693.667	182.99	121.45	0.537545	4.22917e-12	1.07468e-11	WP_005845804.1	MULTISPECIES: ParB/RepB/Spo0J family partition protein [Bacteroidaceae]	11.3737	none
FHJOOPKJ_00413	174.333	151.333	43.58	28.8367	0.536965	0.000602076	0.0009617	WP_008671367.1	MULTISPECIES: glycosyltransferase family 2 protein [Bacteroidaceae]	3.22035	none
FHJOOPKJ_00154	352.333	305.667	297.307	189.713	0.536739	0.000146637	0.000247445	WP_011964677.1	MULTISPECIES: hypothetical protein [Phocaeicola]	3.83376	none
FHJOOPKJ_00869	134.333	116.333	44.88	29.5033	0.53597	0.000555561	0.000891662	WP_057279259.1	polysaccharide deacetylase family protein [Phocaeicola vulgatus]	3.25527	none
FHJOOPKJ_01545	2645.67	2281.67	710.973	470.877	0.535682	2.3633e-16	7.16986e-16	WP_005841501.1	MULTISPECIES: RnfABCDGE type electron transport complex subunit G [Bacteroidaceae]	15.6265	none
FHJOOPKJ_02936	841	724.667	119.95	80.38	0.534787	1.17899e-08	2.50877e-08	WP_016270373.1	anaerobic C4-dicarboxylate transporter [Phocaeicola vulgatus]	7.92849	none
FHJOOPKJ_02800	43.3333	37	6.66667	4.5	0.532896	0.0721648	0.0917849	WP_074704924.1	tyrosine-type recombinase/integrase [Bacteroides xylanisolvens]	1.14167	none
FHJOOPKJ_03792	46.6667	40.3333	9.12667	6.09333	0.531867	0.0164852	0.0227196	WP_057099376.1	endonuclease/exonuclease/phosphatase family protein [Phocaeicola vulgatus]	1.78291	none
FHJOOPKJ_01658	3350	2871.33	470.223	315.527	0.531559	2.44166e-08	5.11566e-08	WP_032953049.1	FimB/Mfa2 family fimbrial subunit [Phocaeicola vulgatus]	7.61231	none
FHJOOPKJ_01566	15	13	9.47667	6.12	0.531216	0.154135	0.187047	EET16205.2	hypothetical protein BSFG_02352 [Bacteroides sp. 4_3_47FAA]	0.812099	none
FHJOOPKJ_00941	905.333	785.333	133.923	89.54	0.53079	5.77158e-11	1.39436e-10	WP_005845800.1	MULTISPECIES: lytic transglycosylase domain-containing protein [Bacteroidaceae]	10.2387	none
FHJOOPKJ_01708	1382.67	1199.67	131.33	88.03	0.529713	3.46006e-11	8.44797e-11	WP_005840483.1	MULTISPECIES: SLC13 family permease [Bacteroidaceae]	10.4609	none
FHJOOPKJ_00761	832.667	723	61.1767	41.1467	0.529206	4.31806e-12	1.095e-11	WP_074783806.1	FtsX-like permease family protein [Phocaeicola vulgatus]	11.3647	none
FHJOOPKJ_02089	799.333	693.333	99.7833	67.4333	0.528491	3.0149e-09	6.64217e-09	WP_117699640.1	altronate dehydratase family protein [Phocaeicola vulgatus]	8.52073	none
FHJOOPKJ_03632	24	21	21.23	13.5367	0.527736	0.105315	0.131003	OKZ04926.1	terminase [Bacteroides sp. 41_26]	0.977508	none
FHJOOPKJ_00245	490.333	427.333	231.36	151.62	0.527295	2.67189e-08	5.58213e-08	ABR38061.1	conserved hypothetical protein [Phocaeicola vulgatus ATCC 8482]	7.57318	none
FHJOOPKJ_00315	109	94.3333	11.2133	7.61667	0.523582	0.00145215	0.00223319	WP_005847079.1	MULTISPECIES: phosphoethanolamine transferase [Bacteroidaceae]	2.83799	none
FHJOOPKJ_01523	866	753.667	534.81	365.017	0.523316	5.61533e-09	1.21743e-08	EFG18413.1	putative oxidoreductase [Phocaeicola vulgatus PC510]	8.25063	none
FHJOOPKJ_02178	5641.67	4922	2402.35	1599.52	0.523102	1.00648e-16	3.09694e-16	WP_005844074.1	MULTISPECIES: rubrerythrin family protein [Bacteroidaceae]	15.9972	none
FHJOOPKJ_01591	2873.33	2502.67	490.66	329.087	0.523056	1.74287e-17	5.51508e-17	WP_005842569.1	ABC transporter substrate-binding protein [Phocaeicola vulgatus]	16.7587	none
FHJOOPKJ_02203	22	19	1.36333	0.93	0.520063	0.168837	0.203412	WP_151881841.1	M64 family metallo-endopeptidase [Bacteroides uniformis]	0.772532	none
FHJOOPKJ_03009	823.333	721.333	233.113	156.643	0.51896	1.87293e-08	3.94205e-08	WP_227225089.1	S41 family peptidase [Phocaeicola vulgatus]	7.72748	none
FHJOOPKJ_03488	362.333	317.333	70.2367	47.2	0.51863	1.44801e-06	2.75018e-06	WP_005844454.1	MULTISPECIES: hypothetical protein [Bacteroidaceae]	5.83923	none
FHJOOPKJ_03324	7	6	0.583333	0.4	0.515588	0.454479	0.501686	WP_117699574.1	RagB/SusD family nutrient uptake outer membrane protein [Phocaeicola vulgatus]	0.342487	none	PUL47	susD
FHJOOPKJ_02914	391	343	125.47	83.8733	0.515461	1.1559e-06	2.20907e-06	WP_008668454.1	MULTISPECIES: NAD-dependent deacylase [Bacteroidaceae]	5.93708	none
FHJOOPKJ_03838	25.6667	22.3333	2.35667	1.62333	0.514901	0.0911737	0.114379	EET15421.1	hypothetical protein BSFG_01568 [Bacteroides sp. 4_3_47FAA]	1.04013	none	PUL52	GH97
FHJOOPKJ_00944	1016.33	894.667	285.537	191.917	0.513385	1.27539e-10	3.03143e-10	ALK83751.1	Chromosome (plasmid) partitioning protein ParA [Phocaeicola vulgatus]	9.89436	none
FHJOOPKJ_01911	13.3333	11.6667	61.3133	39.73	0.511651	0.211377	0.25064	KAB5482664.1	hypothetical protein F9002_13535 [Phocaeicola vulgatus]	0.674942	none
FHJOOPKJ_00354	17.3333	15.3333	3.57333	2.36	0.510797	0.16121	0.194605	TSE49931.1	oxidoreductase family, NAD-binding Rossmann fold [Phocaeicola vulgatus]	0.792609	none
FHJOOPKJ_01029	325.667	284	47.2867	32.18	0.510307	0.000173859	0.00029151	ALK83846.1	Ketol-acid reductoisomerase [Phocaeicola vulgatus]	3.7598	none
FHJOOPKJ_02592	45	39.3333	2.69667	1.85333	0.510065	0.0304107	0.0405292	WP_005843890.1	MULTISPECIES: TonB-dependent receptor [Bacteroidaceae]	1.51697	none
FHJOOPKJ_00305	89.3333	79	166.96	107.547	0.506119	0.00241097	0.00362138	WP_007832151.1	MULTISPECIES: YtxH domain-containing protein [Bacteroidaceae]	2.61781	none
FHJOOPKJ_00510	233.667	207	142.53	93.93	0.505414	3.02913e-05	5.31906e-05	WP_005839403.1	MULTISPECIES: NfeD family protein [Bacteroidaceae]	4.51868	none
FHJOOPKJ_02866	1878.33	1668.67	740.487	498.083	0.505285	1.52344e-07	3.04771e-07	WP_005848506.1	MULTISPECIES: OmpH family outer membrane protein [Bacteroidaceae]	6.81717	none
FHJOOPKJ_00418	829.333	736.667	138.057	94.15	0.502737	9.87671e-08	2.00423e-07	WP_012055969.1	glycosyltransferase family 4 protein [Phocaeicola vulgatus]	7.00539	none
FHJOOPKJ_00717	21269.7	18810.7	1800.62	1234.98	0.501069	2.507e-17	7.88557e-17	WP_005852530.1	MULTISPECIES: alpha amylase C-terminal domain-containing protein [Bacteroidaceae]	16.6008	none
FHJOOPKJ_00052	45.3333	40	2.45	1.7	0.500559	0.023544	0.031816	WP_005843104.1	MULTISPECIES: TonB-dependent receptor [Bacteroidaceae]	1.62812	none	PUL2	susC
FHJOOPKJ_04122	210.667	186.667	57.4933	39.09	0.499473	0.000204275	0.000340181	WP_005846001.1	MULTISPECIES: Cof-type HAD-IIB family hydrolase [Bacteroidaceae]	3.68978	none
FHJOOPKJ_02109	19.6667	17.3333	4.06667	2.81333	0.498038	0.135742	0.166098	WP_117699644.1	winged helix-turn-helix domain-containing protein [Phocaeicola vulgatus]	0.867286	none
FHJOOPKJ_02425	100.667	89.6667	119.447	77.79	0.49688	0.00273074	0.0040734	WP_118357989.1	SH3 beta-barrel fold-containing protein [Bacteroides uniformis]	2.56372	none
FHJOOPKJ_00125	2182.67	1938.67	382.877	261.383	0.495901	2.01285e-14	5.67145e-14	WP_005843627.1	MULTISPECIES: efflux RND transporter periplasmic adaptor subunit [Bacteroidaceae]	13.6962	none
FHJOOPKJ_00377	334.333	294	409.507	273.537	0.494405	0.000269566	0.000445281	WP_005851414.1	MULTISPECIES: nucleotidyltransferase domain-containing protein [Bacteroidaceae]	3.56933	none
FHJOOPKJ_00425	365	323.333	93.5367	63.9133	0.491898	2.48343e-05	4.37336e-05	WP_005843135.1	MULTISPECIES: glycosyltransferase [Bacteroidaceae]	4.60495	none
FHJOOPKJ_03188	161.667	143.667	19.6	13.5233	0.491771	0.000616497	0.0009826	WP_008668390.1	MULTISPECIES: hypothetical protein [Bacteroidaceae]	3.21007	none	PUL44	Unk
FHJOOPKJ_04077	915.333	820.333	239.047	162.763	0.490987	1.95462e-08	4.10927e-08	WP_057280067.1	purine-nucleoside phosphorylase [Phocaeicola vulgatus]	7.70894	none
FHJOOPKJ_04133	327.333	291.667	132.313	89.65	0.490422	1.11843e-05	2.00217e-05	WP_117589363.1	MULTISPECIES: clindamycin resistance transfer factor btgA [Bacteroidales]	4.95139	none
FHJOOPKJ_03979	86.3333	77	17.1333	11.7433	0.489913	0.00832285	0.0118479	WP_022508243.1	MULTISPECIES: winged helix-turn-helix domain-containing protein [Bacteroidaceae]	2.07973	none
FHJOOPKJ_01283	257.667	230.333	28.6533	19.8033	0.4888	6.85836e-05	0.000118173	WP_117699662.1	DUF6377 domain-containing protein [Phocaeicola vulgatus]	4.16378	none
FHJOOPKJ_01506	270.667	245.333	209.6	139.497	0.488486	0.00512573	0.00743483	WP_195610297.1	putative toxin-antitoxin system toxin component, PIN family [Phocaeicola vulgatus]	2.29024	none
FHJOOPKJ_00148	2105	1862.67	353.033	244.177	0.488317	8.42895e-08	1.71803e-07	WP_115649079.1	MULTISPECIES: PCMD domain-containing protein [Bacteroidaceae]	7.07423	none
FHJOOPKJ_03137	12603.7	11279.7	1777.31	1225.48	0.48804	6.46767e-15	1.85359e-14	ALK84892.1	Inositol-1-phosphate synthase [Phocaeicola vulgatus]	14.1893	none
FHJOOPKJ_00829	280.333	252.667	32.4133	22.41	0.483268	8.33418e-05	0.000142667	WP_117699463.1	sulfatase [Phocaeicola vulgatus]	4.07914	none
FHJOOPKJ_04037	310.667	279.333	76.6733	52.7933	0.482711	6.86879e-05	0.000118298	WP_005853691.1	MULTISPECIES: DUF3316 domain-containing protein [Bacteroidaceae]	4.16312	none
FHJOOPKJ_00024	29	26	5.93333	4.09	0.48141	0.080762	0.102049	WP_117699505.1	FecR domain-containing protein [Phocaeicola vulgatus]	1.09279	none
FHJOOPKJ_00365	7	6.33333	1.63333	1.08667	0.480141	0.414413	0.462457	WP_181980734.1	hypothetical protein [Phocaeicola vulgatus]	0.382567	none
FHJOOPKJ_03372	1732	1552	1328.31	897.437	0.480002	2.66797e-10	6.22865e-10	WP_005847427.1	MULTISPECIES: methylmalonyl-CoA epimerase [Bacteroidaceae]	9.57382	none
FHJOOPKJ_00030	86.6667	77.6667	74.2933	50.7967	0.478535	0.0332544	0.0441751	ALK86392.1	Transcriptional repressor, BlaI/MecI family [Phocaeicola vulgatus]	1.47815	none	PUL2	Unk
FHJOOPKJ_03278	691.333	619.333	426.36	296.14	0.478495	8.57014e-08	1.74487e-07	WP_005844155.1	MULTISPECIES: VTT domain-containing protein [Bacteroidaceae]	7.06701	none
FHJOOPKJ_00873	544.667	487.333	1024.54	687.913	0.476515	6.04961e-06	1.10394e-05	WP_117699484.1	phosphopantetheine-binding protein [Phocaeicola vulgatus]	5.21827	none
FHJOOPKJ_00462	37.6667	34	7.16333	4.91333	0.476327	0.0549877	0.0710434	WP_016270498.1	histidine kinase [Phocaeicola vulgatus]	1.25973	none
FHJOOPKJ_01355	270.333	245	38.1067	26.4133	0.475955	0.000363358	0.00059328	WP_005850920.1	MULTISPECIES: acyloxyacyl hydrolase [Bacteroidaceae]	3.43967	none
FHJOOPKJ_01114	853	764.333	172.503	119.61	0.47468	7.40798e-08	1.51581e-07	WP_005846163.1	MULTISPECIES: Gfo/Idh/MocA family oxidoreductase [Bacteroidaceae]	7.1303	none
FHJOOPKJ_03550	447.333	404	113.84	79.75	0.474012	3.03677e-07	5.99688e-07	WP_005840947.1	hypothetical protein [Phocaeicola vulgatus]	6.51759	none
FHJOOPKJ_00035	37.3333	33.6667	6.66333	4.59667	0.4738	0.0388663	0.0512227	WP_008670273.1	MULTISPECIES: serine hydrolase [Bacteroidaceae]	1.41043	none	PUL2	Unk
FHJOOPKJ_01636	136.667	123	51.7733	35.6033	0.47358	0.00325211	0.00482372	WP_117699615.1	DUF2975 domain-containing protein [Phocaeicola vulgatus]	2.48784	none
FHJOOPKJ_01056	10	9	2.54333	1.73333	0.473312	0.344156	0.389973	ALK84332.1	putative transcriptional regulatory protein [Phocaeicola vulgatus]	0.463245	none
FHJOOPKJ_00512	1687	1524	394.003	273.353	0.4725	1.52211e-10	3.60155e-10	WP_005839407.1	MULTISPECIES: nucleoside phosphorylase [Bacteroidaceae]	9.81755	none
FHJOOPKJ_02587	201	183	38.77	26.7867	0.470855	0.000669567	0.00106442	BDC05219.1	L,D-transpeptidase [Phocaeicola vulgatus]	3.17421	none
FHJOOPKJ_03624	13.3333	12	35.2533	23.1733	0.469963	0.245939	0.287268	WP_007839768.1	MULTISPECIES: hypothetical protein [Bacteroidaceae]	0.609172	none
FHJOOPKJ_02113	6.33333	5.66667	18.57	12.4567	0.468828	0.459222	0.506011	BDC07012.1	hypothetical protein GAIMETA21S03_28950 [Phocaeicola vulgatus]	0.337978	none
FHJOOPKJ_02410	2820	2555.67	384.703	269.313	0.468795	4.67537e-11	1.13549e-10	WP_117699858.1	dipeptidase [Phocaeicola vulgatus]	10.3302	none
FHJOOPKJ_03612	7	6.33333	17.0133	11.04	0.468483	0.39208	0.439401	WP_117889426.1	hypothetical protein [Phocaeicola vulgatus]	0.406626	none
FHJOOPKJ_03201	1692	1532	863.363	597.483	0.468385	2.4403e-10	5.71439e-10	WP_005843483.1	MULTISPECIES: porin family protein [Bacteroidaceae]	9.61256	none
FHJOOPKJ_02154	171	155	19.1167	13.4	0.467021	0.000177604	0.000297247	ALK83518.1	putative ATP-binding ABC transporter protein [Phocaeicola vulgatus]	3.75055	none	PUL32	Unk
FHJOOPKJ_00831	190.667	172.333	25.7567	18.0533	0.466082	0.000574024	0.000918889	WP_117699465.1	alpha-L-fucosidase [Phocaeicola vulgatus]	3.24107	none	PUL13	GH29
FHJOOPKJ_02875	784.667	717	322.237	222.85	0.464737	5.3874e-06	9.88496e-06	WP_005848491.1	MULTISPECIES: DUF4923 family protein [Bacteroidaceae]	5.26862	none
FHJOOPKJ_00216	560.333	509	88.55	62.3	0.464272	6.14041e-07	1.19336e-06	WP_005845174.1	MULTISPECIES: mechanosensitive ion channel [Bacteroidaceae]	6.2118	none
FHJOOPKJ_00217	269	243.333	14.3233	10.11	0.46287	0.000485359	0.000782747	WP_119064328.1	multidrug efflux RND transporter permease subunit [Phocaeicola vulgatus]	3.31394	none
FHJOOPKJ_02409	2229.67	2026	401.183	282.103	0.461066	1.43366e-11	3.56669e-11	ALK84765.1	Chorismate synthase [Phocaeicola vulgatus]	10.8436	none
FHJOOPKJ_01163	978.667	888	51.5667	36.4767	0.460387	5.72367e-08	1.17773e-07	WP_117700119.1	response regulator [Phocaeicola vulgatus]	7.24233	none
FHJOOPKJ_00265	136	123.333	14.9267	10.54	0.458694	0.00902828	0.0127779	WP_117814679.1	DUF5060 domain-containing protein [Phocaeicola vulgatus]	2.04439	none
FHJOOPKJ_02641	1170.67	1066	1279.36	873.207	0.457303	1.26387e-09	2.84583e-09	ALK83201.1	hypothetical protein BvMPK_0573 [Phocaeicola vulgatus]	8.8983	none
FHJOOPKJ_00155	1937.67	1767.33	276.31	195.647	0.456796	4.14697e-12	1.05525e-11	WP_005845587.1	MULTISPECIES: DUF3440 domain-containing protein [Bacteroidaceae]	11.3823	none
FHJOOPKJ_03859	201.333	184	101.327	69.7633	0.456071	0.00125159	0.00193772	WP_005846450.1	MULTISPECIES: alpha-ribazole phosphatase [Bacteroidaceae]	2.90254	none
FHJOOPKJ_00129	2473.67	2259.33	323.063	228.027	0.455997	5.1892e-11	1.25614e-10	WP_117699924.1	iron-containing alcohol dehydrogenase [Phocaeicola vulgatus]	10.2849	none
FHJOOPKJ_01521	784.667	712	124.317	86.01	0.455929	1.65166e-06	3.12076e-06	WP_008671264.1	MULTISPECIES: replication-associated recombination protein A [Bacteroidaceae]	5.78208	none
FHJOOPKJ_00424	277.333	252	61.04	43.3667	0.454563	0.000366777	0.000598332	WP_134855267.1	glycosyl transferase [Phocaeicola vulgatus]	3.4356	none
FHJOOPKJ_01694	265	243	25.0667	17.7767	0.451262	3.66133e-05	6.40166e-05	EET17404.1	cation transport protein [Bacteroides sp. 4_3_47FAA]	4.43636	none
FHJOOPKJ_00306	16.6667	15	96.9867	67.41	0.451188	0.315835	0.361108	EEB27061.1	hypothetical protein BACDOR_00748 [Phocaeicola dorei DSM 17855]	0.50054	none
FHJOOPKJ_04215	1741	1597	167.29	118.353	0.449615	3.99163e-10	9.23097e-10	WP_005656863.1	MULTISPECIES: reverse transcriptase/maturase family protein [Bacteroidales]	9.39885	none
FHJOOPKJ_00856	157.333	144.667	17.8167	12.68	0.447453	0.000598084	0.000955739	WP_117699494.1	tetratricopeptide repeat protein [Phocaeicola vulgatus]	3.22324	none
FHJOOPKJ_02406	1316.67	1209.33	284	200.873	0.446732	2.44148e-10	5.71439e-10	WP_117699859.1	alpha/beta hydrolase [Phocaeicola vulgatus]	9.61235	none
FHJOOPKJ_03350	519	476	139.41	98.5767	0.445433	7.08917e-06	1.28598e-05	WP_008670194.1	MULTISPECIES: glycoside hydrolase family 16 protein [Bacteroidaceae]	5.1494	none	PUL48	GH16_3
FHJOOPKJ_00355	12.3333	11.3333	2.41	1.64333	0.445241	0.311141	0.356074	TSE49932.1	acyltransferase family protein [Phocaeicola vulgatus]	0.507043	none
FHJOOPKJ_00166	406.667	376	38.3667	27.2833	0.443969	0.000307495	0.000505436	WP_057280187.1	M56 family metallopeptidase [Phocaeicola vulgatus]	3.51216	none
FHJOOPKJ_02145	196	180	408.713	278.147	0.443734	0.000431643	0.000699186	WP_005844019.1	MULTISPECIES: DUF3098 domain-containing protein [Bacteroidaceae]	3.36487	none
FHJOOPKJ_00399	213.667	196.667	136.56	94.3233	0.442601	0.000822677	0.00129218	WP_008671383.1	MULTISPECIES: hypothetical protein [Bacteroidaceae]	3.08477	none
FHJOOPKJ_03602	15.6667	14.3333	1.68	1.21333	0.442438	0.266064	0.307937	WP_005822175.1	MULTISPECIES: exo-alpha-sialidase [Bacteroidaceae]	0.575014	none	PUL49	GH33
FHJOOPKJ_02413	144	133.333	174.017	119.627	0.440335	0.00391827	0.0057653	WP_110506458.1	MULTISPECIES: hypothetical protein [Bacteroidaceae]	2.40691	none
FHJOOPKJ_01034	1646	1516.67	162.703	116.143	0.439839	3.2874e-09	7.21227e-09	WP_117699399.1	DNA polymerase III subunit gamma/tau [Phocaeicola vulgatus]	8.48315	none
FHJOOPKJ_03619	42	39	9.03667	6.33667	0.439653	0.0728276	0.0925958	OKZ35511.1	hypothetical protein BHV79_06490 [Bacteroides uniformis]	1.1377	none
FHJOOPKJ_01593	420	386.333	83.7333	60.0133	0.438978	0.000403435	0.000655515	WP_074783588.1	ABC transporter ATP-binding protein [Phocaeicola vulgatus]	3.39423	none
FHJOOPKJ_02571	2334.33	2152.33	134.283	96.3933	0.438902	4.85435e-10	1.11629e-09	KAB6449557.1	DNA polymerase I [Phocaeicola vulgatus]	9.31387	none
FHJOOPKJ_01665	8969.67	8306.33	4730.81	3314.12	0.437872	3.82366e-09	8.36881e-09	WP_149943785.1	AraC family transcriptional regulator [Phocaeicola dorei]	8.41752	none
FHJOOPKJ_01895	519.667	480.333	35.6733	25.6267	0.43581	1.90082e-05	3.37159e-05	WP_057280862.1	glycoside hydrolase family 95 protein [Phocaeicola vulgatus]	4.72106	none
FHJOOPKJ_00156	652	603.667	341.937	240.45	0.435234	1.48306e-06	2.81383e-06	WP_005845588.1	MULTISPECIES: ParB/RepB/Spo0J family partition protein [Bacteroidaceae]	5.82884	none
FHJOOPKJ_01651	107	98.6667	84.2333	59.12	0.433925	0.0137341	0.0190639	WP_117699624.1	hypothetical protein [Phocaeicola vulgatus]	1.8622	none
FHJOOPKJ_01023	857	791.667	214.573	153.433	0.432071	5.47496e-07	1.06572e-06	WP_005845913.1	MULTISPECIES: mechanosensitive ion channel [Bacteroidaceae]	6.26162	none
FHJOOPKJ_04230	250614	233066	207694	144808	0.431401	1.20381e-12	3.14153e-12	EOA53087.1	hypothetical protein HMPREF1534_03161 [Phocaeicola massiliensis B84634 = Timone 84634 = DSM 17679 = JCM 13223]	11.9194	none
FHJOOPKJ_02683	349.667	323.333	108.587	77.6333	0.429681	0.00079421	0.0012496	WP_005844922.1	SDR family NAD(P)-dependent oxidoreductase [Phocaeicola vulgatus]	3.10006	none
FHJOOPKJ_03187	251.667	234	21.6133	15.5667	0.429378	0.000142793	0.00024118	WP_005848767.1	MULTISPECIES: hypothetical protein [Bacteroidaceae]	3.84529	none	PUL44	Unk
FHJOOPKJ_01155	278.667	258.667	41.7967	30.0733	0.428645	0.000181663	0.000303763	WP_117700116.1	Nramp family divalent metal transporter [Phocaeicola vulgatus]	3.74073	none
FHJOOPKJ_01198	14.3333	13.3333	2.26667	1.62333	0.428506	0.328264	0.373808	WP_025018485.1	MULTISPECIES: site-specific integrase [Phocaeicola]	0.483777	none
FHJOOPKJ_03095	78	73	558.683	388.59	0.428265	0.0304081	0.0405292	ALK84062.1	hypothetical protein BvMPK_1455 [Phocaeicola vulgatus]	1.51701	none
FHJOOPKJ_00489	14976.7	13979.3	891.77	644.927	0.426459	3.49335e-09	7.65954e-09	KDS26008.1	peptidase M16 inactive domain protein [Phocaeicola vulgatus str. 3775 SR(B) 19]	8.45676	none
FHJOOPKJ_02779	828.667	771.333	64	46.4033	0.423451	7.73463e-07	1.49371e-06	EFG16170.1	phospholipase, patatin family [Phocaeicola vulgatus PC510]	6.11156	none
FHJOOPKJ_01820	3335	3108.33	351.16	255.253	0.419222	1.07381e-09	2.42381e-09	WP_074783279.1	MULTISPECIES: glpgli family protein [Bacteroidaceae]	8.96907	none
FHJOOPKJ_03924	5823.67	5454.67	3147.37	2219.97	0.419001	2.86623e-10	6.68301e-10	WP_005844495.1	MULTISPECIES: OmpH family outer membrane protein [Bacteroidaceae]	9.54269	none
FHJOOPKJ_02516	155.333	145.667	70.22	50.0533	0.417685	0.00389319	0.00573069	WP_005852757.1	MULTISPECIES: flavodoxin family protein [Bacteroidaceae]	2.40969	none
FHJOOPKJ_00733	678.333	637.667	284.85	202.63	0.417032	1.51781e-06	2.87532e-06	ABR40965.1	flavoredoxin [Phocaeicola vulgatus ATCC 8482]	5.81878	none
FHJOOPKJ_01019	414.333	387	100.583	72.7267	0.416863	0.00069571	0.00110312	ALK83836.1	Lipoyl synthase [Phocaeicola vulgatus]	3.15757	none
FHJOOPKJ_02966	13.3333	12.6667	1.64	1.16333	0.416722	0.326281	0.371896	EEZ23508.1	tetratricopeptide repeat protein [Bacteroides sp. 3_1_33FAA]	0.486408	none	PUL39	susD
FHJOOPKJ_02368	5.33333	5	3.07	2.14333	0.415523	0.533536	0.578194	WP_005816141.1	MULTISPECIES: hypothetical protein [Bacteroidales]	0.272836	none
FHJOOPKJ_00001	1116.33	1049.33	623.503	444.743	0.412295	7.49417e-07	1.44879e-06	WP_005851070.1	MULTISPECIES: hypothetical protein [Bacteroidaceae]	6.12528	none
FHJOOPKJ_03961	479	451.333	109.493	79.0533	0.4117	9.91747e-06	1.78146e-05	ALK84275.1	Phosphate butyryltransferase [Phocaeicola vulgatus]	5.0036	none
FHJOOPKJ_01981	880.333	828.333	225.417	163.317	0.410926	1.77005e-06	3.33939e-06	WP_008667869.1	MULTISPECIES: hypothetical protein [Bacteroidaceae]	5.75201	none
FHJOOPKJ_00225	2243	2110	523.38	383.827	0.410189	3.59805e-10	8.34176e-10	WP_005840635.1	MULTISPECIES: electron transfer flavoprotein subunit beta/FixA family protein [Bacteroidaceae]	9.44393	none
FHJOOPKJ_01093	286.333	270.333	362.767	254.113	0.408994	0.000169271	0.000284466	WP_016276868.1	hypothetical protein [Phocaeicola sartorii]	3.77142	none
FHJOOPKJ_03375	2311.67	2178.33	1637.18	1171.13	0.408427	6.03081e-10	1.37906e-09	ABR40146.1	biotin carboxyl carrier protein [Phocaeicola vulgatus ATCC 8482]	9.21962	none
FHJOOPKJ_03547	937	881.333	260.713	188.04	0.407971	3.57574e-07	7.02351e-07	WP_008670880.1	MULTISPECIES: LuxR C-terminal-related transcriptional regulator [Bacteroidaceae]	6.44663	none
FHJOOPKJ_04078	1776.67	1681.67	331.203	241.51	0.406977	4.15835e-08	8.61908e-08	WP_008668304.1	MULTISPECIES: thiamine-phosphate kinase [Bacteroidaceae]	7.38108	none
FHJOOPKJ_00828	2344.33	2200.67	507.95	369.16	0.406046	1.12583e-07	2.27705e-07	WP_005850138.1	ribonuclease III [Phocaeicola vulgatus]	6.94853	none
FHJOOPKJ_03275	92	86.3333	7.00333	5.12	0.4052	0.037067	0.0489567	WP_009017372.1	hybrid sensor histidine kinase/response regulator [Bacteroides clarus]	1.43101	none
FHJOOPKJ_04156	1277.67	1209.33	111.283	81.8267	0.404077	4.23935e-08	8.78203e-08	WP_016270392.1	fructose-bisphosphatase class III [Phocaeicola vulgatus]	7.3727	none
FHJOOPKJ_00415	511.667	485.333	80.5733	58.6767	0.403892	4.20912e-05	7.342e-05	EET14726.2	glycosyltransferase, group 1 family protein [Bacteroides sp. 4_3_47FAA]	4.37581	none
FHJOOPKJ_02383	315.667	299.333	115.123	83.4833	0.402821	0.000409529	0.000665122	WP_005848207.1	MULTISPECIES: LPS export ABC transporter periplasmic protein LptC [Bacteroidaceae]	3.38772	none
FHJOOPKJ_03609	148.667	143	120.93	83.96	0.398333	0.0603036	0.077476	RHC70462.1	hypothetical protein DW837_01050 [Phocaeicola vulgatus]	1.21966	none
FHJOOPKJ_00323	32322.3	30802.3	5679.36	4157.65	0.397146	3.55208e-11	8.6669e-11	WP_032952366.1	OmpA family protein [Phocaeicola vulgatus]	10.4495	none
FHJOOPKJ_04200	6	5.66667	1.14667	0.856667	0.396173	0.547979	0.591927	WP_007754523.1	MULTISPECIES: site-specific integrase [Bacteroidales]	0.261236	none
FHJOOPKJ_00229	47.6667	44.6667	18.4233	13.6933	0.39604	0.145483	0.177308	WP_057279318.1	histidine decarboxylase [Phocaeicola vulgatus]	0.837189	none
FHJOOPKJ_00283	8156.67	7766.67	1114.44	821.01	0.395747	6.0053e-11	1.44892e-10	WP_005839734.1	MULTISPECIES: glucose-6-phosphate isomerase [Bacteroidaceae]	10.2215	none
FHJOOPKJ_04141	11264	10750	7060.2	5179.56	0.394894	4.86762e-11	1.17984e-10	WP_005841109.1	MULTISPECIES: helix-turn-helix domain-containing protein [Bacteroidaceae]	10.3127	none
FHJOOPKJ_00420	76.3333	72.3333	15.97	11.7567	0.394321	0.03096	0.0412463	WP_032952459.1	glycosyltransferase [Phocaeicola vulgatus]	1.5092	none
FHJOOPKJ_00933	281	267.333	127.233	92.7567	0.390151	0.00872595	0.0123977	WP_005845790.1	MULTISPECIES: RsmD family RNA methyltransferase [Bacteroidaceae]	2.05919	none
FHJOOPKJ_02882	1808.67	1728.67	239.707	177.217	0.389925	1.03076e-08	2.20355e-08	WP_074783777.1	FtsW/RodA/SpoVE family cell cycle protein [Phocaeicola vulgatus]	7.98684	none
FHJOOPKJ_03421	343.667	328.333	574.357	404.933	0.389572	6.38635e-05	0.000110195	WP_005851637.1	MULTISPECIES: antibiotic biosynthesis monooxygenase [Bacteroidaceae]	4.19475	none
FHJOOPKJ_00760	233	223	78.6	57.5233	0.387426	0.000711828	0.0011277	WP_005840005.1	MULTISPECIES: ABC transporter ATP-binding protein [Bacteroidaceae]	3.14762	none
FHJOOPKJ_00513	529.667	507.667	303.603	221.223	0.385948	1.10833e-05	1.98506e-05	WP_012055800.1	MULTISPECIES: GAF domain-containing protein [Phocaeicola]	4.95533	none
FHJOOPKJ_02344	7	6.66667	2.61333	1.92	0.384941	0.587782	0.630477	RGU63966.1	DNA resolvase [Paraprevotella clara]	0.230783	none
FHJOOPKJ_04072	437.333	419.667	72.72	54.08	0.381357	0.000249622	0.000413451	WP_057280070.1	glycerate kinase [Phocaeicola vulgatus]	3.60272	none
FHJOOPKJ_01693	175.667	169.333	57.2267	42.38	0.38089	0.0157112	0.0217018	WP_005841775.1	MULTISPECIES: TrkA family potassium uptake protein [Bacteroidaceae]	1.80379	none
FHJOOPKJ_01958	1000	960.667	184.523	137.353	0.380407	4.44475e-06	8.21686e-06	BDC05591.1	DUF4831 domain-containing protein [Phocaeicola vulgatus]	5.35215	none
FHJOOPKJ_03899	964.667	931	305.92	225.78	0.3794	3.55517e-05	6.21901e-05	WP_005847301.1	MULTISPECIES: SIMPL domain-containing protein [Bacteroidaceae]	4.44914	none
FHJOOPKJ_02411	1335.33	1278.33	508	376.533	0.378803	2.41596e-06	4.53008e-06	WP_016270169.1	MULTISPECIES: nitroreductase family protein [Bacteroidaceae]	5.61691	none
FHJOOPKJ_00034	61	59	3.87667	2.88	0.375163	0.0469714	0.0613331	WP_016270827.1	hypothetical protein [Phocaeicola vulgatus]	1.32817	none	PUL2	PL40
FHJOOPKJ_00826	2543.33	2450	5682.83	4019.48	0.374982	1.95001e-06	3.66949e-06	WP_005844276.1	MULTISPECIES: acyl carrier protein [Bacteroidaceae]	5.70996	none
FHJOOPKJ_01612	12886.7	12465.3	1102.78	822.41	0.372909	2.35578e-09	5.23395e-09	KAB3843786.1	M13 family metallopeptidase [Phocaeicola vulgatus]	8.62787	none
FHJOOPKJ_02740	9	8.66667	50.5933	36.1667	0.37179	0.604414	0.646431	SUV41654.1	Uncharacterised protein [Phocaeicola vulgatus]	0.218666	none
FHJOOPKJ_00908	7349	7122.67	847.34	639.837	0.371046	2.98189e-09	6.5734e-09	WP_016270937.1	plasmid pRiA4b ORF-3 family protein [Phocaeicola vulgatus]	8.52551	none
FHJOOPKJ_00488	3462.33	3346.67	747.5	559.073	0.368605	3.5204e-08	7.30916e-08	WP_005839361.1	MULTISPECIES: thioredoxin-disulfide reductase [Bacteroidaceae]	7.45341	none
FHJOOPKJ_01804	36.6667	36	3.55	2.63	0.367724	0.222094	0.262164	WP_117720500.1	aryl-sulfate sulfotransferase [Phocaeicola vulgatus]	0.653463	none	PUL27	Unk
FHJOOPKJ_00303	2863.67	2765.33	378.107	284.22	0.36631	1.96118e-05	3.46863e-05	WP_118327577.1	chorismate-binding protein [Phocaeicola vulgatus]	4.70748	none
FHJOOPKJ_00716	2580.33	2498.33	423.603	317.64	0.365877	1.13737e-07	2.29787e-07	WP_005852528.1	MULTISPECIES: DUF6057 family protein [Bacteroidaceae]	6.9441	none
FHJOOPKJ_03161	224	217.667	105.69	78.54	0.365823	0.00965003	0.0135899	WP_005844744.1	MULTISPECIES: DUF6452 family protein [Bacteroidaceae]	2.01547	none
FHJOOPKJ_01826	199.667	195	22.5	16.9233	0.364893	0.00996814	0.0140003	WP_005845771.1	MULTISPECIES: SusD family outer membrane lipoprotein NanU [Bacteroidaceae]	2.00139	none	PUL28	susD
FHJOOPKJ_03232	906	878.667	194.707	146.803	0.364291	3.68409e-06	6.84162e-06	WP_117678535.1	PD-(D/E)XK nuclease family transposase [Phocaeicola vulgatus]	5.43367	none
FHJOOPKJ_00227	840.667	819	756.29	548.277	0.363906	0.000123211	0.000208586	WP_005840639.1	MULTISPECIES: four helix bundle protein [Bacteroidaceae]	3.90935	none
FHJOOPKJ_02384	451.667	439.333	67.88	51.4467	0.363023	0.00134005	0.00206685	WP_005848208.1	MULTISPECIES: hemolysin family protein [Bacteroidaceae]	2.87288	none
FHJOOPKJ_00977	1434.33	1395	861.707	644.96	0.362781	4.74903e-07	9.27895e-07	ALK83789.1	Transcriptional regulator, AsnC family [Phocaeicola vulgatus]	6.32339	none
FHJOOPKJ_01659	1446.67	1407	287.847	214.807	0.362493	0.000348081	0.000569855	WP_016271088.1	MULTISPECIES: fimbrillin family protein [Bacteroidaceae]	3.45832	none
FHJOOPKJ_01767	9.66667	9.33333	6.01333	4.67333	0.360809	0.501183	0.547165	EET17482.2	hypothetical protein BSFG_03629 [Bacteroides sp. 4_3_47FAA]	0.300004	none
FHJOOPKJ_00490	1264.33	1236.33	153.28	114.84	0.3605	6.32499e-06	1.15134e-05	WP_012055789.1	MULTISPECIES: DUF5687 family protein [Bacteroidaceae]	5.19894	none
FHJOOPKJ_01524	861.667	840.333	2530.35	1835.67	0.356574	0.000148352	0.000250224	2L01_A	Chain A, Uncharacterized protein [Phocaeicola vulgatus ATCC 8482]	3.82871	none
FHJOOPKJ_01082	2242.67	2192	259.023	196.33	0.355771	6.76582e-07	1.31282e-06	WP_074783188.1	ATP-binding protein [Phocaeicola vulgatus]	6.16968	none
FHJOOPKJ_01031	43	41.6667	10.2733	7.81667	0.355091	0.226937	0.267536	WP_005845930.1	MULTISPECIES: FecR domain-containing protein [Bacteroidaceae]	0.644095	none
FHJOOPKJ_00159	631	617.333	148.497	112.313	0.354026	9.72813e-05	0.000166219	WP_005845594.1	MULTISPECIES: hypothetical protein [Bacteroidaceae]	4.01197	none
FHJOOPKJ_00875	355.667	348	240.007	178.793	0.353263	0.000261917	0.000433425	EFG17220.1	acyl-CoA thioester hydrolase, YbgC/YbaW family [Phocaeicola vulgatus PC510]	3.58184	none
FHJOOPKJ_00491	659	646	208.557	156.393	0.352355	5.07239e-05	8.81435e-05	WP_005839367.1	MULTISPECIES: ABC transporter ATP-binding protein [Bacteroidaceae]	4.29479	none
FHJOOPKJ_01477	5127	5008.67	531.157	406.303	0.351507	1.53684e-07	3.07285e-07	WP_117699450.1	MULTISPECIES: glutamine--tRNA ligase/YqeY domain fusion protein [Bacteroidaceae]	6.81337	none
FHJOOPKJ_03926	273.333	267.667	65.0433	49.49	0.350995	0.00825366	0.0117631	WP_057279275.1	MULTISPECIES: pyridoxamine kinase [Bacteroidaceae]	2.08335	none
FHJOOPKJ_01197	243.667	239.667	46.0667	35.2233	0.349384	0.00358752	0.00529985	WP_117700175.1	magnesium/cobalt transporter CorA [Phocaeicola vulgatus]	2.44521	none
FHJOOPKJ_03886	2321	2280.67	240.73	183.32	0.349284	1.7544e-05	3.11489e-05	WP_005843437.1	MULTISPECIES: tetratricopeptide repeat protein [Bacteroidaceae]	4.75587	none
FHJOOPKJ_03271	40.3333	39.3333	29.8633	22.2867	0.348291	0.280807	0.323069	WP_081415333.1	PepSY-like domain-containing protein [Parabacteroides massiliensis]	0.551592	none
FHJOOPKJ_03509	210	207	86.5167	65.1933	0.346376	0.018891	0.02588	WP_005816265.1	MULTISPECIES: hypothetical protein [Bacteria]	1.72375	none
FHJOOPKJ_02883	2252.67	2218.33	312.797	238.327	0.345057	1.39551e-07	2.80552e-07	WP_005845317.1	MULTISPECIES: UDP-N-acetylmuramoyl-L-alanine--D-glutamate ligase [Bacteroidaceae]	6.85527	none
FHJOOPKJ_01260	449.667	442	23.3633	17.9367	0.344239	0.000383023	0.00062428	WP_117699658.1	DUF4981 domain-containing protein [Phocaeicola vulgatus]	3.41678	none	PUL18	GH2
FHJOOPKJ_01053	357.667	353	57.3333	43.5467	0.344197	0.000623736	0.000993708	WP_008671032.1	MULTISPECIES: DUF418 domain-containing protein [Bacteroidaceae]	3.205	none
FHJOOPKJ_03273	38.3333	37.6667	14.0133	10.54	0.343542	0.22167	0.261832	WP_139322546.1	hypothetical protein [Parabacteroides massiliensis]	0.654292	none
FHJOOPKJ_03017	1958.67	1930.67	224.003	171.5	0.342696	6.43657e-06	1.17049e-05	WP_016270945.1	ATP-binding protein [Phocaeicola vulgatus]	5.19135	none
FHJOOPKJ_02560	368.333	363.667	38.8633	29.6767	0.340594	0.000810763	0.00127455	MBS5110736.1	hypothetical protein [Phocaeicola vulgatus]	3.09111	none
FHJOOPKJ_03077	404	399	158.47	120.11	0.340026	0.00149357	0.00229134	WP_100262962.1	polysaccharide deacetylase family protein [Phocaeicola vulgatus]	2.82577	none
FHJOOPKJ_00421	610	601.333	96.8167	74.13	0.339665	0.000587052	0.000938925	WP_005843131.1	MULTISPECIES: glycosyltransferase [Bacteroidaceae]	3.23132	none
FHJOOPKJ_02904	276.333	274.667	96.8033	73.33	0.337785	0.0104929	0.0147204	WP_005849586.1	MULTISPECIES: phosphatase PAP2 family protein [Bacteroidaceae]	1.97911	none
FHJOOPKJ_00378	369.333	364.667	727.997	533.05	0.337701	0.00221846	0.00334452	WP_007832281.1	HEPN domain-containing protein [Phocaeicola vulgatus]	2.65395	none
FHJOOPKJ_04206	39	38.6667	39.0167	29.1133	0.334437	0.146047	0.177938	WP_004319780.1	MULTISPECIES: IS66 family insertion sequence hypothetical protein [Bacteroidales]	0.835506	none
FHJOOPKJ_03079	295.333	294	85.21	64.7267	0.333601	0.00302216	0.00449352	WP_005844145.1	MULTISPECIES: metal ABC transporter ATP-binding protein [Bacteroidaceae]	2.51968	none
FHJOOPKJ_03365	1108.67	1095.67	215.707	165.69	0.333587	5.44897e-05	9.45088e-05	WP_005847434.1	MULTISPECIES: 2-hydroxyacid dehydrogenase [Bacteroidaceae]	4.26369	none
FHJOOPKJ_04106	10784	10725.7	1293.32	990.333	0.333363	5.14472e-08	1.06038e-07	ALK83852.1	2-isopropylmalate synthase [Phocaeicola vulgatus]	7.28864	none
FHJOOPKJ_01649	236	235.333	118.44	90.2767	0.332586	0.0243964	0.0329073	WP_117699623.1	hypothetical protein [Phocaeicola vulgatus]	1.61268	none
FHJOOPKJ_01905	2397.33	2368.67	186.013	142.803	0.332018	0.000164255	0.000276415	WP_172774266.1	DEAD/DEAH box helicase [Phocaeicola vulgatus]	3.78448	none
FHJOOPKJ_00509	951.333	948	119.587	91.7867	0.331115	4.24037e-05	7.39301e-05	MBT0710313.1	Anaphase-promoting complex, cyclosome, subunit 3 [Phocaeicola vulgatus]	4.3726	none
FHJOOPKJ_01960	2190	2186.67	1017.52	764.287	0.330715	2.42654e-06	4.54761e-06	ALK83005.1	hypothetical protein BvMPK_0371 [Phocaeicola vulgatus]	5.61501	none
FHJOOPKJ_02278	122	122	297.67	214.52	0.329645	0.0252425	0.0340238	WP_005839483.1	MULTISPECIES: hypothetical protein [Bacteroidaceae]	1.59787	none
FHJOOPKJ_04100	11.3333	11.3333	2.47	1.81333	0.328411	0.46115	0.507832	WP_117885359.1	phospholipase D-like domain-containing protein [Phocaeicola vulgatus]	0.336158	none
FHJOOPKJ_00309	2677.67	2668	185.29	143.027	0.328372	9.49361e-07	1.82478e-06	WP_117693869.1	prolyl oligopeptidase family serine peptidase [Phocaeicola vulgatus]	6.02257	none
FHJOOPKJ_02967	13	13	1.74	1.32333	0.328316	0.455973	0.503034	WP_100263183.1	TlpA family protein disulfide reductase [Phocaeicola vulgatus]	0.341061	none
FHJOOPKJ_01887	227	227	155.05	117.027	0.3279	0.00885364	0.01255	WP_016270451.1	MULTISPECIES: PepSY-like domain-containing protein [Bacteroidaceae]	2.05288	none
FHJOOPKJ_00416	464.667	464	78.1767	60.1133	0.327422	0.00074803	0.00118149	WP_016270665.1	glycosyltransferase [Phocaeicola vulgatus]	3.12608	none
FHJOOPKJ_00793	17	17	4.81667	3.62333	0.326885	0.445926	0.492848	WP_005839930.1	MULTISPECIES: IS21-like element helper ATPase IstB [Bacteroidaceae]	0.350737	none
FHJOOPKJ_00411	245.333	243.333	38.0367	29.6433	0.325912	0.00966532	0.0136062	WP_117696282.1	glycosyltransferase family 2 protein [Phocaeicola vulgatus]	2.01478	none
FHJOOPKJ_03477	1975.33	1979.67	735.163	560.4	0.325753	1.88545e-06	3.55165e-06	EIY78506.1	hypothetical protein HMPREF1058_01936 [Phocaeicola vulgatus CL09T03C04]	5.72458	none
FHJOOPKJ_03128	3892.67	3893	709.933	550.217	0.325302	2.30986e-07	4.59598e-07	WP_005847331.1	MULTISPECIES: DUF4837 family protein [Bacteroidaceae]	6.63641	none
FHJOOPKJ_00137	278	277	53.2133	41.12	0.324886	0.00239434	0.00359787	WP_117720086.1	efflux RND transporter periplasmic adaptor subunit [Phocaeicola vulgatus]	2.62081	none
FHJOOPKJ_00974	11.3333	11.3333	30.61	21.9667	0.324431	0.452569	0.499879	KAB3556357.1	hypothetical protein GAX95_07095 [Phocaeicola vulgatus]	0.344315	none
FHJOOPKJ_00177	73.6667	73.6667	58.75	44.0167	0.322481	0.0667886	0.0852418	WP_011964684.1	MULTISPECIES: DUF3244 domain-containing protein [Bacteroidaceae]	1.1753	none
FHJOOPKJ_02584	31.6667	32.3333	37.79	27.5	0.321807	0.333516	0.379319	WP_080705368.1	DNA damage-inducible protein D [Phocaeicola vulgatus]	0.476884	none
FHJOOPKJ_01840	238	238.333	40.25	31.1033	0.321341	0.00636172	0.00917409	KDS61831.1	transposase, Mutator family protein [Bacteroides uniformis str. 3978 T3 ii]	2.19643	none
FHJOOPKJ_03304	399.333	399.667	83.8767	64.7833	0.321242	0.00219594	0.00331193	WP_117677951.1	glycosyltransferase family 2 protein [Phocaeicola vulgatus]	2.65838	none
FHJOOPKJ_03175	292.333	292	45.1533	35.01	0.321078	0.00449433	0.00656561	WP_005839086.1	MULTISPECIES: hypothetical protein [Bacteroidaceae]	2.34734	none	PUL43	Unk
FHJOOPKJ_03860	284.667	284	83.0133	64.17	0.320999	0.00478302	0.00695144	WP_202770378.1	adenosylcobinamide-GDP ribazoletransferase [Phocaeicola vulgatus]	2.3203	none
FHJOOPKJ_01535	1342	1348.67	326.17	251.743	0.318364	3.56603e-06	6.62907e-06	WP_005841482.1	MULTISPECIES: copper homeostasis protein CutC [Bacteroidaceae]	5.44781	none
FHJOOPKJ_03566	98	98	13.05	10.1567	0.317627	0.0494216	0.0643495	WP_215681910.1	sigma 54-interacting transcriptional regulator [Phocaeicola vulgatus]	1.30608	none
FHJOOPKJ_03326	13.3333	13.3333	0.73	0.573333	0.317545	0.491059	0.537548	WP_005847862.1	TonB-dependent receptor [Phocaeicola vulgatus]	0.308866	none	PUL47	susC
FHJOOPKJ_02937	1020	1026.67	189.64	147.133	0.316801	1.1619e-05	2.07695e-05	EFV65874.1	L-asparaginase II [Bacteroides sp. 3_1_40A]	4.93483	none
FHJOOPKJ_02893	446.667	449	64.19	49.8733	0.316656	0.000689428	0.0010941	WP_117700216.1	deoxyguanosinetriphosphate triphosphohydrolase [Phocaeicola vulgatus]	3.16151	none
FHJOOPKJ_01047	92.3333	92.6667	52.4067	39.9833	0.316588	0.0655749	0.0838091	WP_005846092.1	MULTISPECIES: copper resistance protein NlpE N-terminal domain-containing protein [Bacteroidaceae]	1.18326	none
FHJOOPKJ_01046	193.667	195	71.4633	54.89	0.315227	0.00736911	0.0105556	WP_195493992.1	DUF4136 domain-containing protein [Phocaeicola vulgatus]	2.13258	none
FHJOOPKJ_02184	46	46.6667	17.98	13.74	0.313743	0.226802	0.267463	WP_005844090.1	MULTISPECIES: master DNA invertase Mpi family serine-type recombinase [Bacteroidaceae]	0.644354	none
FHJOOPKJ_03373	9485.67	9556	1092.49	853.593	0.31372	5.04281e-08	1.03995e-07	WP_005847426.1	MULTISPECIES: acyl-CoA carboxylase subunit beta [Bacteroidaceae]	7.29733	none
FHJOOPKJ_00428	16.6667	16.6667	6.58333	5.13	0.313386	0.453829	0.50112	EFG17634.1	bacterial transferase hexapeptide repeat protein [Phocaeicola vulgatus PC510]	0.343108	none
FHJOOPKJ_02899	14198.7	14221.7	13101	9964.08	0.313369	1.45974e-05	2.60177e-05	WP_005845358.1	MULTISPECIES: RNA-binding protein [Bacteroidaceae]	4.83573	none
FHJOOPKJ_00083	1388	1406	161	125.5	0.312383	0.000736194	0.00116379	WP_057099410.1	ATP-binding protein [Phocaeicola vulgatus]	3.13301	none
FHJOOPKJ_01032	95	95.3333	10.9067	8.58	0.312154	0.0741591	0.094191	WP_057098889.1	carboxypeptidase-like regulatory domain-containing protein [Phocaeicola vulgatus]	1.12984	none
FHJOOPKJ_01648	665.667	673	252.043	191.247	0.312043	0.00249421	0.00373572	WP_117699622.1	porin family protein [Phocaeicola vulgatus]	2.60307	none
FHJOOPKJ_03013	142.333	144	21.7467	16.92	0.311128	0.0227481	0.030831	WP_117699853.1	glycoside hydrolase family 88 protein [Phocaeicola vulgatus]	1.64306	none
FHJOOPKJ_00417	644.667	650	106.127	82.9733	0.310486	0.00054202	0.00087031	WP_005843126.1	MULTISPECIES: glycosyltransferase family 4 protein [Bacteroidaceae]	3.26598	none
FHJOOPKJ_00062	747.333	748.333	3123.97	2382.83	0.309655	0.0226057	0.030672	WP_005841910.1	MULTISPECIES: 4Fe-4S binding protein [Bacteroidaceae]	1.64578	none
FHJOOPKJ_02589	91.6667	93	51.6633	39.15	0.30941	0.0620557	0.0796158	ALK83588.1	transcriptional regulator, AraC family [Phocaeicola vulgatus]	1.20722	none
FHJOOPKJ_02149	296.667	299.667	240.423	181.133	0.308511	0.0236616	0.0319515	WP_005844027.1	MULTISPECIES: FKBP-type peptidyl-prolyl cis-trans isomerase [Bacteroidaceae]	1.62596	none
FHJOOPKJ_03881	1520	1536.33	258.887	202.407	0.307788	2.90958e-05	5.11646e-05	WP_117875591.1	DNA polymerase III subunit beta [Phocaeicola vulgatus]	4.53617	none
FHJOOPKJ_03281	4956.67	4997.33	387.88	304.443	0.307349	0.000101203	0.000172359	WP_117699990.1	S9 family peptidase [Phocaeicola vulgatus]	3.99481	none
FHJOOPKJ_00015	234	236	53.1533	41.54	0.306536	0.0183554	0.0251745	WP_005843035.1	MULTISPECIES: tRNA (adenosine(37)-N6)-dimethylallyltransferase MiaA [Bacteroidaceae]	1.73624	none	PUL1	Unk
FHJOOPKJ_01373	19.3333	19.6667	29.4033	21.46	0.306406	0.35492	0.401058	EFV68646.1	transcriptional regulator [Bacteroides sp. 3_1_40A]	0.449869	none
FHJOOPKJ_03280	4124	4175	614.103	478.213	0.306012	8.18631e-06	1.48062e-05	WP_005850053.1	MULTISPECIES: phosphoribosylamine--glycine ligase [Bacteroidaceae]	5.08691	none
FHJOOPKJ_00832	142.333	144	17.9933	14.1167	0.305034	0.0637573	0.0816565	WP_117699466.1	sulfatase-like hydrolase/transferase [Phocaeicola vulgatus]	1.19547	none	PUL13	Unk
FHJOOPKJ_01811	1074	1091.67	497.72	382.647	0.304903	0.000156407	0.000263328	WP_005841081.1	MULTISPECIES: cupin domain-containing protein [Bacteroidaceae]	3.80574	none
FHJOOPKJ_01969	898	912.333	322.837	250.083	0.304693	6.16548e-05	0.000106584	WP_022508720.1	DUF3256 family protein [Phocaeicola vulgatus]	4.21003	none
FHJOOPKJ_01774	311.333	316.333	77.5833	60.0467	0.304552	0.00976397	0.0137398	WP_005840982.1	MULTISPECIES: endonuclease/exonuclease/phosphatase family protein [Bacteroidaceae]	2.01037	none	PUL26	Unk
FHJOOPKJ_03487	438.333	444.333	75.28	58.9467	0.304509	0.00156581	0.00239595	WP_008781382.1	MULTISPECIES: glycosyltransferase family 4 protein [Bacteroidaceae]	2.80526	none
FHJOOPKJ_04119	163.667	166	61.11	47.8167	0.304301	0.0198573	0.0270929	WP_005843109.1	MULTISPECIES: hypothetical protein [Bacteroidaceae]	1.70208	none
FHJOOPKJ_00586	8015	8173.33	1960.94	1531.87	0.303547	1.09439e-05	1.96105e-05	WP_005842660.1	MULTISPECIES: hypothetical protein [Bacteroidaceae]	4.96083	none
FHJOOPKJ_01590	6479	6598.33	1179.35	931.117	0.303335	3.83021e-06	7.10221e-06	WP_011965429.1	MULTISPECIES: hypothetical protein [Bacteroidaceae]	5.41678	none
FHJOOPKJ_01888	367.667	373.667	53.3867	42.0133	0.302866	0.00123672	0.00191793	WP_117700070.1	HAMP domain-containing histidine kinase [Phocaeicola vulgatus]	2.90773	none
FHJOOPKJ_03720	299.333	304.667	88.3867	68.6267	0.302056	0.00850035	0.0120959	WP_008667196.1	MULTISPECIES: iron-containing alcohol dehydrogenase [Bacteroidaceae]	2.07056	none
FHJOOPKJ_02771	2121.67	2170.33	386.417	306.793	0.300968	0.00429428	0.00628836	WP_110506344.1	MULTISPECIES: type I restriction enzyme HsdR N-terminal domain-containing protein [Bacteroidaceae]	2.36711	none
FHJOOPKJ_02407	1639	1666.33	355.793	277.503	0.300064	6.0893e-06	1.11063e-05	WP_011965641.1	MULTISPECIES: TPM domain-containing protein [Bacteroidaceae]	5.21543	none
FHJOOPKJ_01201	76.6667	78	18.1033	14.16	0.299056	0.139348	0.170227	WP_195508332.1	choloylglycine hydrolase family protein [Phocaeicola vulgatus]	0.855898	none
FHJOOPKJ_04094	450.333	461.333	170.683	132.453	0.296428	0.0100325	0.0140853	WP_005846883.1	MULTISPECIES: 16S rRNA (guanine(527)-N(7))-methyltransferase RsmG [Bacteroidaceae]	1.99859	none
FHJOOPKJ_00149	1230.67	1249.33	335.343	264.14	0.29602	0.00119157	0.00185025	WP_165854378.1	MULTISPECIES: PorT family protein [Bacteroidaceae]	2.92388	none
FHJOOPKJ_01113	235.333	240.333	40.02	31.51	0.294741	0.0091045	0.0128709	WP_117699416.1	DUF4421 domain-containing protein [Phocaeicola vulgatus]	2.04074	none
FHJOOPKJ_01813	319.333	327	196.787	152.47	0.29172	0.00983746	0.0138221	WP_005850774.1	MULTISPECIES: hypothetical protein [Bacteroidaceae]	2.00712	none
FHJOOPKJ_02284	5332.33	5465	351.67	279.08	0.291715	1.06009e-05	1.90143e-05	WP_005839496.1	MULTISPECIES: adenosylcobalamin-dependent ribonucleoside-diphosphate reductase [Bacteroidaceae]	4.97466	none
FHJOOPKJ_01985	130	132.333	82.81	64.5633	0.290608	0.0933238	0.116957	WP_005838696.1	MULTISPECIES: anaerobic ribonucleoside-triphosphate reductase activating protein [Bacteroidaceae]	1.03001	none
FHJOOPKJ_02703	1941.33	1984.33	767.153	595.29	0.285314	0.00164425	0.00250868	EOS04267.1	hypothetical protein C800_01608 [Phocaeicola vulgatus dnLKV7]	2.78403	none
FHJOOPKJ_01493	63.6667	65.3333	10.7067	8.53333	0.284683	0.114957	0.142322	WP_016270642.1	MULTISPECIES: dTDP-4-amino-4,6-dideoxygalactose transaminase [Bacteroidaceae]	0.939465	none
FHJOOPKJ_00759	483.667	498.667	35.43	28.1233	0.284441	0.00204648	0.00309794	WP_057280403.1	FtsX-like permease family protein [Phocaeicola vulgatus]	2.68899	none
FHJOOPKJ_00786	1191.67	1220	69.1667	55.2567	0.282602	0.000422379	0.000685084	WP_016271177.1	PD-(D/E)XK nuclease family protein [Phocaeicola vulgatus]	3.3743	none
FHJOOPKJ_00463	38.3333	39.3333	10.6533	8.43333	0.282049	0.248691	0.289607	WP_118433841.1	LytTR family DNA-binding domain-containing protein [Phocaeicola vulgatus]	0.604339	none
FHJOOPKJ_00511	1889	1948.33	376.41	298.693	0.279672	1.69487e-05	3.01501e-05	KAA5293034.1	flotillin-like protein FloA [Phocaeicola dorei]	4.77086	none
FHJOOPKJ_03494	219.667	227	27.88	22.21	0.277667	0.0193832	0.0264854	WP_008781389.1	MULTISPECIES: lipopolysaccharide biosynthesis protein [Bacteroidaceae]	1.71257	none
FHJOOPKJ_00176	249.333	257.667	24.66	19.88	0.277448	0.0227854	0.0308703	WP_005853058.1	MULTISPECIES: hypothetical protein [Bacteroidaceae]	1.64234	none
FHJOOPKJ_00718	2901.33	2999.33	1986.64	1558.19	0.276509	1.99897e-05	3.53375e-05	WP_005842047.1	MULTISPECIES: YhcH/YjgK/YiaL family protein [Bacteroidaceae]	4.69919	none
FHJOOPKJ_03213	23.3333	24	10.3933	8.22333	0.276053	0.368707	0.41536	WP_005852410.1	MULTISPECIES: DUF308 domain-containing protein [Bacteroidaceae]	0.433319	none
FHJOOPKJ_02887	145	149.667	132.613	103.307	0.274732	0.0451835	0.0590824	WP_005845324.1	MULTISPECIES: hypothetical protein [Bacteroidaceae]	1.34502	none
FHJOOPKJ_01754	38.3333	39.6667	144.9	109.44	0.274669	0.232663	0.273411	WP_005816310.1	MULTISPECIES: transcriptional regulator [Bacteria]	0.633272	none
FHJOOPKJ_00693	24435.3	25426.3	3915.29	3170.22	0.274579	0.000565306	0.000905722	WP_005852494.1	MULTISPECIES: hypothetical protein [Bacteroidaceae]	3.24772	none
FHJOOPKJ_02374	66.6667	69.6667	59.8	46.0667	0.274511	0.2291	0.269827	WP_016270181.1	MULTISPECIES: hypothetical protein [Phocaeicola]	0.639975	none
FHJOOPKJ_02951	102.333	106.333	30.9233	24.5633	0.274372	0.122352	0.150616	WP_005843414.1	MULTISPECIES: LytTR family DNA-binding domain-containing protein [Bacteroidaceae]	0.912388	none
FHJOOPKJ_01297	263.333	273.667	216.743	167.573	0.274294	0.0291635	0.0390511	WP_005845993.1	MULTISPECIES: rhodanese-like domain-containing protein [Bacteroidaceae]	1.53516	none
FHJOOPKJ_04111	5537.33	5729.67	924.68	744.29	0.273693	6.40577e-06	1.16546e-05	WP_057280077.1	MULTISPECIES: AhpC/TSA family protein [Bacteroidaceae]	5.19343	none
FHJOOPKJ_00308	552	573.333	443.143	346.95	0.272702	0.0647183	0.0827719	WP_005851356.1	MULTISPECIES: DUF4891 domain-containing protein [Bacteroidaceae]	1.18897	none
FHJOOPKJ_00439	20.3333	21	4.06667	3.27333	0.272084	0.396501	0.443815	WP_005839262.1	MULTISPECIES: biotin/lipoyl-binding protein [Bacteroidaceae]	0.401756	none
FHJOOPKJ_02684	1949	2018	291.883	236.763	0.271094	0.00234689	0.00352945	WP_005850660.1	MULTISPECIES: O-acetylhomoserine aminocarboxypropyltransferase/cysteine synthase [Bacteroidaceae]	2.62951	none
FHJOOPKJ_03618	17	17.6667	10.7867	8.51667	0.270145	0.465385	0.511729	WP_117889437.1	recombination protein NinG [Phocaeicola vulgatus]	0.332187	none
FHJOOPKJ_00403	638	664.333	173.397	138.017	0.269358	0.00163989	0.00250307	ALK86073.1	putative NTE family protein ylbK [Phocaeicola vulgatus]	2.78518	none
FHJOOPKJ_00880	1701	1764	263.443	212.08	0.268634	0.000112127	0.000190347	WP_117699495.1	beta-ketoacyl-[acyl-carrier-protein] synthase family protein [Phocaeicola vulgatus]	3.95029	none
FHJOOPKJ_00729	546.333	572	137.91	110.437	0.268017	0.0108213	0.0151523	WP_016271221.1	hypothetical protein [Phocaeicola vulgatus]	1.96572	none
FHJOOPKJ_02582	324.333	336.667	49.97	40.3567	0.266736	0.0181225	0.0248736	WP_117699565.1	spore maturation protein [Phocaeicola vulgatus]	1.74178	none
FHJOOPKJ_04237	88.3333	91.6667	10.5467	8.53	0.265885	0.153806	0.18671	ALK83861.1	Transposase [Phocaeicola vulgatus]	0.813028	none
FHJOOPKJ_04173	376.333	394	73.4633	58.9467	0.265305	0.00979031	0.0137663	WP_087407185.1	replication initiation protein [Bacteroides sp. An279]	2.0092	none
FHJOOPKJ_03432	735.667	767	91.45	73.7433	0.264382	0.00566027	0.00818757	WP_012055923.1	MULTISPECIES: DUF3943 domain-containing protein [Phocaeicola]	2.24716	none
FHJOOPKJ_00957	348	364.667	214.927	172.143	0.262393	0.0234034	0.031646	WP_005845831.1	MULTISPECIES: nucleoside deaminase [Bacteroidaceae]	1.63072	none
FHJOOPKJ_03303	1337.67	1396	139.317	113.257	0.262272	9.81962e-05	0.000167627	WP_117699998.1	glycosyltransferase family 39 protein [Phocaeicola vulgatus]	4.00791	none
FHJOOPKJ_02881	1171.67	1227.33	201.43	163.777	0.261023	0.000998623	0.00155789	WP_005845311.1	MULTISPECIES: undecaprenyldiphospho-muramoylpentapeptide beta-N-acetylglucosaminyltransferase [Bacteroidaceae]	3.0006	none
FHJOOPKJ_01298	570.667	595.667	205.743	163.6	0.260915	0.00195233	0.00296397	ALK86839.1	hypothetical protein BvMPK_4297 [Phocaeicola vulgatus]	2.70945	none
FHJOOPKJ_02017	339	354.667	77.64	62.3733	0.259557	0.00636223	0.00917409	WP_117678406.1	hypothetical protein [Phocaeicola vulgatus]	2.19639	none
FHJOOPKJ_01666	380	398	104.11	84.0533	0.257302	0.0190545	0.0260652	WP_005849784.1	MULTISPECIES: 4Fe-4S binding protein [Bacteroidaceae]	1.72	none
FHJOOPKJ_01064	14.6667	15.3333	1.81333	1.49667	0.257276	0.52411	0.569489	WP_074783201.1	polysaccharide biosynthesis protein [Phocaeicola vulgatus]	0.280578	none
FHJOOPKJ_03100	1563.33	1633	208.177	168.58	0.255913	0.00225065	0.00339166	WP_005849505.1	sodium-dependent transporter [Phocaeicola vulgatus]	2.64769	none
FHJOOPKJ_01567	567.667	596.667	646.92	505.03	0.255811	0.00472517	0.00687653	ALK83929.1	hypothetical protein BvMPK_1320 [Phocaeicola vulgatus]	2.32558	none
FHJOOPKJ_00844	1327.33	1397.67	575.563	455.61	0.255354	0.000744417	0.00117629	WP_005844307.1	MULTISPECIES: hypothetical protein [Bacteroidaceae]	3.12818	none
FHJOOPKJ_03694	242.333	255	91.8167	73.7867	0.254606	0.0516852	0.0670832	WP_005938547.1	MULTISPECIES: chloramphenicol acetyltransferase [Bacteroidaceae]	1.28663	none
FHJOOPKJ_02054	518.333	544.667	81.1933	65.6467	0.254056	0.0045072	0.0065785	ALK86717.1	major outer membrane protein OmpA [Phocaeicola vulgatus]	2.34609	none
FHJOOPKJ_00626	449	473.667	58.9067	47.7467	0.253964	0.0130905	0.0181911	EFV66021.1	phosphotransferase enzyme II [Bacteroides sp. 3_1_40A]	1.88304	none
FHJOOPKJ_02088	151.333	156.667	22.2667	17.8933	0.25383	0.366433	0.413178	WP_154577271.1	Na+/H+ antiporter NhaC family protein [Phocaeicola vulgatus]	0.436005	none
FHJOOPKJ_01192	59	62	11.43	9.18667	0.253266	0.17104	0.205864	WP_005843796.1	MULTISPECIES: inorganic phosphate transporter [Bacteroidaceae]	0.766901	none
FHJOOPKJ_01107	815.333	857.667	183.66	148.21	0.252316	0.00801214	0.0114322	WP_065762693.1	MULTISPECIES: IS982 family transposase [Bacteria]	2.09625	none
FHJOOPKJ_03787	542	568.667	22.13	18.23	0.251633	0.00719723	0.0103357	WP_005851075.1	MULTISPECIES: response regulator [Bacteroidaceae]	2.14283	none
FHJOOPKJ_00272	1792	1886.33	448.583	364.513	0.248508	0.0005385	0.000865035	WP_110506441.1	peptidylprolyl isomerase [Bacteroides sp. NMBE5]	3.26881	none
FHJOOPKJ_00956	9824.33	10371.7	1221.89	996.507	0.248477	5.17914e-05	8.99561e-05	WP_005845829.1	MULTISPECIES: aminoacyl-histidine dipeptidase [Bacteroidaceae]	4.28574	none
FHJOOPKJ_04093	415	438.667	153.77	123.68	0.247439	0.020977	0.0285253	WP_005846881.1	MULTISPECIES: MBL fold metallo-hydrolase [Bacteroidaceae]	1.67826	none
FHJOOPKJ_04204	620.333	654.667	122.627	99.4133	0.24627	0.00328369	0.00486663	WP_118328066.1	AhpC/TSA family protein [Phocaeicola vulgatus]	2.48364	none
FHJOOPKJ_02939	504	530.333	81.3267	66.29	0.246255	0.0163155	0.0224942	WP_016270376.1	dicarboxylate/amino acid:cation symporter [Phocaeicola vulgatus]	1.7874	none
FHJOOPKJ_01558	912.667	961	37.46	30.8133	0.245213	0.00207115	0.003134	WP_118327659.1	helix-turn-helix domain-containing protein [Phocaeicola vulgatus]	2.68379	none
FHJOOPKJ_03489	428.667	455.333	115.49	94.0267	0.244827	0.0234096	0.031646	WP_016271728.1	LicD family protein [Phocaeicola vulgatus]	1.63061	none
FHJOOPKJ_01906	462.333	486.667	371.933	295.203	0.24416	0.0155534	0.0214999	WP_005846767.1	MULTISPECIES: HEPN domain-containing protein [Bacteroidaceae]	1.80818	none
FHJOOPKJ_01943	30.6667	32.3333	2.42	1.98333	0.243774	0.442104	0.490086	WP_032945015.1	MULTISPECIES: alpha-xylosidase [Bacteroidaceae]	0.354475	none
FHJOOPKJ_03960	977	1031.67	99.1367	81.31	0.242346	0.00187806	0.00285356	WP_005838778.1	MULTISPECIES: gamma-glutamyl-gamma-aminobutyrate hydrolase family protein [Bacteroidaceae]	2.72629	none
FHJOOPKJ_00847	340.333	360	41.6733	34.1567	0.24172	0.0263698	0.0354782	WP_008781351.1	MULTISPECIES: NAD(P)-binding protein [Bacteroidaceae]	1.57889	none
FHJOOPKJ_00870	398.667	423	98.8833	81.2667	0.241402	0.0585435	0.075399	ALK83352.1	hypothetical protein BvMPK_0734 [Phocaeicola vulgatus]	1.23252	none
FHJOOPKJ_01932	830.333	886	101.577	83.4667	0.241103	0.0177995	0.024476	WP_016276119.1	MULTISPECIES: hypothetical protein [Phocaeicola]	1.74959	none
FHJOOPKJ_00314	38.6667	41	6.12	5.01	0.237722	0.289887	0.333306	WP_016270701.1	MULTISPECIES: BamA/TamA family outer membrane protein [Bacteroidaceae]	0.537772	none
FHJOOPKJ_02876	1227	1302.33	807.49	659.767	0.237699	0.00744959	0.0106626	WP_117700214.1	GatB/YqeY domain-containing protein [Phocaeicola vulgatus]	2.12787	none
FHJOOPKJ_01118	3360.67	3570.67	974.45	794.223	0.237625	0.00077963	0.00122718	WP_005846171.1	MULTISPECIES: thiamine pyrophosphate-dependent enzyme [Bacteroidaceae]	3.10811	none
FHJOOPKJ_02142	4927.33	5214	914.213	752.727	0.237033	0.000415139	0.000673936	WP_005844013.1	MULTISPECIES: tRNA preQ1(34) S-adenosylmethionine ribosyltransferase-isomerase QueA [Bacteroidaceae]	3.38181	none
FHJOOPKJ_02342	2512	2674	989.227	810.92	0.236996	0.00159071	0.00243001	WP_004315354.1	MULTISPECIES: Type 1 glutamine amidotransferase-like domain-containing protein [Bacteroidales]	2.79841	none
FHJOOPKJ_01696	884.333	944.667	218.527	178.87	0.232594	0.0338668	0.0449075	WP_117700211.1	deoxyribonuclease IV [Phocaeicola vulgatus]	1.47023	none
FHJOOPKJ_04212	284.667	302.333	49.1633	40.56	0.230446	0.0521513	0.0676165	EAH5838777.1	mobilization protein [Campylobacter jejuni]	1.28273	none
FHJOOPKJ_00282	234	250	70.0433	57.4467	0.229881	0.0473907	0.0618147	WP_032952350.1	HAD-IA family hydrolase [Phocaeicola vulgatus]	1.32431	none
FHJOOPKJ_00805	717	768.333	147.42	122.153	0.229551	0.029483	0.0394358	WP_229533050.1	glycosyltransferase [Phocaeicola vulgatus]	1.53043	none	PUL12	GT2_Glycos_transf_2
FHJOOPKJ_02955	1873.33	2001.67	553.63	453.99	0.228855	0.00124765	0.00193243	ALK85106.1	Lactate utilization protein A [Phocaeicola vulgatus]	2.90391	none
FHJOOPKJ_03456	493	527.333	735.47	584.01	0.228303	0.0284274	0.0381209	ALK84952.1	DNA Polymerase Beta Domain Protein Region [Phocaeicola vulgatus]	1.54626	none
FHJOOPKJ_01413	10	10.6667	5.94333	4.94	0.226787	0.650865	0.68989	RGN49046.1	hypothetical protein DXB61_14275 [Parabacteroides merdae]	0.186509	none
FHJOOPKJ_00324	10258.7	11012.3	2563.02	2133.85	0.226695	0.00083547	0.00131115	WP_005847100.1	MULTISPECIES: DUF3869 domain-containing protein [Phocaeicola]	3.07807	none
FHJOOPKJ_03748	502.333	537	21.1	17.6733	0.226235	0.0173111	0.02384	WP_005822169.1	response regulator [Bacteroides fragilis]	1.76168	none
FHJOOPKJ_03763	3825.33	4089.67	1543.99	1264.08	0.226129	0.000514414	0.000827066	WP_011965198.1	MULTISPECIES: porin family protein [Bacteroidaceae]	3.28869	none
FHJOOPKJ_00218	53.3333	57.3333	9.04	7.42	0.223945	0.247507	0.28864	WP_005852982.1	MULTISPECIES: efflux RND transporter periplasmic adaptor subunit [Bacteroidaceae]	0.606413	none
FHJOOPKJ_03261	13.3333	14.3333	10.28	8.18	0.222317	0.572026	0.615552	WP_075964290.1	Rrf2 family transcriptional regulator [Parabacteroides massiliensis]	0.242584	none
FHJOOPKJ_00743	1326	1428	234.483	194.117	0.221836	0.00254009	0.0038029	WP_005852565.1	UDP-N-acetyl glucosamine 2-epimerase [Phocaeicola vulgatus]	2.59515	none
FHJOOPKJ_02136	2607.33	2789	174.183	145.373	0.221551	0.000760398	0.00119794	WP_115648729.1	ribonucleoside-diphosphate reductase subunit alpha [Phocaeicola vulgatus]	3.11896	none
FHJOOPKJ_02016	81.3333	87.3333	78.5033	63.22	0.220517	0.241252	0.28242	WP_005853646.1	MULTISPECIES: GntR family transcriptional regulator [Bacteroidaceae]	0.61753	none
FHJOOPKJ_00213	370.667	400	42.8933	35.8133	0.219519	0.08095	0.102251	EFG16775.1	conserved hypothetical protein [Phocaeicola vulgatus PC510]	1.09178	none	PUL6	Unk
FHJOOPKJ_02912	13065.3	14063.7	3106.75	2567.12	0.218764	0.000229673	0.000381267	WP_057279971.1	FKBP-type peptidyl-prolyl cis-trans isomerase [Phocaeicola vulgatus]	3.63889	none
FHJOOPKJ_00787	2212.67	2387.67	559.15	462.34	0.216893	0.00180939	0.00275263	WP_012055731.1	4-(cytidine 5'-diphospho)-2-C-methyl-D-erythritol kinase [Phocaeicola vulgatus]	2.74247	none
FHJOOPKJ_01299	2131.33	2293.67	350.203	291.7	0.216726	0.00278491	0.00415083	WP_005845989.1	MULTISPECIES: 1-acyl-sn-glycerol-3-phosphate acyltransferase [Bacteroidaceae]	2.55519	none
FHJOOPKJ_00440	25.6667	27.6667	3.24	2.68667	0.215431	0.472246	0.518962	WP_008669562.1	MULTISPECIES: TolC family protein [Bacteroidaceae]	0.325832	none
FHJOOPKJ_01491	21.3333	23	5.42667	4.36333	0.215114	0.515844	0.560839	WP_016270644.1	MULTISPECIES: DUF4422 domain-containing protein [Bacteroidaceae]	0.287482	none
FHJOOPKJ_00469	140.333	152	107.007	86.5433	0.214614	0.123725	0.152102	WP_005839323.1	MULTISPECIES: secondary thiamine-phosphate synthase enzyme YjbQ [Bacteroidaceae]	0.907541	none
FHJOOPKJ_03135	1530	1646	238.397	199.153	0.213266	0.0087329	0.0123993	WP_005847347.1	MULTISPECIES: sugar MFS transporter [Bacteroidaceae]	2.05884	none
FHJOOPKJ_00936	398	426	51.1567	42.9633	0.212872	0.0896784	0.112542	WP_005849066.1	MULTISPECIES: AAA family ATPase [Bacteroidaceae]	1.04731	none
FHJOOPKJ_03493	101.667	110.333	19.5133	16.1567	0.212429	0.184479	0.220666	WP_016271727.1	acyltransferase [Phocaeicola vulgatus]	0.734054	none
FHJOOPKJ_00932	403	435.667	50.4933	42.1567	0.212048	0.0756877	0.0959999	WP_005849070.1	MULTISPECIES: cardiolipin synthase [Bacteroidaceae]	1.12097	none
FHJOOPKJ_03988	26	28.3333	11.0033	9.02667	0.211963	0.462729	0.509112	WP_005835699.1	MULTISPECIES: Crp/Fnr family transcriptional regulator [Bacteroidales]	0.334674	none
FHJOOPKJ_01885	59.6667	64.3333	10.0533	8.44	0.211789	0.262936	0.304701	WP_118420374.1	glycosyltransferase [Phocaeicola vulgatus]	0.58015	none
FHJOOPKJ_00514	1375.33	1490.33	165.393	138.987	0.210253	0.0151373	0.0209404	A6L6E8.1	RecName: Full=tRNA modification GTPase MnmE [Phocaeicola vulgatus ATCC 8482]	1.81995	none
FHJOOPKJ_01832	16.3333	17.6667	2.29	1.92667	0.209931	0.598959	0.641343	WP_229035875.1	hypothetical protein [Phocaeicola vulgatus]	0.222603	none	PUL29	GH3
FHJOOPKJ_01679	1655	1790.33	266.21	222.897	0.208612	0.00312992	0.00464998	WP_117699819.1	mannonate dehydratase [Phocaeicola vulgatus]	2.50447	none
FHJOOPKJ_02405	1252.67	1366.33	370.343	307.78	0.2062	0.00899707	0.0127386	WP_005847207.1	MULTISPECIES: shikimate dehydrogenase [Bacteroidaceae]	2.0459	none
FHJOOPKJ_03968	35.6667	38.6667	34.0033	27.8933	0.205945	0.442461	0.490334	WP_005841677.1	MULTISPECIES: fluoride efflux transporter CrcB [Bacteroidaceae]	0.354125	none
FHJOOPKJ_00879	256	278.333	507.117	404.593	0.205794	0.0627581	0.0804328	WP_005844349.1	MULTISPECIES: acyl carrier protein [Bacteroidaceae]	1.20233	none
FHJOOPKJ_02367	248.333	269.667	19.8667	16.8233	0.20497	0.0836889	0.105493	WP_005816140.1	MULTISPECIES: type IV secretory system conjugative DNA transfer family protein [Bacteroidales]	1.07733	none
FHJOOPKJ_01470	1373.67	1496.33	178.503	150.21	0.203497	0.00436887	0.00639504	ABR41551.1	glycosyltransferase [Phocaeicola vulgatus ATCC 8482]	2.35963	none
FHJOOPKJ_03177	3007.33	3274.33	209.43	177	0.203119	0.000961567	0.00150263	WP_022508585.1	family 20 glycosylhydrolase [Phocaeicola vulgatus]	3.01702	none	PUL43	GH20
FHJOOPKJ_00496	218.667	238.333	80.4667	66.8433	0.201699	0.0851691	0.107249	WP_005839379.1	MULTISPECIES: thiamine diphosphokinase [Bacteroidaceae]	1.06972	none
FHJOOPKJ_03796	322.667	350	169.85	142.04	0.199734	0.100289	0.125302	WP_005849897.1	MULTISPECIES: flavin reductase [Bacteroidaceae]	0.998746	none
FHJOOPKJ_01448	3466.67	3775.33	4469.94	3618.83	0.199579	0.00104214	0.00162509	WP_005841619.1	MULTISPECIES: preprotein translocase subunit YajC [Bacteroidaceae]	2.98207	none
FHJOOPKJ_02577	229.333	249.333	117.337	97.3467	0.199386	0.105023	0.130728	WP_117696898.1	adenine phosphoribosyltransferase [Phocaeicola vulgatus]	0.978716	none
FHJOOPKJ_02404	1489	1630.67	450.087	374.153	0.198258	0.00808777	0.0115356	WP_005847210.1	MULTISPECIES: bifunctional demethylmenaquinone methyltransferase/2-methoxy-6-polyprenyl-1,4-benzoquinol methylase UbiE [Bacteroidaceae]	2.09217	none
FHJOOPKJ_02880	1585.67	1731.67	214.847	180.503	0.197767	0.0160166	0.022095	WP_117700215.1	UDP-N-acetylmuramate--L-alanine ligase [Phocaeicola vulgatus]	1.79543	none
FHJOOPKJ_02160	87	95	37.2933	31.28	0.196714	0.246254	0.287544	WP_117699920.1	RNA polymerase sigma-70 factor [Phocaeicola vulgatus]	0.608616	none	PUL32	Unk
FHJOOPKJ_01117	2979	3255	1429.02	1188.13	0.196544	0.00316349	0.00469796	WP_005846169.1	MULTISPECIES: 2-oxoacid:acceptor oxidoreductase family protein [Bacteroidaceae]	2.49983	none
FHJOOPKJ_00739	261.333	285	61.0767	51.51	0.196192	0.075333	0.095616	WP_074783374.1	DUF1460 domain-containing protein [Phocaeicola vulgatus]	1.12301	none
FHJOOPKJ_03853	36	39.3333	12.2133	10.2467	0.195885	0.418082	0.466269	ABR40775.1	integrase [Phocaeicola vulgatus ATCC 8482]	0.378739	none
FHJOOPKJ_00211	260	286	13.17	11.1767	0.193628	0.107719	0.133766	WP_110506407.1	MULTISPECIES: TonB-dependent receptor [Bacteroidaceae]	0.967709	none	PUL6	susC
FHJOOPKJ_00876	172	188.333	119.24	100.083	0.192903	0.121691	0.149852	BDC05023.1	hypothetical protein GAIMETA21S03_09060 [Phocaeicola vulgatus]	0.914741	none
FHJOOPKJ_02366	158.667	175	35.6833	29.97	0.192866	0.254493	0.295755	WP_005816138.1	MULTISPECIES: fimbrillin family protein [Bacteroidales]	0.594324	none
FHJOOPKJ_01100	176.667	193	163.84	135.783	0.192577	0.232455	0.273253	WP_005846143.1	MULTISPECIES: YccF domain-containing protein [Bacteroidaceae]	0.633661	none
FHJOOPKJ_01505	180.333	198	477.253	385.347	0.192302	0.123186	0.15154	WP_005843196.1	MULTISPECIES: hypothetical protein [Bacteroidaceae]	0.909439	none
FHJOOPKJ_02598	2733.33	2989	304.467	258.42	0.191526	0.00452466	0.00659943	WP_005843878.1	MULTISPECIES: S41 family peptidase [Bacteroidaceae]	2.34441	none
FHJOOPKJ_01119	194.667	215.667	842.717	684.647	0.190186	0.25555	0.296796	WP_005846173.1	MULTISPECIES: hypothetical protein [Bacteroidaceae]	0.592525	none
FHJOOPKJ_00574	11.6667	13	8.14667	6.73	0.190025	0.712349	0.748801	WP_172769927.1	Crp/Fnr family transcriptional regulator [Phocaeicola vulgatus]	0.147307	none
FHJOOPKJ_02772	633	695.333	1356.39	1091	0.189906	0.031699	0.0422004	WP_117852749.1	hypothetical protein [Phocaeicola vulgatus]	1.49895	none
FHJOOPKJ_04020	671.667	738.667	302.077	252.6	0.18952	0.0355389	0.0469891	WP_005845453.1	MULTISPECIES: cob(I)yrinic acid a,c-diamide adenosyltransferase [Bacteroidaceae]	1.4493	none
FHJOOPKJ_00457	6.33333	7	0.783333	0.646667	0.188475	0.780447	0.811568	CUO23173.1	outer membrane protein [Phocaeicola vulgatus]	0.107656	none
FHJOOPKJ_03262	233.333	254.333	35.1033	29.6733	0.186932	0.253071	0.294289	WP_128133927.1	DUF3575 domain-containing protein [Parabacteroides sp. AM58-2XD]	0.596757	none
FHJOOPKJ_03443	138.333	152	16.3367	13.9567	0.184129	0.178348	0.214029	WP_005841351.1	Mfa1 family fimbria major subunit [Phocaeicola vulgatus]	0.748731	none
FHJOOPKJ_02055	333.667	367.333	98.5033	82.7733	0.18327	0.119981	0.147845	MBT0709039.1	Peroxide stress resistance protein YaaA [Phocaeicola vulgatus]	0.920889	none
FHJOOPKJ_04202	17.3333	19.3333	3.43333	2.90333	0.181657	0.659734	0.698084	WP_008024683.1	MULTISPECIES: tyrosine-type recombinase/integrase [Bacteroidales]	0.180631	none
FHJOOPKJ_02365	51.3333	56.6667	18.7667	16.3467	0.180569	0.444576	0.491789	EEB23787.1	hypothetical protein BACDOR_03752 [Phocaeicola dorei DSM 17855]	0.352054	none
FHJOOPKJ_04033	5978.33	6601	1170.82	998.057	0.18045	0.00369008	0.00544261	WP_005853694.1	MULTISPECIES: aspartate-semialdehyde dehydrogenase [Bacteroidaceae]	2.43296	none
FHJOOPKJ_01637	245.667	268.333	89.3433	75.49	0.180037	0.21936	0.259352	WP_005838748.1	MULTISPECIES: DUF2975 domain-containing protein [Bacteroidaceae]	0.658843	none
FHJOOPKJ_03225	6.33333	7	1.86333	1.52	0.179951	0.772677	0.804626	WP_008654810.1	MULTISPECIES: glycosyltransferase [Bacteroidaceae]	0.112002	none
FHJOOPKJ_03490	405	449	71.39	60.7267	0.178963	0.0800574	0.101228	WP_008781385.1	MULTISPECIES: NAD/NADP-dependent octopine/nopaline dehydrogenase family protein [Bacteroidaceae]	1.0966	none
FHJOOPKJ_01984	1094.67	1206.33	82.0767	70.5333	0.178494	0.0224811	0.0305142	WP_005838694.1	MULTISPECIES: anaerobic ribonucleoside triphosphate reductase [Bacteroidaceae]	1.64818	none
FHJOOPKJ_00530	326	361	101.557	86.09	0.178473	0.0744553	0.0945346	WP_005845198.1	MULTISPECIES: RloB family protein [Bacteroidaceae]	1.1281	none
FHJOOPKJ_00472	1607.33	1790	188.953	161.333	0.177732	0.0380581	0.0502115	MBP8089753.1	DUF4836 family protein [Phocaeicola sp.]	1.41955	none
FHJOOPKJ_01812	2657	2940	285.983	245.777	0.176979	0.00631332	0.00911071	WP_005850772.1	MULTISPECIES: AMP-binding protein [Bacteroidaceae]	2.19974	none
FHJOOPKJ_04211	373.667	414.667	146.15	124.6	0.176638	0.0985642	0.123272	EIY72510.1	hypothetical protein HMPREF1073_04089 [Bacteroides uniformis CL03T12C37]	1.00628	none
FHJOOPKJ_00065	518	572.667	141.56	120.52	0.176581	0.048828	0.0636443	WP_008670304.1	MULTISPECIES: 5'-nucleotidase C-terminal domain-containing protein [Bacteroidaceae]	1.31133	none
FHJOOPKJ_02678	841.667	930	293.667	250.61	0.175214	0.0547386	0.0707465	WP_195642311.1	hypothetical protein [Phocaeicola vulgatus]	1.26171	none
FHJOOPKJ_01992	1348.33	1500.67	447.903	381.087	0.174233	0.015822	0.0218466	WP_005839224.1	MULTISPECIES: tRNA (adenosine(37)-N6)-threonylcarbamoyltransferase complex dimerization subunit type 1 TsaB [Bacteroidaceae]	1.80074	none
FHJOOPKJ_02551	118.333	130.667	57.2	48.2467	0.172996	0.318418	0.363949	WP_004295275.1	MULTISPECIES: methylglyoxal synthase [Bacteroidales]	0.497002	none
FHJOOPKJ_01273	1079.33	1193.33	101.36	87.4267	0.172071	0.0491305	0.0640158	WP_057279819.1	S8 family serine peptidase [Phocaeicola vulgatus]	1.30865	none
FHJOOPKJ_00734	190.667	213	60.8267	52.2667	0.171205	0.297516	0.341437	WP_005841995.1	MULTISPECIES: PorT family protein [Bacteroidaceae]	0.52649	none
FHJOOPKJ_04201	34.6667	38.6667	5.28333	4.55667	0.169741	0.49459	0.540769	WP_008024682.1	MULTISPECIES: tyrosine-type recombinase/integrase [Bacteroidales]	0.305755	none
FHJOOPKJ_00254	387	429.333	61.2967	52.8233	0.167476	0.136052	0.166421	WP_117696345.1	[FeFe] hydrogenase H-cluster maturation GTPase HydF [Phocaeicola vulgatus]	0.866295	none
FHJOOPKJ_03022	167.333	186.667	29.87	25.75	0.166777	0.278476	0.320487	WP_005849123.1	MULTISPECIES: efflux RND transporter periplasmic adaptor subunit [Bacteroidaceae]	0.555213	none
FHJOOPKJ_00051	39.3333	43.6667	3.79	3.32333	0.165695	0.537081	0.581522	WP_005843103.1	MULTISPECIES: RagB/SusD family nutrient uptake outer membrane protein [Bacteroidaceae]	0.26996	none	PUL2	susD
FHJOOPKJ_00948	733.667	821.333	184.713	158.713	0.165684	0.0505231	0.0657372	WP_221413022.1	phosphatidate cytidylyltransferase [Phocaeicola vulgatus]	1.29651	none
FHJOOPKJ_01946	445.667	499	65.1867	56.2	0.165035	0.159905	0.193284	EOR97697.1	phosphoribosylaminoimidazolecarboxamide formyltransferase [Phocaeicola vulgatus dnLKV7]	0.796137	none
FHJOOPKJ_00060	3691.33	4131.33	577.423	496.203	0.163018	0.00724357	0.0103879	WP_005841905.1	MULTISPECIES: bifunctional 3,4-dihydroxy-2-butanone-4-phosphate synthase/GTP cyclohydrolase II [Bacteroidaceae]	2.14005	none
FHJOOPKJ_03997	101	113	33.55	28.6233	0.162371	0.340814	0.386543	BDC10189.1	hypothetical protein GAIMETA21S07_19770 [Phocaeicola vulgatus]	0.467483	none
FHJOOPKJ_00414	293.667	327.667	80.1167	68.81	0.161808	0.127876	0.15689	WP_005843123.1	MULTISPECIES: class I SAM-dependent methyltransferase [Bacteroidaceae]	0.893211	none
FHJOOPKJ_00164	569.667	637.667	407.12	346.273	0.161797	0.0645336	0.0825643	ALK86529.1	Lipoprotein [Phocaeicola vulgatus]	1.19021	none
FHJOOPKJ_01529	802	896	60.86	53.15	0.160936	0.0443248	0.0580628	WP_117699936.1	PAS domain-containing sensor histidine kinase [Phocaeicola vulgatus]	1.35335	none
FHJOOPKJ_04196	130.333	145.667	85.2567	73.5667	0.160681	0.391445	0.438824	WP_172774705.1	BF3164 family lipoprotein [Phocaeicola vulgatus]	0.407329	none
FHJOOPKJ_04120	278.333	311.667	47.1733	41.02	0.159108	0.14005	0.171019	WP_007840914.1	MULTISPECIES: ATP-binding protein [Bacteroidaceae]	0.853718	none
FHJOOPKJ_03540	558.667	630	1022.45	840.48	0.158331	0.101339	0.126528	WP_117814904.1	DUF1653 domain-containing protein [Phocaeicola vulgatus]	0.994222	none
FHJOOPKJ_00353	13.3333	15	2.88	2.49333	0.158274	0.72093	0.756153	WP_007840161.1	MULTISPECIES: Gfo/Idh/MocA family oxidoreductase [Phocaeicola]	0.142107	none
FHJOOPKJ_04160	133.667	150.333	200.99	168.12	0.157997	0.442825	0.490442	MBS4851160.1	helix-turn-helix domain-containing protein [Bacteroides salyersiae]	0.353768	none
FHJOOPKJ_01907	505.333	566.333	670.953	561.337	0.157618	0.10573	0.13143	ALK85197.1	DNA Polymerase [Phocaeicola vulgatus]	0.9758	none
FHJOOPKJ_00040	967.667	1085.33	205.833	178.893	0.157346	0.0522351	0.0677013	WP_016270833.1	PD-(D/E)XK nuclease family transposase [Phocaeicola vulgatus]	1.28204	none	PUL2	Unk
FHJOOPKJ_03189	442	495.333	38.3833	33.3667	0.157209	0.13913	0.170017	WP_008668392.1	MULTISPECIES: glycoside hydrolase family 97 protein [Bacteroidaceae]	0.85658	none	PUL44	GH97
FHJOOPKJ_03284	35	39.6667	116.407	94.88	0.156375	0.623603	0.665212	WP_005850060.1	MULTISPECIES: hypothetical protein [Bacteroidaceae]	0.205092	none
FHJOOPKJ_02399	66	74	18.5633	16.0533	0.156118	0.493183	0.539392	WP_008669931.1	MULTISPECIES: TIGR03915 family putative DNA repair protein [Bacteroidaceae]	0.306992	none
FHJOOPKJ_03269	37.3333	41.6667	57.04	48.6267	0.155745	0.64758	0.687201	WP_128133934.1	hypothetical protein [Parabacteroides sp. AM58-2XD]	0.188707	none
FHJOOPKJ_03442	8	9	1.05667	0.92	0.154643	0.803193	0.831458	WP_117700053.1	DUF3868 domain-containing protein [Phocaeicola vulgatus]	0.0951802	none
FHJOOPKJ_01445	574.333	645	391.997	335.407	0.154368	0.112246	0.1392	KAB3719026.1	hypothetical protein GAS67_25330, partial [Phocaeicola vulgatus]	0.949829	none
FHJOOPKJ_00366	20.6667	23.3333	4.04667	3.49667	0.152063	0.669845	0.707561	WP_117700398.1	NAD-dependent epimerase/dehydratase family protein [Phocaeicola vulgatus]	0.174026	none
FHJOOPKJ_02144	2379	2676.33	626.793	543.53	0.151894	0.0423145	0.0556077	WP_005844017.1	MULTISPECIES: undecaprenyl-diphosphate phosphatase [Bacteroidaceae]	1.37351	none
FHJOOPKJ_02999	1770	1989.33	2273.68	1909.77	0.151673	0.0300572	0.0401309	WP_005839896.1	MULTISPECIES: thioredoxin [Bacteroidaceae]	1.52205	none
FHJOOPKJ_00627	437.667	494.667	90.8367	78.6867	0.1513	0.117202	0.144761	ABR39471.1	4-deoxy-L-threo-5-hexosulose-uronate ketol-isomerase [Phocaeicola vulgatus ATCC 8482]	0.931064	none
FHJOOPKJ_00275	825.333	927.333	54.86	48.1233	0.151134	0.135361	0.165687	WP_117696341.1	ATP-binding protein [Phocaeicola vulgatus]	0.868506	none
FHJOOPKJ_02823	90	101	169.64	143.067	0.150081	0.398592	0.446021	WP_005648607.1	MULTISPECIES: hypothetical protein [Bacteria]	0.399471	none
FHJOOPKJ_01786	64	72	34.9267	30.26	0.149877	0.445645	0.492823	WP_117693795.1	DUF4251 domain-containing protein [Phocaeicola vulgatus]	0.351011	none
FHJOOPKJ_04155	533.667	602.333	58.25	51	0.149337	0.0867954	0.109147	WP_016270393.1	MULTISPECIES: putative transporter [Bacteroidaceae]	1.0615	none
FHJOOPKJ_00180	938	1063.33	68.82	60.37	0.147139	0.0842211	0.106128	WP_032952668.1	TonB-dependent receptor family protein [Phocaeicola vulgatus]	1.07458	none
FHJOOPKJ_04154	196.333	220.667	53.5333	46.9633	0.146829	0.306414	0.350882	WP_005844701.1	MULTISPECIES: NAD(+) diphosphatase [Bacteroidaceae]	0.513692	none
FHJOOPKJ_00783	714	810	99.41	86.6267	0.145599	0.0861774	0.108407	WP_016271180.1	sigma-54 dependent transcriptional regulator [Phocaeicola vulgatus]	1.06461	none
FHJOOPKJ_03078	7150.67	8073.33	351.03	308.35	0.145129	0.0287382	0.0384956	WP_008666555.1	MULTISPECIES: DUF2723 domain-containing protein [Bacteroidaceae]	1.54154	none
FHJOOPKJ_03346	333.667	375	30.1467	26.64	0.144828	0.221803	0.261905	WP_117833802.1	competence protein ComEC family protein [Phocaeicola vulgatus]	0.654032	none
FHJOOPKJ_03033	127.333	144	20.1767	17.7333	0.144815	0.329395	0.374864	WP_117700330.1	DUF418 domain-containing protein [Phocaeicola vulgatus]	0.482283	none
FHJOOPKJ_02938	188.333	213.667	30.43	26.5	0.144665	0.23434	0.275294	WP_016270375.1	OprO/OprP family phosphate-selective porin [Phocaeicola vulgatus]	0.630153	none
FHJOOPKJ_00157	568.667	643.667	56.29	49.69	0.143974	0.151877	0.184734	WP_032939075.1	MULTISPECIES: hypothetical protein [Phocaeicola]	0.818508	none
FHJOOPKJ_03223	15.6667	17.6667	3.35667	2.71333	0.143721	0.797344	0.826335	WP_008654814.1	MULTISPECIES: glycosyltransferase [Bacteroidaceae]	0.0983541	none
FHJOOPKJ_01300	1646.67	1867.33	341.107	297.533	0.143304	0.0937703	0.117476	WP_005845987.1	MULTISPECIES: D-alanine--D-alanine ligase [Bacteroidaceae]	1.02793	none
FHJOOPKJ_03176	166.667	188	42.3267	37.1367	0.143213	0.334797	0.380548	WP_118171312.1	carboxymuconolactone decarboxylase family protein [Phocaeicola vulgatus]	0.475219	none	PUL43	Unk
FHJOOPKJ_00522	77.6667	88	92.1633	78.5667	0.142491	0.408112	0.455979	EFG19380.1	conserved domain protein [Phocaeicola vulgatus PC510]	0.389221	none
FHJOOPKJ_02311	8105	9203.33	1274.7	1116.19	0.142166	0.0219042	0.0297562	ALK84611.1	Carboxynorspermidine dehydrogenase, putative [Phocaeicola vulgatus]	1.65947	none
FHJOOPKJ_00975	370	420.667	180.557	155.683	0.141878	0.207993	0.247105	WP_005845863.1	MULTISPECIES: GNAT family N-acetyltransferase [Bacteroidaceae]	0.681951	none
FHJOOPKJ_00959	581.667	660.667	16.3433	14.4133	0.141501	0.116919	0.14446	WP_217771769.1	MG2 domain-containing protein [Phocaeicola vulgatus]	0.932114	none
FHJOOPKJ_01301	849.667	960	156.287	136.7	0.141347	0.102625	0.128003	ABR38256.1	ribosomal large subunit pseudouridine synthase D [Phocaeicola vulgatus ATCC 8482]	0.988747	none
FHJOOPKJ_04132	616.333	699.333	147.263	130.597	0.140545	0.101096	0.126266	RHM86752.1	clindamycin resistance transfer factor BtgB [Bacteroides caccae]	0.995268	none
FHJOOPKJ_03928	387.333	440	137.017	119.003	0.140502	0.160099	0.193455	WP_005840435.1	MULTISPECIES: uracil-DNA glycosylase [Bacteroidaceae]	0.795612	none
FHJOOPKJ_03622	52	58.6667	9.25667	8.08	0.140319	0.591065	0.633335	AII69152.1	hypothetical protein GV66_16265 [Phocaeicola dorei]	0.228364	none
FHJOOPKJ_02783	1138	1286	97.3	85.9467	0.140053	0.0830705	0.10475	WP_005846639.1	MULTISPECIES: excinuclease ABC subunit UvrB [Bacteroidaceae]	1.08055	none
FHJOOPKJ_01045	168.667	192.333	63.26	55.0233	0.138261	0.380967	0.428122	WP_016270045.1	outer membrane beta-barrel protein [Phocaeicola vulgatus]	0.419113	none
FHJOOPKJ_01541	127.667	145	79.09	68.3	0.13798	0.374	0.421194	EFG18429.1	positive regulator of sigma(E), RseC/MucC [Phocaeicola vulgatus PC510]	0.427128	none
FHJOOPKJ_00036	172	196	15.5867	13.7233	0.13788	0.336174	0.381869	WP_008670274.1	MULTISPECIES: glycoside hydrolase family 127 protein [Bacteroidaceae]	0.473436	none	PUL2	GH146
FHJOOPKJ_02491	383	436	47.6367	42.18	0.137626	0.152197	0.185002	RHK21124.1	type I restriction endonuclease subunit R [Phocaeicola vulgatus]	0.817593	none
FHJOOPKJ_01009	589.333	669.333	29.31	25.8933	0.137562	0.169206	0.20379	ALK83825.1	SusC, outer membrane protein involved in starch binding [Phocaeicola vulgatus]	0.771583	none	PUL15	susC
FHJOOPKJ_03287	7173.33	8174.67	571.29	504.287	0.137044	0.0179086	0.0246167	WP_117699991.1	ribonuclease R [Phocaeicola vulgatus]	1.74694	none
FHJOOPKJ_01049	36.6667	41	3.89	3.47333	0.136199	0.711879	0.748521	WP_005846096.1	MULTISPECIES: bifunctional aspartate transaminase/aspartate 4-decarboxylase [Bacteroidaceae]	0.147594	none
FHJOOPKJ_02046	5816.67	6614.33	541.383	477.723	0.136151	0.0236274	0.0319169	WP_005840196.1	MULTISPECIES: DNA mismatch repair endonuclease MutL [Bacteroidaceae]	1.62658	none
FHJOOPKJ_04118	851.333	971	123.35	109.297	0.136118	0.0989484	0.123711	EOR98551.1	hypothetical protein C800_03568 [Phocaeicola vulgatus dnLKV7]	1.00459	none
FHJOOPKJ_03842	40.3333	46	32.24	27.92	0.134066	0.603212	0.645334	WP_011965743.1	MULTISPECIES: D-Ala-D-Ala carboxypeptidase family metallohydrolase [Bacteroidaceae]	0.21953	none
FHJOOPKJ_00342	5	5.66667	4.56	4.03667	0.132142	0.876043	0.897523	KDS29171.1	bacterial DNA-binding family protein [Phocaeicola vulgatus str. 3775 SR(B) 19]	0.0574744	none
FHJOOPKJ_01141	268.667	307	75.6267	66.7067	0.132055	0.225378	0.26587	WP_118171018.1	SGNH/GDSL hydrolase family protein [Phocaeicola vulgatus]	0.647088	none
FHJOOPKJ_00698	183	210.333	12.7533	11.2633	0.130823	0.343763	0.389767	QUT57958.1	Patatin-like phospholipase [Phocaeicola vulgatus]	0.463741	none
FHJOOPKJ_00152	2732.67	3126	152.937	135.703	0.130505	0.0318254	0.0423533	WP_011964676.1	MULTISPECIES: phosphoenolpyruvate synthase [Bacteroidaceae]	1.49723	none
FHJOOPKJ_02423	74	84.6667	18.1	16.1367	0.129913	0.472243	0.518962	WP_216943473.1	hypothetical protein [Phocaeicola vulgatus]	0.325834	none
FHJOOPKJ_03030	3314.33	3803	493.873	438.493	0.128945	0.0508584	0.0661033	WP_117699848.1	GTPase HflX [Phocaeicola vulgatus]	1.29364	none	PUL41	Unk
FHJOOPKJ_01120	4649.33	5325.67	847.55	753.317	0.127537	0.069058	0.0879856	WP_032952515.1	3-methyl-2-oxobutanoate dehydrogenase subunit VorB [Phocaeicola vulgatus]	1.16079	none
FHJOOPKJ_01294	2221.33	2535.67	4282.39	3619.35	0.127369	0.0973047	0.121738	WP_005838940.1	MULTISPECIES: 30S ribosomal protein S20 [Bacteroidaceae]	1.01187	none
FHJOOPKJ_03626	14.6667	16.6667	11.41	10.21	0.126734	0.79694	0.826149	WP_216943762.1	DUF551 domain-containing protein [Phocaeicola vulgatus]	0.0985743	none
FHJOOPKJ_00843	1524	1752	106.2	94.5033	0.125892	0.0681539	0.0868638	WP_117699471.1	ATP-binding protein [Phocaeicola vulgatus]	1.16651	none
FHJOOPKJ_04007	415.667	478.333	89.0533	78.26	0.124731	0.201975	0.240343	WP_005852038.1	MULTISPECIES: GNAT family N-acetyltransferase [Bacteroidaceae]	0.694703	none
FHJOOPKJ_00930	400	459	321.103	273.317	0.124428	0.197757	0.235782	ALK83737.1	hypothetical protein BvMPK_1121 [Phocaeicola vulgatus]	0.703868	none
FHJOOPKJ_02128	59.6667	69.6667	13.9667	12.1633	0.123709	0.635895	0.676363	BDC07024.1	AraC family transcriptional regulator [Phocaeicola vulgatus]	0.196614	none
FHJOOPKJ_02375	975.333	1123.33	636.07	564.443	0.122317	0.248088	0.289043	WP_016270180.1	MULTISPECIES: hypothetical protein [Phocaeicola]	0.605394	none
FHJOOPKJ_03305	75.6667	87	68.0067	58.3567	0.12132	0.502343	0.548106	WP_117677952.1	GtrA family protein [Phocaeicola vulgatus]	0.298999	none
FHJOOPKJ_01213	2871	3299	321.747	287.107	0.120812	0.0817531	0.10323	WP_032944945.1	transporter [Phocaeicola vulgatus]	1.0875	none	PUL16	Unk
FHJOOPKJ_01908	3704.33	4254.67	429.413	384.14	0.120555	0.0730687	0.0928702	ABR40603.1	conserved hypothetical protein [Phocaeicola vulgatus ATCC 8482]	1.13627	none
FHJOOPKJ_02369	23.6667	27	3.69333	3.32667	0.119593	0.792519	0.822029	WP_005816149.1	MULTISPECIES: putative resistance-associated DNA invertase [Bacteroidales]	0.10099	none
FHJOOPKJ_03093	6233	7177.33	602.12	538.193	0.119446	0.0439825	0.0576555	WP_005849510.1	MULTISPECIES: long-chain fatty acid--CoA ligase [Phocaeicola]	1.35672	none
FHJOOPKJ_00470	1043.33	1204.67	162.437	145.103	0.117079	0.117738	0.145276	WP_057250037.1	hypothetical protein [Phocaeicola vulgatus]	0.929084	none
FHJOOPKJ_03263	130.333	149.667	31.1	27.83	0.116267	0.460358	0.507111	WP_081415332.1	DUF5119 domain-containing protein [Parabacteroides massiliensis]	0.336904	none
FHJOOPKJ_02884	1327	1536.67	193.757	172.863	0.115304	0.119103	0.146911	WP_005845319.1	MULTISPECIES: phospho-N-acetylmuramoyl-pentapeptide-transferase [Bacteroidaceae]	0.924077	none
FHJOOPKJ_00748	2119.33	2460.33	173.73	155.787	0.114956	0.120072	0.147908	WP_005840019.1	MULTISPECIES: S9 family peptidase [Bacteroidaceae]	0.920557	none
FHJOOPKJ_02058	10399.7	11992.3	532.627	478.613	0.114354	0.0634043	0.0812327	WP_057280741.1	carbamoyl-phosphate synthase (glutamine-hydrolyzing) large subunit [Phocaeicola vulgatus]	1.19788	none
FHJOOPKJ_02583	42	48.6667	132.493	114.36	0.114337	0.624208	0.665665	WP_100262999.1	DNA damage-inducible protein D [Phocaeicola vulgatus]	0.204671	none
FHJOOPKJ_00657	357.667	415.667	72.4867	64.6633	0.11296	0.323832	0.369499	ALK82915.1	GSCFA Domain-Containing Protein [Phocaeicola vulgatus]	0.48968	none
FHJOOPKJ_02566	243.333	281	62.3533	55.6533	0.112948	0.392302	0.439401	WP_005843938.1	MULTISPECIES: prolipoprotein diacylglyceryl transferase [Bacteroidaceae]	0.40638	none
FHJOOPKJ_02044	2562	2956	270.697	241.977	0.112304	0.11299	0.140029	WP_005840200.1	MULTISPECIES: hypothetical protein [Bacteroidaceae]	0.946959	none
FHJOOPKJ_03508	529.333	615.667	48.8733	43.8133	0.111583	0.21042	0.249666	WP_005816267.1	MULTISPECIES: ssDNA-binding domain-containing protein [Bacteroidales]	0.676912	none
FHJOOPKJ_01196	153.667	178	75.2367	66.37	0.111423	0.422585	0.470719	EEB23304.1	transcriptional regulator, AsnC family [Phocaeicola dorei DSM 17855]	0.374086	none
FHJOOPKJ_02087	1383.33	1605.67	350.363	313.853	0.10994	0.105547	0.131247	WP_022509065.1	MULTISPECIES: DUF4373 domain-containing protein [Bacteroidaceae]	0.976554	none
FHJOOPKJ_03266	140.333	162	28.8833	26.1433	0.109619	0.501037	0.547165	WP_075964293.1	fimbrillin family protein [Parabacteroides massiliensis]	0.30013	none
FHJOOPKJ_00471	639	743.333	231.07	205.187	0.109342	0.195658	0.233506	WP_005851731.1	MULTISPECIES: ATP-binding cassette domain-containing protein [Bacteroidaceae]	0.708503	none
FHJOOPKJ_03218	28	32.6667	4.90667	4.34333	0.109234	0.673741	0.711472	WP_177601332.1	CDP-glucose 4,6-dehydratase [Phocaeicola vulgatus]	0.171507	none
FHJOOPKJ_00901	34609	40182.7	1917.13	1723.02	0.109158	0.0508579	0.0661033	WP_175324213.1	protein translocase subunit SecDF [Phocaeicola vulgatus]	1.29364	none
FHJOOPKJ_01191	41.3333	48	41.5	35.9933	0.108837	0.650657	0.689869	WP_005848059.1	MULTISPECIES: hypothetical protein [Bacteroidaceae]	0.186648	none
FHJOOPKJ_00531	817.333	953.333	120.677	108.8	0.108804	0.29584	0.33962	ALK85797.1	putative ATPase involved in transport [Phocaeicola vulgatus]	0.528944	none
FHJOOPKJ_02518	1269.67	1471.33	134.237	121.597	0.107565	0.167857	0.202298	WP_005852754.1	MULTISPECIES: phosphomethylpyrimidine synthase ThiC [Bacteroidaceae]	0.77506	none
FHJOOPKJ_01232	2860.67	3318	296.027	266.343	0.107261	0.152978	0.185827	WP_117699792.1	TonB-dependent receptor [Phocaeicola vulgatus]	0.815372	none
FHJOOPKJ_02514	267	310	87.3933	77.8333	0.106469	0.367914	0.414594	WP_074783903.1	HesA/MoeB/ThiF family protein [Phocaeicola vulgatus]	0.434253	none
FHJOOPKJ_00220	838.667	978.333	397.217	351.617	0.106466	0.239246	0.280429	WP_005845164.1	MULTISPECIES: hypothetical protein [Bacteroidaceae]	0.621155	none
FHJOOPKJ_02716	18	21	3.8	3.40333	0.105673	0.814407	0.841574	HAY24510.1	anti-sigma factor [Bacteroides sp.]	0.0891585	none
FHJOOPKJ_04036	3270	3813	203.833	183.807	0.104782	0.125665	0.154383	WP_005843601.1	MULTISPECIES: DNA gyrase/topoisomerase IV subunit A [Bacteroidaceae]	0.900787	none
FHJOOPKJ_00350	12.3333	14.3333	2.39667	2.17333	0.103819	0.843681	0.867996	WP_074783152.1	N-acetylneuraminate synthase [Phocaeicola vulgatus]	0.0738215	none
FHJOOPKJ_02129	126.667	147.333	12.8133	11.6167	0.102308	0.480467	0.526424	WP_117699647.1	1-deoxy-D-xylulose-5-phosphate synthase [Phocaeicola vulgatus]	0.318336	none
FHJOOPKJ_03676	79.6667	93	83.1267	71.74	0.100619	0.586017	0.629134	OKZ49773.1	diacylglycerol kinase [Phocaeicola vulgatus]	0.23209	none
FHJOOPKJ_02563	13.6667	16	29.1833	24.6133	0.0999713	0.854139	0.878018	WP_005849888.1	MULTISPECIES: hypothetical protein [Bacteroidaceae]	0.0684714	none
FHJOOPKJ_01121	487.667	567	1131.87	980.67	0.099523	0.349395	0.395544	WP_005846178.1	MULTISPECIES: 4Fe-4S binding protein [Bacteroidaceae]	0.456683	none
FHJOOPKJ_00410	738.667	862	739.293	648.237	0.0984653	0.243963	0.28514	WP_074783274.1	response regulator [Phocaeicola vulgatus]	0.612677	none
FHJOOPKJ_02857	1582.33	1852	385.203	345.09	0.098134	0.155631	0.188738	WP_005846273.1	MULTISPECIES: ATP phosphoribosyltransferase [Bacteroidaceae]	0.807905	none
FHJOOPKJ_04137	6888.33	8063	1004.72	906.527	0.0980287	0.104633	0.13033	WP_016269947.1	adenylosuccinate synthase [Phocaeicola vulgatus]	0.980331	none
FHJOOPKJ_00475	1310	1535.67	189.91	171.24	0.0978269	0.174597	0.209871	WP_012055782.1	MFS transporter [Phocaeicola vulgatus]	0.757962	none
FHJOOPKJ_00794	38.6667	45	4.39333	4.02333	0.0968658	0.719211	0.754935	WP_005843683.1	IS21 family transposase [Phocaeicola vulgatus]	0.143144	none
FHJOOPKJ_02045	399.667	467.333	584.677	502.437	0.0964262	0.433357	0.481406	WP_005840198.1	MULTISPECIES: hypothetical protein [Bacteroidaceae]	0.363155	none
FHJOOPKJ_03677	802.333	943.667	616.26	542.343	0.09457	0.246811	0.288011	ALK85055.1	hypothetical protein BvMPK_2460 [Phocaeicola vulgatus]	0.607636	none
FHJOOPKJ_02515	382	446.333	65.08	58.9467	0.0943903	0.426923	0.474976	WP_005845953.1	MULTISPECIES: 2-iminoacetate synthase ThiH [Bacteroidaceae]	0.36965	none
FHJOOPKJ_02517	196	230.333	103.923	91.7033	0.0932432	0.412971	0.461128	WP_005845957.1	MULTISPECIES: hypothetical protein [Bacteroidaceae]	0.38408	none
FHJOOPKJ_03546	1475	1718.67	161.807	146.953	0.0931889	0.340533	0.386344	KAB6445857.1	alpha-galactosidase [Phocaeicola vulgatus]	0.467841	none
FHJOOPKJ_03437	419.667	493	50.9267	46.1733	0.0926858	0.353948	0.400082	WP_117700380.1	hypothetical protein [Phocaeicola vulgatus]	0.451061	none
FHJOOPKJ_02879	565	663.667	169.893	152.643	0.0924085	0.346583	0.392602	WP_005845306.1	MULTISPECIES: hypothetical protein [Bacteroidaceae]	0.460193	none
FHJOOPKJ_03919	200.333	235.667	37.5133	33.92	0.0916258	0.462626	0.509112	WP_005844505.1	MULTISPECIES: bifunctional diaminohydroxyphosphoribosylaminopyrimidine deaminase/5-amino-6-(5-phosphoribosylamino)uracil reductase RibD [Bacteroidaceae]	0.33477	none
FHJOOPKJ_04112	240.333	282	138.29	122.887	0.0915357	0.491789	0.538187	WP_005848903.1	MULTISPECIES: peptide-methionine (S)-S-oxide reductase MsrA [Bacteroidaceae]	0.308221	none
FHJOOPKJ_03034	398.667	468.667	18.9133	17.3	0.0914262	0.456556	0.503526	WP_005850671.1	AAA domain-containing protein [Phocaeicola vulgatus]	0.340506	none
FHJOOPKJ_03498	394.667	463.667	71.6833	65.3933	0.0913912	0.427857	0.475728	WP_117875696.1	DUF4369 domain-containing protein [Phocaeicola vulgatus]	0.368701	none
FHJOOPKJ_03099	150.333	176.667	127.857	113.7	0.0904757	0.543126	0.58772	WP_005845500.1	MULTISPECIES: VanZ family protein [Bacteroidaceae]	0.265099	none
FHJOOPKJ_00610	392.333	461.667	218.293	195.33	0.0899969	0.407209	0.455108	WP_016270970.1	MULTISPECIES: cupin domain-containing protein [Phocaeicola]	0.390183	none	PUL9	Unk
FHJOOPKJ_02135	665	782.667	123.35	112.013	0.0897709	0.324897	0.370548	WP_016271293.1	MULTISPECIES: ribonucleotide-diphosphate reductase subunit beta [Bacteroidaceae]	0.488254	none
FHJOOPKJ_03163	108.333	128.333	53.4333	47.1833	0.0874027	0.578845	0.622162	WP_005844749.1	MULTISPECIES: DUF4199 domain-containing protein [Bacteroidaceae]	0.237437	none
FHJOOPKJ_03901	626.333	736	155.063	140.71	0.0872705	0.300428	0.344457	WP_011965655.1	MULTISPECIES: ATPase [Phocaeicola]	0.52226	none
FHJOOPKJ_03094	7208.67	8467	1235.74	1125.02	0.0872236	0.243466	0.28465	WP_005845487.1	MULTISPECIES: peptide chain release factor 2 [Bacteroidaceae]	0.613562	none
FHJOOPKJ_02786	671	790	433.077	386.917	0.0863003	0.286126	0.329086	ALK85316.1	hypothetical protein BvMPK_2726 [Phocaeicola vulgatus]	0.543442	none
FHJOOPKJ_02310	2578.67	3054.33	1726.07	1534.43	0.0862156	0.269566	0.3115	WP_005846375.1	MULTISPECIES: thioredoxin-dependent thiol peroxidase [Bacteroidaceae]	0.569335	none
FHJOOPKJ_04107	10553.3	12432.3	1391.37	1272.86	0.0850254	0.153558	0.186471	WP_005840840.1	MULTISPECIES: 3-isopropylmalate dehydratase large subunit [Bacteroidaceae]	0.813728	none
FHJOOPKJ_00587	2014.33	2384.67	609.273	550.557	0.0843273	0.228349	0.269029	ALK82830.1	Ribosomal RNA small subunit methyltransferase I [Phocaeicola vulgatus]	0.641401	none
FHJOOPKJ_02282	2416.33	2857	313.58	287.5	0.08351	0.255129	0.296401	ABR37731.1	chromosomal replication initiator protein DnaA [Phocaeicola vulgatus ATCC 8482]	0.59324	none
FHJOOPKJ_02576	364	427.667	35.1667	32.3333	0.0834664	0.442754	0.490442	WP_011965089.1	MULTISPECIES: excinuclease ABC subunit UvrC [Bacteroidaceae]	0.353838	none
FHJOOPKJ_01446	993	1168	407.95	369.703	0.082904	0.327754	0.373343	WP_005841615.1	MULTISPECIES: dephospho-CoA kinase [Bacteroidaceae]	0.484452	none
FHJOOPKJ_00372	32	37.6667	2.25333	2.07333	0.0827862	0.785968	0.816847	WP_117700393.1	hypothetical protein [Phocaeicola vulgatus]	0.104595	none
FHJOOPKJ_03870	45	53.3333	7.01	6.41333	0.0795434	0.746917	0.780675	WP_005848148.1	MULTISPECIES: glycoside hydrolase family 88 protein [Bacteroidaceae]	0.126727	none
FHJOOPKJ_03159	96	114	42.0533	37.7833	0.0790291	0.616115	0.657416	WP_005844730.1	MULTISPECIES: manganese efflux pump MntP family protein [Bacteroidaceae]	0.210338	none
FHJOOPKJ_04159	35.3333	41.6667	75.84	67.5067	0.0775026	0.801031	0.829921	RYT97590.1	hypothetical protein EAJ02_01570 [Phocaeicola dorei]	0.0963508	none
FHJOOPKJ_01037	2189.67	2600.33	171.497	157.953	0.0770138	0.224473	0.264886	WP_117699400.1	S46 family peptidase [Phocaeicola vulgatus]	0.648836	none
FHJOOPKJ_03366	1121.33	1330.67	477.48	432.693	0.0757633	0.302565	0.3468	WP_005847433.1	MULTISPECIES: Maf-like protein [Phocaeicola]	0.519181	none
FHJOOPKJ_00673	1524.33	1820.67	295.123	269.387	0.0754894	0.337086	0.382787	WP_005841268.1	MULTISPECIES: tRNA (adenosine(37)-N6)-threonylcarbamoyltransferase complex transferase subunit TsaD [Bacteroidaceae]	0.472259	none
FHJOOPKJ_02913	3274.67	3893	1377.32	1247.92	0.075094	0.2365	0.277742	WP_016271920.1	FKBP-type peptidyl-prolyl cis-trans isomerase [Phocaeicola vulgatus]	0.626169	none
FHJOOPKJ_00881	1183	1402.67	366.267	338.583	0.0735888	0.334803	0.380548	WP_117699487.1	3-oxoacyl-ACP reductase FabG [Phocaeicola vulgatus]	0.47521	none
FHJOOPKJ_01680	1316.67	1567.33	342.673	314.303	0.0705407	0.318929	0.364306	WP_117699818.1	SDR family oxidoreductase [Phocaeicola vulgatus]	0.496306	none
FHJOOPKJ_01518	8.66667	10.3333	21.8433	19.52	0.070458	0.907163	0.926309	WP_032952811.1	MULTISPECIES: DUF4248 domain-containing protein [Bacteroidaceae]	0.0423145	none
FHJOOPKJ_01354	49.3333	58.6667	20.8967	19.17	0.0703559	0.759061	0.791568	MBT0709094.1	hypothetical protein [Phocaeicola vulgatus]	0.119723	none
FHJOOPKJ_02096	636.667	761	568.877	508.207	0.069994	0.458496	0.505363	WP_005846592.1	MULTISPECIES: TraR/DksA C4-type zinc finger protein [Bacteroidaceae]	0.338664	none
FHJOOPKJ_01904	435	517	173.803	158.573	0.0695647	0.501918	0.547805	WP_005846771.1	MULTISPECIES: ribosome biogenesis GTP-binding protein YihA/YsxC [Bacteroidaceae]	0.299367	none
FHJOOPKJ_00313	71.3333	85.6667	10.3833	9.51667	0.0692081	0.731479	0.765627	EET14645.2	outer membrane efflux protein [Bacteroides sp. 4_3_47FAA]	0.135798	none
FHJOOPKJ_02597	841.333	1000.33	532.317	486.963	0.0689374	0.498369	0.544739	EFG16994.1	pantetheine-phosphate adenylyltransferase [Phocaeicola vulgatus PC510]	0.302449	none
FHJOOPKJ_01655	10.3333	12.3333	0.653333	0.61	0.0688693	0.941896	0.956463	WP_220429300.1	hypothetical protein, partial [Phocaeicola vulgatus]	0.0259969	none
FHJOOPKJ_02778	1392	1659.33	224.12	206.86	0.0687615	0.349934	0.396031	WP_117700178.1	mannonate dehydratase [Phocaeicola vulgatus]	0.456014	none
FHJOOPKJ_03445	38	45	8.18667	7.65667	0.0670337	0.853473	0.877579	KAB3555193.1	site-specific integrase [Phocaeicola vulgatus]	0.0688101	none
FHJOOPKJ_03440	8.66667	10.3333	1.61333	1.48333	0.0665682	1	1	WP_216951029.1	DUF3868 domain-containing protein [Phocaeicola vulgatus]	0	none
FHJOOPKJ_00487	499.333	597	196.28	179.19	0.0658189	0.590819	0.633335	WP_005839359.1	MULTISPECIES: outer-membrane lipoprotein carrier protein LolA [Bacteroidaceae]	0.228545	none
FHJOOPKJ_01262	17.6667	21	27.73	25.3033	0.0647558	0.939568	0.954626	WP_005838878.1	MULTISPECIES: LysO family transporter [Bacteroidaceae]	0.0270718	none	PUL18	Unk
FHJOOPKJ_02860	2030	2428	346.06	319.043	0.0643034	0.325116	0.370683	WP_016270106.1	bifunctional histidinol-phosphatase/imidazoleglycerol-phosphate dehydratase HisB [Phocaeicola vulgatus]	0.487961	none
FHJOOPKJ_00706	148.667	178.333	114.393	102.54	0.0638589	0.639143	0.678783	WP_005852511.1	helix-turn-helix transcriptional regulator [Phocaeicola vulgatus]	0.194402	none
FHJOOPKJ_00641	75.3333	90.3333	10.2033	9.43667	0.0636741	0.715895	0.751884	WP_117833542.1	DUF3874 domain-containing protein [Phocaeicola vulgatus]	0.145151	none
FHJOOPKJ_02363	52.3333	62.6667	13.26	12.2633	0.0617557	0.78879	0.819222	WP_005816133.1	MULTISPECIES: conjugative transposon protein TraN [Bacteroidales]	0.103039	none
FHJOOPKJ_01986	3352.33	4003.33	457.977	424.36	0.0614198	0.387854	0.435197	WP_005839240.1	MULTISPECIES: RIP metalloprotease RseP [Bacteroidaceae]	0.411332	none
FHJOOPKJ_00501	7710.67	9260.67	572.283	533.65	0.0602808	0.339158	0.384902	WP_005851768.1	bifunctional dihydroorotate dehydrogenase B NAD binding subunit/NADPH-dependent glutamate synthase [Phocaeicola vulgatus]	0.469598	none
FHJOOPKJ_03528	70.3333	84.3333	29.1	27.13	0.0583336	0.816257	0.843083	AIM40121.1	sugar isomerase [Bacteroides fragilis]	0.0881733	none
FHJOOPKJ_00790	3853.67	4654.67	1140.08	1046.37	0.0582249	0.401595	0.448971	WP_005839937.1	MULTISPECIES: YebC/PmpR family DNA-binding transcriptional regulator [Bacteroidaceae]	0.396212	none
FHJOOPKJ_04208	1572	1893.33	169.77	159.073	0.0581783	0.420455	0.468631	WP_004312011.1	MULTISPECIES: IS66-like element ISBf10 family transposase [Bacteroidales]	0.376281	none
FHJOOPKJ_03885	1212.67	1459	340.197	314.317	0.0581274	0.427448	0.475417	WP_005843440.1	MULTISPECIES: 23S rRNA (guanosine(2251)-2'-O)-methyltransferase RlmB [Bacteroidaceae]	0.369116	none
FHJOOPKJ_03158	812.667	977.333	156.893	144.57	0.0580165	0.46327	0.509555	WP_008669987.1	MULTISPECIES: FAD:protein FMN transferase [Bacteroidaceae]	0.334166	none
FHJOOPKJ_00528	194.333	234.667	82.34	74.8967	0.0577936	0.637861	0.677865	WP_005845194.1	MULTISPECIES: DUF4194 domain-containing protein [Bacteroidaceae]	0.195274	none
FHJOOPKJ_00923	832.333	1001.33	585.927	543.243	0.0558585	0.520381	0.565605	WP_008669352.1	MULTISPECIES: hypothetical protein [Bacteroidaceae]	0.283678	none
FHJOOPKJ_02710	1818.67	2206	490.993	453.46	0.0557304	0.476943	0.523186	WP_005839711.1	MULTISPECIES: glucosamine-6-phosphate deaminase [Bacteroidaceae]	0.321534	none
FHJOOPKJ_02185	491.667	595	70.17	65.33	0.0531698	0.551401	0.595402	WP_117699603.1	glycoside hydrolase family 88 protein [Phocaeicola vulgatus]	0.258533	none
FHJOOPKJ_01296	145.333	174.333	43.4633	40.58	0.0528709	0.764499	0.796561	EET13898.2	DNA repair protein RecO [Bacteroides sp. 4_3_47FAA]	0.116623	none
FHJOOPKJ_02919	748.667	902.333	585.847	530.72	0.0528193	0.511892	0.556871	WP_057098946.1	MULTISPECIES: HIT family protein [Bacteroidaceae]	0.290822	none
FHJOOPKJ_01231	2848.33	3434.67	165.073	154.69	0.0525235	0.401488	0.448971	EFG19569.1	putative tol-pal system protein YbgF [Phocaeicola vulgatus PC510]	0.396327	none
FHJOOPKJ_01171	2582	3115	261.147	243.837	0.051418	0.419226	0.467403	WP_016270342.1	bifunctional metallophosphatase/5'-nucleotidase [Phocaeicola vulgatus]	0.377551	none
FHJOOPKJ_01886	36.6667	44.3333	9.58333	8.83	0.051009	0.871282	0.893211	WP_016270452.1	MULTISPECIES: UDP-2,3-diacylglucosamine diphosphatase [Bacteroidaceae]	0.0598412	none
FHJOOPKJ_01819	493	594.333	183.063	169.69	0.0503469	0.593809	0.636014	WP_005841960.1	MULTISPECIES: HU family DNA-binding protein [Bacteroidaceae]	0.226353	none
FHJOOPKJ_04158	35.6667	43	90.1833	82.0967	0.0500503	0.889197	0.909479	WP_135951232.1	hypothetical protein [Phocaeicola sartorii]	0.0510019	none
FHJOOPKJ_01667	524.667	632	91.7133	86.0433	0.0488976	0.61217	0.653776	MBT0707939.1	tRNA-specific 2-thiouridylase MnmA [Phocaeicola vulgatus]	0.213128	none
FHJOOPKJ_00878	675.667	814	156.42	146.663	0.0477344	0.614909	0.65651	WP_022508332.1	acyltransferase [Phocaeicola vulgatus]	0.211189	none
FHJOOPKJ_01038	2468	3000	195.883	183.937	0.0473549	0.51072	0.556091	WP_117699401.1	S46 family peptidase [Phocaeicola vulgatus]	0.291817	none
FHJOOPKJ_03160	260.333	316.333	83.3367	76.34	0.0467459	0.655761	0.69428	WP_117700048.1	DUF6048 family protein [Phocaeicola vulgatus]	0.183254	none
FHJOOPKJ_02186	74	89.6667	86.2367	77.3233	0.0465397	0.814567	0.841574	WP_016271107.1	hypothetical protein [Phocaeicola vulgatus]	0.0890733	none
FHJOOPKJ_00010	1292.67	1571.67	198.843	186.783	0.0455665	0.609831	0.651467	WP_118327443.1	HD domain-containing protein [Phocaeicola vulgatus]	0.21479	none
FHJOOPKJ_02998	3628	4415	4158.12	3747.49	0.0446911	0.546757	0.590954	WP_005839898.1	MULTISPECIES: hypothetical protein [Bacteroidaceae]	0.262206	none
FHJOOPKJ_01313	2354	2864.33	219.377	206.743	0.0438463	0.536921	0.581519	WP_005840273.1	MULTISPECIES: alpha-L-fucosidase [Bacteroidaceae]	0.27009	none	PUL20	GH29
FHJOOPKJ_01125	1033	1255.33	727.68	675.13	0.0430802	0.555237	0.599239	WP_007837184.1	MULTISPECIES: ribose 5-phosphate isomerase B [Bacteroidaceae]	0.255521	none
FHJOOPKJ_03230	12	14.6667	2.02667	1.88333	0.0429107	1	1	WP_008654805.1	MULTISPECIES: DUF1972 domain-containing protein [Bacteroidaceae]	0	none
FHJOOPKJ_02581	724.667	881	546.26	502.573	0.0425181	0.609811	0.651467	WP_005843908.1	MULTISPECIES: rRNA maturation RNase YbeY [Bacteroidaceae]	0.214804	none
FHJOOPKJ_03282	3186.33	3874.33	401.507	378.027	0.0421509	0.493016	0.539369	WP_057280385.1	THUMP domain-containing protein [Phocaeicola vulgatus]	0.307139	none
FHJOOPKJ_03737	10688.3	13056	2354.71	2198.16	0.0418675	0.529482	0.574139	WP_005843532.1	MULTISPECIES: NAD(P)-binding domain-containing protein [Bacteroidaceae]	0.276149	none
FHJOOPKJ_00798	3.66667	4.33333	0.746667	0.766667	0.0406357	1	1	WP_005843693.1	DUF5712 family protein [Phocaeicola vulgatus]	0	none
FHJOOPKJ_01549	7198.67	8811.67	1356.51	1266.94	0.0378715	0.559079	0.602855	WP_005841511.1	MULTISPECIES: UDP-glucose 4-epimerase GalE [Bacteroidaceae]	0.252527	none
FHJOOPKJ_03012	1929	2353.67	610.493	569.493	0.0375709	0.559598	0.603237	ALK83710.1	Uridine monophosphate kinase [Phocaeicola vulgatus]	0.252124	none
FHJOOPKJ_03382	944	1153.67	154.813	145.067	0.0371105	0.684185	0.721879	WP_117695261.1	acyltransferase [Phocaeicola vulgatus]	0.164826	none
FHJOOPKJ_01671	633.333	775	255.817	236.043	0.0362648	0.688799	0.726539	WP_005838734.1	MULTISPECIES: SIS domain-containing protein [Bacteroidaceae]	0.161907	none	PUL24	Unk
FHJOOPKJ_02578	643.333	785.333	61.6933	58.3333	0.0352485	0.715199	0.751367	WP_005843914.1	MULTISPECIES: tRNA uridine-5-carboxymethylaminomethyl(34) synthesis enzyme MnmG [Bacteroidaceae]	0.145573	none
FHJOOPKJ_01987	1199.33	1467	197.593	187.573	0.0329504	0.651255	0.690105	WP_032952603.1	MULTISPECIES: 1-deoxy-D-xylulose-5-phosphate reductoisomerase [Bacteroidaceae]	0.186249	none
FHJOOPKJ_00003	679	827	85.7333	81.4067	0.032689	0.718352	0.754249	WP_117694380.1	carbon starvation protein A [Phocaeicola vulgatus]	0.143662	none
FHJOOPKJ_02987	422.667	518.333	156.587	145.867	0.0320983	0.724921	0.759845	WP_005846047.1	MULTISPECIES: endonuclease III [Bacteroidaceae]	0.139709	none
FHJOOPKJ_00005	385.667	472.333	76.6733	72.3333	0.0317951	0.806969	0.835133	WP_005843020.1	MULTISPECIES: virulence RhuM family protein [Bacteroidaceae]	0.0931429	none
FHJOOPKJ_00987	431.333	529	39.86	37.7	0.0305309	0.747411	0.780969	WP_117696496.1	AAA domain-containing protein [Phocaeicola vulgatus]	0.12644	none
FHJOOPKJ_02861	1115	1370	98.6267	93.7467	0.0295978	0.681171	0.718906	ALK84596.1	NAD synthetase / Glutamine amidotransferase chain of NAD synthetase [Phocaeicola vulgatus]	0.166744	none
FHJOOPKJ_00479	15.3333	19	2.60667	2.42	0.0294536	0.939362	0.954626	WP_032952432.1	galactose mutarotase [Phocaeicola vulgatus]	0.0271672	none
FHJOOPKJ_01613	3803.33	4668	337.44	319.857	0.0293147	0.665766	0.704061	WP_057098892.1	ABC-F family ATP-binding cassette domain-containing protein [Phocaeicola vulgatus]	0.176678	none
FHJOOPKJ_03936	7.66667	9.33333	13.1767	12.39	0.0291093	1	1	WP_005840453.1	MULTISPECIES: PqqD family protein [Bacteroidaceae]	0	none
FHJOOPKJ_02417	1236.67	1515	303.4	285.347	0.0286995	0.698723	0.736584	WP_117699857.1	NTP transferase domain-containing protein [Phocaeicola vulgatus]	0.155695	none
FHJOOPKJ_04231	319.333	394.667	51.8867	49.2033	0.0284339	0.821722	0.847538	WP_016271027.1	lactonase family protein [Phocaeicola vulgatus]	0.0852748	none
FHJOOPKJ_02175	475.333	581.333	130.88	124.08	0.0280398	0.78746	0.818166	WP_117699912.1	radical SAM protein [Phocaeicola vulgatus]	0.103772	none
FHJOOPKJ_01467	6193	7548.67	1049.9	1003.98	0.0278517	0.758932	0.791568	WP_057099310.1	Wzz/FepE/Etk N-terminal domain-containing protein [Phocaeicola vulgatus]	0.119797	none
FHJOOPKJ_01492	16.6667	20.6667	5.43667	5.09667	0.027702	0.939305	0.954626	WP_016270643.1	MULTISPECIES: GNAT family N-acetyltransferase [Bacteroidaceae]	0.0271934	none
FHJOOPKJ_03957	20.3333	25	1.71	1.62	0.0268814	1	1	WP_117699629.1	outer membrane beta-barrel family protein [Phocaeicola vulgatus]	0	none
FHJOOPKJ_00660	291	358	36.0967	34.31	0.0267655	0.802803	0.831289	WP_117695915.1	TrkH family potassium uptake protein [Phocaeicola vulgatus]	0.0953908	none
FHJOOPKJ_02323	98.6667	120.667	27.4967	26.1633	0.0267091	0.909525	0.928205	WP_005812861.1	MULTISPECIES: hypothetical protein [Bacteria]	0.0411853	none
FHJOOPKJ_01052	1373.67	1696.67	107.663	102.667	0.0258994	0.729487	0.763977	WP_117699403.1	tetratricopeptide repeat protein [Phocaeicola vulgatus]	0.136982	none
FHJOOPKJ_04019	536	659.333	203.167	191.363	0.0257987	0.776341	0.807984	ALK84092.1	hypothetical protein BvMPK_1485 [Phocaeicola vulgatus]	0.109947	none
FHJOOPKJ_00178	49	60.6667	10.92	10.2767	0.0254284	0.934821	0.950591	WP_117615812.1	hypothetical protein [Phocaeicola vulgatus]	0.0292715	none
FHJOOPKJ_04251	968	1192.33	509.683	476.87	0.0238258	0.790261	0.819945	WP_005845446.1	MULTISPECIES: acetyl-CoA carboxylase biotin carboxyl carrier protein subunit [Bacteria]	0.102229	none
FHJOOPKJ_03306	560.667	691.333	48.9067	46.4733	0.0227045	0.789717	0.819816	WP_117699999.1	LTA synthase family protein [Phocaeicola vulgatus]	0.102529	none
FHJOOPKJ_01274	957.333	1179	195.69	186.413	0.0225837	0.814447	0.841574	WP_100263034.1	PorV/PorQ family protein [Phocaeicola vulgatus]	0.0891371	none
FHJOOPKJ_02877	2855.33	3520.67	409.947	389.657	0.0223287	0.714893	0.75126	WP_005845300.1	MULTISPECIES: cell division protein FtsZ [Bacteroidaceae]	0.145759	none
FHJOOPKJ_01486	88.6667	109.333	289.427	261.873	0.0214724	0.922896	0.940024	WP_008782224.1	hypothetical protein [Phocaeicola vulgatus]	0.0348473	none
FHJOOPKJ_01456	2446	3017.67	433.373	412.47	0.0213691	0.751002	0.784275	WP_005841683.1	MULTISPECIES: glycine cleavage system aminomethyltransferase GcvT [Bacteroidaceae]	0.124359	none
FHJOOPKJ_00002	83.6667	103	212.16	192.813	0.0207598	0.923895	0.940521	WP_005851069.1	MULTISPECIES: hypothetical protein [Bacteroidaceae]	0.0343774	none
FHJOOPKJ_03129	3017	3734.33	525.143	499.693	0.0201876	0.758727	0.791568	WP_117677838.1	4-hydroxythreonine-4-phosphate dehydrogenase PdxA [Phocaeicola vulgatus]	0.119915	none
FHJOOPKJ_01849	620	766.667	119.813	113.697	0.0195695	0.82788	0.853171	WP_117885229.1	LacI family transcriptional regulator [Phocaeicola vulgatus]	0.0820327	none
FHJOOPKJ_04217	5.66667	7	1.54333	1.44333	0.0191559	1	1	BDC08170.1	integrase [Phocaeicola vulgatus]	0	none
FHJOOPKJ_02850	1030.33	1273.67	147.747	141.173	0.018221	0.807702	0.835656	WP_005846258.1	MULTISPECIES: ATP-binding protein [Bacteroidaceae]	0.0927489	none
FHJOOPKJ_01638	19.3333	24.3333	38.4567	33.65	0.0180705	0.951301	0.964947	RGJ90943.1	hypothetical protein DXD46_04515 [Phocaeicola vulgatus]	0.021682	none
FHJOOPKJ_04108	3497.33	4337.33	1437.04	1356.77	0.0165326	0.79649	0.825914	WP_005840842.1	MULTISPECIES: 3-isopropylmalate dehydratase small subunit [Bacteroidaceae]	0.0988199	none
FHJOOPKJ_03884	1777.33	2193	190.27	182.733	0.0162259	0.829558	0.854661	WP_005843444.1	MULTISPECIES: DNA repair protein RecN [Bacteroidaceae]	0.0811533	none
FHJOOPKJ_00064	800.333	991.333	197.687	188.69	0.0159455	0.84329	0.867836	WP_016270852.1	metallophosphatase [Phocaeicola vulgatus]	0.0740228	none
FHJOOPKJ_00219	106	131	13.86	13.3133	0.0157648	0.954222	0.967376	WP_016271345.1	TolC family protein [Phocaeicola vulgatus]	0.0203507	none
FHJOOPKJ_01903	321.667	399	40.2367	38.8	0.0157231	0.903972	0.923307	BDC06771.1	sodium:solute symporter [Phocaeicola vulgatus]	0.0438449	none
FHJOOPKJ_00909	25.3333	31.6667	68.24	61.92	0.0154884	0.960322	0.972488	EEO47530.2	hypothetical protein BSEG_03671 [Phocaeicola dorei 5_1_36/D4]	0.0175832	none
FHJOOPKJ_00128	669	826.333	166.39	158.697	0.0148523	0.880991	0.901839	WP_005843620.1	MULTISPECIES: S1-like domain-containing RNA-binding protein [Bacteroidaceae]	0.0550284	none
FHJOOPKJ_00853	160.333	196.667	77.3333	73.42	0.0146627	0.960774	0.972678	WP_016274645.1	MULTISPECIES: hypothetical protein [Phocaeicola]	0.0173786	none
FHJOOPKJ_01050	25	31	2.64	2.52667	0.0142774	1	1	WP_011965545.1	aspartate-alanine antiporter [Phocaeicola vulgatus]	0	none
FHJOOPKJ_00854	1085.33	1349.67	125.103	119.793	0.0137943	0.851941	0.876249	WP_117699493.1	ATP-binding protein [Phocaeicola vulgatus]	0.0695903	none
FHJOOPKJ_02859	2227	2762.33	416.287	398.15	0.0135045	0.840984	0.865947	WP_005846277.1	MULTISPECIES: histidinol-phosphate transaminase [Bacteroidaceae]	0.0752124	none
FHJOOPKJ_01216	66.3333	82.3333	72.3333	67.34	0.0117684	0.969354	0.979476	WP_008668591.1	MULTISPECIES: type II toxin-antitoxin system RelE/ParE family toxin [Bacteroidaceae]	0.0135178	none	PUL16	Unk
FHJOOPKJ_01072	16.6667	20.6667	2.87667	2.78	0.0115854	1	1	WP_074783196.1	polysaccharide pyruvyl transferase family protein [Phocaeicola vulgatus]	0	none
FHJOOPKJ_02040	17067.7	21192.3	2096.34	2017.59	0.0110956	0.858207	0.88146	WP_005840208.1	MULTISPECIES: IMP dehydrogenase [Bacteroidaceae]	0.0664078	none
FHJOOPKJ_01755	15	18.6667	34.4767	30.92	0.0110608	1	1	WP_005816304.1	MULTISPECIES: hypothetical protein [Bacteroidales]	0	none
FHJOOPKJ_02000	2147	2665	1228.99	1160.5	0.0109303	0.913552	0.931797	WP_005853627.1	MULTISPECIES: 2-C-methyl-D-erythritol 2,4-cyclodiphosphate synthase [Phocaeicola]	0.0392668	none
FHJOOPKJ_03844	31	38.3333	15.9167	15.2433	0.00964475	1	1	WP_182291748.1	hypothetical protein [Phocaeicola vulgatus]	0	none
FHJOOPKJ_02854	648.667	806	254.163	242.827	0.00775712	0.940355	0.955162	WP_005846267.1	MULTISPECIES: uridine kinase [Bacteroidaceae]	0.0267081	none
FHJOOPKJ_01142	365.333	457.667	68.12	65.34	0.00763759	0.949503	0.963418	WP_117699421.1	winged helix DNA-binding domain-containing protein [Phocaeicola vulgatus]	0.0225038	none
FHJOOPKJ_00325	998.667	1242.33	166.303	161.06	0.00721512	0.934154	0.950176	EET14658.2	hypothetical protein BSFG_00805 [Bacteroides sp. 4_3_47FAA]	0.0295813	none
FHJOOPKJ_00634	346	432.667	19.9033	19.1633	0.00692107	0.949531	0.963418	MBT0708451.1	Two component regulator propeller [Phocaeicola vulgatus]	0.0224907	none	PUL10	Unk
FHJOOPKJ_01623	19.6667	24.3333	0.996667	0.976667	0.00679055	1	1	WP_016269948.1	SusC/RagA family TonB-linked outer membrane protein [Phocaeicola vulgatus]	0	none	PUL23	susC
FHJOOPKJ_03270	241.667	300.667	60.06	56.4433	0.00662444	0.974645	0.984282	WP_019150881.1	MULTISPECIES: RteC domain-containing protein [Bacteroidales]	0.0111536	none
FHJOOPKJ_01079	217.333	274.333	164.613	154.08	0.00543104	0.96903	0.979418	WP_016275920.1	MULTISPECIES: putative toxin-antitoxin system toxin component, PIN family [Phocaeicola]	0.013663	none
FHJOOPKJ_03053	917.333	1150.67	92.0567	88.9633	0.00391323	0.959759	0.972186	WP_117700044.1	ATP-binding protein [Phocaeicola vulgatus]	0.0178378	none
FHJOOPKJ_03162	908	1134.67	189.62	183.057	0.00337507	0.967022	0.978195	WP_005844746.1	MULTISPECIES: glycosyltransferase family 2 protein [Bacteroidaceae]	0.0145637	none
FHJOOPKJ_00882	1641	2054	188.967	182.53	0.00261784	0.977195	0.986315	EIY78945.1	hypothetical protein HMPREF1058_01828 [Phocaeicola vulgatus CL09T03C04]	0.0100189	none
FHJOOPKJ_03527	4.33333	5.33333	13.7633	13.54	0.00235054	1	1	WP_005816226.1	MULTISPECIES: hypothetical protein [Bacteroidales]	0	none
FHJOOPKJ_00138	434.333	540.333	78.87	76.05	0.000966292	1	1	KAB6603816.1	TolC family protein [Phocaeicola vulgatus]	0	none
FHJOOPKJ_02886	1230.33	1539	96.9267	93.8567	0.000593427	0.997298	1	WP_005849607.1	MULTISPECIES: transpeptidase family protein [Bacteroidaceae]	0.00117517	none
FHJOOPKJ_00127	686.333	851.333	144.423	140.007	0.000475254	0.997947	1	WP_118327708.1	hypothetical protein [Phocaeicola vulgatus]	0.000892592	none
FHJOOPKJ_02357	146.667	183	19.13	18.57	0.000442606	1	1	EIY72221.1	hypothetical protein HMPREF1072_03575 [Bacteroides uniformis CL03T00C23]	0	none
FHJOOPKJ_03368	582.667	729	152.97	147.363	0.000308279	1	1	WP_117700367.1	Rossmann-like and DUF2520 domain-containing protein [Phocaeicola vulgatus]	0	none
FHJOOPKJ_00746	4865.33	6084.67	453.363	440.423	-0.00064586	0.992426	1	WP_005840021.1	MULTISPECIES: membrane protein insertase YidC [Bacteroidaceae]	0.003302	none
FHJOOPKJ_01404	9.66667	12	1.77333	1.76333	-0.000825438	1	1	WP_117515663.1	MULTISPECIES: tyrosine-type recombinase/integrase [Bacteroidaceae]	0	none
FHJOOPKJ_01006	249.667	312.333	34.14	33.1867	-0.00146174	1	1	ALK83822.1	Thiol:disulfide interchange protein [Phocaeicola vulgatus]	0	none
FHJOOPKJ_00962	2994.67	3751	522.217	507.753	-0.00187744	0.977962	0.986818	WP_005845843.1	MULTISPECIES: methylmalonyl Co-A mutase-associated GTPase MeaB [Bacteroidaceae]	0.00967811	none
FHJOOPKJ_02611	263.333	329	207.41	194.587	-0.00228005	0.98905	0.997733	WP_007847707.1	MULTISPECIES: acyl-CoA thioesterase [Bacteroidaceae]	0.00478188	none
FHJOOPKJ_01980	324	407.667	135.02	129.377	-0.00257183	0.998047	1	WP_005838686.1	MULTISPECIES: Holliday junction branch migration protein RuvA [Bacteroidaceae]	0.000848908	none
FHJOOPKJ_04032	2296.33	2873.33	182.617	177.58	-0.00399795	0.954156	0.967376	WP_005843610.1	MULTISPECIES: cation:proton antiporter [Bacteroidaceae]	0.0203806	none
FHJOOPKJ_01432	562	703.667	294.387	282.37	-0.00446495	0.967926	0.978572	ALK85896.1	hypothetical protein BvMPK_3326 [Phocaeicola vulgatus]	0.0141577	none
FHJOOPKJ_00295	308	387	30.39	29.4133	-0.00540663	0.967846	0.978572	WP_032952359.1	MULTISPECIES: two-component sensor histidine kinase [Bacteroidaceae]	0.0141938	none
FHJOOPKJ_02428	275.333	345.667	9.17333	8.97333	-0.0058907	0.961092	0.972732	WP_172775420.1	tape measure protein [Phocaeicola vulgatus]	0.0172352	none
FHJOOPKJ_02822	374.333	473.333	111.073	107.897	-0.00829056	0.954785	0.967681	WP_007564630.1	MULTISPECIES: ParA family protein [Bacteroidales]	0.0200942	none
FHJOOPKJ_04038	498	626	95.2133	92.6167	-0.00862957	0.923647	0.940521	WP_005843596.1	MULTISPECIES: S41 family peptidase [Bacteroidaceae]	0.034494	none
FHJOOPKJ_00563	8.33333	10.3333	1.26333	1.27667	-0.00907259	1	1	WP_172769920.1	DUF5906 domain-containing protein [Phocaeicola vulgatus]	0	none
FHJOOPKJ_00196	93.6667	118	52.2833	50.13	-0.00911237	0.97493	0.984299	ALK86559.1	Phosphodiesterase [Phocaeicola vulgatus]	0.0110266	none
FHJOOPKJ_02827	67.6667	85.3333	12.59	12.2833	-0.0102568	0.973214	0.983107	WP_015545978.1	MULTISPECIES: LuxR C-terminal-related transcriptional regulator [Bacteroidales]	0.0117915	none
FHJOOPKJ_02019	113.333	142.667	18.71	18.2133	-0.0106117	0.957816	0.970485	MBD9347252.1	hypothetical protein [Phocaeicola vulgatus]	0.0187177	none
FHJOOPKJ_02053	1106.33	1403	192.853	187.667	-0.0109717	0.907951	0.926856	WP_005852853.1	MULTISPECIES: sulfotransferase [Bacteroidaceae]	0.0419377	none
FHJOOPKJ_01126	5644	7128	490.77	479.793	-0.0113879	0.857052	0.880519	WP_117699419.1	transketolase [Phocaeicola vulgatus]	0.066993	none
FHJOOPKJ_02631	159532	201446	25347.8	24574.3	-0.0115291	0.841659	0.866399	WP_005844822.1	MULTISPECIES: elongation factor Tu [Bacteroidaceae]	0.0748641	none
FHJOOPKJ_02918	1011	1279.33	626.49	600.887	-0.0119867	0.879102	0.900317	WP_005845398.1	MULTISPECIES: transcription elongation factor GreA [Bacteroidaceae]	0.0559606	none
FHJOOPKJ_00738	271.667	342.667	83.5767	80.71	-0.0128266	0.912862	0.931352	MBP8074720.1	monofunctional biosynthetic peptidoglycan transglycosylase [Phocaeicola sp.]	0.0395949	none
FHJOOPKJ_01817	8.66667	11	1.49	1.43667	-0.0141179	1	1	WP_117597329.1	MULTISPECIES: DUF3874 domain-containing protein [Bacteroidaceae]	0	none
FHJOOPKJ_00736	479.333	606	65.5167	64.18	-0.0150765	0.881674	0.902286	WP_005841989.1	MULTISPECIES: MATE family efflux transporter [Bacteroidaceae]	0.0546921	none
[truncated: 1,804 more rows]

## Sheet: SupTable9
Supplementary Table 9 Fold change (log2) of gene expression of Parabacteroides distasonis under GPs
[truncated: 3,809 more rows]

[truncated: 5 more sheets: SupTable10, SupTable11, SupTable12, SupTable13, SupTable14]
